# Supplementary material
Source: Royal Society of Chemistry journal article supplement (doi:10.1039/d6ob00258g)
Supplement: d6ob00258g1.pdf [file d6ob00258g1.pdf]

Supporting Information

## **Harnessing the Magic Methyl Effect: A Rhodium-Catalyzed Switchable Chemoselective Synthesis of Isocoumarins and Isoquinolines**

Bedadyuti Vedvyas Pati,<sup>[a,b]</sup> Smruti Ranjan Mohanty,<sup>[a,b]</sup> Lamphiza O Najjar,<sup>[a,b]</sup>  
Subhrakant Jena,<sup>[a,b]</sup> Tanmayee Nanda,<sup>[a,b]</sup> Himansu S. Biswal<sup>[a,b]</sup>  
and Ponneri C. Ravikumar<sup>\*[a,b,c]</sup>

<sup>[a]</sup> School of Chemical Sciences, National Institute of Science Education and Research (NISER) Bhubaneswar, HBNI, Jatani, Khurda, 752050 Odisha, India

<sup>[b]</sup> Homi Bhabha National Institute, Training School Complex, Anushaktinagar, Mumbai, 400094, India

<sup>[c]</sup> Department of Chemistry, Indian Institute of Science Education and Research (IISER) Tirupati, Yerpedu, AP 517619, India

\* Email: [pc-ravikumar@iisertirupati.ac.in](mailto:pc-ravikumar@iisertirupati.ac.in)

## Contents

|    |                                                                                                                                                                        |         |
|----|------------------------------------------------------------------------------------------------------------------------------------------------------------------------|---------|
| 1. | General information & List of abbreviation                                                                                                                             | S4      |
| 2. | Experimental details                                                                                                                                                   | S5-S12  |
|    | 2.1 Optimization of reaction conditions                                                                                                                                | S5-S6   |
|    | 2.2 General procedure for the preparation of <i>O</i> -benzoyl oxime (Procedure A)                                                                                     | S7      |
|    | 2.3 General procedure for the preparation of <i>O</i> -benzoyl oxime (Procedure B)                                                                                     | S7      |
|    | 2.4 General procedure for C( <i>sp</i> <sup>2</sup> )-H activation/annulation of <i>O</i> -benzoyl oxime with alkynes for the synthesis of isocoumarins (Procedure C)  | S8      |
|    | 2.5 General procedure for C( <i>sp</i> <sup>2</sup> )-H activation/annulation of <i>O</i> -benzoyl oxime with alkynes for the synthesis of isoquinolines (Procedure D) | S8-S9   |
|    | 2.6 General procedure for C( <i>sp</i> <sup>2</sup> )-H activation/annulation of <i>O</i> -benzoyl oxime with alkynes in 1 mmol scale (Procedure E)                    | S9      |
|    | 2.7 Synthetic derivatization of isocoumarin molecules                                                                                                                  | S10-S12 |
|    | 2.7.1 General Procedure for the Arylation of <b>3oa</b> with phenyl boronic acid                                                                                       | S10     |
|    | 2.7.2 General Procedure for the Alkynylation of <b>3pa</b> with phenyl acetylene                                                                                       | S10     |
|    | 2.7.3 General Procedure for the Alkynylation of <b>3pa</b> with trimethylsilyl acetylene                                                                               | S11     |
|    | 2.7.4 General Procedure for the desilylation of <b>11</b>                                                                                                              | S11     |
|    | 2.7.5 General procedure for the synthesis of isoquinolone <b>13</b> from isocoumarin <b>3aa</b>                                                                        | S12     |
| 3. | Mechanistic investigations                                                                                                                                             | S12-S20 |
|    | 3.1 Deuterium labeling experiments                                                                                                                                     | S12-S13 |
|    | 3.2 Intermolecular competition KIE for the reaction                                                                                                                    | S14-S15 |
|    | 3.3 Kinetic isotope effect: Parallel reactions                                                                                                                         | S16     |
|    | 3.4 Intermolecular competitive reaction between two different <i>O</i> -benzoyl oximes                                                                                 | S17-S18 |
|    | 3.5 Intermolecular competitive reaction between two different alkynes                                                                                                  | S19-S20 |
| 4. | Proposed Catalytic Cycle                                                                                                                                               | S21     |
| 5. | Experimental characterization data for the starting materials and products                                                                                             | S22-S65 |
|    | 5.1 Experimental characterization data for the <i>O</i> -benzoyl oximes                                                                                                | S23-S39 |

|    |                                                              |          |
|----|--------------------------------------------------------------|----------|
|    | 5.2 Experimental characterization data for the compounds     | S39-S65  |
| 6. | Copies of NMR spectra of the starting materials and products | S66-S150 |
|    | 6.1 Copies of NMR spectra of the <i>O</i> -benzoyl oximes    | S66-S97  |
|    | 6.2 Copies of NMR spectra of the products                    | S98-S150 |
| 7. | References                                                   | S151     |

## 1. General Information:

Reactions were performed using borosil sealed tube vial under N<sub>2</sub> atmosphere. Solvents were dehydrated and distilled under nitrogen. Column chromatography was done by using 100-200 mesh silica gel of Acme synthetic chemicals company. A gradient elution was performed by using distilled petroleum ether and ethyl acetate. TLC plates detected under UV light at 254 nm and vanillin. <sup>1</sup>H NMR, <sup>13</sup>C NMR, recorded on Bruker AV 400 and 700 MHz spectrometer using CDCl<sub>3</sub> as the deuterated solvent.<sup>1</sup> Multiplicity (s = singlet, d = doublet, t = triplet, q = quartet, quint = quintet, sept = septet, m = multiplet, dd = doublet of doublet, dt = doublet of triplet, td = triplet of doublet, br = broad signal), integration, and coupling constants (*J*) in hertz (Hz). HRMS signal analysis was performed using micro TOF Q-II mass spectrometer and Waters LCT Premier XE spectrometer. Reagents and starting materials were purchased from Sigma Aldrich, TCI, Avra, Spectrochem and other commercially available sources, used without further purification unless otherwise noted. *O*-benzoyl oxime and its derivatives,<sup>2</sup> internal alkynes,<sup>3,4</sup> and [Cp\*RhCl<sub>2</sub>]<sub>2</sub>,<sup>5</sup> were prepared according to the literature reported procedure.

### Abbreviation:

**TFE** (Trifluoroethanol), **EtOAc** (Ethyl acetate), **DCM** (Dichloromethane), **Et<sub>3</sub>N** (Triethyl amine), **EDC.HCl** (*N*-(3-Dimethylaminopropyl)-*N'*-ethylcarbodiimide hydrochloride), **DMAP** (4-(Dimethylamino)pyridine).

## 2. Experimental details

### 2.1 Optimization of reaction conditions

We commenced our study for finding the suitable reaction conditions for the rhodium catalyzed chemoselective C(*sp*<sup>2</sup>)-H activation/annulation of *O*-benzoyl oxime with alkynes. Subsequently, (*E*)-benzaldehyde *O*-benzoyl oxime **1a** and 1,2-diphenylethyne **2a** were chosen as the model substrates in the presence of 5 mol % of a rhodium catalyst. Initially, different solvents were screened with Ag<sub>2</sub>CO<sub>3</sub> as an additive at 60 °C (Table S1, entries 1-5). With *t*-amyl alcohol as solvent we were able to get desired annulated product in 8% yield. The use of various other solvents such as 1,4-dioxane, THF, MeCN and TFE produced the annulated product **3aa** in 21%, 33%, 45%, and 49% yields respectively. As TFE gave the better yield among the solvents used, we stuck to TFE and varied different silver additives for further improvement of the yield. Interestingly, the other silver additives such as Ag<sub>2</sub>O, AgBF<sub>4</sub>, AgOCOCF<sub>3</sub>, AgOTf and AgOAc helped significantly to enhance the product yield (Table S1, entries 6-10). It is worthy to mention that AgOAc was found to be most effective among them, affording 67% yield of **3aa**. Intrigued by these results, we next investigated the effect of different acetate additives on the outcome of the reaction (Table S1, entries 11-13). Interestingly, the yield of **3aa** further improved in the cases of KOAc (76%) and NaOAc (89%) (Table S1, entries 12 and 13). However, attempts to carry out the reaction at higher or lower temperatures resulted in lower product yield, affording the desired product in 76% and 5% yield respectively (Table S1, entries 14-15). Efforts to replace the catalyst [Cp\**RhCl*<sub>2</sub>]<sub>2</sub> with [Rh<sub>2</sub>(OAc)<sub>4</sub>], and [Rh<sub>2</sub>(TFA)<sub>4</sub>] had a deleterious effect on the reaction furnishing the desired product in <5% and 5% yields respectively (Table S1, entries 16-17). To check the effect of NaOAc additive and [Cp\**RhCl*<sub>2</sub>]<sub>2</sub> catalyst we performed two control experiments. In the absence of NaOAc, 42% of **3aa** was obtained while without [Cp\**RhCl*<sub>2</sub>]<sub>2</sub> catalyst no product was observed. (Table S1, entries 18-19). Hence, the use of 5 mol % of [Cp\**RhCl*<sub>2</sub>]<sub>2</sub> along with 30 mol % of NaOAc in TFE (0.1 M) at 60 °C gave the best yield of **3aa** (Table S1, entry 13).

**Table S1: Optimization of reaction conditions:**

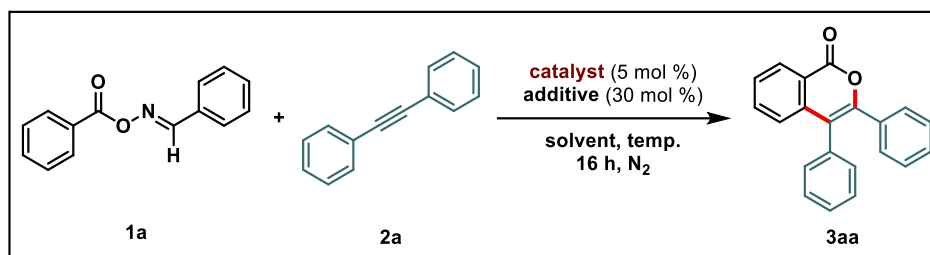

| entry           | solvent (0.1 M) | catalyst                                 | additive                        | yield of 3aa (%) <sup>b</sup> |
|-----------------|-----------------|------------------------------------------|---------------------------------|-------------------------------|
| 1               | t-amyl alcohol  | [Cp*RhCl <sub>2</sub> ] <sub>2</sub>     | Ag <sub>2</sub> CO <sub>3</sub> | 8                             |
| 2               | 1,4-Dioxane     | [Cp*RhCl <sub>2</sub> ] <sub>2</sub>     | Ag <sub>2</sub> CO <sub>3</sub> | 21                            |
| 3               | THF             | [Cp*RhCl <sub>2</sub> ] <sub>2</sub>     | Ag <sub>2</sub> CO <sub>3</sub> | 33                            |
| 4               | MeCN            | [Cp*RhCl <sub>2</sub> ] <sub>2</sub>     | Ag <sub>2</sub> CO <sub>3</sub> | 45                            |
| 5               | TFE             | [Cp*RhCl <sub>2</sub> ] <sub>2</sub>     | Ag <sub>2</sub> CO <sub>3</sub> | 49                            |
| 6               | TFE             | [Cp*RhCl <sub>2</sub> ] <sub>2</sub>     | Ag <sub>2</sub> O               | 58                            |
| 7               | TFE             | [Cp*RhCl <sub>2</sub> ] <sub>2</sub>     | AgBF <sub>4</sub>               | 61                            |
| 8               | TFE             | [Cp*RhCl <sub>2</sub> ] <sub>2</sub>     | AgOCOCF <sub>3</sub>            | 65                            |
| 9               | TFE             | [Cp*RhCl <sub>2</sub> ] <sub>2</sub>     | AgOTf                           | 66                            |
| 10              | TFE             | [Cp*RhCl <sub>2</sub> ] <sub>2</sub>     | AgOAc                           | 67                            |
| 11              | TFE             | [Cp*RhCl <sub>2</sub> ] <sub>2</sub>     | LiOAc                           | 36                            |
| 12              | TFE             | [Cp*RhCl <sub>2</sub> ] <sub>2</sub>     | KOAc                            | 76                            |
| <b>13</b>       | <b>TFE</b>      | <b>[Cp*RhCl<sub>2</sub>]<sub>2</sub></b> | <b>NaOAc</b>                    | <b>89 (87)</b>                |
| 14 <sup>d</sup> | TFE             | [Cp*RhCl <sub>2</sub> ] <sub>2</sub>     | NaOAc                           | 76 <sup>d</sup>               |
| 15 <sup>e</sup> | TFE             | [Cp*RhCl <sub>2</sub> ] <sub>2</sub>     | NaOAc                           | 5 <sup>e</sup>                |
| 16              | TFE             | [Rh <sub>2</sub> (OAc) <sub>4</sub> ]    | NaOAc                           | <5                            |
| 17              | TFE             | [Rh <sub>2</sub> (TFA) <sub>4</sub> ]    | NaOAc                           | 5                             |
| 18              | TFE             | [Cp*RhCl <sub>2</sub> ] <sub>2</sub>     | --                              | 42                            |
| 19              | TFE             | --                                       | NaOAc                           | nd <sup>c</sup>               |

<sup>a</sup>Unless otherwise specified, all reactions were carried out using catalyst (5 mol %), additive (0.3 equiv), **1a** (0.10 mmol, 1.0 equiv), **2a** (0.10 mmol, 1.5 equiv) in a solvent (0.10 M) at 60 °C for 16 h. <sup>b</sup>Yields determined by NMR, using 1,3,5-trimethoxy benzene as internal reference. <sup>c</sup>nd = not detected. <sup>d</sup>Reaction was carried out at 90 °C. <sup>e</sup>Reaction was carried out at rt. Isolated yield is mentioned in the parenthesis.

## 2.2 General procedure for the preparation of *O*-benzoyl oxime

### [General Procedure A]

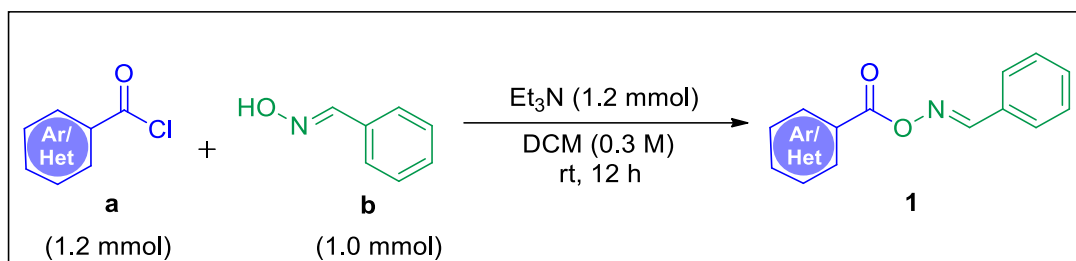

*O*-benzoyl oximes (**1**) were prepared following the previously reported procedure.<sup>1</sup> The corresponding benzoyl chloride (**a**) (1.2 mmol) was added to a solution of aldoxime (**b**) (1.0 mmol) and Et<sub>3</sub>N (1.5 mmol) in DCM (0.30 M) with stirring at ice cold temperature. After addition was complete, the reaction mixture was stirred for 12 h at room temperature. Then saturated NH<sub>4</sub>Cl aq. (3 mL) was added to quench the reaction. The organic layer was washed with brine (10 mL) and extracted with DCM (20 mL). The combined organic layer was dried over MgSO<sub>4</sub>, filtered, and concentrated in vacuum. The remaining crude mixture was purified by silica gel column chromatography to afford pure *O*-benzoyl oximes (**1**) in pure form.

## 2.3 General procedure for the preparation of *O*-benzoyl oxime

### [General Procedure B]

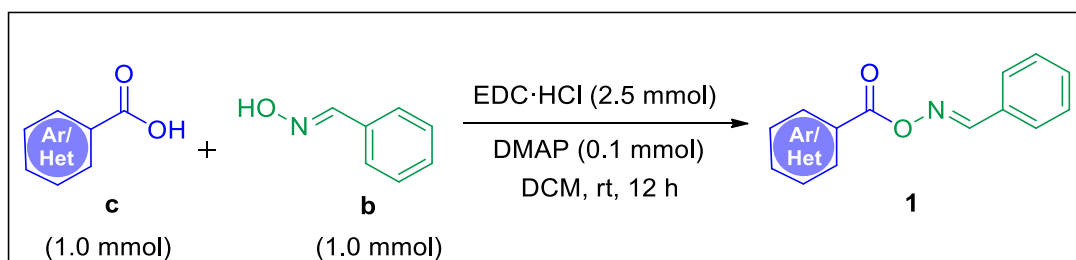

*O*-benzoyl oximes (**1**) were prepared following the previously reported procedure.<sup>1</sup> To a solution of aldoxime (**b**) (1.0 mmol) in DCM (10 mL) was added aromatic carboxylic acid (**c**) (1.0 mmol) followed by EDC·HCl (2.5 mmol) and DMAP (0.1 mmol). The mixture was magnetically stirred at r.t. under N<sub>2</sub> atmosphere until the reaction was complete (TLC monitoring). The mixture was diluted with H<sub>2</sub>O (15 mL) and the CH<sub>2</sub>Cl<sub>2</sub> layer was separated. The CH<sub>2</sub>Cl<sub>2</sub> layer was dried over anhydrous Na<sub>2</sub>SO<sub>4</sub>, and concentrated. The crude mass obtained was treated with PE (2–3 mL); separation of a solid occurred when sonicated. The resultant solid was filtered and dried under suction to afford the oxime esters (**1**) in pure form.

## 2.4 General procedure for chemoselective *ortho*-C(sp<sup>2</sup>)-H activation/annulation of *O*-benzoyl oxime with alkynes for the synthesis of isocoumarins

### [General Procedure C]

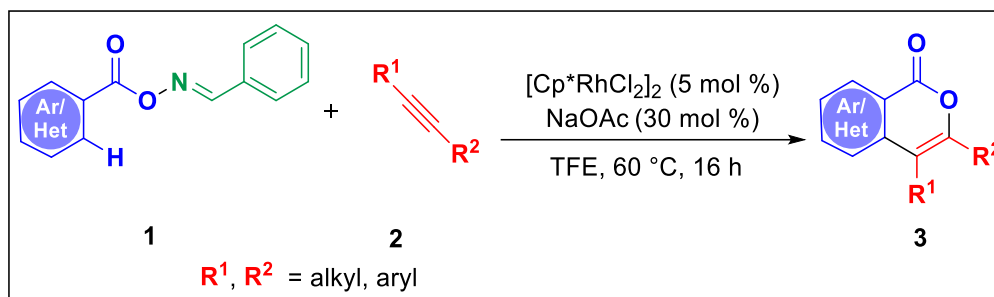

A flame-dried 15 mL screw capped vial equipped with magnetic stir bar was charged with *O*-benzoyl oxime **1** (0.10 mmol, 2 equiv), alkyne **2** (0.13 mmol, 1 equiv), [Cp<sup>\*</sup>RhCl<sub>2</sub>]<sub>2</sub> (0.005 mmol), AgOAc (0.03 mmol), and TFE (1.0 mL). Then the contents were allowed to stir at 60 °C in a preheated aluminum block for 16 h. The completion of the reaction was monitored by TLC. Upon completion of the reaction, the tube was cooled down to room temperature, the reaction mixture was diluted with 5 mL of dichloromethane and filtered with a plug Celite bed, followed by washing with 20 mL of dichloromethane. The combined residue was concentrated under reduced pressure, and the resulting crude was purified by silica gel column chromatography using hexane/ethyl acetate to afford the desired product **3**.

## 2.5 General procedure for chemoselective *ortho*-C(sp<sup>2</sup>)-H activation/annulation of *O*-benzoyl oxime with alkynes for the synthesis of isoquinolines

### [General Procedure D]

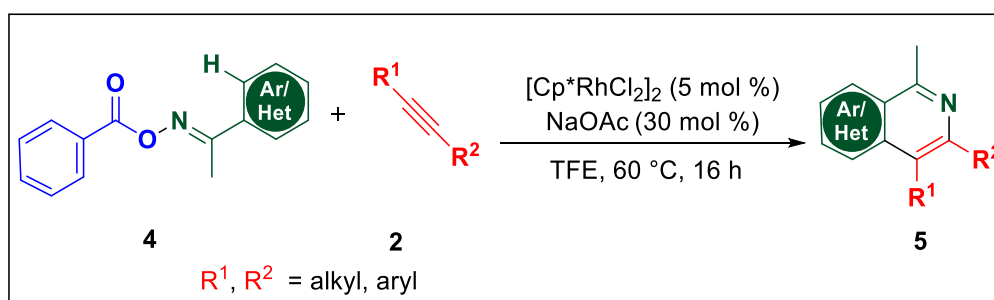

A flame-dried 15 mL screw capped vial equipped with magnetic stir bar was charged with *O*-benzoyl oxime **4** (0.10 mmol, 2 equiv), alkyne **2** (0.13 mmol, 1 equiv), [Cp<sup>\*</sup>RhCl<sub>2</sub>]<sub>2</sub> (0.005 mmol), AgOAc (0.03 mmol), and TFE (1.0 mL). Then the contents were allowed to stir at 60

°C in a preheated aluminum block for 16 h. The completion of the reaction was monitored by TLC. Upon completion of the reaction, the tube was cooled down to room temperature, the reaction mixture was diluted with 5 mL of dichloromethane and filtered with a plug Celite bed, followed by washing with 20 mL of dichloromethane. The combined residue was concentrated under reduced pressure, and the resulting crude was purified by silica gel column chromatography using hexane/ethyl acetate to afford the desired product **5**.

## 2.6 General procedure for chemoselective *ortho*-C(sp<sup>2</sup>)-H activation/annulation of *O*-benzoyl oxime with alkynes in 1 mmol scale

### [General Procedure E]

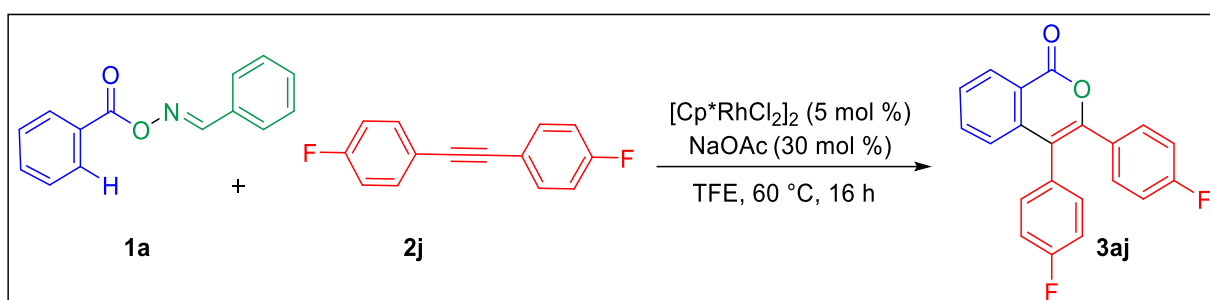

A flame-dried 25 mL screw capped vial equipped with magnetic stir bar was charged with *O*-benzoyl oxime **1a** (1.0 mmol, 1 equiv), alkyne **2j** (1.3 mmol, 1 equiv),  $[\text{Cp}^*\text{RhCl}_2]_2$  (0.05 mmol), AgOAc (0.3 mmol), and TFE (10.0 mL). Then the contents were allowed to stir at 60 °C in a preheated aluminum block for 16 h. The completion of the reaction was monitored by TLC. Upon completion of the reaction, the tube was cooled down to room temperature, the reaction mixture was diluted with 50 mL of dichloromethane and filtered with a plug Celite bed, followed by washing with 100 mL of dichloromethane. The combined residue was concentrated under reduced pressure, and the resulting crude was purified by silica gel column chromatography using hexane/ethyl acetate to afford the desired product **3aj** (277 mg) in 83% yield.

## 2.7 Synthetic derivatization of the isocoumarin molecules

### 2.7.1 Procedure for the Arylation of 30a with phenyl boronic acid.

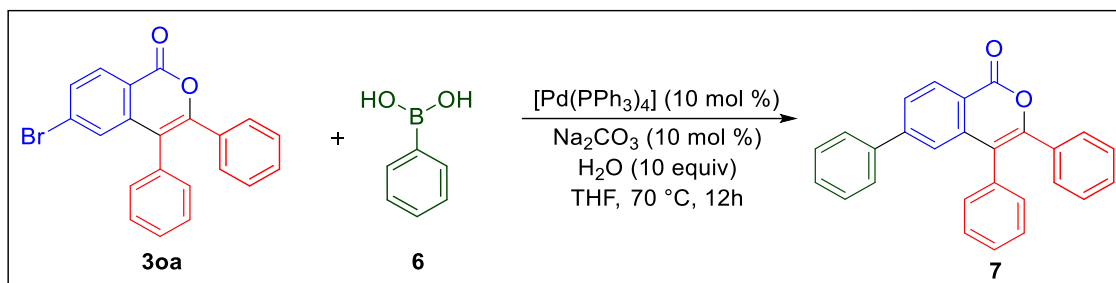

A mixture of **30a** (0.1 mmol, 1.0 equiv), phenylboronic acid **6** (0.15 mmol, 1.5 equiv), Na<sub>2</sub>CO<sub>3</sub> (10.0 equiv), and Pd(PPh<sub>3</sub>)<sub>4</sub> (10.0 mol %) in THF (1.0 mL) and H<sub>2</sub>O (0.25 mL) was stirred at 70 °C for 12 h under N<sub>2</sub> atmosphere. The mixture was added with H<sub>2</sub>O (10 mL) and extracted with CH<sub>2</sub>Cl<sub>2</sub>. The combined organic phase was dried over MgSO<sub>4</sub> and concentrated under reduced pressure. The residue was purified by chromatography on silica gel (EtOAc/hexane) to afford product **7**.

### 2.7.2 General Procedure for the Alkynylation of 3pa with phenyl acetylene.

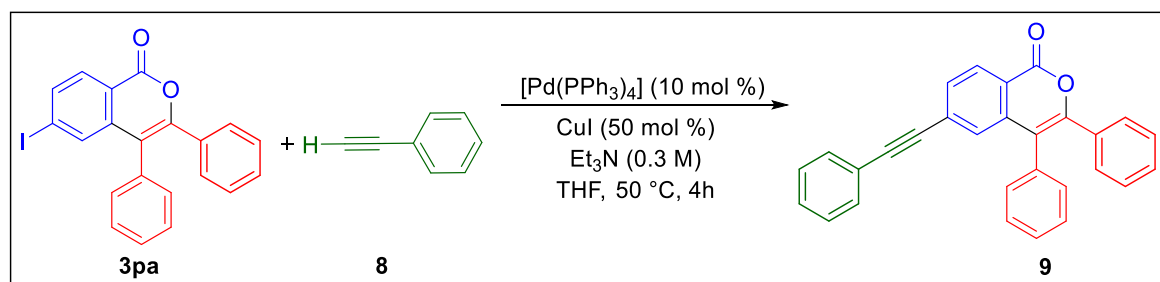

A mixture of **3pa** (0.1 mmol, 1.0 equiv), phenylacetylene **8** (1.5 mmol, 1.5 equiv), CuI (50 mol %), and Pd(PPh<sub>3</sub>)<sub>4</sub> (5.0 mol %) in THF (0.5 mL) and Et<sub>3</sub>N (0.5 mL) was stirred at 50 °C for 4 h under N<sub>2</sub> atmosphere. The reaction mixture was poured into a sat. NH<sub>4</sub>Cl solution and extracted with CH<sub>2</sub>Cl<sub>2</sub>. The combined organic phase was dried over MgSO<sub>4</sub> and concentrated under reduced pressure. The residue was purified by chromatography on silica gel (EtOAc/hexane) to afford product **9**.

### 2.7.3 General Procedure for the Alkynylation of **3pa** with trimethylsilyl acetylene.

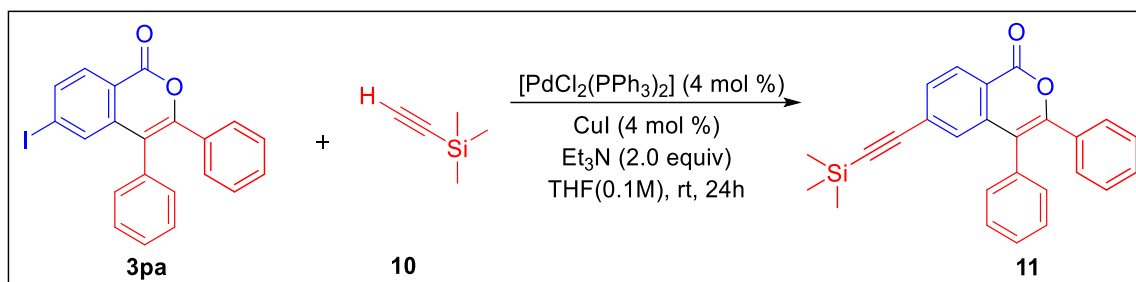

A mixture of **3pa** (0.1 mmol, 1.0 equiv), ethynyltrimethylsilane **10** (0.15 mmol, 1.5 equiv),  $\text{PdCl}_2(\text{PPh}_3)_2$  (0.04 mmol) and  $\text{CuI}$  (0.04 mmol) were mixed in THF (1.0 mL) containing  $\text{NEt}_3$  (2 equiv). The resulting solution was stirred at room temperature for 24 h. After the reaction was finished, ethyl acetate (10 mL) was poured into the mixture. The resulting mixture was then washed with brine, extracted with ethyl acetate, and dried over anhydrous  $\text{Na}_2\text{SO}_4$ . After filtration and removal of the solvents, the residue was subjected to flash column chromatography on silica gel (100-200 mesh) using (EtOAc/hexane) as eluent to afford silylated alkynes **11**.

### 2.7.4 Procedure for the desilylation of **11**.

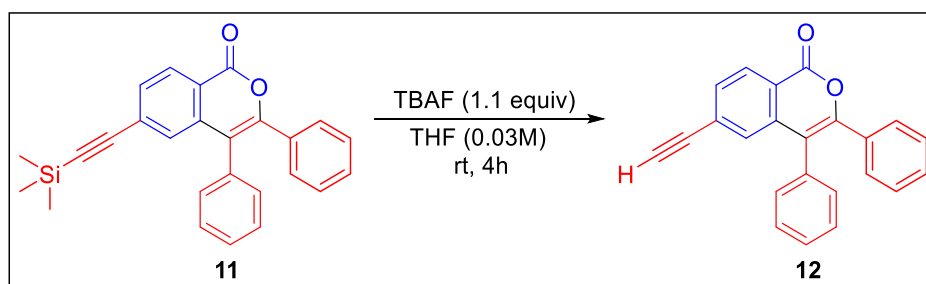

The substrate **11** (0.1 mmol) was dissolved in THF (0.03 M) and TBAF (1.0 M in THF, 0.11 mmol) was added slowly at 0 °C. The reaction mixture was stirred for 2 h at room temperature. After complete conversion of starting material, reaction mixture was evaporated *in vacuo*. The crude product, thus obtained, was purified by column chromatography (eluent: pet. ether/EtOAc) to afford the terminal alkyne **12** as a yellow solid.

## 2.7.5 Procedure for the synthesis of isoquinolone **13** from isocoumarin **3aa**.

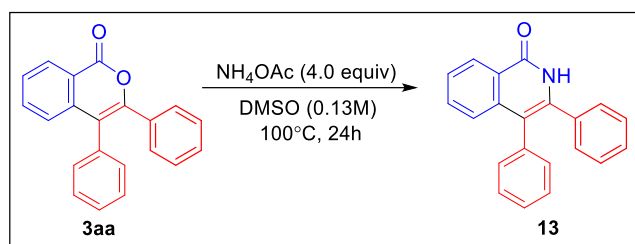

A mixture of **3aa** (0.1 mmol, 1.0 equiv),  $\text{NH}_4\text{OAc}$  (3.0 equiv) in  $\text{DMSO}$  (0.1 M, 1 mL) was stirred at  $100^\circ\text{C}$  for 4 h. The reaction mixture was poured into water and extracted with  $\text{CH}_2\text{Cl}_2$ . The combined organic phase was dried over  $\text{MgSO}_4$  and concentrated under reduced pressure. The residue was purified by chromatography on silica gel ( $\text{EtOAc}$ /hexane) to afford product **13**.

## 3. Mechanistic Investigation:

### 3.1 Deuterium labeling experiment

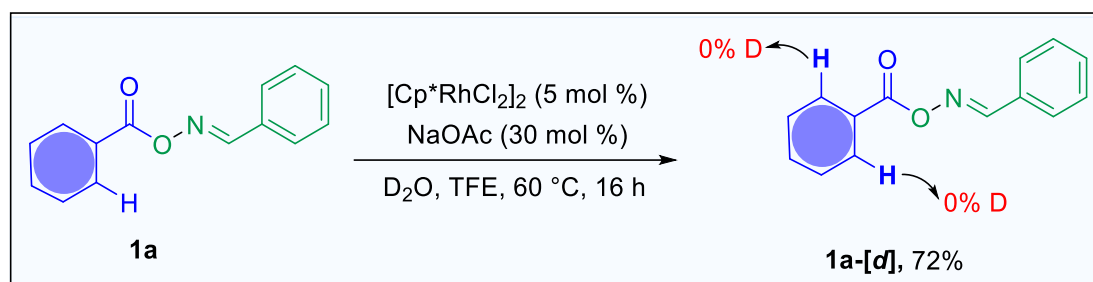

A flame-dried 15 mL screw capped vial equipped with magnetic stir bar was charged with *O*-benzoyl oxime **1a** (0.1 mmol),  $[\text{Cp}^*\text{RhCl}_2]_2$  (0.005 mmol),  $\text{NaOAc}$  (0.03 mmol),  $\text{D}_2\text{O}$  (10 equiv) and  $\text{TFE}$  ( $500\ \mu\text{L}$ ). The contents were allowed to stir at  $60^\circ\text{C}$  in a pre-heated aluminum block for 16 h. Then the contents were allowed to cool down to room temperature. Later, the reaction mixture was diluted with 10 mL of dichloromethane and filtered through a Celite pad. The filtered solution was concentrated under reduced pressure. Then, the residue was purified by column chromatography with  $\text{EtOAc}$ /Hexane as eluent. The extent H/D exchange was calculated by  $^1\text{H}$  NMR (see the following spectra).

**<sup>1</sup>H NMR of 1a (400 MHz, CDCl<sub>3</sub>)**

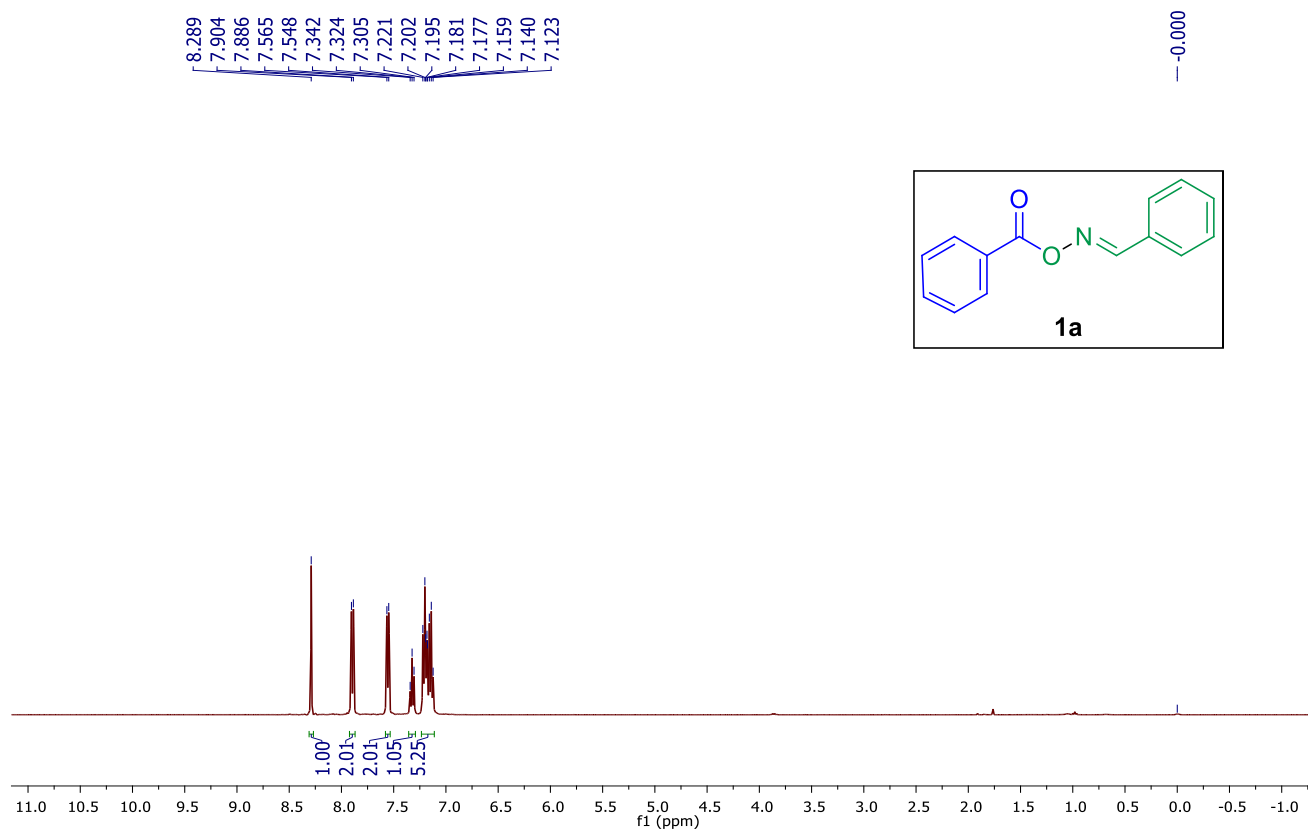

**<sup>1</sup>H NMR of 1a-[d] (400 MHz, CDCl<sub>3</sub>)**

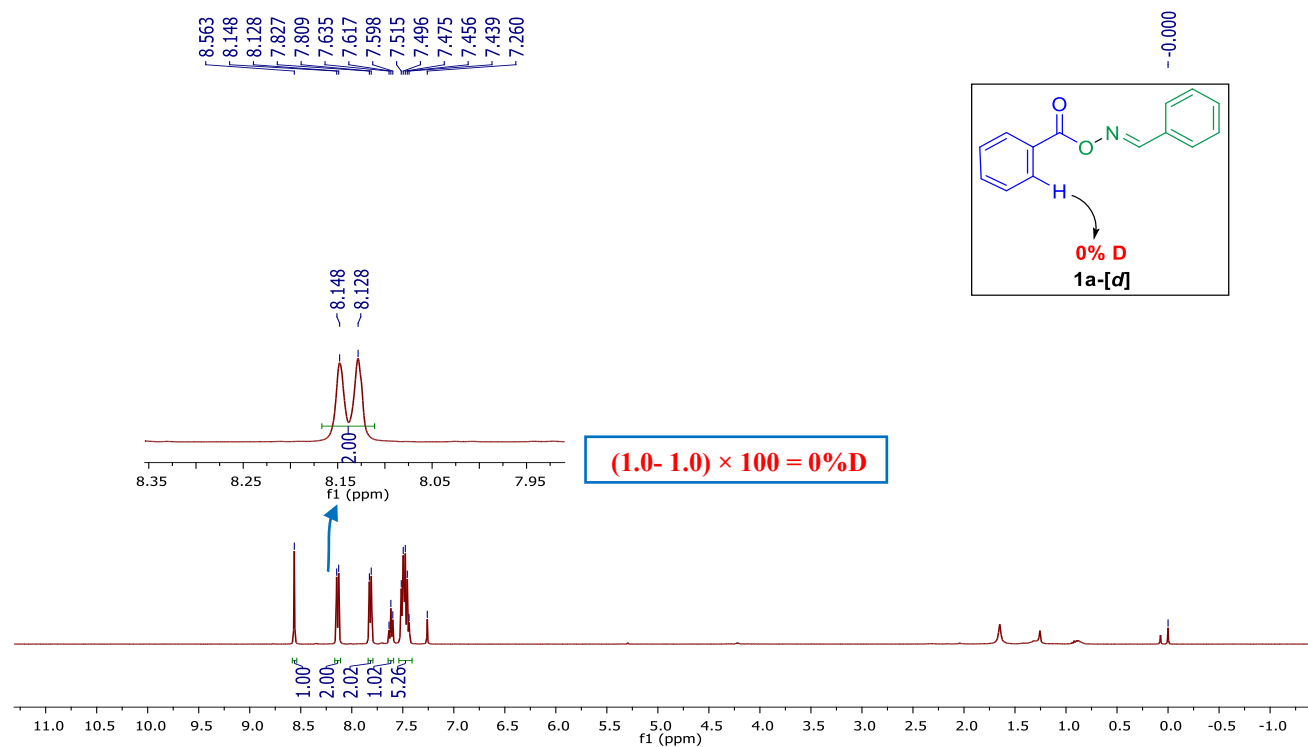

### 3.2 Intermolecular competition KIE for the reaction

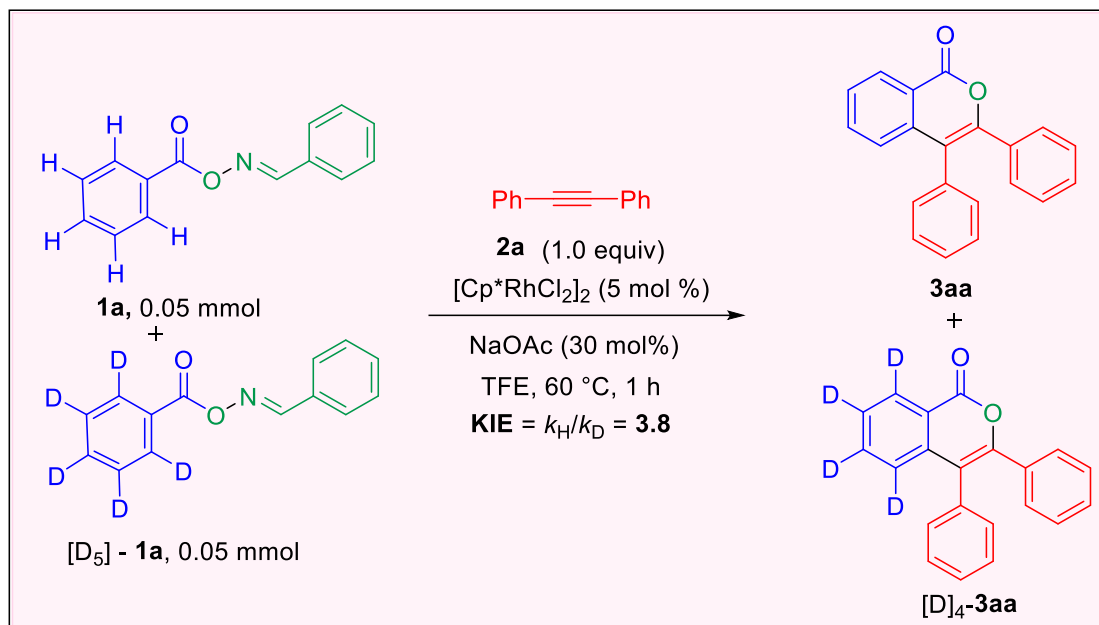

A flame-dried 5 mL screw capped vial equipped with magnetic stir bar was charged with *O*-benzoyl oxime **1a** (0.05 mmol),  $[D_5]-\mathbf{1a}$  (0.05 mmol), 1,2-diphenylethyne (**2a**, 0.05 mmol, 1 equiv),  $[Cp^*RhCl_2]_2$  (5 mol %), NaOAc (30 mol %), and TFE (0.25 mL). The contents were allowed to stir at 60 °C in a pre-heated aluminum block for 25 minutes. After 25 minutes the reaction tube was cooled down to room temperature and the reaction mixture was diluted with 1 mL of dichloromethane and filtered with a small plug of Celite bed, followed by washing with 3 mL of dichloromethane. Then, the residue was purified by column chromatography with EtOAc/Hexane as eluent to afford the desired product  $[D_4/H_4]-\mathbf{3aa}$ . The kinetic isotopic value ( $k_H/k_D \approx 3.8$ ) was calculated from the  $^1H$  NMR of the mixture  $[D_4/H_4]-\mathbf{3aa}$  (see the following spectra).

**<sup>1</sup>H NMR of 3aa (400 MHz, CDCl<sub>3</sub>)**

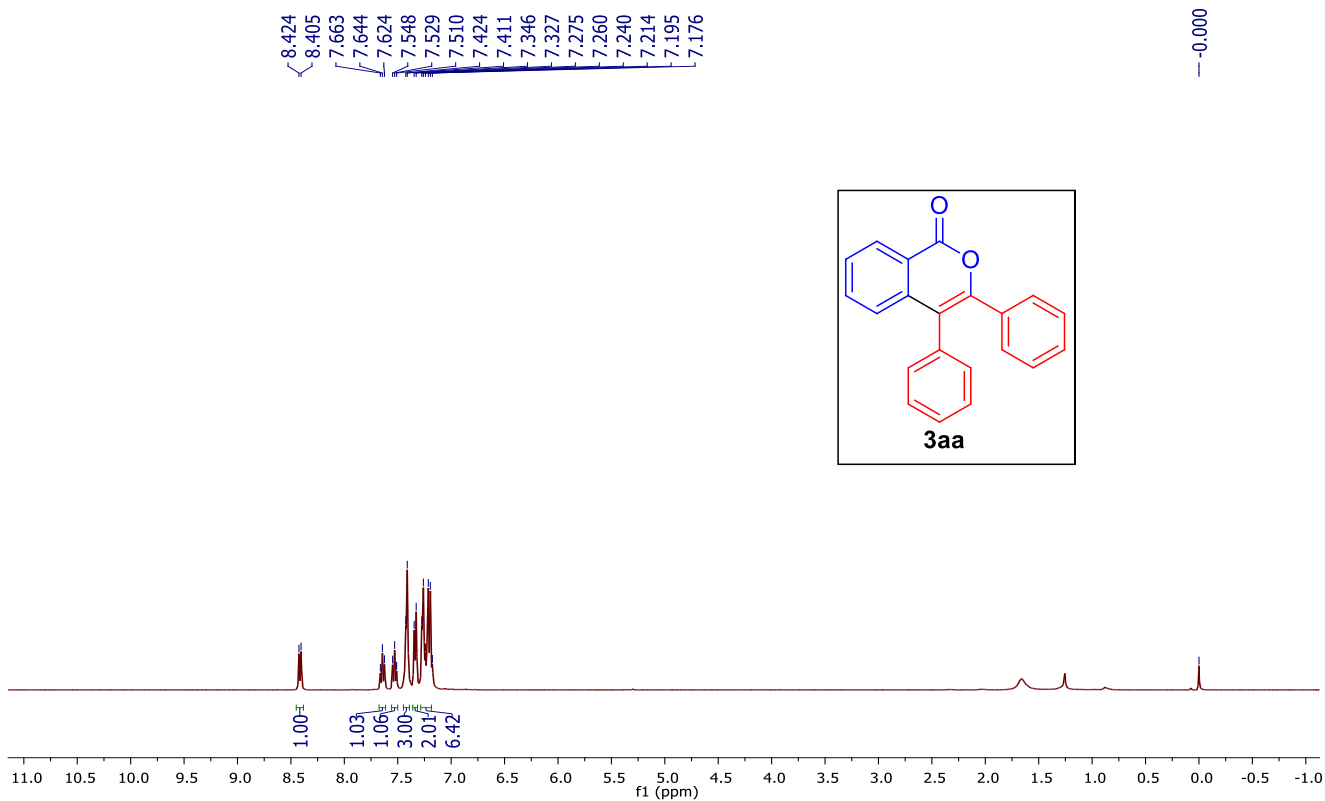

**<sup>1</sup>H NMR of [D<sub>4</sub>/H<sub>4</sub>]-3aa (400 MHz, CDCl<sub>3</sub>)**

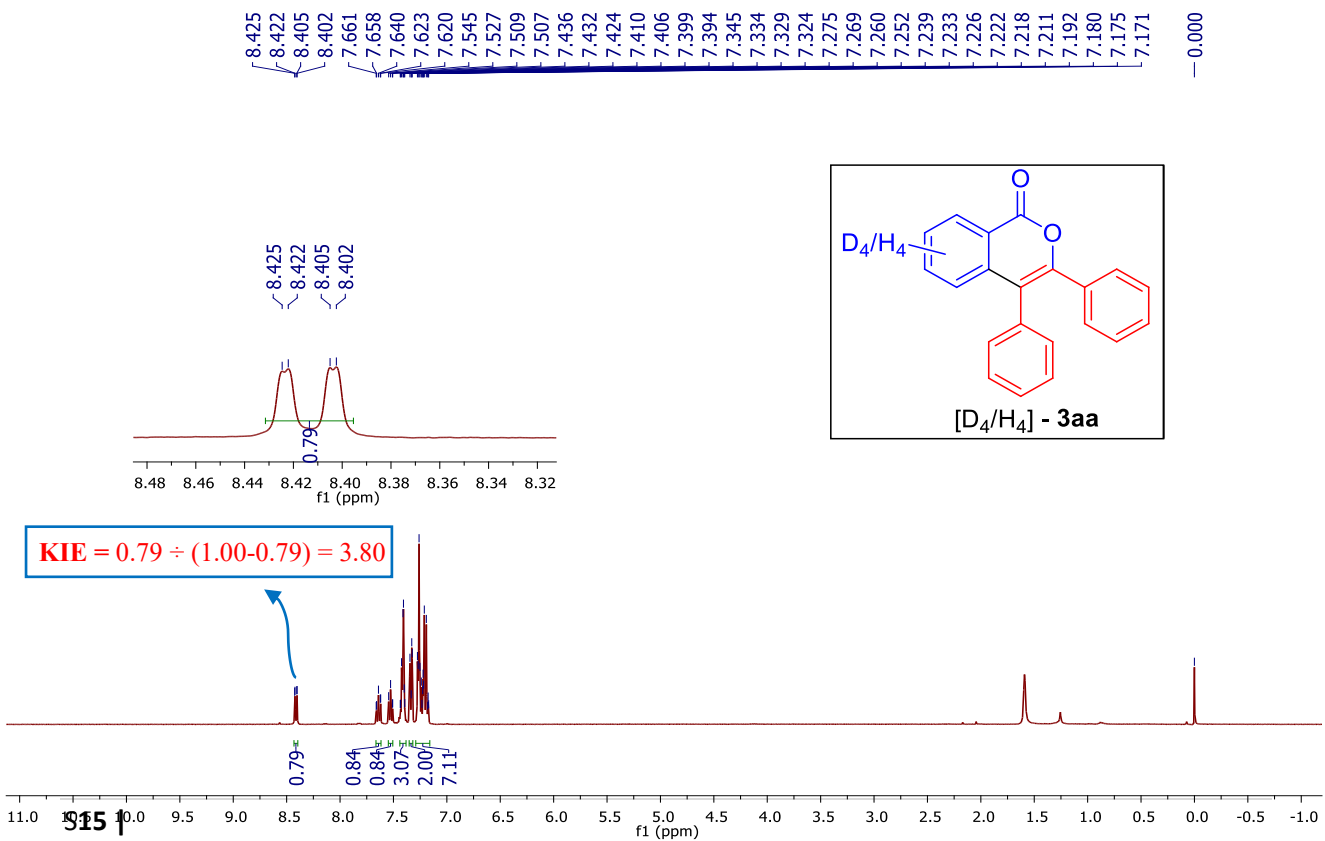

### 3.3 Kinetic isotope effect: Parallel reactions

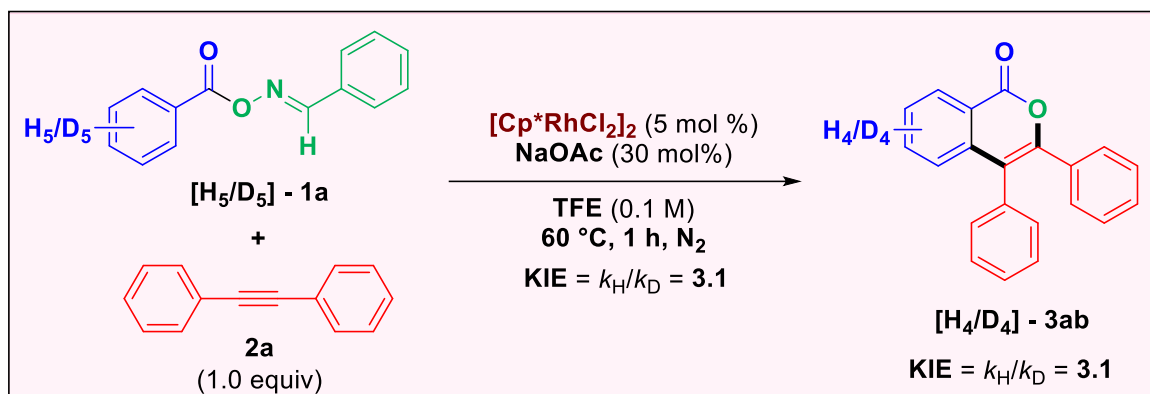

By following the general procedure, 3 sets of parallel experiments were set. To a flame-dried 5.00 mL screw capped vial equipped with magnetic stir bar were charged H<sub>5</sub>/[D]5-**1a** (1.00 equiv), 1,4-diphenylbuta-1,3-diyne (**2a**, 0.05 mmol, 1.00 equiv), [Cp\*RhCl<sub>2</sub>]<sub>2</sub> (5 mol %), NaOAc (30 mol %), and TFE (0.25 mL). The reactions were carried out at 15 min time intervals (15, 30, 45 mins) at 60 °C in a pre-heated aluminum block. The product yields were calculated from the <sup>1</sup>H NMR analysis of the crude reaction mixture using 1,3,5-trimethoxy benzene as an internal standard. The KIE value was calculated from the obtained slopes of two lines.

| Time(min)                      | 0 | 15 | 30 | 45 |
|--------------------------------|---|----|----|----|
| <b>3aa (%)</b>                 | 0 | 10 | 15 | 19 |
| <b>[D]<sub>4</sub>-3aa (%)</b> | 0 | 3  | 5  | 6  |

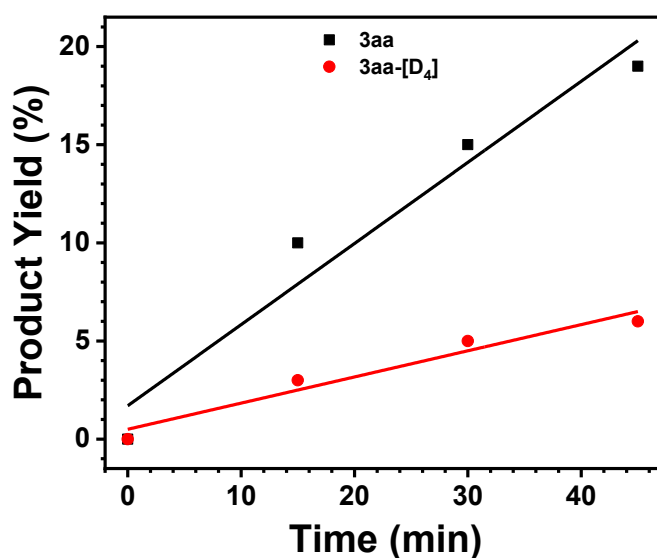

### 3.4 Intermolecular competitive reaction between two different *O*-benzoyl oximes

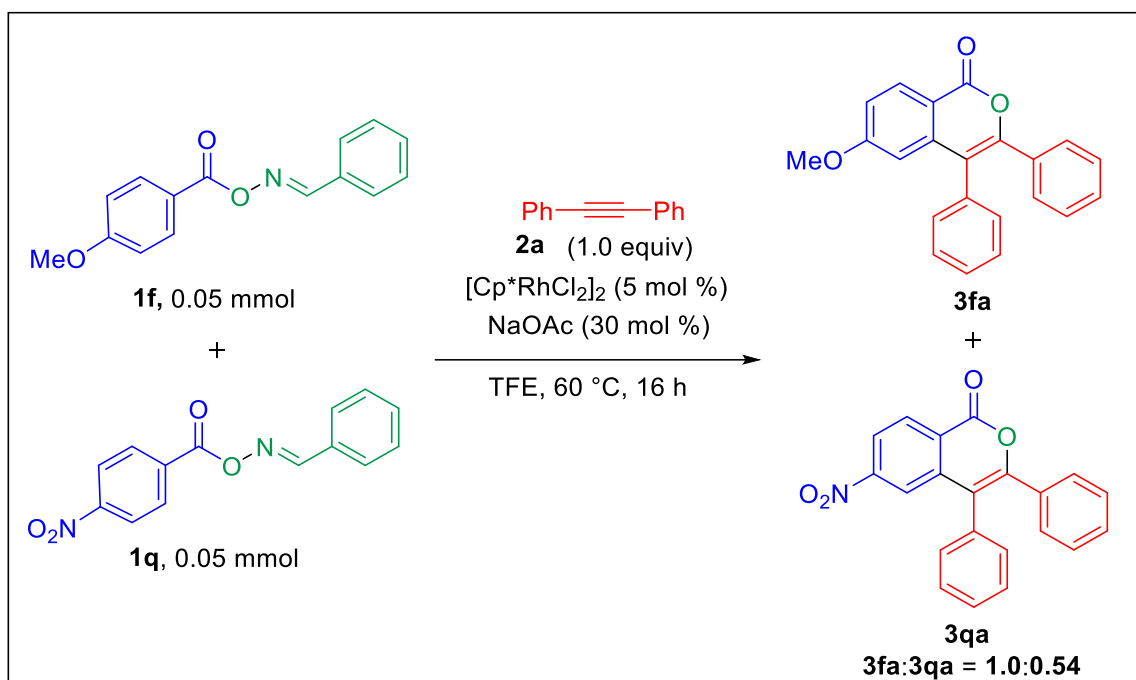

A flame-dried 5 mL screw capped vial equipped with magnetic stir bar was charged with two different *O*-benzoyl oxime (**1f**, 0.10 mmol, 1 equiv), (**1q**, 0.10 mmol, 1 equiv), 1,2-diphenylethyne (**2a**, 0.1 mmol, 1 equiv),  $[\text{Cp}^*\text{RhCl}_2]_2$  (5 mol %), (5 mol %), NaOAc (30 mol %) and TFE (0.25 mL). The contents were allowed to stir at 60 °C in a pre-heated aluminum block for 12 h. Upon completion of the standard reaction time the reaction tube was cooled to room temperature, the reaction mixture was diluted with 1 mL of dichloromethane and filtered through Celite bed, followed by washing with 3 mL of dichloromethane. The filtered solution was concentrated under reduced pressure. The ratio of two products **3fa:3qa** (1.0:0.54) was calculated from the  $^1\text{H}$  NMR analysis of the crude using 1,3,5-trimethoxy benzene as internal standard (see the following spectra).

**<sup>1</sup>H NMR of crude mixture of the competition reaction between 2a, 1f and 1q (400 MHz, CDCl<sub>3</sub>)**

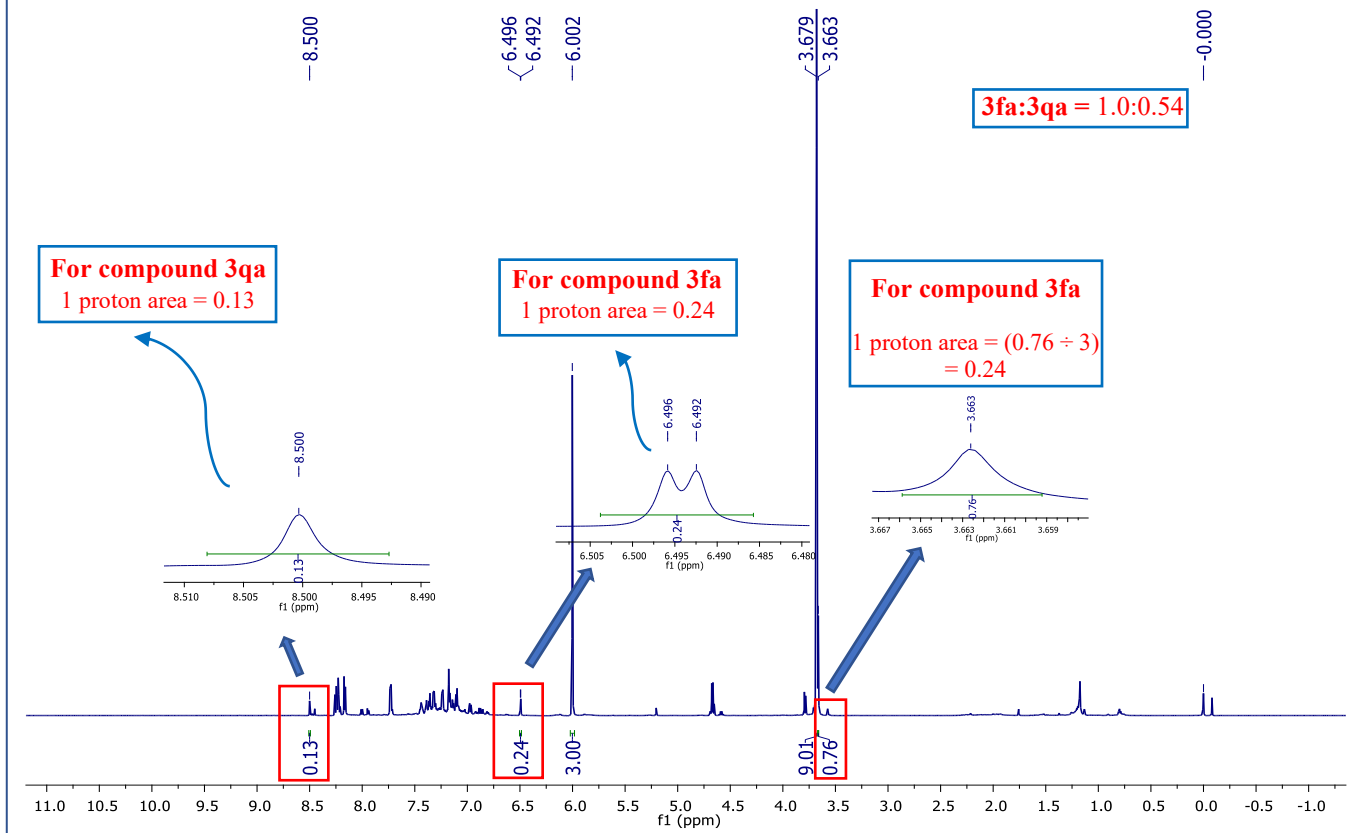

### 3.5 Intermolecular competitive reaction between two different alkynes

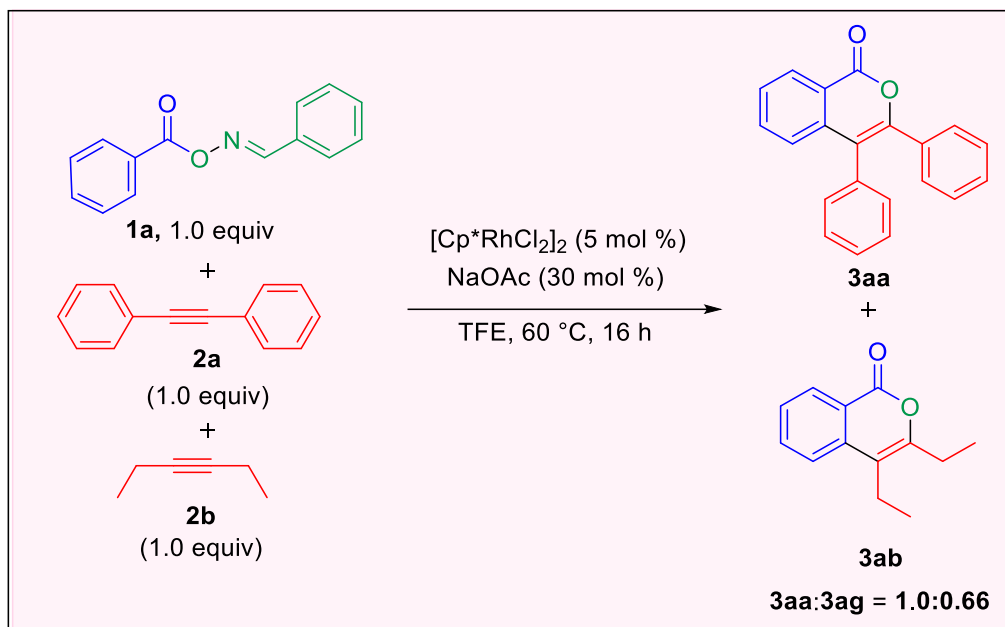

A flame-dried 5 mL screw capped vial equipped with magnetic stir bar was charged with O-benzoyl oxime (**1a**, 0.10 mmol, 1 equiv), two different alkynes (**2a**, 0.05 mmol, 1 equiv), (**2b**, 0.05 mmol, 1 equiv),  $[\text{Cp}^*\text{RhCl}_2]_2$  (5 mol %), NaOAc (30 mol %), and TFE (0.25 mL). The contents were allowed to stir at 60 °C in a pre-heated aluminum block for 16 h. Upon completion of the standard reaction time the reaction tube was cooled to room temperature, the reaction mixture was diluted with 1 mL of dichloromethane and filtered through Celite bed, followed by washing with 3 mL of dichloromethane. The filtered solution was concentrated under reduced pressure. The ratio of two products **3aa:3ab** (1:2) was calculated from the  $^1\text{H}$  NMR analysis of the crude using 1,3,5-trimethoxy benzene as internal standard (see the following spectra).

**$^1\text{H}$  NMR of crude mixture of the competition reaction between 1a, 2b and 2f (400 MHz,  $\text{CDCl}_3$ )**

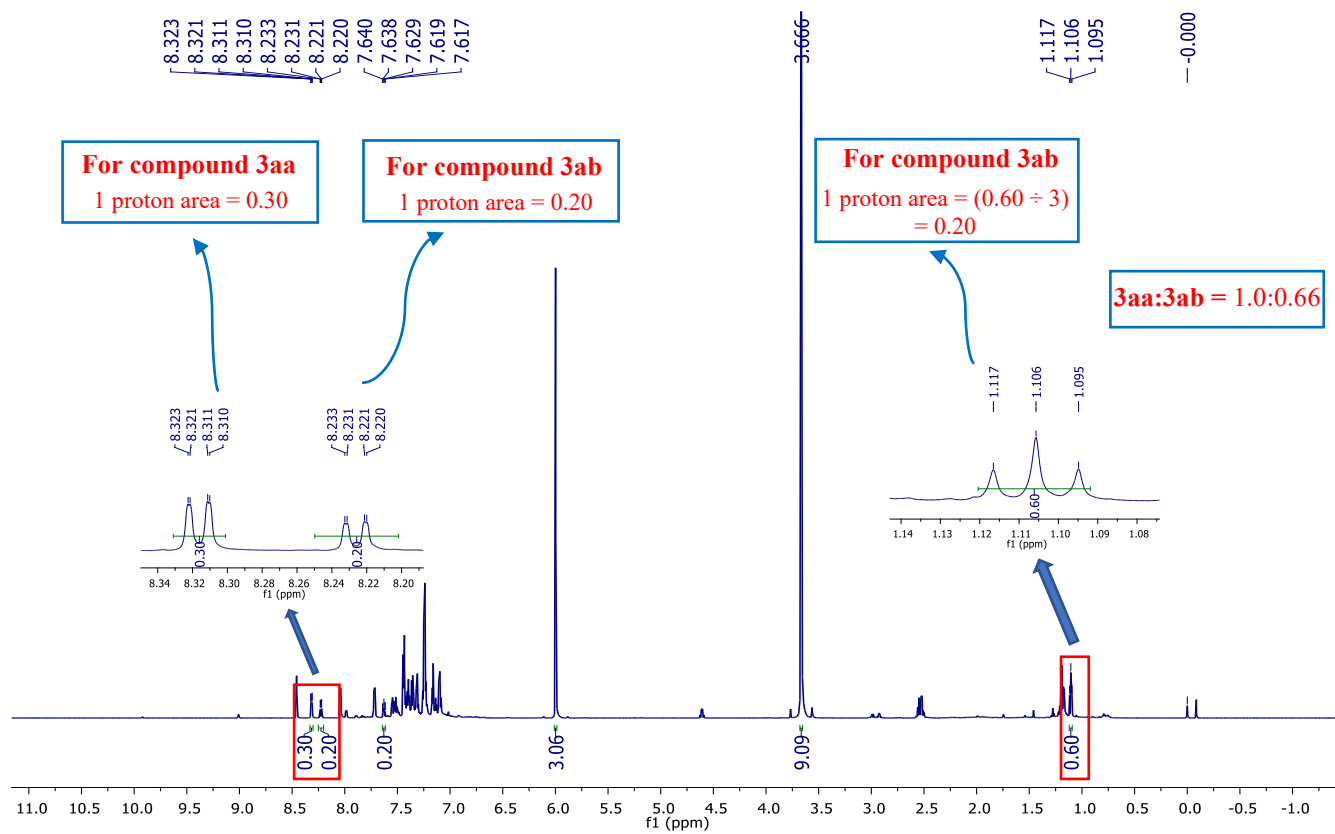

## 4. Proposed Catalytic Cycle

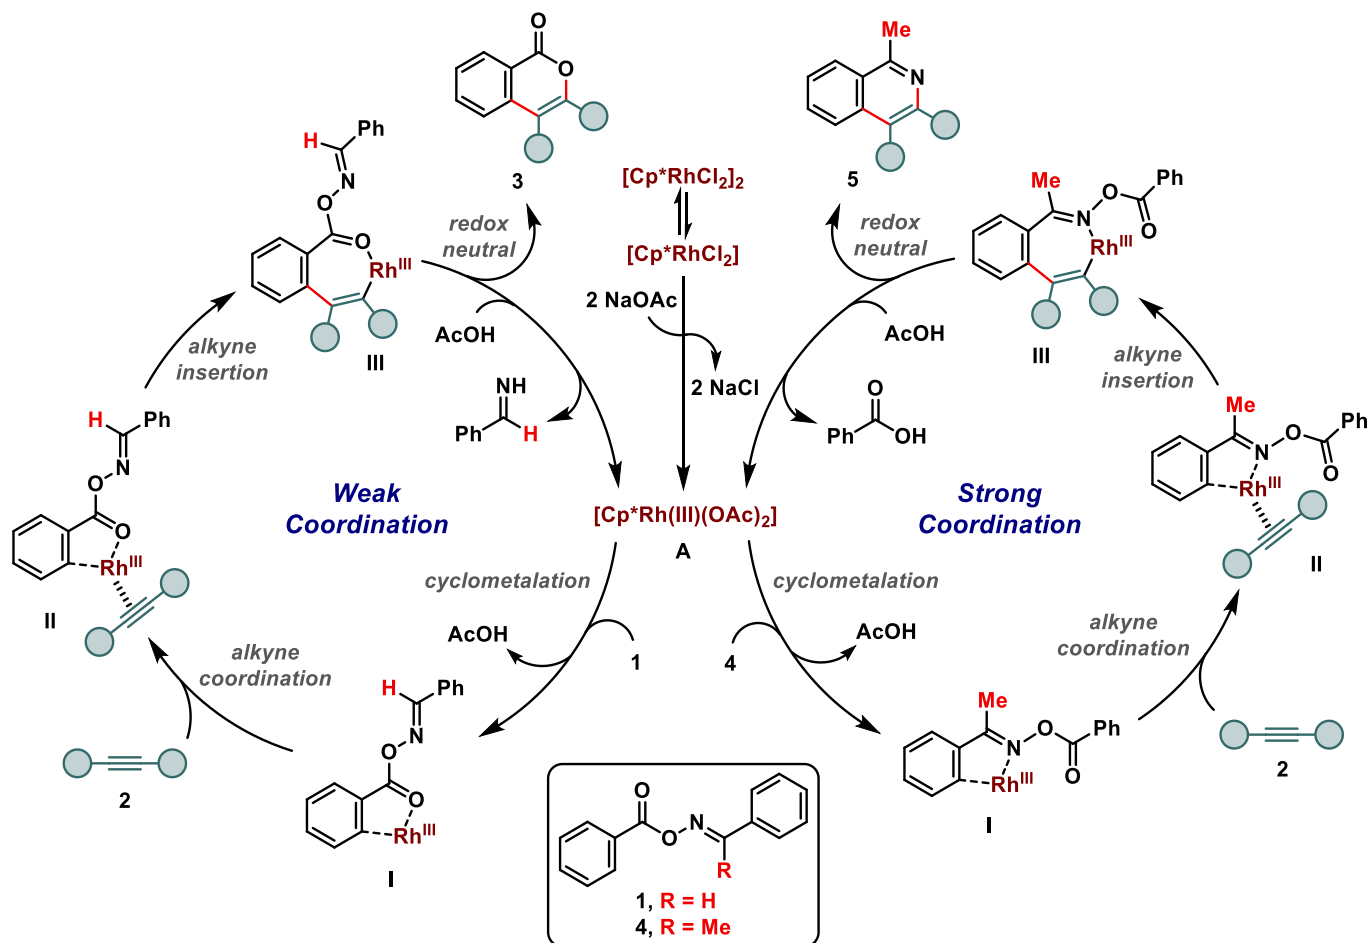

Based on the above mechanistic findings, and literature precedents, a plausible catalytic cycle is depicted above. The active Rh(III)-species **A** is generated from Rh(III)-dimer in presence of NaOAc. The *O*-benzoyl oxime **1** undergoes cyclometalation with the active catalyst species **A** to form the rhodacyclic intermediate **I**. The intermediate **II** is generated by the coordination of alkyne **2** with the rhodacycle **I**. Subsequently, the 1,2-insertion of the coordinated alkyne in the intermediate **II** leads to the generation of seven-membered rhodacycle intermediate **III**. The isocoumarin product **3** is generated by C–O bond formation, and N–O bond cleavage of intermediate **III** via a redox neutral manner to furnish imine, and active Rh(III) species **A**.

## 5. Experimental characterization data for the starting materials and products

### *O*-benzoyl oximes used in this study:

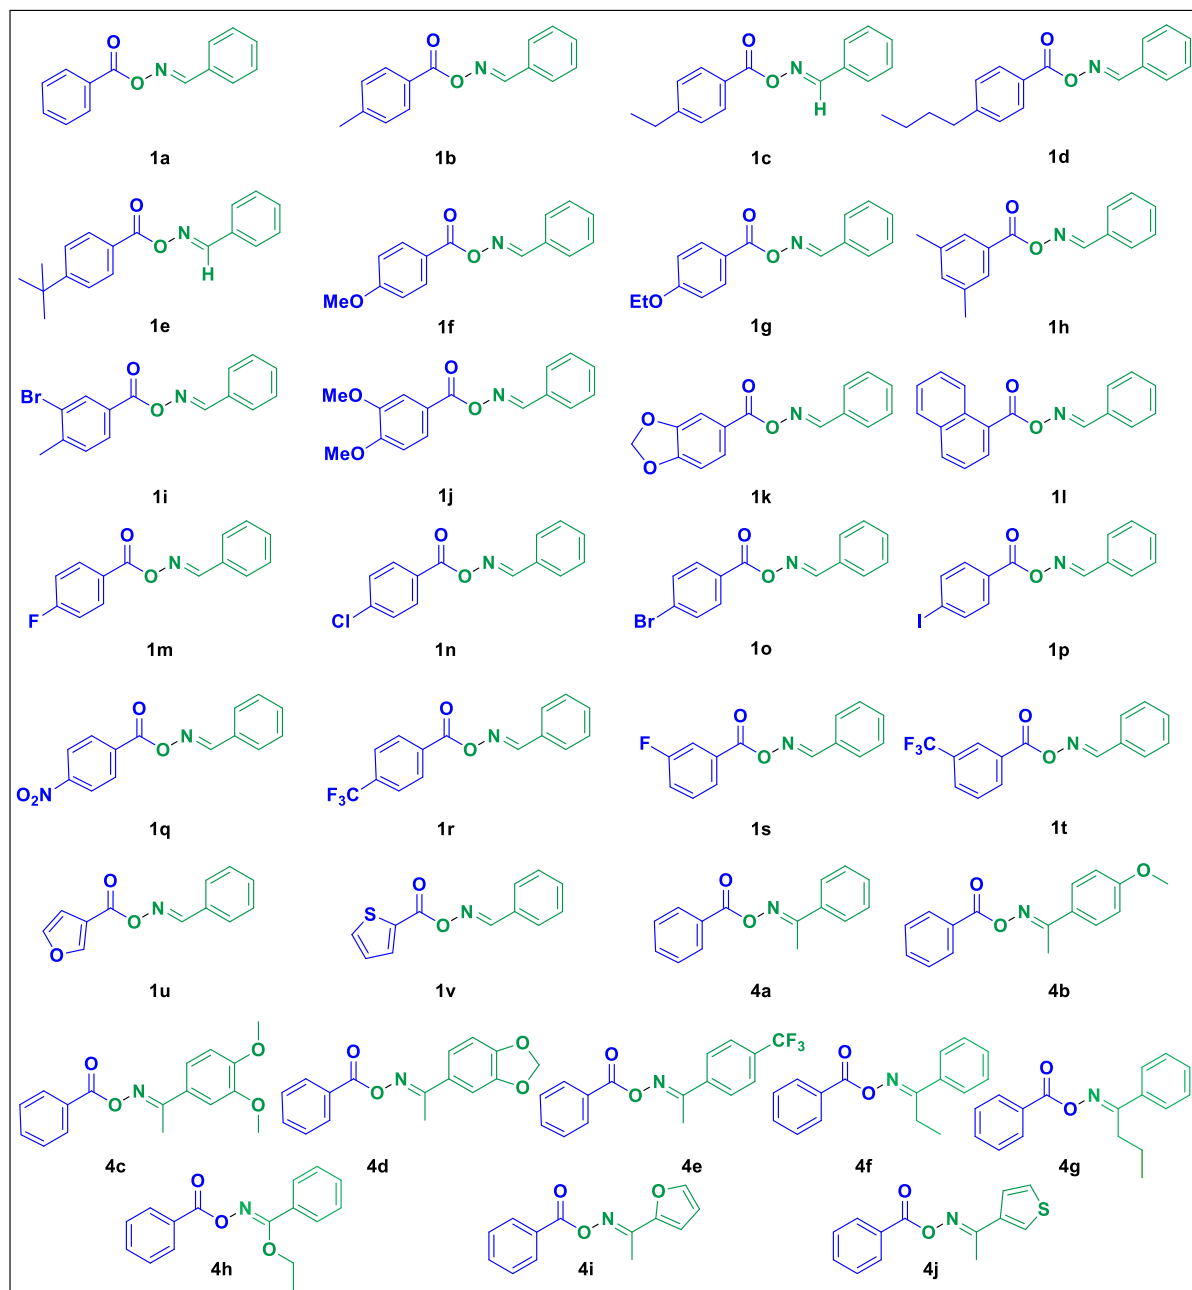

*O*-benzoyl oxime 1a, 1b, 1c, 1d, 1e, 1f, 1g, 1h, 1i, 1j, 1k, 1l, 1m, 1n, 1o, 1p, 1q, 1r, 1s, 1t, 1u, 1v, 4a, 4b, 4c, 4d, 4e, 4f, and 4g, 4h, 4i, 4j were synthesized according to the previously reported procedure<sup>1</sup> (general procedure A and B).

## Alkynes used in this study:

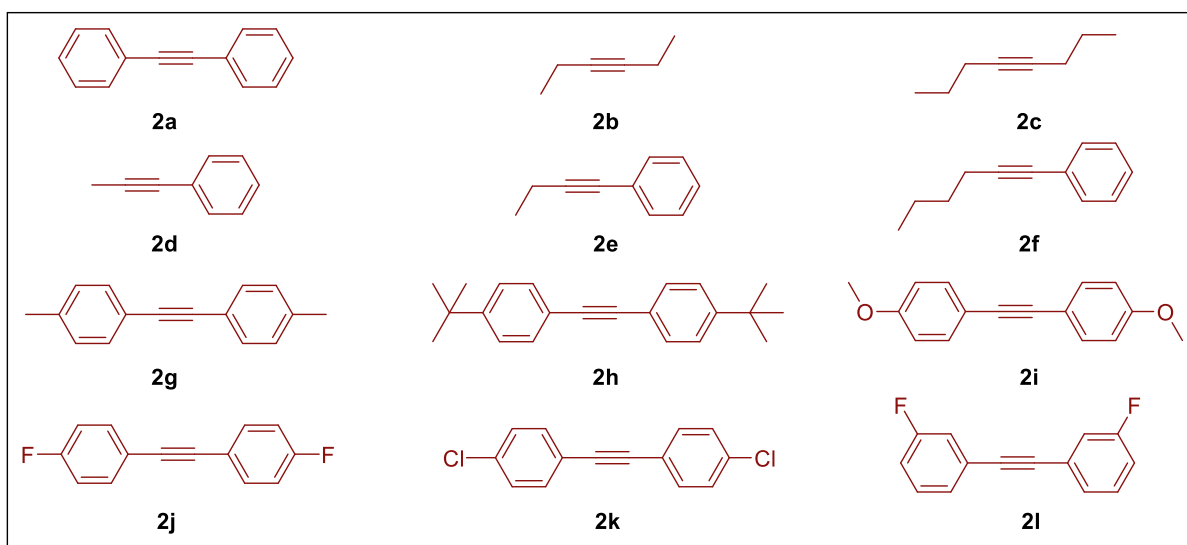

Alkynes **2a**, **2b**, **2c**, **2d**, **2e**, **2f**, **2g**, **2h**, **2i**, **2j**, **2k**, and **2l** were synthesized according to the reported literature procedure<sup>2,3</sup> and spectroscopic data were identical to those.

## 5.1 Experimental characterization data for the benzoyl oximes:

### (*E*)-benzaldehyde *O*-benzoyl oxime (**1a**)

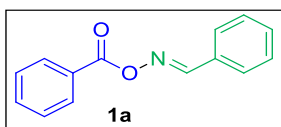

**1a** was prepared according to general procedure A. The crude reaction mixture was purified by column chromatography using silica gel (100-200 mesh) giving **1a** (207 mg) in 92% yield.

**Physical State:** Colorless solid

**m.p.:** 110-112 °C

**R<sub>f</sub>-value:** 0.45 (10% EtOAc/hexane)

**<sup>1</sup>H NMR (400 MHz, CDCl<sub>3</sub>):**  $\delta$  8.29 (s, 1H), 7.90 (d,  $J$  = 7.2 Hz, 2H), 7.56 (d,  $J$  = 6.8 Hz, 2H), 7.32 (t,  $J$  = 7.2 Hz, 1H), 7.22-7.12 (m, 5H).

**<sup>13</sup>C NMR (100 MHz, CDCl<sub>3</sub>):**  $\delta$  163.6, 156.6, 133.2, 131.4, 129.8, 129.4, 128.6, 128.35, 128.31, 128.2.

**IR (KBr, cm<sup>-1</sup>):** 3098, 3068, 2927, 2857, 1736, 1638, 1488, 1447, 1350, 1283, 1217, 1084.

**HRMS (ESI) m/z:** [M+Na]<sup>+</sup> Calcd for C<sub>14</sub>H<sub>11</sub>NaNO<sub>2</sub> 248.0682; Found 248.0682.

**(E)-benzaldehyde O-(4-methylbenzoyl) oxime (1b)**

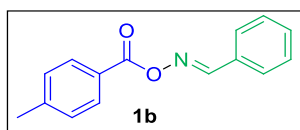

**1b** was prepared according to general procedure A. The crude reaction mixture was purified by column chromatography using silica gel (100-200 mesh) giving **1b** (215 mg) in 90% yield.

**Physical State:** Colorless solid

**m.p.:** 138-140 °C

**R<sub>f</sub>-value:** 0.45 (10% EtOAc/hexane)

**<sup>1</sup>H NMR (400 MHz, CDCl<sub>3</sub>):** δ 8.46 (s, 1H), 7.94 (d, *J* = 8.0 Hz, 2H), 7.72 (d, *J* = 6.8 Hz, 2H), 7.42-7.35 (m, 3H), 7.20 (d, *J* = 8.0 Hz, 2H), 2.34 (s, 3H).

**<sup>13</sup>C NMR (100 MHz, CDCl<sub>3</sub>):** δ 164.3, 156.9, 144.5, 132.0, 130.5, 130.0, 129.6, 129.2, 128.7, 126.1, 22.0.

**IR (KBr, cm<sup>-1</sup>):** 3095, 3079, 3037, 2944 2920, 1730, 1684, 1653, 1625, 1589, 1507, 1465.

**HRMS (ESI) m/z:** [M+Na]<sup>+</sup> Calcd for C<sub>15</sub>H<sub>13</sub>NaNO<sub>2</sub>: 262.0838; Found 262.0851.

**(E)-benzaldehyde O-(4-ethylbenzoyl) oxime (1c)**

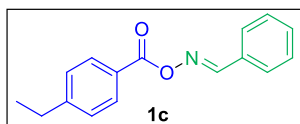

**1c** was prepared according to general procedure A. The crude reaction mixture was purified by column chromatography using silica gel (100-200 mesh) giving **1c** (223 mg) in 88% yield.

**Physical State:** Colorless solid

**m.p.:** 122-124 °C

**R<sub>f</sub>-value:** 0.45 (10% EtOAc/hexane)

**<sup>1</sup>H NMR (700 MHz, CDCl<sub>3</sub>):** δ 8.55 (s, 1H), 8.04 (d, *J* = 8.4 Hz, 2H), 7.82 (d, *J* = 7.7 Hz, 2H), 7.50-7.48 (m, 1H), 7.45 (t, *J* = 7.7 Hz, 2H), 7.32 (d, *J* = 8.4 Hz, 2H), 2.74 (q, *J* = 7.7 Hz, 2H), 1.28 (t, *J* = 7.7 Hz, 3H).

**<sup>13</sup>C NMR (176 MHz, CDCl<sub>3</sub>):** δ 164.2, 156.7, 150.5, 131.8, 130.3, 130.0, 129.0, 128.6, 128.2, 126.1, 29.1, 15.3.

**IR (KBr, cm<sup>-1</sup>):** 3061, 3034, 2972, 2905, 2876, 1732, 1688, 1610, 1572, 1509, 1448.

**HRMS (ESI) m/z:** [M+Na]<sup>+</sup> Calcd for C<sub>16</sub>H<sub>15</sub>NaNO<sub>2</sub>: 276.0995; Found 276.0987.

**(E)-benzaldehyde O-(4-butylbenzoyl) oxime (1d)**

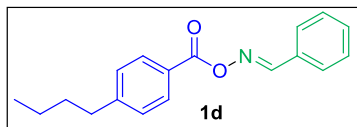

**1d** was prepared according to general procedure A. The crude reaction mixture was purified by column chromatography using silica gel (100-200 mesh) giving **1d** (236 mg) in 84% yield.

**Physical State:** Colorless solid

**m.p.:** 94-96 °C

**R<sub>f</sub>-value:** 0.50 (10% EtOAc/hexane)

**<sup>1</sup>H NMR (400 MHz, CDCl<sub>3</sub>):** δ 8.46 (s, 1H), 7.96 (d, *J* = 8.0 Hz, 2H), 7.73 (d, *J* = 6.4 Hz, 2H), 7.41-7.34 (m, 3H), 7.21 (d, *J* = 8.0 Hz, 2H), 2.60 (t, *J* = 7.6 Hz, 2H), 1.52 (quint, *J* = 7.2 Hz, 2H), 1.33-1.24 (m, 2H), 0.86 (t, *J* = 7.2 Hz, 3H).

**<sup>13</sup>C NMR (100 MHz, CDCl<sub>3</sub>):** δ 164.3, 156.8, 149.4, 132.0, 130.5, 130.1, 129.2, 128.9, 128.8, 126.3, 36.0, 33.5, 22.6, 14.2.

**IR (KBr, cm<sup>-1</sup>):** 3084, 3018, 2957, 2926, 2870, 2846, 1736, 1682, 1653, 1614, 1575, 1506, 1488.

**HRMS (ESI) m/z:** [M+Na]<sup>+</sup> Calcd for C<sub>18</sub>H<sub>19</sub>NaNO<sub>2</sub>: 304.1308; Found 304.1312.

**(E)-benzaldehyde O-(4-(tert-butyl)benzoyl) oxime (1e)**

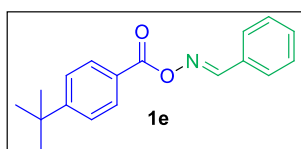

**1e** was prepared according to general procedure A. The crude reaction mixture was purified by column chromatography using silica gel (100-200 mesh) giving **1e** (234 mg) in 83% yield.

**Physical State:** Colorless solid

**m.p.:** 123-125 °C

**R<sub>f</sub>-value:** 0.45 (10% EtOAc/hexane)

**<sup>1</sup>H NMR (400 MHz, CDCl<sub>3</sub>):** δ 8.42 (s, 1H), 7.94 (d, *J* = 8.4 Hz, 2H), 7.67 (d, *J* = 7.2 Hz, 2H), 7.36 (d, *J* = 8.4 Hz, 2H), 7.33-7.27 (m, 3H), 1.21 (s, 9H).

**<sup>13</sup>C NMR (100 MHz, CDCl<sub>3</sub>):** δ 164.0, 157.2, 156.7, 131.8, 130.3, 129.7, 129.0, 128.6, 125.9, 125.6, 35.2, 31.2.

**IR (KBr, cm<sup>-1</sup>):** 3057, 3022, 2963, 2910, 2869, 1735, 1678, 1638, 1610, 1537, 1463.

**HRMS (ESI) m/z:** [M+Na]<sup>+</sup> Calcd for C<sub>18</sub>H<sub>19</sub>NaNO<sub>2</sub>: 304.1308; Found 304.1319.

**(E)-benzaldehyde O-(4-methoxybenzoyl) oxime (1f)**

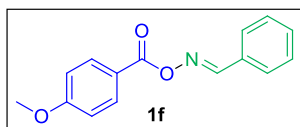

**1f** was prepared according to general procedure A. The crude reaction mixture was purified by column chromatography using silica gel (100-200 mesh) giving **1f** (205 mg) in 91% yield.

**Physical State:** Colorless solid

**m.p.:** 104-106 °C

**R<sub>f</sub>-value:** 0.45 (20% EtOAc/hexane)

**<sup>1</sup>H NMR (400 MHz, CDCl<sub>3</sub>):** δ 8.38 (s, 1H), 7.95 (d, *J* = 8.8 Hz, 2H), 7.66 (d, *J* = 6.8 Hz, 2H), 7.34-7.27 (m, 3H), 6.81 (d, *J* = 8.8 Hz, 2H), 3.70 (s, 3H).

**<sup>13</sup>C NMR (100 MHz, CDCl<sub>3</sub>):** δ 163.9, 163.8, 156.5, 131.9, 131.7, 130.4, 129.0, 128.5, 120.8, 114.0, 55.5.

**IR (KBr, cm<sup>-1</sup>):** 3069, 3021, 2935, 2843, 1727, 1684, 1652, 1604, 1558, 1512, 1455, 1250, 1167.

**HRMS (ESI) m/z:** [M+Na]<sup>+</sup> Calcd for C<sub>15</sub>H<sub>13</sub>NaNO<sub>3</sub>: 278.0788; Found 278.0805.

**(E)-benzaldehyde O-(4-ethoxybenzoyl) oxime (1g)**

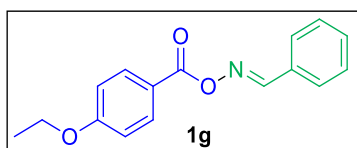

**1g** was prepared according to general procedure A. The crude reaction mixture was purified by column chromatography using silica gel (100-200 mesh) giving **1g** (240 mg) in 89% yield.

**Physical State:** Colorless solid

**m.p.:** 113-115 °C

**R<sub>f</sub>-value:** 0.45 (20% EtOAc/hexane)

**<sup>1</sup>H NMR (400 MHz, CDCl<sub>3</sub>):** δ 8.38 (s, 1H), 7.93 (d, *J* = 8.8 Hz, 2H), 7.66 (d, *J* = 6.8 Hz, 2H), 7.35-7.26 (m, 3H), 6.79 (d, *J* = 8.8 Hz, 2H), 3.93 (q, *J* = 6.8 Hz, 2H), 1.29 (t, *J* = 6.8 Hz, 3H).

**<sup>13</sup>C NMR (100 MHz, CDCl<sub>3</sub>):** δ 163.8, 163.3, 156.5, 131.9, 131.7, 130.4, 129.0, 128.5, 120.6, 114.4, 63.8, 14.7.

**IR (KBr, cm<sup>-1</sup>):** 3097, 3049, 3008, 2982, 2925, 2813, 1733, 1684, 1627, 1608, 1576, 1511, 1449, 1266, 1248.

**HRMS (ESI) m/z:** [M+Na]<sup>+</sup> Calcd for C<sub>16</sub>H<sub>15</sub>NaNO<sub>3</sub> 292.0944; Found 292.0956.

**(E)-benzaldehyde O-(3,5-dimethylbenzoyl) oxime (1h)**

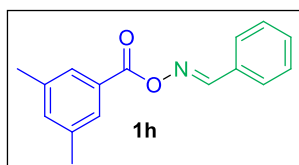

**1h** was prepared according to general procedure A. The crude reaction mixture was purified by column chromatography using silica gel (100-200 mesh), giving **1h** (208 mg) in 82% yield.

**Physical State:** Colorless semi-solid

**m.p.:** 154-157 °C

**R<sub>f</sub>-value:** 0.45 (10% EtOAc/hexane)

**<sup>1</sup>H NMR (400 MHz, CDCl<sub>3</sub>):** δ 8.46 (s, 1H), 7.71 (d, *J* = 7.2 Hz, 2H), 7.65 (s, 2H), 7.41-7.33 (m, 3H), 7.13 (s, 1H), 2.29 (s, 6H).

**<sup>13</sup>C NMR (100 MHz, CDCl<sub>3</sub>):** δ 164.5, 156.9, 138.5, 135.4, 132.0, 130.4, 129.1, 128.76, 128.72, 127.7, 21.4.

**IR (KBr, cm<sup>-1</sup>):** 3065, 3010, 2919, 2863, 1742, 1688, 1609, 1575, 1475, 1447, 1381, 1305, 1191.

**HRMS (ESI) m/z:** [M+Na]<sup>+</sup> Calcd for C<sub>16</sub>H<sub>15</sub>NaNO<sub>2</sub>: 276.0955; Found 276.0985.

**(E)-benzaldehyde O-(3-bromo-4-methylbenzoyl) oxime (1i)**

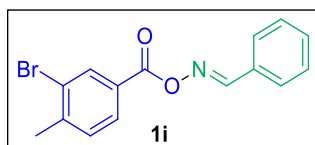

**1i** was prepared according to general procedure A. The crude reaction mixture was purified by column chromatography using silica gel (100-200 mesh) giving **1i** (258 mg) in 81% yield.

**Physical State:** Colorless solid

**m.p.:** 92-94 °C

**R<sub>f</sub>-value:** 0.40 (10% EtOAc/hexane)

**<sup>1</sup>H NMR (400 MHz, CDCl<sub>3</sub>):** δ 8.42 (s, 1H), 8.15 (d, *J* = 1.2 Hz, 1H), 7.83 (dd, *J* = 8.0, 1.6 Hz, 1H), 7.68 (d, *J* = 7.2 Hz, 2H), 7.39-7.30 (m, 3H), 7.20 (d, *J* = 8.0 Hz, 1H), 2.34 (s, 3H).

**<sup>13</sup>C NMR (100 MHz, CDCl<sub>3</sub>):** δ 162.8, 157.1, 144.1, 133.6, 132.0, 131.1, 130.1, 129.1, 128.7, 128.0, 125.1, 23.4.

**IR (KBr, cm<sup>-1</sup>):** 3097, 3077, 3049, 2996, 2918, 2847, 1751, 1686, 1624, 1603, 1556, 1485, 1384, 1279.

**HRMS (ESI) m/z:** [M+Na]<sup>+</sup> Calcd for C<sub>15</sub>H<sub>12</sub>BrNaNO<sub>2</sub> 339.9944; Found 339.9931.

**(E)-benzaldehyde O-(3,4-dimethoxybenzoyl) oxime (1j)**

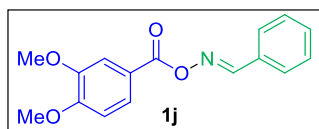

**1j** was prepared according to general procedure A. The crude reaction mixture was purified by column chromatography using silica gel (100-200 mesh) giving **1j** (248 mg) in 87% yield.

**Physical State:** Colorless solid

**m.p.:** 99-101 °C

**R<sub>f</sub>-value:** 0.40 (30% EtOAc/hexane)

**<sup>1</sup>H NMR (400 MHz, CDCl<sub>3</sub>):** δ 8.41 (s, 1H), 7.66-7.61 (m, 3H), 7.47 (d, *J* = 1.6 Hz, 1H), 7.36-7.27 (m, 3H), 6.77 (d, *J* = 8.8 Hz, 1H), 3.80 (s, 3H), 3.79 (s, 3H).

**<sup>13</sup>C NMR (100 MHz, CDCl<sub>3</sub>):** δ 163.7, 156.5, 153.4, 148.8, 131.7, 130.2, 128.9, 128.4, 123.8, 120.8, 112.1, 110.4, 56.0.

**IR (KBr, cm<sup>-1</sup>):** 3086, 3065, 3005, 2964, 2934, 2834, 1736, 1598, 1514, 1462, 1417, 1345, 1270, 1213, 1172.

**HRMS (ESI) m/z:** [M+Na]<sup>+</sup> Calcd for C<sub>16</sub>H<sub>15</sub>NaNO<sub>4</sub>: 308.0893; Found 308.0899.

**(E)-benzaldehyde O-(benzo[d][1,3]dioxole-5-carbonyl) oxime (1k)**

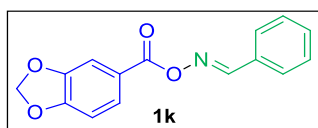

**1k** was prepared according to general procedure A. The crude reaction mixture was purified by column chromatography using silica gel (100-200 mesh) giving **1k** (226 mg) in 84% yield.

**Physical State:** Colorless solid

**m.p.:** 128-130 °C

**R<sub>f</sub>-value:** 0.44 (20% EtOAc/hexane)

**<sup>1</sup>H NMR (400 MHz, CDCl<sub>3</sub>):** δ 8.51 (s, 1H), 7.80 (dd, *J* = 8.0, 1.2 Hz, 2H), 7.75 (dd, *J* = 8.4, 2.0 Hz, 1H), 7.55 (d, *J* = 1.6 Hz, 1), 7.50-7.43 (m, 3H), 6.89 (d, *J* = 8.4 Hz, 1H), 6.07 (s, 2H).

**<sup>13</sup>C NMR (176 MHz, CDCl<sub>3</sub>):** δ 163.5, 156.6, 152.2, 148.0, 131.8, 130.3, 129.0, 128.6, 125.7, 122.4, 109.6, 108.3, 102.1.

**IR (KBr, cm<sup>-1</sup>):** 3078, 3056, 3011, 2904, 2843, 1729, 1683, 1653, 1607, 1559, 1503, 1365, 1263, 1216, 1151.

**HRMS (ESI) m/z:** [M+Na]<sup>+</sup> Calcd for C<sub>15</sub>H<sub>11</sub>NaNO<sub>4</sub>: 292.0580; Found 292.0581.

**(E)-benzaldehyde O-(1-naphthoyl) oxime (1l)**

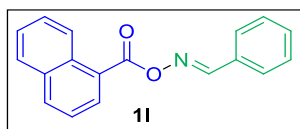

**1l** was prepared according to general procedure A. The crude reaction mixture was purified by column chromatography using silica gel (100-200 mesh) giving **1l** (223 mg) in 81% yield.

**Physical State:** Colorless solid

**m.p.:** 69-71 °C

**R<sub>f</sub>-value:** 0.40 (10% EtOAc/hexane)

**<sup>1</sup>H NMR (400 MHz, CDCl<sub>3</sub>):** δ 8.76 (d, *J* = 8.8 Hz, 1H), 8.38 (s, 1H), 8.05 (dd, *J* = 7.6, 0.8 Hz, 1H), 7.87 (d, *J* = 8.4 Hz, 1H), 7.72 (d, *J* = 8.0 Hz, 1H), 7.66 (dd, *J* = 6.8, 1.2 Hz, 2H), 7.48 (td, *J* = 7.6, 1.2 Hz, 1H), 7.39 (d, *J* = 0.8 Hz, 1H), 7.37-7.35 (m, 4H).

**<sup>13</sup>C NMR (100 MHz, CDCl<sub>3</sub>):** δ 165.0, 157.0, 134.0, 133.9, 131.9, 131.5, 130.3, 130.1, 129.1, 128.8, 128.6, 128.2, 126.6, 125.8, 125.7, 124.6.

**IR (KBr, cm<sup>-1</sup>):** 3054, 3032, 3001, 2934, 2906, 2853, 2810, 1732, 1652, 1613, 1574, 1509, 1461, 1371.

**HRMS (ESI) m/z:** [M+Na]<sup>+</sup> Calcd for C<sub>18</sub>H<sub>13</sub>NaNO<sub>2</sub>: 298.0838; Found 298.0843.

**(E)-benzaldehyde O-(4-fluorobenzoyl) oxime (1m)**

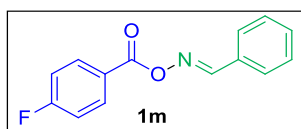

**1m** was prepared according to general procedure A. The crude reaction mixture was purified by column chromatography using silica gel (100-200 mesh) giving **1m** (195 mg) in 80% yield.

**Physical State:** Colorless solid

**m.p.:** 117-119 °C

**R<sub>f</sub>-value:** 0.40 (10% EtOAc/hexane)

**<sup>1</sup>H NMR (400 MHz, CDCl<sub>3</sub>):** δ 8.45 (s, 1H), 8.06 (td, *J* = 7.2, 1.2 Hz, 2H), 7.71 (d, *J* = 6.8 Hz, 2H), 7.42-7.33 (m, 3H), 7.07 (td, *J* = 8.8, 2.0 Hz, 2H).

**<sup>13</sup>C NMR (100 MHz, CDCl<sub>3</sub>):** δ 166.2 (d, *J*<sub>C-F</sub> = 254 Hz), 163.2, 157.1, 132.6 (d, *J*<sub>C-F</sub> = 10 Hz), 132.1, 130.0, 129.2, 128.8, 125.1 (d, *J*<sub>C-F</sub> = 3 Hz), 116.1 (d, *J*<sub>C-F</sub> = 22 Hz).

**IR (KBr, cm<sup>-1</sup>):** 3117, 3098, 3048, 3016, 1741, 1684, 1625, 1589, 1506, 1474, 1408, 1351, 1293.

**HRMS (ESI) m/z:** [M+Na]<sup>+</sup> Calcd for C<sub>14</sub>H<sub>10</sub>FNANO<sub>2</sub>: 266.0588; Found 266.0587.

**(E)-benzaldehyde O-(4-chlorobenzoyl) oxime (1n)**

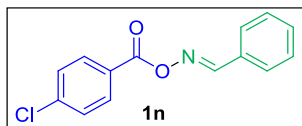

**1n** was prepared according to general procedure A. The crude reaction mixture was purified by column chromatography using silica gel (100-200 mesh) giving **1n** (216 mg) in 83% yield.

**Physical State:** Colorless solid

**m.p.:** 125-127 °C

**R<sub>f</sub>-value:** 0.40 (10% EtOAc/hexane)

**<sup>1</sup>H NMR (400 MHz, CDCl<sub>3</sub>):** δ 8.44 (s, 1H), 7.96 (d, *J* = 8.8 Hz, 2H), 7.70 (d, *J* = 7.2 Hz, 2H), 7.42-7.33 (m, 5H).

**<sup>13</sup>C NMR (100 MHz, CDCl<sub>3</sub>):** δ 163.3, 157.2, 140.2, 132.1, 131.3, 130.2, 129.2, 128.7, 127.3.

**IR (KBr, cm<sup>-1</sup>):** 3101, 3077, 3052, 3013, 2945, 2916, 1742, 1630, 1607, 1580, 1530, 1469, 1399, 1351, 1295.

**HRMS (ESI) m/z:** [M+Na]<sup>+</sup> Calcd for C<sub>14</sub>H<sub>10</sub>ClNaNO<sub>2</sub> 282.0292; Found 282.0296.

**(E)-benzaldehyde O-(4-bromobenzoyl) oxime (1o)**

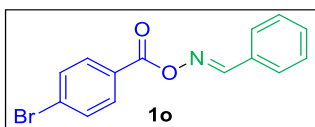

**1o** was prepared according to general procedure A. The crude reaction mixture was purified by column chromatography using silica gel (100-200 mesh) giving **1o** (237 mg) in 78% yield.

**Physical State:** Colorless solid

**m.p.:** 132-134 °C

**R<sub>f</sub>-value:** 0.40 (10% EtOAc/hexane)

**<sup>1</sup>H NMR (400 MHz, CDCl<sub>3</sub>):** δ 8.44 (s, 1H), 7.87 (d, *J* = 8.4 Hz, 2H), 7.69 (d, *J* = 6.8 Hz, 2H), 7.51 (d, *J* = 8.4 Hz, 2H), 7.41-7.32 (m, 3H).

**<sup>13</sup>C NMR (100 MHz, CDCl<sub>3</sub>):** δ 163.4, 157.2, 132.19, 132.15, 131.4, 130.1, 129.2, 128.8, 128.7, 127.7.

**IR (KBr, cm<sup>-1</sup>):** 3087, 3064, 3028, 2948, 2917, 1746, 1651, 1613, 1572, 1536, 1483, 1398, 1356, 1296.

**HRMS (ESI) m/z:** [M+Na]<sup>+</sup> Calcd for C<sub>14</sub>H<sub>10</sub>BrNaNO<sub>2</sub> 325.9787; Found 325.9785.

**(E)-benzaldehyde O-(4-iodobenzoyl) oxime (1p)**

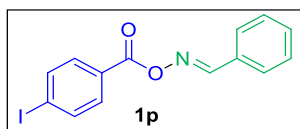

**1p** was prepared according to general procedure A. The crude reaction mixture was purified by column chromatography using silica gel (100-200 mesh) giving **1p** (253 mg) in 72% yield.

**Physical State:** Colorless solid

**m.p.:** 140-142 °C

**R<sub>f</sub>-value:** 0.40 (10% EtOAc/hexane)

**<sup>1</sup>H NMR (400 MHz, CDCl<sub>3</sub>):** δ 8.44 (s, 1H), 7.76-7.68 (m, 6H), 7.43-7.32 (m, 3H).

**<sup>13</sup>C NMR (100 MHz, CDCl<sub>3</sub>):** δ 163.7, 157.3, 138.2, 132.1, 131.3, 130.2, 129.2, 128.8, 128.3, 101.6.

**IR (KBr, cm<sup>-1</sup>):** 3084, 3058, 3012, 2943, 2917, 2848, 1752, 1683, 1653, 1606, 1576, 1540, 1473, 1457.

**HRMS (ESI) m/z:** [M+Na]<sup>+</sup> Calcd for C<sub>14</sub>H<sub>10</sub>INaNO<sub>2</sub> 373.9648; Found 373.9651.

**(E)-benzaldehyde O-(4-nitrobenzoyl) oxime (1q)**

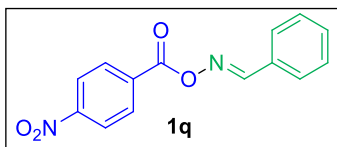

**1q** was prepared according to general procedure A. The crude reaction mixture was purified by column chromatography using silica gel (100-200 mesh) giving **1q** (208 mg) in 77% yield.

**Physical State:** Colorless solid

**m.p.:** 166-168 °C

**R<sub>f</sub>-value:** 0.40 (20% EtOAc/hexane)

**<sup>1</sup>H NMR (400 MHz, CDCl<sub>3</sub>):** δ 8.50 (s, 1H), 8.23 (q, *J* = 9.2 Hz, 4H), 8.72 (d, *J* = 6.8 Hz, 2H), 7.46-7.37 (m, 3H).

**<sup>13</sup>C NMR (100 MHz, CDCl<sub>3</sub>):** δ 162.4, 157.9, 151.0, 134.4, 132.5, 131.1, 129.9, 129.3, 128.9, 124.0.

**IR (KBr, cm<sup>-1</sup>):** 3114, 3077, 3056, 3020, 2986, 2936, 2875, 1729, 1684, 1636, 1576, 1508, 1472, 1457, 1419, 1242.

**HRMS (ESI) m/z:** [M+Na]<sup>+</sup> Calcd for C<sub>14</sub>H<sub>10</sub>NaN<sub>2</sub>O<sub>4</sub> 293.0533; Found 293.0528.

**(E)-benzaldehyde O-(4-(trifluoromethyl)benzoyl) oxime (1r)**

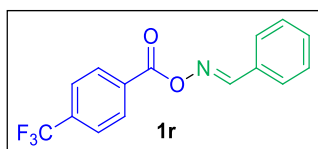

**1r** was prepared according to general procedure A. The crude reaction mixture was purified by column chromatography using silica gel (100-200 mesh) giving **1r** (220 mg) in 75% yield.

**Physical State:** Colorless solid

**m.p.:** 141-143 °C

**R<sub>f</sub>-value:** 0.40 (10% EtOAc/hexane)

**<sup>1</sup>H NMR (400 MHz, CDCl<sub>3</sub>):** δ 8.47 (s, 1H), 8.14 (d, *J* = 8.0 Hz, 2H), 7.71 (d, *J* = 7.6 Hz, 2H), 7.65 (d, *J* = 7.2 Hz, 2H), 7.43-7.34 (m, 3H).

**<sup>13</sup>C NMR (100 MHz, CDCl<sub>3</sub>):** δ 163.0, 157.6, 135.1 (q, *J*<sub>C-F</sub> = 33.0 Hz), 132.3, 132.2, 130.4, 130.1, 129.8, 128.8, 125.8 (q, *J*<sub>C-F</sub> = 4.0 Hz), 123.8 (q, *J*<sub>C-F</sub> = 271.0 Hz).

**IR (KBr, cm<sup>-1</sup>):** 3097, 3054, 3015, 2949, 2924, 1754, 1652, 1621, 1588, 1513, 1470, 1409, 1359, 1297, 1170, 1157.

**HRMS (ESI) m/z:** [M+Na]<sup>+</sup> Calcd for C<sub>15</sub>H<sub>10</sub>F<sub>3</sub>NaNO<sub>2</sub>: 316.0556; Found 316.0563.

**(E)-benzaldehyde O-(3-fluorobenzoyl) oxime (1s)**

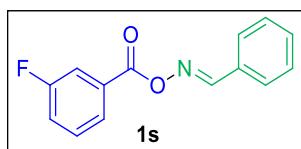

**1s** was prepared according to general procedure A. The crude reaction mixture was purified by column chromatography using silica gel (100-200 mesh) giving **1s** (175 mg) in 72% yield.

**Physical State:** Colorless solid

**m.p.:** 107-109 °C

**R<sub>f</sub>-value:** 0.40 (10% EtOAc/hexane)

**<sup>1</sup>H NMR (400 MHz, CDCl<sub>3</sub>):** δ 8.44 (s, 1H), 7.81 (d, *J* = 7.6 Hz, 1H), 7.69 (d, *J* = 7.2 Hz, 3H), 7.40-7.31 (m, 4H), 7.20 (td, *J* = 8.4, 4.0 Hz, 1H).

**<sup>13</sup>C NMR (100 MHz, CDCl<sub>3</sub>):** δ 163.0 (d, *J*<sub>C-F</sub> = 3 Hz), 162.8 (d, *J*<sub>C-F</sub> = 246 Hz), 157.3, 132.1, 130.9 (d, *J*<sub>C-F</sub> = 7 Hz), 130.5 (d, *J*<sub>C-F</sub> = 8 Hz), 130.1, 129.2, 128.7, 125.7 (d, *J*<sub>C-F</sub> = 3 Hz), 120.2 (d, *J*<sub>C-F</sub> = 21 Hz), 116.8 (d, *J*<sub>C-F</sub> = 23 Hz).

**IR (KBr, cm<sup>-1</sup>):** 3064, 3011, 2917, 2850, 1732, 1614, 1590, 1575, 1484, 1444, 1349, 1286, 1270, 1185, 1057.

**HRMS (ESI) m/z:** [M+Na]<sup>+</sup> Calcd for C<sub>14</sub>H<sub>10</sub>FNANO<sub>2</sub>: 266.0588; Found 266.0593.

**(E)-benzaldehyde O-(3-(trifluoromethyl)benzoyl) oxime (1t)**

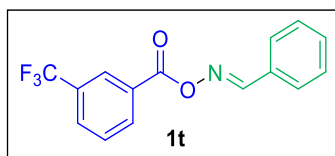

**1t** was prepared according to general procedure A. The crude reaction mixture was purified by column chromatography using silica gel (100-200 mesh) giving **1t** (226 mg) in 77% yield.

**Physical State:** Colorless solid

**m.p.:** 75-77 °C

**R<sub>f</sub>-value:** 0.40 (10% EtOAc/hexane)

**<sup>1</sup>H NMR (400 MHz, CDCl<sub>3</sub>):** δ 8.48 (s, 1H), 8.27 (s, 1H), 8.21 (d, *J* = 7.6 Hz, 1H), 7.75 (d, *J* = 7.6 Hz, 1H), 7.70 (d, *J* = 7.2 Hz, 2H), 7.52 (t, *J* = 8.0 Hz, 1H), 7.41-7.32 (m, 3H).

**<sup>13</sup>C NMR (100 MHz, CDCl<sub>3</sub>):** δ 162.9, 157.6, 133.2, 132.2, 131.5 (q, *J*<sub>C-F</sub> = 33.0 Hz), 130.1 (q, *J*<sub>C-F</sub> = 4.0 Hz), 130.0, 129.8, 129.6, 129.2, 128.8, 126.7 (q, *J*<sub>C-F</sub> = 4.0 Hz), 123.8 (q, *J*<sub>C-F</sub> = 271.0 Hz).

**IR (KBr, cm<sup>-1</sup>):** 3098, 3052, 3027, 2996, 1755, 1616, 1589, 1575, 1488, 1447, 1334, 1296.

**HRMS (ESI) m/z:** [M+Na]<sup>+</sup> Calcd for C<sub>15</sub>H<sub>10</sub>F<sub>3</sub>NaNO<sub>2</sub>: 316.0556; Found 316.0558.

**(E)-benzaldehyde O-furan-3-carbonyl oxime (1u)**

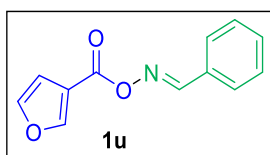

**1u** was prepared according to general procedure A. The crude reaction mixture was purified by column chromatography using silica gel (100-200 mesh) giving **1u** (146 mg) in 68% yield.

**Physical State:** Brown gel

**R<sub>f</sub>-value:** 0.60 (20% EtOAc/hexane)

**<sup>1</sup>H NMR (700 MHz, CDCl<sub>3</sub>):** δ 8.47 (s, 1H), 8.14 (s, 1H), 7.78 (d, *J* = 7.0 Hz, 2H), 7.48-7.47 (m, 2H), 7.43 (t, *J* = 7.7 Hz, 2H), 6.85 (d, *J* = 1.4 Hz, 1H).

**<sup>13</sup>C NMR (100 MHz, CDCl<sub>3</sub>):** δ 160.7, 156.8, 148.4, 144.3, 132.0, 130.3, 129.2, 128.7, 117.6, 110.1.

**IR (KBr, cm<sup>-1</sup>):** 3151, 3134, 3061, 3002, 2956, 2916, 2810, 1754, 1652, 1575, 1507, 1473, 1448.

**HRMS (ESI) m/z:** [M+Na]<sup>+</sup> Calcd for C<sub>12</sub>H<sub>9</sub>NO<sub>3</sub>Na 238.0475; Found 238.0489.

**(E)-benzaldehyde O-thiophene-2-carbonyl oxime (1v)**

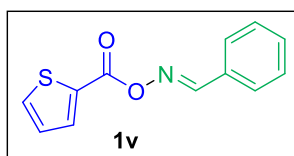

**1v** was prepared according to general procedure A. The crude reaction mixture was purified by column chromatography using silica gel (100-200 mesh) giving **1v** (146 mg) in 63% yield.

**Physical State:** Colorless semi-solid

**R<sub>f</sub>-value:** 0.60 (20% EtOAc/hexane)

**<sup>1</sup>H NMR (700 MHz, CDCl<sub>3</sub>):**  $\delta$  8.51 (s, 1H), 7.94 (dd,  $J$  = 3.5, 1.4 Hz, 1H), 7.79 (d,  $J$  = 7.0 Hz, 2H), 7.63 (dd,  $J$  = 4.9, 1.4 Hz, 1H), 7.48 (t,  $J$  = 7.7 Hz, 1H), 7.44 (t,  $J$  = 7.7 Hz, 2H), 7.15 (t,  $J$  = 4.2 Hz, 1H).

**<sup>13</sup>C NMR (176 MHz, CDCl<sub>3</sub>):**  $\delta$  159.9, 156.9, 134.6, 133.4, 132.1, 131.4, 130.2, 129.2, 128.8, 128.2.

**IR (KBr, cm<sup>-1</sup>):** 3123, 3048, 2942, 2860, 1721, 1671, 1626, 1574, 1522, 1446, 1414, 1358, 1256.

**HRMS (ESI) m/z:** [M+Na]<sup>+</sup> Calcd for C<sub>12</sub>H<sub>9</sub>NO<sub>2</sub>SNa 254.0252; Found 254.0254.

**(E)-1-phenylethan-1-one O-benzoyl oxime (4a)**

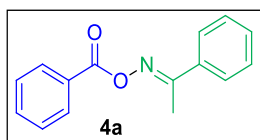

**4a** was prepared according to general procedure C. The crude reaction mixture was purified by column chromatography using silica gel (100-200 mesh) giving **4a** (187 mg) in 78 % yield.

**Physical State:** white solid, **m.p.:** 103-105 °C.

**R<sub>f</sub>-value:** 0.50 (15% EtOAc/hexane).

**<sup>1</sup>H NMR (400 MHz, CDCl<sub>3</sub>):**  $\delta$  8.14 (d,  $J$  = 7.2 Hz, 2H), 7.83 (dd,  $J$  = 8.0, 1.6 Hz, 2H), 7.62 (tt,  $J$  = 7.2, 1.2 Hz, 1H), 7.52-7.41 (m, 5H), 2.53 (s, 3H).

**<sup>13</sup>C NMR (100 MHz, CDCl<sub>3</sub>):**  $\delta$  164.1, 163.9, 135.1, 133.6, 131.0, 129.9, 129.4, 128.93, 128.91, 127.4, 15.0.

**IR (KBr, cm<sup>-1</sup>):** 3058, 2956, 2919, 2850, 1741, 1598, 1449, 1374, 1240, 1175.

**HRMS (ESI) m/z:** [M+Na]<sup>+</sup> Calcd for C<sub>15</sub>H<sub>13</sub>NO<sub>2</sub>Na: 262.0844; Found 262.0854.

**(E)-1-(4-methoxyphenyl)ethanone *O*-benzoyl oxime (4b)**

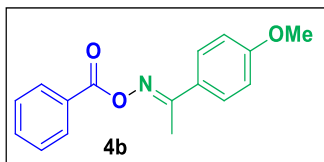

**4b** was prepared according to general procedure C. The crude reaction mixture was purified by column chromatography using silica gel (100-200 mesh) giving **4b** (199 mg) in 74 % yield.

**Physical State:** white flake solid, **m.p.:** 111-114 °C.

**R<sub>f</sub>-value:** 0.40 (15% EtOAc/hexane).

**<sup>1</sup>H NMR (400 MHz, CDCl<sub>3</sub>):** δ 8.13 (d, *J* = 7.2 Hz, 2H), 7.80 (d, *J* = 8.8 Hz, 2H), 7.61 (t, *J* = 7.2 Hz, 1H), 7.49 (t, *J* = 8.0 Hz, 2H), 6.94 (d, *J* = 6.8 Hz, 2H), 3.85 (s, 3H), 2.49 (s, 3H).

**<sup>13</sup>C NMR (176 MHz, CDCl<sub>3</sub>):** δ 164.2, 163.3, 162.0, 133.5, 129.9, 129.7, 129.0, 128.9, 127.4, 114.2, 55.7, 14.7.

**IR (KBr, cm<sup>-1</sup>):** 3008, 2969, 2933, 2838, 1729, 1594, 1448, 1248, 1176, 1092.

**HRMS (ESI) m/z:** [M+Na]<sup>+</sup> Calcd for C<sub>16</sub>H<sub>15</sub>NO<sub>3</sub>Na: 292.0950; Found 292.0970.

**(E)-1-(3,4-dimethoxyphenyl)ethanone *O*-benzoyl oxime (4c)**

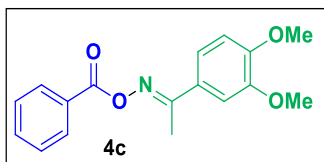

**4c** was prepared according to general procedure C. The crude reaction mixture was purified by column chromatography using silica gel (100-200 mesh) giving **4c** (165 mg) in 55 % yield.

**Physical State:** pale yellow solid, **m.p.:** 125-127 °C.

**R<sub>f</sub>-value:** 0.40 (30% EtOAc/hexane).

**<sup>1</sup>H NMR (400 MHz, CDCl<sub>3</sub>):** δ 8.13 (dd, *J* = 7.2, 1.2 Hz, 2H), 7.62 (tt, *J* = 7.2, 1.2 Hz, 1H), 7.50 (t, *J* = 7.6 Hz, 3H), 7.32 (dd, *J* = 8.4, 2.4 Hz, 1H), 6.89 (d, *J* = 8.4 Hz, 1H), 3.96 (s, 3H), 3.92 (s, 3H), 2.50 (s, 3H).

**<sup>13</sup>C NMR (100 MHz, CDCl<sub>3</sub>):** δ 164.2, 163.4, 151.6, 149.2, 133.6, 129.9, 129.5, 128.9, 127.6, 121.0, 110.7, 109.7, 56.3, 56.2, 14.7.

**IR (KBr, cm<sup>-1</sup>):** 3064, 3005, 2956, 2837, 1731, 1597, 1516, 1444, 1338, 1269, 1172, 1077.

**HRMS (ESI) m/z:** [M+Na]<sup>+</sup> Calcd for C<sub>17</sub>H<sub>17</sub>NO<sub>4</sub>Na: 322.1055; Found 322.1076.

**(E)-1-(benzo[d][1,3]dioxol-5-yl)ethanone *O*-benzoyl oxime (4d)**

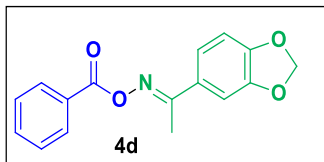

**4d** was prepared according to general procedure C. The crude reaction mixture was purified by column chromatography using silica gel (100-200 mesh) giving **4d** (235 mg) in 83 % yield.

**Physical State:** white solid, **m.p.:** 133-135 °C.

**R<sub>f</sub>-value:** 0.55 (15% EtOAc/hexane).

**<sup>1</sup>H NMR (400 MHz, CDCl<sub>3</sub>):** δ 8.12 (d, *J* = 7.2 Hz, 2H), 7.61 (t, *J* = 7.6 Hz, 1H), 7.49 (t, *J* = 7.6 Hz, 2H), 7.41 (s, 1H), 7.30 (d, *J* = 8.0 Hz, 1H), 6.84 (d, *J* = 8.4 Hz, 1H), 6.01 (s, 2H), 2.47 (s, 3H).

**<sup>13</sup>C NMR (176 MHz, CDCl<sub>3</sub>):** δ 164.1, 163.2, 150.2, 148.4, 133.6, 129.9, 129.6, 129.1, 128.9, 122.2, 120.6, 108.4, 108.3, 107.5, 106.5, 101.9, 101.6, 14.9.

**IR (KBr, cm<sup>-1</sup>):** 3058, 2895, 2792, 1728, 1589, 1504, 1313, 1227.

**HRMS (ESI) m/z:** [M+Na]<sup>+</sup> Calcd for C<sub>16</sub>H<sub>13</sub>NO<sub>4</sub>Na: 306.0742; Found 306.0767.

**(E)-1-(4-(trifluoromethyl)phenyl)ethanone *O*-benzoyl oxime (4e)**

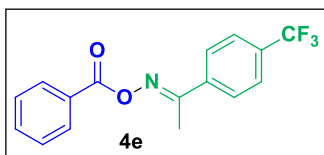

**4e** was prepared according to general procedure C. The crude reaction mixture was purified by column chromatography using silica gel (100-200 mesh) giving **4e** (187 mg) in 61% yield.

**Physical State:** white solid, **m.p.:** 121-123 °C,

**R<sub>f</sub>-value:** 0.50 (15% EtOAc/hexane).

**<sup>1</sup>H NMR (400 MHz, CDCl<sub>3</sub>):** δ 8.14 (dd, *J* = 8.0, 1.2 Hz, 2H), 7.95 (d, *J* = 8.0 Hz, 2H), 7.70 (d, *J* = 8.0 Hz, 2H), 7.62 (d, *J* = 7.6 Hz, 1H), 7.51 (t, *J* = 8.0 Hz, 2H), 2.55 (s, 3H).

**<sup>13</sup>C NMR (176 MHz, CDCl<sub>3</sub>):** δ 163.9, 162.6, 138.5, 133.9, 132.7 (q, *J*<sub>C-F</sub> = 33.0 Hz), 130.0, 129.0, 127.8, 125.9 (q, *J*<sub>C-F</sub> = 4.0 Hz), 125.6 (q, *J*<sub>C-F</sub> = 4.0 Hz), 124.2 (q, *J*<sub>C-F</sub> = 272.3 Hz), 15.0.

**IR (KBr, cm<sup>-1</sup>):** 3071, 2931, 1741, 1619, 1452, 1403, 1327, 1242, 1153, 1112.

**HRMS (ESI) m/z:** [M+H]<sup>+</sup> Calcd for C<sub>16</sub>H<sub>13</sub>F<sub>3</sub>NO<sub>2</sub>: 308.0898; Found 308.0894.

**(E)-1-phenylpropan-1-one O-benzoyl oxime (4f)**

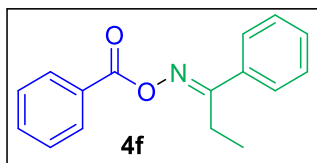

**4f** was prepared according to general procedure C. The crude reaction mixture was purified by column chromatography using silica gel (100-200 mesh) giving **4f** (185 mg) in 73 % yield.

**Physical State:** white solid, **m.p:** 105-107 °C.

**R<sub>f</sub>**-value: 0.50 (15% EtOAc/hexane).

**<sup>1</sup>H NMR (400 MHz, CDCl<sub>3</sub>):** δ 8.12 (d, *J* = 6.8 Hz, 2H), 7.79 (d, *J* = 6.4 Hz, 2H), 7.61 (t, *J* = 7.6 Hz, 1H), 7.49 (t, *J* = 8.0 Hz, 2H), 7.46-7.40 (m, 3H), 2.98 (q, *J* = 7.6 Hz, 2H), 1.29 (t, *J* = 8.0 Hz, 3H).

**<sup>13</sup>C NMR (176 MHz, CDCl<sub>3</sub>):** δ 168.6, 164.0, 133.9, 133.4, 130.7, 129.7, 129.3, 128.8, 128.7, 127.4, 22.3, 11.5.

**IR (KBr, cm<sup>-1</sup>):** 3056, 2958, 2922, 2851, 1742, 1599, 1447, 1373, 1241, 1176.

**HRMS (ESI) m/z:** [M+Na]<sup>+</sup> Calcd for C<sub>16</sub>H<sub>15</sub>NO<sub>2</sub>Na: 276.1000; Found 276.1005.

**(E)-1-phenylbutan-1-one O-benzoyl oxime (4g)**

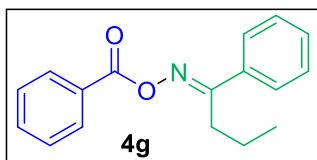

**4g** was prepared according to general procedure C. The crude reaction mixture was purified by column chromatography using silica gel (100-200 mesh) giving **4g** (187 mg) in 70 % yield.

**Physical State:** white solid, **m.p:** 106-108 °C.

**R<sub>f</sub>**-value: 0.50 (15% EtOAc/hexane).

**<sup>1</sup>H NMR (400 MHz, CDCl<sub>3</sub>):** δ 8.11 (d, *J* = 6.8 Hz, 2H), 7.78 (d, *J* = 6.4 Hz, 2H), 7.61 (t, *J* = 7.2 Hz, 1H), 7.49 (t, *J* = 8.0 Hz, 2H), 7.45-7.40 (m, 3H), 2.96 (t, *J* = 7.6 Hz, 2H), 1.70 (sextet, *J* = 7.6 Hz, 2H), 1.03 (t, *J* = 7.6 Hz, 3H).

**<sup>13</sup>C NMR (176 MHz, CDCl<sub>3</sub>):** δ 167.5, 164.0, 134.2, 133.4, 130.7, 129.7, 129.3, 128.77, 128.75, 127.5, 30.6, 20.4, 14.4. **IR (KBr, cm<sup>-1</sup>):** 3058, 2959, 2923, 2852, 1741, 1596, 1446, 1374, 1243, 1175.

**HRMS (ESI) m/z:** [M+Na]<sup>+</sup> Calcd for C<sub>17</sub>H<sub>17</sub>NO<sub>2</sub>Na: 290.1157; Found 290.1165.

#### Ethyl (*E*)-*N*-(benzyloxy)benzimidate (**4h**)

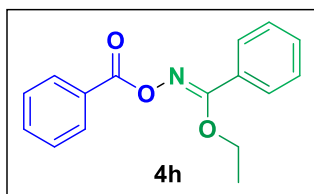

**4h** was prepared according to general procedure C. The crude reaction mixture was purified by column chromatography using silica gel (100-200 mesh) giving **4h** (199 mg) in 74 % yield.

**Physical State:** white solid, **m.p:** 111-113 °C.

**R<sub>f</sub>**-value: 0.50 (15% EtOAc/hexane).

**<sup>1</sup>H NMR (400 MHz, CDCl<sub>3</sub>):** δ 7.92 – 7.84 (m, 2H), 7.69 – 7.62 (m, 2H), 7.55 – 7.42 (m, 4H), 7.38 (t, *J* = 7.8 Hz, 2H), 4.48 (q, *J* = 7.1 Hz, 2H), 1.45 (t, *J* = 7.1 Hz, 3H).

**<sup>13</sup>C NMR (100 MHz, CDCl<sub>3</sub>):** δ 167.30, 164.08, 133.15, 130.96, 129.66, 129.60, 129.04, 128.72, 128.55, 128.27, 64.73, 14.45.

**IR (KBr, cm<sup>-1</sup>):** 3057, 2956, 2921, 2852, 1743, 1598, 1446, 1375, 1242, 1175.

**HRMS (ESI) m/z:** [M+Na]<sup>+</sup> Calcd for C<sub>16</sub>H<sub>16</sub>NO<sub>3</sub>: 270.1130; Found 270.1125.

#### (*E*)-1-(furan-2-yl)ethan-1-one *O*-benzoyl oxime (**4i**)

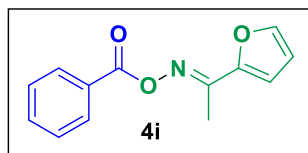

**4i** was prepared according to general procedure C. The crude reaction mixture was purified by column chromatography using silica gel (100-200 mesh) giving **4i** (156 mg) in 68 % yield.

**Physical State:** white solid, **m.p:** 76-78 °C.

**R<sub>f</sub>**-value: 0.45 (20% EtOAc/hexane).

**<sup>1</sup>H NMR (400 MHz, CDCl<sub>3</sub>):** δ 8.15 – 8.05 (m, 2H), 7.64 – 7.53 (m, 2H), 7.54 – 7.42 (m, 2H), 6.98 (d, *J* = 3.5 Hz, 1H), 6.51 (dd, *J* = 3.5, 1.8 Hz, 1H), 2.44 (s, 3H).

**<sup>13</sup>C NMR (100 MHz, CDCl<sub>3</sub>):** δ 163.57, 154.99, 148.35, 145.23, 133.47, 129.75, 129.06, 128.68, 113.53, 111.92, 13.41.

**IR (KBr, cm<sup>-1</sup>):** 3153, 3135, 3058, 3003, 2954, 2914, 2812, 1756, 1653, 1576, 1506, 1474, 1447.

**HRMS (ESI) m/z:** [M+Na]<sup>+</sup> Calcd for C<sub>13</sub>H<sub>11</sub>NO<sub>3</sub>Na: 252.0637; Found 252.0628.

### (*E*)-1-(thiophen-3-yl)ethan-1-one O-benzoyl oxime (**4j**)

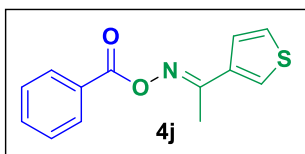

**4j** was prepared according to general procedure C. The crude reaction mixture was purified by column chromatography using silica gel (100-200 mesh) giving **4j** (152 mg) in 62 % yield.

**Physical State:** white solid, **m.p.:** 83-85 °C.

**R<sub>f</sub>-value:** 0.45 (20% EtOAc/hexane).

**<sup>1</sup>H NMR (400 MHz, CDCl<sub>3</sub>):** δ 8.14 – 8.08 (m, 2H), 7.73 (dd, *J* = 3.0, 1.3 Hz, 1H), 7.66 (dd, *J* = 5.1, 1.3 Hz, 1H), 7.64 – 7.57 (m, 1H), 7.49 (t, *J* = 7.8 Hz, 2H), 7.36 (dd, *J* = 5.1, 2.9 Hz, 1H), 2.50 (s, 3H).

**<sup>13</sup>C NMR (100 MHz, CDCl<sub>3</sub>):** δ 163.86, 159.35, 136.91, 133.42, 129.73, 129.28, 128.68, 127.03, 126.55, 125.97, 14.92.

**IR (KBr, cm<sup>-1</sup>):** 3121, 3049, 2944, 2862, 1722, 1673, 1628, 1573, 1525, 1443, 1416, 1356, 1259.

**HRMS (ESI) m/z:** [M+Na]<sup>+</sup> Calcd for C<sub>13</sub>H<sub>11</sub>NO<sub>2</sub>SNa: 268.0408; Found 268.0409.

## 5.2 Experimental characterization data for the compounds

### 3,4-diphenyl-1*H*-isochromen-1-one (**3aa**)

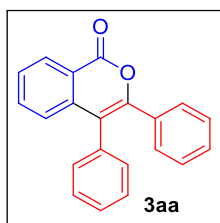

**3aa** was prepared according to general procedure C. The crude reaction mixture was purified by column chromatography using silica gel (100-200 mesh) giving **3aa** (26 mg) in 87 % yield.

**Physical State:** pale yellow solid, **m.p.:** 170-173 °C,

**R<sub>f</sub>-value:** 0.45 (10% EtOAc/hexane).

**<sup>1</sup>H NMR (400 MHz, CDCl<sub>3</sub>):** δ 8.33 (d, *J* = 8.0 Hz, 1H), 7.56 (t, *J* = 7.2 Hz, 1H), 7.45 (t, *J* = 7.2 Hz, 1H), 7.34-7.30 (m, 3H), 7.26 (d, *J* = 8.0 Hz, 2H), 7.19-7.10 (m, 6H).

**<sup>13</sup>C NMR (100 MHz, CDCl<sub>3</sub>):** δ 162.6, 151.2, 139.2, 134.9, 134.6, 133.2, 131.5, 129.9, 129.5, 129.4, 129.2, 128.46, 128.43, 128.2, 125.6, 120.7, 117.2.

**IR (KBr, cm<sup>-1</sup>):** 3074, 3019, 2923, 2852, 1737, 1614, 1559, 1489, 1443, 1317, 1243, 1195.

**HRMS (ESI) m/z:** [M+Na]<sup>+</sup> Calcd for C<sub>21</sub>H<sub>14</sub>NaO<sub>2</sub>: 321.0886; Found 321.0886.

### 6-methyl-3,4-diphenyl-1*H*-isochromen-1-one (3ba)

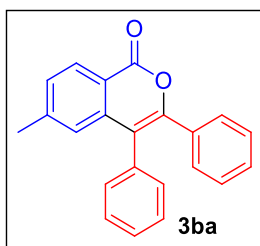

**3ba** was prepared according to general procedure C. The crude reaction mixture was purified by column chromatography using silica gel (100-200 mesh) giving **3ba** (26 mg) in 84% yield.

**Physical State:** colorless solid, **m.p.:** 162-164 °C,

**R<sub>f</sub>-value:** 0.55 (10% EtOAc/hexane).

**<sup>1</sup>H NMR (400 MHz, CDCl<sub>3</sub>):** δ 8.21 (d, *J* = 8.0 Hz, 1H), 7.35-7.32 (m, 3H), 7.24 (td, *J* = 8.0, 0.8 Hz, 3H), 7.18-7.07 (m, 5H), 6.88 (s, 1H), 2.88 (s, 3H).

**<sup>13</sup>C NMR (100 MHz, CDCl<sub>3</sub>):** δ 162.6, 151.3, 146.0, 139.2, 134.7, 133.3, 131.5, 129.9, 129.8, 129.5, 129.3, 129.1, 128.3, 128.1, 125.6, 118.3, 117.1, 22.5.

**IR (KBr, cm<sup>-1</sup>):** 3082, 3053, 2986, 2933, 2875, 1734, 1622, 1574, 1481, 1443, 1209, 1172, 1072.

**HRMS (ESI) m/z:** [M+Na]<sup>+</sup> Calcd for C<sub>22</sub>H<sub>16</sub>NaO<sub>2</sub>: 335.1043; Found 335.1054.

### 6-ethyl-3,4-diphenyl-1*H*-isochromen-1-one (3ca)

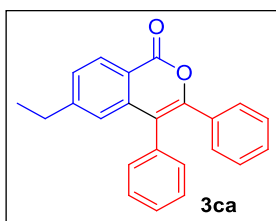

**3ca** was prepared according to general procedure C. The crude reaction mixture was purified by column chromatography using silica gel (100-200 mesh) giving **3ca** (27 mg) in 83 % yield.

**Physical State:** off-white solid, **m.p.:** 153-154 °C,

**R<sub>f</sub>-value:** 0.55 (10% EtOAc/hexane).

**<sup>1</sup>H NMR (400 MHz, CDCl<sub>3</sub>):** δ 8.32 (d, *J* = 8.0 Hz, 1H), 7.43-7.36 (m, 4H), 7.32-7.30 (m, 2H), 7.27-7.24 (m, 3H), 7.22-7.16 (m, 3H), 6.98 (d, *J* = 0.8 Hz, 1H), 2.65 (q, *J* = 7.6 Hz, 2H), 1.18 (t, *J* = 7.6 Hz, 3H).

**<sup>13</sup>C NMR (100 MHz, CDCl<sub>3</sub>):** δ 162.6, 152.2, 151.3, 139.3, 134.8, 133.4, 131.6, 130.0, 129.5, 129.3, 129.1, 128.6, 128.3, 128.1, 124.5, 118.6, 117.3, 29.7, 15.5.

**IR (KBr, cm<sup>-1</sup>):** 3085, 3055, 2981, 2936, 2875, 1733, 1621, 1574, 1485, 1323, 1264, 1172.

**HRMS (ESI) m/z:** [M+Na]<sup>+</sup> Calcd for C<sub>23</sub>H<sub>18</sub>NaO<sub>2</sub>: 349.1205; Found 349.1205.

### 6-butyl-3,4-diphenyl-1*H*-isochromen-1-one (3da)

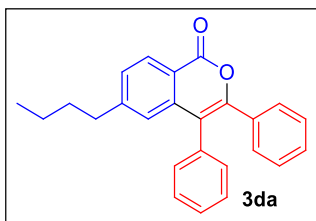

**3da** was prepared according to general procedure C. The crude reaction mixture was purified by column chromatography using silica gel (100-200 mesh) giving **3da** (28 mg) in 79 % yield.

**Physical State:** off-white solid, **m.p.:** 132-134 °C,

**R<sub>f</sub>-value:** 0.65 (10% EtOAc/hexane).

**<sup>1</sup>H NMR (400 MHz, CDCl<sub>3</sub>):** δ 8.24 (d, *J* = 8.0 Hz, 1H), 7.36-7.33 (m, 3H), 7.27 (dd, *J* = 8.0, 1.2 Hz, 1H), 7.23 (dd, *J* = 8.0, 1.2 Hz, 2H), 7.19-7.16 (m, 2H), 7.14-7.08 (m, 3H), 6.88 (s, 1H), 2.53 (t, *J* = 7.6 Hz, 2H), 1.45 (quint, *J* = 7.2 Hz, 2H), 1.27-1.18 (m, 2H), 0.80 (t, *J* = 7.2 Hz, 3H),

**<sup>13</sup>C NMR (100 MHz, CDCl<sub>3</sub>):** δ 162.6, 151.3, 150.9, 139.2, 134.8, 133.4, 131.6, 129.9, 129.5, 129.3, 129.15, 129.10, 128.3, 128.1, 125.0, 118.5, 117.2, 36.4, 33.4, 22.5, 14.1.

**IR (KBr, cm<sup>-1</sup>):** 3062, 3020, 2927, 2855, 1732, 1615, 1573, 1558, 1481, 1442, 1293, 1247.

**HRMS (ESI) m/z:** [M+H]<sup>+</sup> Calcd for C<sub>25</sub>H<sub>23</sub>O<sub>2</sub>: 355.1693; Found 355.1693.

### 6-(tert-butyl)-3,4-diphenyl-1*H*-isochromen-1-one (3ea)

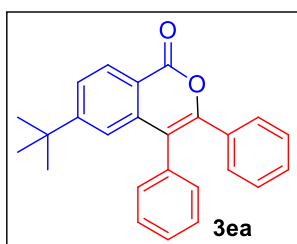

**3ea** was prepared according to general procedure C. The crude reaction mixture was purified by column chromatography using silica gel (100-200 mesh) giving **3ea** (29 mg) in 82% yield.

**Physical State:** light yellow solid, **m.p.:** 161-163 °C,

**R<sub>f</sub>-value:** 0.55 (10% EtOAc/hexane).

**<sup>1</sup>H NMR (400 MHz, CDCl<sub>3</sub>):** δ 8.25 (d, *J* = 8.4 Hz, 1H), 7.50 (dd, *J* = 8.4, 1.6 Hz, 1H), 7.35-7.31 (m, 3H), 7.25 (dd, *J* = 7.6, 0.8 Hz, 2H), 7.19 (dd, *J* = 7.6, 2.4 Hz, 2H), 7.15-7.08 (m, 4H), 1.16 (s, 9H).

**<sup>13</sup>C NMR (100 MHz, CDCl<sub>3</sub>):** δ 162.6, 158.9, 151.2, 139.0, 134.7, 133.4, 131.5, 129.6, 129.5, 129.2, 129.1, 128.3, 128.1, 126.3, 122.0, 118.3, 117.5, 35.8, 31.2.

**IR (KBr, cm<sup>-1</sup>):** 3052, 2967, 2927, 2865, 1728, 1698, 1619, 1574, 1483, 1296, 1252.

**HRMS (ESI) m/z:** [M+H]<sup>+</sup> Calcd for C<sub>25</sub>H<sub>23</sub>O<sub>2</sub>: 355.1693; Found 355.1705.

### 6-methoxy-3,4-diphenyl-1*H*-isochromen-1-one (3fa)

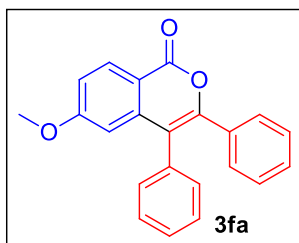

**3fa** was prepared according to general procedure C. The crude reaction mixture was purified by column chromatography using silica gel (100-200 mesh) giving **3fa** (28 mg) in 85% yield.

**Physical State:** light brown solid, **m.p.:** 178-180 °C,

**R<sub>f</sub>-value:** 0.40 (10% EtOAc/hexane).

**<sup>1</sup>H NMR (400 MHz, CDCl<sub>3</sub>):** δ 8.26 (d, *J* = 8.8 Hz, 1H), 7.33-7.31 (m, 3H), 7.24 (d, *J* = 6.8 Hz, 2H), 7.18-7.08 (m, 5H), 6.98 (dd, *J* = 8.4, 2.0 Hz, 1H), 6.50 (d, *J* = 2.0 Hz, 1H), 3.67 (s, 3H).

**<sup>13</sup>C NMR (100 MHz, CDCl<sub>3</sub>):** δ 164.9, 162.3, 151.8, 141.5, 134.7, 133.3, 132.2, 131.5, 129.5, 129.3, 129.2, 128.4, 128.1, 117.1, 115.9, 114.0, 108.8, 55.8.

**IR (KBr, cm<sup>-1</sup>):** 3079, 3054, 2997, 2952, 2847, 1731, 1661, 1574, 1531, 1485, 1262, 1192.

**HRMS (ESI) m/z:** [M+H]<sup>+</sup> Calcd for C<sub>22</sub>H<sub>17</sub>O<sub>3</sub>: 329.1172; Found 329.1172.

### 6-ethoxy-3,4-diphenyl-1*H*-isochromen-1-one (3ga)

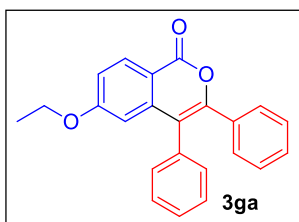

**3ga** was prepared according to general procedure C. The crude reaction mixture was purified by column chromatography using silica gel (100-200 mesh) giving **3ga** (28 mg) in 81 % yield.

**Physical State:** off white solid, **m.p.:** 171-173 °C,

**R<sub>f</sub>-value:** 0.40 (10% EtOAc/hexane).

**<sup>1</sup>H NMR (400 MHz, CDCl<sub>3</sub>):** δ 8.25 (d, *J* = 8.8 Hz, 1H), 7.33-7.31 (m, 3H), 7.24 (d, *J* = 7.6 Hz, 2H), 7.18-7.08 (m, 5H), 6.96 (dd, *J* = 8.8, 2.0 Hz, 1H), 6.48 (d, *J* = 2.0 Hz, 1H), 3.88 (q, *J* = 7.2 Hz, 2H), 1.28 (t, *J* = 6.8 Hz, 3H).

**<sup>13</sup>C NMR (100 MHz, CDCl<sub>3</sub>):** δ 164.3, 162.3, 151.7, 141.4, 134.7, 133.3, 132.2, 131.5, 129.5, 129.3, 129.2, 128.4, 128.1, 117.1, 116.2, 113.8, 109.3, 64.1, 14.8.

**IR (KBr, cm<sup>-1</sup>):** 3073, 3022, 2970, 2927, 2849, 1741, 1698, 1650, 1605, 1538, 1485, 1202.

**HRMS (ESI) m/z:** [M+H]<sup>+</sup> Calcd for C<sub>23</sub>H<sub>19</sub>O<sub>3</sub>: 343.1329; Found 343.1322.

### 5,7-dimethyl-3,4-diphenyl-1*H*-isochromen-1-one (**3ha**)

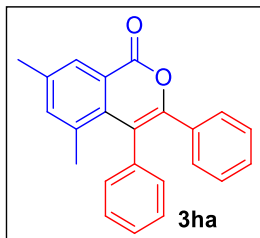

**3ha** was prepared according to general procedure C. The crude reaction mixture was purified by column chromatography using silica gel (100-200 mesh) giving **3ha** (23 mg) in 70% yield.

**Physical State:** pale yellow solid, **m.p.:** 165-167 °C,

**R<sub>f</sub>-value:** 0.50 (10% EtOAc/hexane).

**<sup>1</sup>H NMR (400 MHz, CDCl<sub>3</sub>):** δ 8.10 (s, 1H), 7.22-7.18 (m, 4H), 7.15-7.06 (m, 7H), 2.35 (s, 3H), 1.64 (s, 3H).

**<sup>13</sup>C NMR (100 MHz, CDCl<sub>3</sub>):** δ 163.3, 151.0, 140.7, 138.5, 137.6, 135.8, 134.1, 133.8, 132.1, 129.8, 128.6, 128.5, 128.1, 127.9, 121.9, 117.6, 23.5, 21.2.

**IR (KBr, cm<sup>-1</sup>):** 3078, 3051, 2977, 2851, 1733, 1682, 1650, 1634, 1575, 1488, 1267, 1216.

**HRMS (ESI) m/z:** [M+H]<sup>+</sup> Calcd for C<sub>23</sub>H<sub>19</sub>O<sub>2</sub>: 327.1380; Found 327.1370.

### 7-bromo-6-methyl-3,4-diphenyl-1*H*-isochromen-1-one (**3ia**)

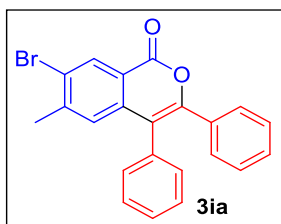

**3ia** was prepared according to general procedure C. The crude reaction mixture was purified by column chromatography using silica gel (100-200 mesh) giving **3ia** (26 mg) in 67 % yield.

**Physical State:** white solid, **m.p.:** 207-209 °C,

**R<sub>f</sub>-value:** 0.55 (10% EtOAc/hexane).

**<sup>1</sup>H NMR (400 MHz, CDCl<sub>3</sub>):** δ 8.47 (s, 1H), 7.36-7.34 (m, 3H), 7.22 (d, *J* = 6.8 Hz, 2H), 7.18-7.08 (m, 6H), 6.94 (s, 1H), 2.32 (s, 3H).

**<sup>13</sup>C NMR (100 MHz, CDCl<sub>3</sub>):** δ 161.3, 151.7, 145.8, 138.1, 134.2, 133.2, 133.0, 131.4, 129.5, 129.4, 128.6, 128.2, 127.4, 125.1, 119.9, 116.6, 24.1.

**IR (KBr, cm<sup>-1</sup>):** 3053, 3024, 2924, 2852, 1734, 1695, 1652, 1627, 1576, 1489, 1264.

**HRMS (ESI) m/z:** [M+H]<sup>+</sup> Calcd for C<sub>22</sub>H<sub>16</sub>BrO<sub>2</sub>: 391.0328; Found 391.0344.

### 6,7-dimethoxy-3,4-diphenyl-1*H*-isochromen-1-one (3ja)

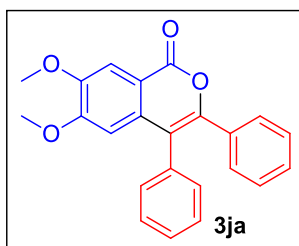

**3ja** was prepared according to general procedure C. The crude reaction mixture was purified by column chromatography using silica gel (100-200 mesh) giving **3ja** (29 mg) in 80% yield.

**Physical State:** brown solid, **m.p.:** 197-199 °C,

**R<sub>f</sub>-value:** 0.45 (30% EtOAc/hexane).

**<sup>1</sup>H NMR (400 MHz, CDCl<sub>3</sub>):** δ 7.70 (s, 1H), 7.37-7.33 (m, 3H), 7.24-7.19 (m, 4H), 7.14-7.08 (m, 3H), 6.48 (s, 1H), 3.94 (s, 3H),

3.66 (s, 3H).

**<sup>13</sup>C NMR (100 MHz, CDCl<sub>3</sub>):** δ 162.4, 155.2, 150.4, 149.9, 134.9, 134.8, 133.3, 131.4, 129.44, 129.40, 129.0, 128.4, 128.1, 117.0, 114.0, 109.7, 106.5, 56.71, 56.27.

**IR (KBr, cm<sup>-1</sup>):** 3092, 3056, 2964, 2856, 1726, 1607, 1574, 1510, 1463, 1280, 1193.

**HRMS (ESI) m/z:** [M+H]<sup>+</sup> Calcd for C<sub>23</sub>H<sub>19</sub>O<sub>4</sub>: 359.1278; Found 359.1281.

### 8,9-diphenyl-6*H*-[1,3]dioxolo[4,5-*f*]isochromen-6-one (3ka)

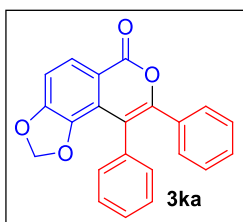

**3ka** was prepared according to general procedure C. The crude reaction mixture was purified by column chromatography using silica gel (100-200 mesh) giving **3ka** (28 mg) in 81 % yield.

**Physical State:** light-brown solid, **m.p.:** 207-210 °C,

**R<sub>f</sub>-value:** 0.45 (30% EtOAc/hexane).

**<sup>1</sup>H NMR (400 MHz, CDCl<sub>3</sub>):** δ 8.08 (d, *J* = 8.4 Hz, 1H), 7.32-7.25 (m, 8H), 7.21-7.13 (m, 3H), 7.02 (d, *J* = 8.4 Hz, 1H), 5.81 (s, 2H).

**<sup>13</sup>C NMR (100 MHz, CDCl<sub>3</sub>):** δ 161.9, 153.5, 151.5, 142.9, 135.3, 133.2, 131.4, 129.6, 129.1, 128.3, 128.1, 128.0, 126.5, 122.2, 115.2, 113.7, 109.8, 102.3.

**IR (KBr, cm<sup>-1</sup>):** 3087, 3031, 2919, 2834, 1739, 1698, 1614, 1574, 1493, 1456, 1275, 1223.

**HRMS (ESI) m/z:** [M+Na]<sup>+</sup> Calcd for C<sub>22</sub>H<sub>14</sub>NaO<sub>4</sub>: 365.0790; Found 365.0804.

### 3,4-diphenyl-1*H*-benzo[*h*]isochromen-1-one (3la)

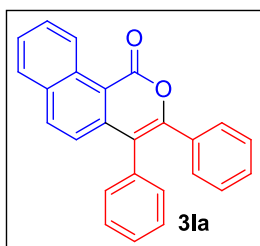

**3la** was prepared according to general procedure C. The crude reaction mixture was purified by column chromatography using silica gel (100-200 mesh) giving **3la** (26 mg) in 75% yield.

**Physical State:** pale yellow solid, **m.p.:** 170-172 °C,

**R<sub>f</sub>-value:** 0.50 (10% EtOAc/hexane).

**<sup>1</sup>H NMR (400 MHz, CDCl<sub>3</sub>):** δ 9.77 (d, *J* = 8.8 Hz, 1H), 7.92 (d, *J* = 9.2 Hz, 1H), 7.79 (d, *J* = 8.0 Hz, 1H), 7.71 (td, *J* = 7.2, 1.2 Hz, 1H), 7.55 (t, *J* = 7.2 Hz, 1H), 7.40-7.36 (m, 3H), 7.30 (d, *J* = 6.8 Hz, 2H), 7.23-7.20 (m, 2H), 7.18-7.10 (m, 4H).

**<sup>13</sup>C NMR (100 MHz, CDCl<sub>3</sub>):** δ 161.7, 152.8, 141.1, 136.2, 135.1, 133.1, 132.9, 131.9, 131.8, 129.8, 129.56, 129.51, 129.4, 128.8, 128.5, 128.2, 127.4, 123.0, 117.6, 114.3.

**IR (KBr, cm<sup>-1</sup>):** 3132, 3055, 2932, 2834, 1713, 1673, 1611, 1549, 1495, 1445, 1230.

**HRMS (ESI) m/z:** [M+Na]<sup>+</sup> Calcd for C<sub>25</sub>H<sub>16</sub>NaO<sub>2</sub>: 371.1043; Found 371.1055.

### 6-fluoro-3,4-diphenyl-1*H*-isochromen-1-one (3ma)

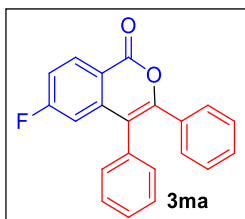

**3ma** was prepared according to general procedure C. The crude reaction mixture was purified by column chromatography using silica gel (100-200 mesh) giving **3ma** (22 mg) in 69 % yield.

**Physical State:** off-white solid, **m.p.:** 130-132 °C,

**R<sub>f</sub>-value:** 0.50 (10% EtOAc/hexane).

**<sup>1</sup>H NMR (400 MHz, CDCl<sub>3</sub>):** δ 8.35 (dd, *J* = 8.8, 5.6 Hz, 1H), 7.38-7.34 (m, 3H), 7.25 (d, *J* = 6.8 Hz, 2H), 7.19-7.10 (m, 6H), 6.76 (dd, *J* = 10.0, 2.4 Hz, 1H).

**<sup>13</sup>C NMR (100 MHz, CDCl<sub>3</sub>):** δ 167.1 (d, *J*<sub>C-F</sub> = 254 Hz), 161.5, 152.3, 142.2 (d, *J*<sub>C-F</sub> = 11 Hz), 134.1, 133.2, 133.1, 132.8, 131.4, 129.6, 129.5, 128.7, 128.2, 117.2 (d, *J*<sub>C-F</sub> = 2 Hz), 116.6 (d, *J*<sub>C-F</sub> = 23 Hz), 116.7 (d, *J*<sub>C-F</sub> = 3 Hz), 111.6 (d, *J*<sub>C-F</sub> = 24 Hz).

**<sup>19</sup>F NMR (376 MHz, CDCl<sub>3</sub>):** δ -101.0.

**IR (KBr, cm<sup>-1</sup>):** 3057, 3024, 2986, 2929, 2851, 1732, 1680, 1626, 1574, 1557, 1472, 1227.

**HRMS (ESI) m/z:** [M+H]<sup>+</sup> Calcd for C<sub>21</sub>H<sub>14</sub>FO<sub>2</sub>: 317.0972; Found 317.0978.

### 6-chloro-3,4-diphenyl-1*H*-isochromen-1-one (3na)

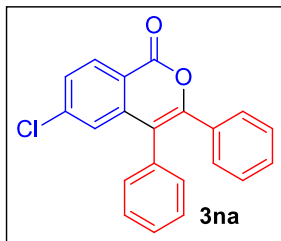

**3na** was prepared according to general procedure C. The crude reaction mixture was purified by column chromatography using silica gel (100-200 mesh) giving **3na** (23 mg) in 70% yield.

**Physical State:** light-brown solid, **m.p.:** 164-166 °C,

**R<sub>f</sub>-value:** 0.50 (10% EtOAc/hexane).

**<sup>1</sup>H NMR (400 MHz, CDCl<sub>3</sub>):** δ 8.25 (d, *J* = 8.4 Hz, 1H), 7.40-7.35 (m, 4H), 7.24 (d, *J* = 7.6 Hz, 2H), 7.17-7.08 (m, 6H).

**<sup>13</sup>C NMR (100 MHz, CDCl<sub>3</sub>):** δ 161.7, 152.5, 141.9, 140.7, 133.9, 132.8, 131.5, 131.4, 129.63, 129.60, 129.5, 128.91, 128.7, 128.2, 125.3, 119.0, 116.3.

**IR (KBr, cm<sup>-1</sup>):** 3058, 3030, 2958, 2851, 1737, 1682, 1633, 1574, 1494, 1262, 1193.

**HRMS (ESI) m/z:** [M+H]<sup>+</sup> Calcd for C<sub>21</sub>H<sub>14</sub>ClO<sub>2</sub>: 333.0677; Found 333.0673.

### 6-bromo-3,4-diphenyl-1*H*-isochromen-1-one (3oa)

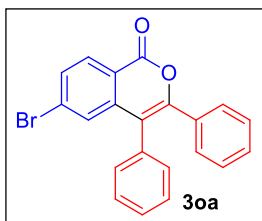

**3oa** was prepared according to general procedure C. The crude reaction mixture was purified by column chromatography using silica gel (100-200 mesh) giving **3oa** (26 mg) in 68 % yield.

**Physical State:** pale yellow solid, **m.p.:** 197-200 °C,

**R<sub>f</sub>-value:** 0.55 (10% EtOAc/hexane).

**<sup>1</sup>H NMR (400 MHz, CDCl<sub>3</sub>):** δ 8.17 (d, *J* = 8.4 Hz, 1H), 7.56 (dd, *J* = 8.4, 1.6 Hz, 1H), 7.37-7.35 (m, 3H), 7.25-7.22 (m, 3H), 7.19-7.09 (m, 5H).

**<sup>13</sup>C NMR (100 MHz, CDCl<sub>3</sub>):** δ 161.9, 152.5, 140.7, 133.9, 132.8, 131.8, 131.5, 131.4, 130.8, 129.64, 129.61, 129.5, 128.8, 128.3, 128.2, 119.4, 116.2.

**IR (KBr, cm<sup>-1</sup>):** 3059, 2988, 2826, 1731, 1673, 1621, 1574, 1444, 1264, 1192.

**HRMS (ESI) m/z:** [M+Na]<sup>+</sup> Calcd for C<sub>21</sub>H<sub>13</sub>BrNaO<sub>2</sub>: 398.9991; Found 399.0004.

### 6-iodo-3,4-diphenyl-1*H*-isochromen-1-one (3pa)

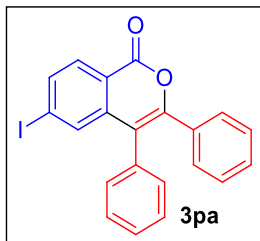

**3pa** was prepared according to general procedure C. The crude reaction mixture was purified by column chromatography using silica gel (100-200 mesh) giving **3pa** (25 mg) in 59% yield.

**Physical State:** off-white solid, **m.p.:** 228-230 °C,

**R<sub>f</sub>-value:** 0.55 (10% EtOAc/hexane).

**<sup>1</sup>H NMR (400 MHz, CDCl<sub>3</sub>):** δ 8.00 (d, *J* = 8.4 Hz, 1H), 7.78 (dd, *J* = 8.4, 1.2 Hz, 1H), 7.47 (d, *J* = 1.2 Hz, 1H), 7.37-7.35 (m, 3H),

7.23 (d, *J* = 7.2 Hz, 2H), 7.18-7.09 (m, 5H).

**<sup>13</sup>C NMR (100 MHz, CDCl<sub>3</sub>):** δ 162.2, 152.4, 140.4, 137.6, 134.5, 133.8, 132.9, 131.4, 131.1, 129.6, 129.5, 128.7, 128.2, 119.9, 116.0, 103.8.

**IR (KBr, cm<sup>-1</sup>):** 3069, 2926, 2855, 1729, 1650, 1581, 1488, 1278, 1190.

**HRMS (ESI) m/z:** [M+H]<sup>+</sup> Calcd for C<sub>21</sub>H<sub>14</sub>IO<sub>2</sub>: 425.0033; Found 425.0028.

### 6-nitro-3,4-diphenyl-1*H*-isochromen-1-one (3qa)

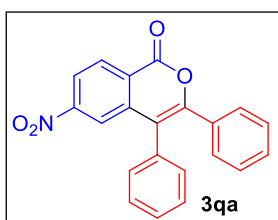

**3qa** was prepared according to general procedure C. The crude reaction mixture was purified by column chromatography using silica gel (100-200 mesh) giving **3qa** (22 mg) in 64 % yield.

**Physical State:** yellow solid, **m.p.:** 155-156 °C,

**R<sub>f</sub>-value:** 0.55 (20% EtOAc/hexane).

**<sup>1</sup>H NMR (700 MHz, CDCl<sub>3</sub>):** δ 8.50 (d, *J* = 9.1 Hz, 1H), 8.20 (dd, *J* = 9.1, 2.1 Hz, 1H), 7.96 (d, *J* = 2.1 Hz, 1H), 7.40-7.39 (m, 3H), 7.27 (d, *J* = 7.0 Hz, 2H), 7.22-7.18 (m, 3H), 7.15 (t, *J* = 7.7 Hz, 2H).

**<sup>13</sup>C NMR (176 MHz, CDCl<sub>3</sub>):** δ 160.8, 153.4, 152.1, 140.6, 133.1, 132.3, 131.9, 131.31, 130.0, 129.9, 129.6, 129.2, 128.4, 124.5, 122.2, 120.8, 116.5.

**IR (KBr, cm<sup>-1</sup>):** 3056, 2984, 2923, 2849, 1736, 1611, 1566, 1490, 1445, 1264, 1191.

**HRMS (ESI) m/z:** [M+H]<sup>+</sup> Calcd for C<sub>21</sub>H<sub>14</sub>NO<sub>4</sub>: 344.0917; Found 344.0910.

### 3,4-diphenyl-6-(trifluoromethyl)-1*H*-isochromen-1-one (3ra)

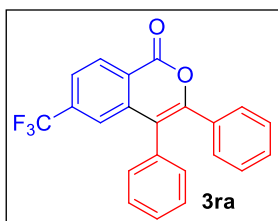

**3ra** was prepared according to general procedure C. The crude reaction mixture was purified by column chromatography using silica gel (100-200 mesh) giving **3ra** (25 mg) in 68% yield.

**Physical State:** pale-yellow solid, **m.p.:** 165-167 °C,

**R<sub>f</sub>-value:** 0.55 (10% EtOAc/hexane).

**<sup>1</sup>H NMR (400 MHz, CDCl<sub>3</sub>):** δ 8.45 (d, *J* = 8.0 Hz, 1H), 7.66 (d, *J* = 8.0 Hz, 1H), 7.38 (d, *J* = 4.4 Hz, 4H), 7.25 (d, *J* = 7.2 Hz, 2H), 7.19-7.11 (m, 5H).

**<sup>13</sup>C NMR (100 MHz, CDCl<sub>3</sub>):** δ 161.4, 152.7, 139.7, 136.6, 136.3, 133.6, 132.7, 131.4, 130.9, 129.7, 129.5, 128.9, 128.3, 124.2 (q, *J*<sub>C-F</sub> = 3.1 Hz), 123.1, 123.2 (q, *J*<sub>C-F</sub> = 272 Hz), 122.7 (q, *J*<sub>C-F</sub> = 3 Hz), 116.7.

**<sup>19</sup>F NMR (376 MHz, CDCl<sub>3</sub>):** δ -63.3.

**IR (KBr, cm<sup>-1</sup>):** 3060, 2968, 2855, 1737, 1682, 1632, 1599, 1556, 1494, 1446, 1261, 1168.

**HRMS (ESI) m/z:** [M+H]<sup>+</sup> Calcd for C<sub>22</sub>H<sub>14</sub>F<sub>3</sub>O<sub>2</sub>: 367.0940; Found 367.0965.

### 5-fluoro-3,4-diphenyl-1*H*-isochromen-1-one (3sa)

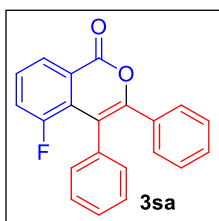

**3sa** was prepared according to general procedure C. The crude reaction mixture was purified by column chromatography using silica gel (100-200 mesh) giving **3sa** (26 mg) in 82 % yield.

**Physical State:** light-brown solid, **m.p.:** 188-191 °C,

**R<sub>f</sub>-value:** 0.50 (10% EtOAc/hexane).

**<sup>1</sup>H NMR (400 MHz, CDCl<sub>3</sub>):** δ 8.18 (d, *J* = 8.0 Hz, 1H), 7.44-7.39 (m, 1H), 7.25-7.22 (m, 4H), 7.19-7.18 (m, 4H), 7.14-7.07 (m, 3H).

**<sup>13</sup>C NMR (100 MHz, CDCl<sub>3</sub>):** δ 161.4 (d, *J*<sub>C-F</sub> = 3 Hz), 158.4 (d, *J*<sub>C-F</sub> = 256 Hz), 152.3, 136.0 (d, *J*<sub>C-F</sub> = 4 Hz), 133.1, 130.9 (d, *J*<sub>C-F</sub> = 3 Hz), 129.7, 129.4 (d, *J*<sub>C-F</sub> = 8 Hz), 129.3, 128.5, 128.1, 128.0, 127.1 (d, *J*<sub>C-F</sub> = 6 Hz), 126.2 (d, *J*<sub>C-F</sub> = 4 Hz), 122.7, 122.6 (d, *J*<sub>C-F</sub> = 22 Hz), 113.6 (d, *J*<sub>C-F</sub> = 2 Hz).

**<sup>19</sup>F NMR (376 MHz, CDCl<sub>3</sub>):** δ -107.5.

**IR (KBr, cm<sup>-1</sup>):** 3077, 3021, 2927, 2849, 1734, 1631, 1576, 1495, 1455, 1383, 1275, 1173.

**HRMS (ESI) m/z:** [M+Na]<sup>+</sup> Calcd for C<sub>21</sub>H<sub>13</sub>FNaO<sub>2</sub>: 339.0792; Found 339.0817.

### 3,4-diphenyl-7-(trifluoromethyl)-1*H*-isochromen-1-one (3ta)

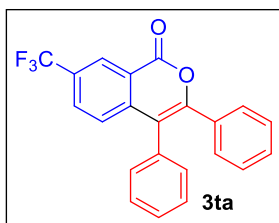

**3ta** was prepared according to general procedure C. The crude reaction mixture was purified by column chromatography using silica gel (100-200 mesh) giving **3ta** (21 mg) in 57% yield.

**Physical State:** light-brown solid, **m.p.:** 118-120 °C,

**R<sub>f</sub>-value:** 0.50 (10% EtOAc/hexane).

**<sup>1</sup>H NMR (400 MHz, CDCl<sub>3</sub>):** δ 8.60 (s, 1H), 7.75 (dd, *J* = 8.4, 1.6 Hz, 1H), 7.38-7.36 (m, 3H), 7.26 (t, *J* = 6.8 Hz, 3H), 7.20-7.11 (m, 5H).

**<sup>13</sup>C NMR (100 MHz, CDCl<sub>3</sub>):** δ 162.5, 153.3, 141.9, 133.9, 132.6, 131.4, 131.1 (q, *J*<sub>C-F</sub> = 3.0 Hz), 130.4 (q, *J*<sub>C-F</sub> = 33.0 Hz), 129.8, 129.67, 129.62, 128.8, 128.3, 127.4 (q, *J*<sub>C-F</sub> = 4.0 Hz), 126.5, 123.7 (q, *J*<sub>C-F</sub> = 271 Hz), 120.8, 116.6.

**<sup>19</sup>F NMR (376 MHz, CDCl<sub>3</sub>):** δ -62.7.

**IR (KBr, cm<sup>-1</sup>):** 3067, 3034, 2957, 2928, 2852, 1738, 1621, 1602, 1575, 1500, 1445, 1224, 1190.

**HRMS (ESI) m/z:** [M+H]<sup>+</sup> Calcd for C<sub>22</sub>H<sub>14</sub>F<sub>3</sub>O<sub>2</sub>: 367.0946; Found 367.0911.

### 6,7-diphenyl-4*H*-furo[3,2-*c*]pyran-4-one (3ua)

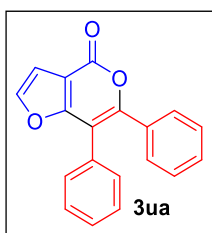

**3ua** was prepared according to general procedure C. The crude reaction mixture was purified by column chromatography using silica gel (100-200 mesh) giving **3ua** (18 mg) in 62 % yield.

**Physical State:** brown solid, **m.p.:** 168-170 °C,

**R<sub>f</sub>-value:** 0.35 (10% EtOAc/hexane).

**<sup>1</sup>H NMR (400 MHz, CDCl<sub>3</sub>):** δ 7.53 (d, *J* = 2.4 Hz, 1H), 7.41-7.37 (m, 5H), 7.34-7.28 (m, 3H), 7.26-7.21 (m, 2H), 7.00 (d, *J* = 2.0 Hz, 1H).

**<sup>13</sup>C NMR (100 MHz, CDCl<sub>3</sub>):** δ 161.7, 159.3, 158.2, 155.6, 144.9, 132.2, 131.0, 130.7, 130.0, 129.7, 129.2, 128.9, 128.4, 109.9, 108.2.

**IR (KBr, cm<sup>-1</sup>):** 3146, 3124, 3055, 2986, 1741, 1698, 1651, 1574, 1494, 1368, 1274, 1263.

**HRMS (ESI) m/z:** [M+Na]<sup>+</sup> Calcd for C<sub>19</sub>H<sub>12</sub>NaO<sub>3</sub>: 311.0679; Found 311.0691.

### 4,5-diphenyl-7H-thieno[2,3-c]pyran-7-one (3va)

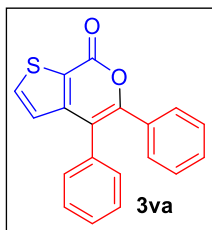

**3va** was prepared according to general procedure C. The crude reaction mixture was purified by column chromatography using silica gel (100-200 mesh) giving **3va** (17 mg) in 56 % yield.

**Physical State:** dark-brown solid, **m.p.:** 146-148 °C,

**R<sub>f</sub>-value:** 0.40 (10% EtOAc/hexane).

**<sup>1</sup>H NMR (700 MHz, CDCl<sub>3</sub>):**  $\delta$  7.77 (d,  $J$  = 4.90 Hz, 1H), 7.40-7.37 (m, 3H), 7.36 (d,  $J$  = 7.0 Hz, 2H), 7.28-7.25 (m, 3H), 7.21 (t,  $J$  = 7.7 Hz, 2H), 6.96 (d,  $J$  = 4.9 Hz, 1H).

**<sup>13</sup>C NMR (176 MHz, CDCl<sub>3</sub>):**  $\delta$  158.5, 153.7, 149.8, 136.5, 135.2, 132.6, 130.6, 129.6, 129.5, 129.4, 128.5, 128.3, 125.5, 123.1, 116.1.

**IR (KBr, cm<sup>-1</sup>):** 3103, 3055, 3022, 2962, 2926, 2855, 1718, 1616, 1573, 1515, 1491, 1261.

**HRMS (ESI) m/z:** [M+Na]<sup>+</sup> Calcd for C<sub>19</sub>H<sub>12</sub>NaSO<sub>2</sub>: 327.0456; Found 327.0471.

### 3,4-diethyl-1H-isochromen-1-one (3ab)

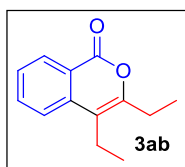

**3ab** was prepared according to general procedure C. The crude reaction mixture was purified by column chromatography using silica gel (100-200 mesh) giving **3ab** (13 mg) in 64 % yield.

**Physical State:** colorless solid, **m.p.:** 62-65 °C,

**R<sub>f</sub>-value:** 0.55 (10% EtOAc/hexane).

**<sup>1</sup>H NMR (400 MHz, CDCl<sub>3</sub>):**  $\delta$  8.24 (dd,  $J$  = 8.0, 1.2 Hz, 1H), 7.66 (td,  $J$  = 8.4, 1.2 Hz, 1H), 7.47 (d,  $J$  = 8.0 Hz, 1H), 7.38 (t,  $J$  = 8.0 Hz, 1H), 2.61-7.52 (m, 4H), 1.21 (t,  $J$  = 7.6 Hz, 3H), 1.13 (t,  $J$  = 7.6 Hz, 3H).

**<sup>13</sup>C NMR (100 MHz, CDCl<sub>3</sub>):**  $\delta$  163.3, 155.3, 138.1, 134.9, 130.2, 127.4, 122.7, 121.2, 113.3, 24.4, 19.6, 14.6, 12.8.

**IR (KBr, cm<sup>-1</sup>):** 3070, 2972, 2934, 2856, 1716, 1644, 1605, 1566, 1488, 1454, 1256, 1183.

**HRMS (ESI) m/z:** [M+H]<sup>+</sup> Calcd for C<sub>13</sub>H<sub>15</sub>O<sub>2</sub>: 203.1067; Found 203.1050.

### 3,4-dipropyl-1*H*-isochromen-1-one (3ac)

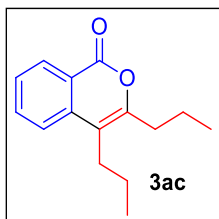

**3ac** was prepared according to general procedure C. The crude reaction mixture was purified by column chromatography using silica gel (100-200 mesh) giving **3ac** (16 mg) in 69 % yield.

**Physical State:** colorless oil.

**R<sub>f</sub>-value:** 0.55 (10% EtOAc/hexane).

**<sup>1</sup>H NMR (400 MHz, CDCl<sub>3</sub>):**  $\delta$  8.24 (d,  $J$  = 0.8 Hz, 1H), 7.65 (td,  $J$  = 8.4, 1.6 Hz, 1H), 7.45 (d,  $J$  = 8.4 Hz, 1H), 7.38 (t,  $J$  = 8.0 Hz, 1H), 2.25 (q,  $J$  = 8.0 Hz, 4H), 1.72-1.63 (m, 2H), 1.57-1.47 (m, 2H), 0.94 (quint,  $J$  = 7.2 Hz, 6H).

**<sup>13</sup>C NMR (100 MHz, CDCl<sub>3</sub>):**  $\delta$  163.2, 154.4, 138.3, 134.8, 130.1, 127.3, 122.9, 121.6, 112.5, 33.0, 28.5, 23.2, 21.5, 14.4, 14.1.

**IR (KBr, cm<sup>-1</sup>):** 3073, 2961, 2931, 2874, 1734, 1640, 1607, 1563, 1486, 1457, 1319, 1246, 1182.

**HRMS (ESI) m/z:** [M+Na]<sup>+</sup> Calcd for C<sub>15</sub>H<sub>18</sub>NaO<sub>2</sub>: 253.1199; Found 253.1183.

### 4-methyl-3-phenyl-1*H*-isochromen-1-one (3ad)

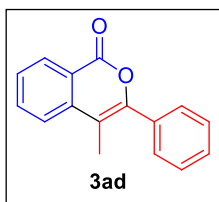

**3ad** was prepared according to general procedure C. The crude reaction mixture was purified by column chromatography using silica gel (100-200 mesh) giving **3ad** (14 mg) in 59 % yield.

**Physical State:** off-white solid, **m.p.:** 92-94 °C,

**R<sub>f</sub>-value:** 0.50 (10% EtOAc/hexane).

**<sup>1</sup>H NMR (400 MHz, CDCl<sub>3</sub>):**  $\delta$  8.38 (d,  $J$  = 8.0 Hz, 1H), 7.81 (t,  $J$  = 7.6 Hz, 1H), 7.64 (d,  $J$  = 8.0 Hz, 1H), 7.60-7.53 (m, 3H), 7.48-7.43 (m, 3H), 2.32 (s, 3H).

**<sup>13</sup>C NMR (100 MHz, CDCl<sub>3</sub>):**  $\delta$  162.8, 151.5, 139.1, 135.1, 133.5, 130.0, 129.8, 129.6, 128.5, 128.2, 123.7, 121.1, 109.4, 13.9.

**IR (KBr, cm<sup>-1</sup>):** 3058, 2994, 2952, 2864, 2849, 1736, 1698, 1617, 1651, 1606, 1577, 1495, 1470, 1443, 1285, 1244.

**HRMS (ESI) m/z:** [M+Na]<sup>+</sup> Calcd for C<sub>16</sub>H<sub>12</sub>NaO<sub>2</sub>: 259.0730; Found 259.0709

#### 4-ethyl-3-phenyl-1*H*-isochromen-1-one (3ae)

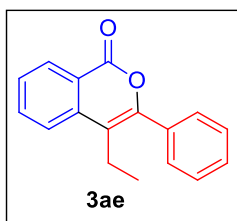

**3ae** was prepared according to general procedure C. The crude reaction mixture was purified by column chromatography using silica gel (100-200 mesh) giving **3ae** (15 mg) in 60% yield.

**Physical State:** off-white solid, **m.p.:** 138-140 °C,

**R<sub>f</sub>-value:** 0.50 (10% EtOAc/hexane).

**<sup>1</sup>H NMR (400 MHz, CDCl<sub>3</sub>):** δ 8.32 (d, *J* = 7.6 Hz, 1H), 7.72 (td, *J* = 8.0, 0.8 Hz, 1H), 7.60 (d, *J* = 8.0 Hz, 1H), 7.50-7.45 (m, 3H), 7.40-7.38 (m, 3H), 2.65 (q, *J* = 7.2 Hz, 2H), 1.21 (t, *J* = 7.6 Hz, 3H).

**<sup>13</sup>C NMR (100 MHz, CDCl<sub>3</sub>):** δ 162.8, 151.6, 138.0, 135.0, 133.7, 130.3, 129.7, 129.2, 128.6, 128.1, 123.7, 121.6, 115.5, 20.4, 15.0.

**IR (KBr, cm<sup>-1</sup>):** 3052, 2988, 2955, 2862, 2848, 1732, 1697, 1652, 1604, 1579, 1493, 1472, 1441, 1288, 1247.

**HRMS (ESI) m/z:** [M+Na]<sup>+</sup> Calcd for C<sub>17</sub>H<sub>14</sub>NaO<sub>2</sub>: 273.0886; Found 273.0891.

#### 3,4-di-*p*-tolyl-1*H*-isochromen-1-one (3ag)

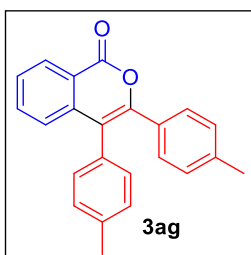

**3ag** was prepared according to general procedure C. The crude reaction mixture was purified by column chromatography using silica gel (100-200 mesh) giving **3ag** (27 mg) in 83 % yield.

**Physical State:** brown solid, **m.p.:** 153-155 °C,

**R<sub>f</sub>-value:** 0.55 (10% EtOAc/hexane).

**<sup>1</sup>H NMR (400 MHz, CDCl<sub>3</sub>):** δ 8.38 (d, *J* = 7.6 Hz, 1H), 7.60 (t, *J* = 7.2 Hz, 1H), 7.48 (t, *J* = 7.2 Hz, 1H), 7.25-7.17 (m, 5H), 7.13 (d, *J* = 8.0 Hz, 2H), 7.00 (d, *J* = 8.0 Hz, 2H), 2.41 (s, 3H), 2.28 (s, 3H).

**<sup>13</sup>C NMR (176 MHz, CDCl<sub>3</sub>):** δ 162.7, 151.2, 139.5, 139.2, 138.1, 134.8, 131.7, 131.3, 130.4, 130.1, 129.7, 129.3, 128.9, 128.1, 125.6, 120.6, 116.6, 21.67, 21.61.

**IR (KBr, cm<sup>-1</sup>):** 3060, 3021, 2991, 2943, 2867, 1732, 1697, 1682, 1652, 1597, 1555, 1478, 1319, 1264, 1182.

**HRMS (ESI) m/z:** [M+H]<sup>+</sup> Calcd for C<sub>23</sub>H<sub>19</sub>O<sub>2</sub>: 327.1380; Found 327.1357.

### 3,4-bis(4-methoxyphenyl)-1*H*-isochromen-1-one (**3ai**)

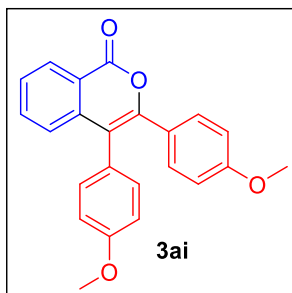

**3ai** was prepared according to general procedure C. The crude reaction mixture was purified by column chromatography using silica gel (100-200 mesh) giving **3ai** (26 mg) in 72% yield.

**Physical State:** off-white solid, **m.p.:** 159-161 °C,

**R<sub>f</sub>-value:** 0.55 (20% EtOAc/hexane).

**<sup>1</sup>H NMR (400 MHz, CDCl<sub>3</sub>):** δ 8.37 (d, *J* = 8.0 Hz, 1H), 7.61 (t, *J* = 7.6 Hz, 1H), 7.48 (t, *J* = 7.2 Hz, 1H), 7.29 (d, *J* = 8.8 Hz, 2H), 7.21-7.15 (m, 3H), 6.96 (d, *J* = 8.4 Hz, 2H), 6.72 (d, *J* = 8.8 Hz,

2H), 3.86 (s, 3H), 3.76 (s, 3H).

**<sup>13</sup>C NMR (176 MHz, CDCl<sub>3</sub>):** δ 162.7, 160.1, 159.6, 151.2, 139.8, 134.8, 132.6, 130.9, 129.7, 127.9, 126.9, 125.7, 125.4, 120.5, 115.6, 114.9, 113.6, 55.6, 55.5.

**IR (KBr, cm<sup>-1</sup>):** 3073, 3058, 2950, 2835, 1744, 1654, 1612, 1570, 1507, 1480, 1446, 1299, 1238.

**HRMS (ESI) m/z:** [M+H]<sup>+</sup> Calcd for C<sub>23</sub>H<sub>19</sub>O<sub>4</sub>: 359.1278; Found 359.1253.

### 3,4-bis(4-fluorophenyl)-1*H*-isochromen-1-one (**3aj**)

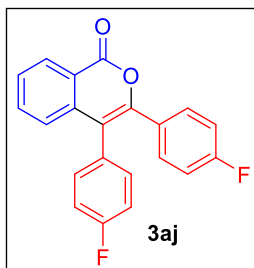

**3aj** was prepared according to general procedure C. The crude reaction mixture was purified by column chromatography using silica gel (100-200 mesh) giving **3aj** (29 mg) in 87 % yield.

**Physical State:** pale-yellow solid, **m.p.:** 161-164 °C,

**R<sub>f</sub>-value:** 0.50 (10% EtOAc/hexane).

**<sup>1</sup>H NMR (400 MHz, CDCl<sub>3</sub>):** δ 8.40 (d, *J* = 7.6 Hz, 1H), 7.66 (t, *J* = 7.6 Hz, 1H), 7.54 (t, *J* = 7.6 Hz, 1H), 7.30 (t, *J* = 5.6 Hz, 2H), 7.26-

7.21 (m, 2H), 7.14 (q, *J* = 7.6 Hz, 3H), 6.91 (t, *J* = 8.4 Hz, 2H),

**<sup>13</sup>C NMR (100 MHz, CDCl<sub>3</sub>):** δ 163.2 (d, *J*<sub>C-F</sub> = 249 Hz), 162.9 (d, *J*<sub>C-F</sub> = 247 Hz), 162.1, 150.7, 138.9, 135.1, 133.3 (d, *J*<sub>C-F</sub> = 8 Hz), 131.5 (d, *J*<sub>C-F</sub> = 9 Hz), 130.4 (d, *J*<sub>C-F</sub> = 4 Hz), 130.0, 129.3 (d, *J*<sub>C-F</sub> = 8 Hz), 128.6, 125.4, 120.8, 116.7 (d, *J*<sub>C-F</sub> = 21 Hz), 116.1, 115.5 (d, *J*<sub>C-F</sub> = 22 Hz).

**<sup>19</sup>F NMR (376 MHz, CDCl<sub>3</sub>):** δ -108.6, δ -113.1.

**IR (KBr, cm<sup>-1</sup>):** 3114, 3071, 2957, 2854, 1738, 1624, 1601, 1504, 1481, 1454, 1319, 1233, 1195.

**HRMS (ESI) m/z:** [M+Na]<sup>+</sup> Calcd for C<sub>21</sub>H<sub>12</sub>F<sub>2</sub>NaO<sub>2</sub>: 357.0698; Found 357.0669.

### 3,4-bis(4-chlorophenyl)-1*H*-isochromen-1-one (3ak)

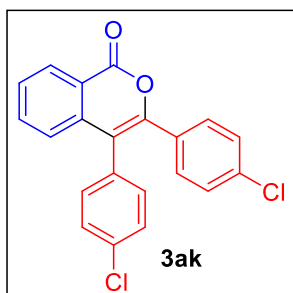

**3ak** was prepared according to general procedure C. The crude reaction mixture was purified by column chromatography using silica gel (100-200 mesh) giving **3ak** (28 mg) in 76 % yield.

**Physical State:** yellow solid, **m.p.:** 172-173 °C,

**R<sub>f</sub>-value:** 0.50 (10% EtOAc/hexane).

**<sup>1</sup>H NMR (700 MHz, CDCl<sub>3</sub>):** δ 8.40 (d, *J* = 7.7 Hz, 1H), 7.66 (t, *J* = 7.7 Hz, 1H), 7.55 (t, *J* = 7.7 Hz, 1H), 7.43 (d, *J* = 7.7 Hz, 2H), 7.26 (d, *J* = 8.4 Hz, 2H), 7.20 (t, *J* = 6.3 Hz, 4H), 7.16 (d, *J* = 7.7

Hz, 1H),

**<sup>13</sup>C NMR (176 MHz, CDCl<sub>3</sub>):** δ 162.1, 150.3, 138.5, 135.6, 135.2, 134.8, 132.8, 131.4, 130.8, 130.1, 129.9, 128.8, 128.7, 125.4, 120.7, 116.4.

**IR (KBr, cm<sup>-1</sup>):** 3071, 2925, 2849, 1732, 1620, 1590, 1564, 1488, 1453, 1400, 1263.

**HRMS (ESI) m/z:** [M+H]<sup>+</sup> Calcd for C<sub>21</sub>H<sub>13</sub>Cl<sub>2</sub>O<sub>2</sub>: 367.0287; Found 367.0288.

### 3,4,6-triphenyl-1*H*-isochromen-1-one (7)

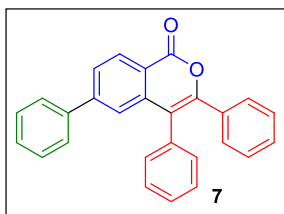

**7** was prepared according to the procedure in section 2.6.1. The crude reaction mixture was purified by column chromatography using silica gel (100-200 mesh) giving **7** (34 mg) in 91 % yield.

**Physical State:** colorless solid, **m.p.:** 205-206 °C,

**R<sub>f</sub>-value:** 0.50 (10% EtOAc/hexane).

**<sup>1</sup>H NMR (400 MHz, CDCl<sub>3</sub>):** δ 8.46 (d, *J* = 8.0 Hz, 1H), 7.74 (d, *J* = 8.0 Hz, 1H), 7.49 (d, *J* = 7.2 Hz, 2H), 7.41-7.37 (m, 7H), 7.34 (d, *J* = 7.6 Hz, 2H), 7.29 (d, *J* = 7.2 Hz, 2H), 7.24-7.19 (m, 3H).

**<sup>13</sup>C NMR (100 MHz, CDCl<sub>3</sub>):** δ 162.4, 151.7, 147.8, 140.0, 139.6, 134.6, 133.3, 131.6, 130.5, 129.6, 129.4, 129.33, 129.30, 128.8, 128.5, 128.2, 127.7, 127.4, 123.9, 119.6, 117.3.

**IR (KBr, cm<sup>-1</sup>):** 3106, 3053, 3019, 2955, 2922, 2850, 1737, 1698, 1682, 1651, 1611, 1578, 1556, 1488, 1477, 1444, 1407, 1298, 1220, 1156.

**HRMS (ESI) m/z:** [M+H]<sup>+</sup> Calcd for C<sub>27</sub>H<sub>19</sub>O<sub>2</sub>: 375.1385; Found 375.1375.

### 3,4-diphenyl-6-(phenylethynyl)-1*H*-isochromen-1-one (9)

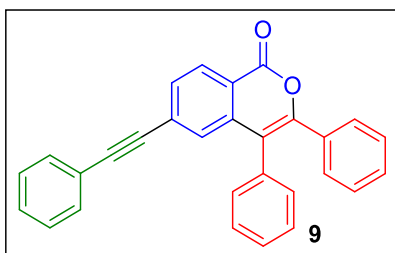

**9** was prepared according to the procedure in section 2.6.2. The crude reaction mixture was purified by column chromatography using silica gel (100-200 mesh) giving **9** (32 mg) in 80% yield.

**Physical State:** pale brown solid, **m.p.:** 198-200 °C,  
**R<sub>f</sub>-value:** 0.50 (10% EtOAc/hexane).

**<sup>1</sup>H NMR (400 MHz, CDCl<sub>3</sub>):** δ 8.37 (d, *J* = 8.4 Hz, 1H), 7.63 (dd, *J* = 8.0, 1.2 Hz, 1H), 7.51-7.49 (m, 2H), 7.46-7.42 (m, 3H), 7.35-7.31 (m, 5H), 7.29-7.17 (m, 6H).

**<sup>13</sup>C NMR (100 MHz, CDCl<sub>3</sub>):** δ 162.1, 152.0, 139.2, 134.2, 133.1, 132.1, 131.6, 131.3, 130.2, 129.9, 129.6, 129.5, 129.43, 129.40, 128.7, 128.6, 128.3, 128.2, 122.6, 119.8, 116.7, 93.8, 88.7.

**IR (KBr, cm<sup>-1</sup>):** 3081, 3057, 3019, 2206, 1731, 1667, 1625, 1562, 1519, 1441, 1296, 1195.

**HRMS (ESI) m/z:** [M+H]<sup>+</sup> Calcd for C<sub>29</sub>H<sub>19</sub>O<sub>2</sub>: 399.1385; Found 399.1409.

### 3,4-diphenyl-6-((trimethylsilyl)ethynyl)-1*H*-isochromen-1-one (11)

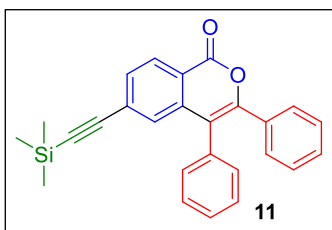

**11** was prepared according to the procedure in section 2.6.3. The crude reaction mixture was purified by column chromatography using silica gel (100-200 mesh) giving **11** (32 mg) in 81 % yield.

**Physical State:** off-white solid, **m.p.:** 202-205°C,

**R<sub>f</sub>-value:** 0.55 (10% EtOAc/hexane).

**<sup>1</sup>H NMR (400 MHz, CDCl<sub>3</sub>):** δ 8.32 (d, *J* = 8.0 Hz, 1H), 7.57 (dd, *J* = 8.4, 1.6 Hz, 1H), 7.46-7.41 (m, 3H), 7.31-7.28 (m, 2H), 7.26-7.16 (m, 6H), 0.22 (s, 9H).

**<sup>13</sup>C NMR (100 MHz, CDCl<sub>3</sub>):** δ 162.0, 151.9, 139.0, 134.2, 133.1, 131.8, 131.6, 130.0, 129.8, 129.58, 129.51, 129.4, 128.5, 128.2, 120.0, 116.7, 103.9, 99.5, 0.07.

**IR (KBr, cm<sup>-1</sup>):** 3129, 3078, 3017, 2156, 1732, 1698, 1661, 1634, 1584, 1557, 1494, 1243.

**HRMS (ESI) m/z:** [M+Na]<sup>+</sup> Calcd for C<sub>26</sub>H<sub>22</sub>SiNaO<sub>2</sub>: 417.1287; Found 417.1290.

### 6-ethynyl-3,4-diphenyl-1*H*-isochromen-1-one (**12**)

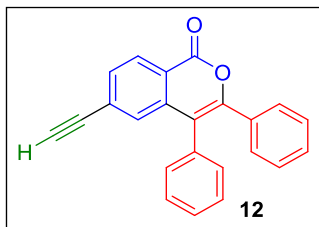

**12** was prepared according to the procedure in section 2.6.4. The crude reaction mixture was purified by column chromatography using silica gel (100-200 mesh) giving **12** (27 mg) in 84% yield.

**Physical State:** yellow solid, **m.p.:** 185-187 °C,

**R<sub>f</sub>-value:** 0.50 (10% EtOAc/hexane).

**<sup>1</sup>H NMR (400 MHz, CDCl<sub>3</sub>):** δ 8.35 (d, *J* = 8.4 Hz, 1H), 7.58 (d, *J* = 8.0 Hz, 1H), 7.43-7.41 (m, 3H), 7.32-7.30 (m, 3H), 7.26-7.17 (m, 5H), 3.22 (s, 1H).

**<sup>13</sup>C NMR (100 MHz, CDCl<sub>3</sub>):** δ 161.9, 152.0, 139.2, 134.1, 133.0, 131.6, 131.5, 129.9, 129.5, 129.4, 129.2, 128.9, 128.6, 128.2, 120.4, 116.6, 82.8, 81.5.

**IR (KBr, cm<sup>-1</sup>):** 3290, 3060, 2921, 2849, 2104, 1727, 1693, 1681, 1599, 1555, 1492, 1476, 1265.

**HRMS (ESI) m/z:** [M+H]<sup>+</sup> Calcd for C<sub>23</sub>H<sub>15</sub>O<sub>2</sub>: 323.1072; Found 323.1094.

### 3,4-diphenylisoquinolin-1(2*H*)-one (**13**)

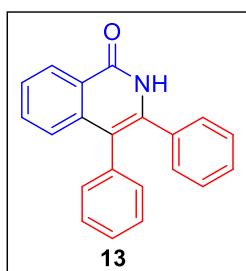

**13** was prepared according to the procedure in section 2.6.5. The crude reaction mixture was purified by column chromatography using silica gel (100-200 mesh) giving **13** (26 mg) in 87 % yield.

**Physical State:** off-white solid,

**m.p.:** 258-260 °C,

**R<sub>f</sub>-value:** 0.40 (30% EtOAc/hexane).

**<sup>1</sup>H NMR (400 MHz, CDCl<sub>3</sub>):** δ 9.23 (s, 1H), 8.47 (d, *J* = 7.6 Hz, 1H), 7.58 (t, *J* = 7.6 Hz, 1H), 7.50 (t, *J* = 8.0 Hz, 1H), 7.35 (d, *J* = 8.0 Hz, 1H), 7.33-7.28 (m, 3H), 7.25-7.24 (m, 5H), 7.19-7.17 (m, 2H),

**<sup>13</sup>C NMR (100 MHz, CDCl<sub>3</sub>):** δ 163.0, 139.0, 137.3, 136.0, 135.4, 133.0, 132.1, 129.5, 129.0, 128.7, 127.8, 127.6, 126.9, 126.0, 125.4, 117.6.

**IR (KBr, cm<sup>-1</sup>):** 3044, 3025, 2985, 1650, 1576, 1536, 1515, 1471, 1346, 1267, 1156.

**HRMS (ESI) m/z:** [M+H]<sup>+</sup> Calcd for C<sub>21</sub>H<sub>16</sub>NO: 398.1232; Found 398.1235.

### 1-methyl-3,4-diphenylisoquinoline (5aa)

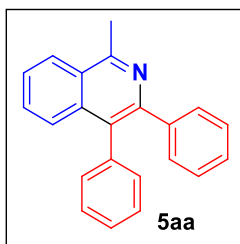

**5aa** was prepared according to general procedure D. The crude reaction mixture was purified by column chromatography using silica gel (100-200 mesh) giving **5aa** (25 mg) in 85% yield.

**Physical State:** white solid, **m.p.:** 151-153 °C,

**R<sub>f</sub>-value:** 0.45 (10% EtOAc/hexane).

**<sup>1</sup>H NMR (400 MHz, CDCl<sub>3</sub>):** δ 8.21-8.19 (m, 1H), 7.67-7.64 (m, 1H), 7.61-7.57 (m, 2H), 7.37-7.31 (m, 5H), 7.23-7.16 (m, 5H), 3.08

(s, 3H).

**<sup>13</sup>C NMR (100 MHz, CDCl<sub>3</sub>):** δ 158.0, 149.7, 141.3, 137.9, 136.3, 131.7, 130.6, 130.2, 129.5, 128.5, 127.9, 127.4, 127.2, 126.8, 126.5, 126.4, 125.8, 23.0.

**IR (KBr, cm<sup>-1</sup>):** 3055, 2952, 2918, 2852, 1610, 1566, 1503, 1431, 1334, 1267, 1156, 1073.

**HRMS (ESI) m/z:** [M+H]<sup>+</sup> Calcd for C<sub>22</sub>H<sub>18</sub>N: 296.1439; Found 296.1459.

### 6-methoxy-1-methyl-3,4-diphenylisoquinoline (5ba)

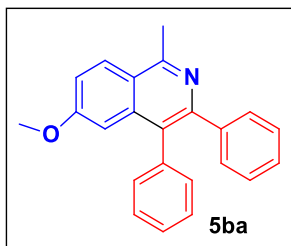

**5ba** was prepared according to general procedure D. The crude reaction mixture was purified by column chromatography using silica gel (100-200 mesh) giving **5ba** (18 mg) in 55% yield.

**Physical State:** pale brown solid, **m.p.:** 177-180 °C,

**R<sub>f</sub>-value:** 0.45 (15% EtOAc/hexane).

**<sup>1</sup>H NMR (400 MHz, CDCl<sub>3</sub>):** δ 8.11 (d, *J* = 9.2 Hz, 1H), 7.35-7.29 (m, 5H), 7.23-7.16 (m, 6H), 6.91 (d, *J* = 2.8 Hz, 1H), 3.72

(s, 3H), 3.02 (s, 3H).

**<sup>13</sup>C NMR (100 MHz, CDCl<sub>3</sub>):** δ 160.8, 157.3, 150.4, 141.4, 138.4, 138.1, 131.6, 130.5, 128.9, 128.6, 127.9, 127.8, 127.4, 127.2, 122.2, 119.0, 104.8, 55.5, 22.9.

**IR (KBr, cm<sup>-1</sup>):** 3058, 2957, 2854, 1617, 1573, 1500, 1409, 1345, 1260, 1176, 1070.

**HRMS (ESI) m/z:** [M+H]<sup>+</sup> Calcd for C<sub>23</sub>H<sub>20</sub>NO: 326.1545; Found 326.1532.

### 5,6-dimethoxy-1-methyl-3,4-diphenylisoquinoline (**5ca**)

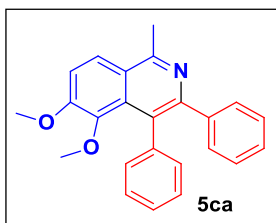

**5ca** was prepared according to general procedure D. The crude reaction mixture was purified by column chromatography using silica gel (100-200 mesh) giving **5ca** (22 mg) in 62 % yield.

**Physical State:** pale yellow solid, **m.p.:** 162-164 °C,

**R<sub>f</sub>-value:** 0.5 (30% EtOAc/hexane).

**<sup>1</sup>H NMR (400 MHz, CDCl<sub>3</sub>):**  $\delta$  8.02 (d,  $J$  = 9.2 Hz, 1H), 7.39 (d,  $J$  = 9.2 Hz, 1H), 7.22 (dd,  $J$  = 8.4, 2.0 Hz, 2H), 7.19-7.10 (m, 8H), 3.98 (s, 3H), 3.07 (s, 3H), 3.01 (s, 3H).

**<sup>13</sup>C NMR (100 MHz, CDCl<sub>3</sub>):**  $\delta$  157.7, 153.6, 151.9, 144.2, 141.9, 140.7, 131.4, 131.2, 130.5, 127.6, 126.89, 126.85, 126.1, 123.3, 123.1, 114.7, 60.7, 56.6, 23.3.

**IR (KBr, cm<sup>-1</sup>):** 3058, 3007, 2961, 1619, 1573, 1504, 1462, 1381, 1253, 1167, 1062.

**HRMS (ESI) m/z:** [M+Na]<sup>+</sup> Calcd for C<sub>24</sub>H<sub>21</sub>NO<sub>2</sub>Na: 378.1470; Found 378.1450.

### 6,7-dimethoxy-1-methyl-3,4-diphenylisoquinoline (**5ca'**)

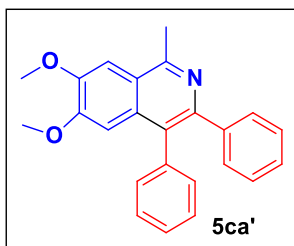

**5ca'** was prepared according to general procedure D. The crude reaction mixture was purified by column chromatography using silica gel (100-200 mesh) giving **5ca'** (8 mg) in 22% yield.

**Physical State:** white solid, **m.p.:** 159-161 °C,

**R<sub>f</sub>-value:** 0.45 (30% EtOAc/hexane).

**<sup>1</sup>H NMR (400 MHz, CDCl<sub>3</sub>):**  $\delta$  7.38-7.30 (m, 6H), 7.23 (d,  $J$  = 1.6 Hz, 1H), 7.21-7.14 (m, 4H), 6.92 (s, 1H), 4.07 (s, 3H), 3.77 (s, 3H), 3.00 (s, 3H).

**<sup>13</sup>C NMR (176 MHz, CDCl<sub>3</sub>):**  $\delta$  155.3, 152.6, 149.8, 149.0, 141.5, 138.3, 132.9, 131.5, 130.5, 128.7, 128.6, 127.8, 127.4, 127.04, 122.4, 104.9, 104.1, 56.3, 56.0, 23.1.

**IR (KBr, cm<sup>-1</sup>):** 3044, 2965, 2853, 1606, 1546, 1499, 1454, 1388, 1273, 1151, 1068.

**HRMS (ESI) m/z:** [M+Na]<sup>+</sup> Calcd for C<sub>24</sub>H<sub>21</sub>NO<sub>2</sub>Na: 378.1470; Found 378.1497.

### 6-methyl-8,9-diphenyl-[1,3]dioxolo[4,5-f]isoquinoline (**5da**)

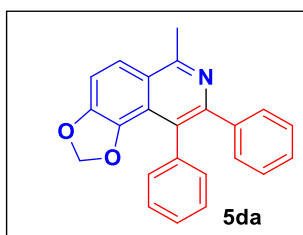

**5da** was prepared according to general procedure D. The crude reaction mixture was purified by column chromatography using silica gel (100-200 mesh) giving **5da** (22 mg) in 65 % yield.

**Physical State:** pale yellow solid, **m.p.:** 253-256 °C,

**R<sub>f</sub>-value:** 0.45 (15% EtOAc/hexane).

**<sup>1</sup>H NMR (400 MHz, CDCl<sub>3</sub>):** δ 7.83 (d, *J* = 8.8 Hz, 1H), 7.29-7.27 (m, 3H), 7.24-7.14 (m, 8H), 5.84 (s, 2H), 3.00 (s, 3H).

**<sup>13</sup>C NMR (100 MHz, CDCl<sub>3</sub>):** δ 158.1, 150.5, 147.9, 142.0, 141.1, 138.7, 131.5, 130.5, 127.8, 127.4, 127.17, 127.12, 125.1, 123.5, 122.8, 121.2, 111.2, 110.7, 23.7.

**IR (KBr, cm<sup>-1</sup>):** 3083, 2993, 2903, 2853, 1625, 1576, 1513, 1451, 1353, 1278, 1177, 1036.

**HRMS (ESI) m/z:** [M+Na]<sup>+</sup> Calcd for C<sub>23</sub>H<sub>17</sub>NO<sub>2</sub>Na: 362.1157; Found 362.1167.

### 3,4-diphenyl-6-(trifluoromethyl)-1*H*-isochromen-1-one (**5ea**)

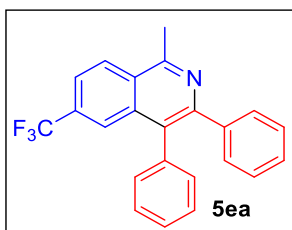

**5ea** was prepared according to general procedure D. The crude reaction mixture was purified by column chromatography using silica gel (100-200 mesh) giving **5ea** (16 mg) in 44% yield.

**Physical State:** white solid, **m.p.:** 105-107 °C,

**R<sub>f</sub>-value:** 0.40 (10% EtOAc/hexane).

**<sup>1</sup>H NMR (400 MHz, CDCl<sub>3</sub>):** δ 8.32 (d, *J* = 8.4 Hz, 1H), 7.97 (s, 1H), 7.76 (dd, *J* = 8.4, 1.2 Hz, 1H), 7.38-7.34 (m, 5H), 7.28-7.19 (m, 5H), 3.11 (s, 3H).

**<sup>13</sup>C NMR (176 MHz, CDCl<sub>3</sub>):** δ 158.2, 151.2, 140.7, 136.8, 135.8, 131.8 (q, *J*<sub>C-F</sub> = 31.6 Hz), 131.6, 130.5, 130.0, 128.8, 128.08, 128.03, 127.6, 127.3, 127.2, 124.2 (q, *J*<sub>C-F</sub> = 5.2 Hz), 124.1 (q, *J*<sub>C-F</sub> = 272.9 Hz), 122.5, 23.1.

**<sup>19</sup>F NMR (376 MHz, CDCl<sub>3</sub>):** δ -62.8.

**IR (KBr, cm<sup>-1</sup>):** 3087, 3036, 2924, 2854, 1574, 1504, 1434, 1385, 1306, 1256, 1176, 1081.

**HRMS (ESI) m/z:** [M+H]<sup>+</sup> Calcd for C<sub>23</sub>H<sub>17</sub>F<sub>3</sub>N: 364.1313; Found 364.1277.

### 1-ethyl-3,4-diphenylisoquinoline (5fa)

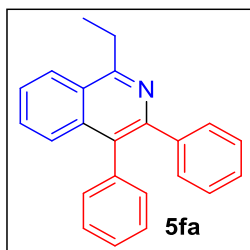

**5fa** was prepared according to general procedure D. The crude reaction mixture was purified by column chromatography using silica gel (100-200 mesh) giving **5fa** (25 mg) in 82% yield.

**Physical State:** white solid, **m.p.:** 152-154 °C.

**R<sub>f</sub>-value:** 0.45 (10% EtOAc/hexane).

**<sup>1</sup>H NMR** (400 MHz, CDCl<sub>3</sub>): δ 8.24 (d, *J* = 10.0 Hz, 1H), 7.67-7.65 (m, 1H), 7.58-7.56 (m, 2H), 7.39-7.33 (m, 5H), 7.24-7.17 (m, 5H),

3.44 (t, *J* = 7.6 Hz, 2H), 1.53 (t, *J* = 7.6 Hz, 3H).

**<sup>13</sup>C NMR** (100 MHz, CDCl<sub>3</sub>): δ 162.4, 149.4, 141.2, 137.8, 136.4, 131.5, 130.4, 129.8, 129.0, 128.3, 127.7, 127.2, 127.0, 126.57, 126.54, 125.4, 125.2, 28.9, 14.1.

**IR** (KBr, cm<sup>-1</sup>): 3053, 2954, 2917, 2853, 1611, 1564, 1504, 1434, 1335, 1262, 1158, 1076.

**HRMS (ESI) m/z:** [M+H]<sup>+</sup> Calcd for C<sub>23</sub>H<sub>20</sub>N: 310.1596; Found 310.1606.

### 3,4-diphenyl-1-propylisoquinoline (5ga)

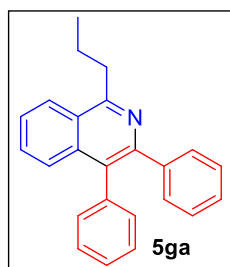

**5ga** was prepared according to general procedure D. The crude reaction mixture was purified by column chromatography using silica gel (100-200 mesh) giving **5ga** (26 mg) in 80% yield.

**Physical State:** white solid, **m.p.:** 155-157 °C.

**R<sub>f</sub>-value:** 0.45 (10% EtOAc/hexane).

**<sup>1</sup>H NMR** (400 MHz, CDCl<sub>3</sub>): δ 8.25-8.22 (m, 1H), 7.67-7.64 (m, 1H), 7.58-7.55 (m, 2H), 7.37-7.33 (m, 5H), 7.24-7.17 (m, 5H), 3.38 (t, *J* = 7.6 Hz, 2H), 2.00 (sextet, *J* = 7.6 Hz, 2H), 1.14 (t, *J* = 7.6 Hz, 3H).

**<sup>13</sup>C NMR** (100 MHz, CDCl<sub>3</sub>): δ 161.4, 149.4, 141.2, 137.8, 136.4, 131.5, 130.4, 129.8, 129.0, 128.3, 127.7, 127.2, 127.0, 126.5, 126.4, 125.6, 125.4, 37.8, 23.3, 14.6.

**IR** (KBr, cm<sup>-1</sup>): 3056, 2951, 2916, 2853, 1612, 1562, 1501, 1433, 1331, 1264, 1152, 1071.

**HRMS (ESI) m/z:** [M+H]<sup>+</sup> Calcd for C<sub>24</sub>H<sub>21</sub>N: 324.1752; Found 324.1761.

### 7-methyl-4,5-diphenylfuro[2,3-c]pyridine (**5ia**)

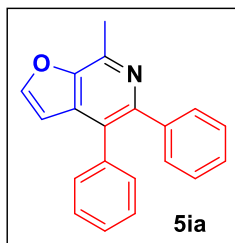

**5ia** was prepared according to general procedure D. The crude reaction mixture was purified by column chromatography using silica gel (100-200 mesh) giving **5ia** (10 mg) in 35% yield.

**Physical State:** white solid, **m.p.:** 172-174 °C.

**R<sub>f</sub>-value:** 0.50 (10% EtOAc/hexane).

**<sup>1</sup>H NMR** (400 MHz, CDCl<sub>3</sub>): δ 7.73 (d, *J* = 2.3 Hz, 1H), 7.33 (dd, *J* = 6.6, 2.9 Hz, 2H), 7.27 (t, *J* = 9.7 Hz, 3H), 7.23 – 7.17 (m, 5H), 6.72 (d, *J* = 2.2 Hz, 1H), 2.85 (s, 3H).

**<sup>13</sup>C NMR** (100 MHz, CDCl<sub>3</sub>): δ 150.04, 149.69, 147.95, 141.40, 140.58, 137.75, 134.37, 130.43, 130.28, 128.40, 127.88, 127.18, 127.14, 126.82, 106.58, 18.79.

**IR** (KBr, cm<sup>-1</sup>): 3058, 2950, 2918, 2852, 1614, 1563, 1505, 1431, 1335, 1263, 1151, 1073.

**HRMS (ESI) m/z:** [M+H]<sup>+</sup> Calcd for C<sub>20</sub>H<sub>16</sub>NO: 287.1310; Found 287.1308.

### 8,9-diethyl-6-methyl-[1,3]dioxolo[4,5-f]isoquinoline (**5db**)

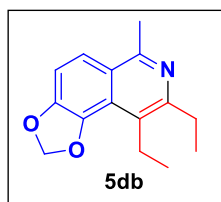

**5db** was prepared according to general procedure D. The crude reaction mixture was purified by column chromatography using silica gel (100-200 mesh) giving **5db** (23 mg) in 94 % yield.

**Physical State:** brown solid, **m.p.:** 79-81 °C,

**R<sub>f</sub>-value:** 0.45 (15% EtOAc/hexane).

**<sup>1</sup>H NMR** (400 MHz, CDCl<sub>3</sub>): δ 7.68 (d, *J* = 8.8 Hz, 1H), 7.17 (d, *J* = 8.8 Hz, 1H), 6.13 (s, 2H), 3.10 (q, *J* = 7.6 Hz, 2H), 2.90 (q, *J* = 7.6 Hz, 2H), 2.84 (s, 3H), 1.32 (t, *J* = 7.6 Hz, 3H), 1.23 (t, *J* = 7.6 Hz, 3H).

**<sup>13</sup>C NMR** (176 MHz, CDCl<sub>3</sub>): δ 156.0, 153.1, 147.1, 141.2, 125.0, 123.9, 123.5, 121.5, 110.2, 101.4, 28.0, 23.2, 22.6, 16.3, 15.2.

**IR** (KBr, cm<sup>-1</sup>): 2979, 2955, 2927, 2867, 1629, 1575, 1514, 1445, 1350, 1276, 1185, 1043.

**HRMS (ESI) m/z:** [M+H]<sup>+</sup> Calcd for C<sub>15</sub>H<sub>18</sub>NO<sub>2</sub>: 244.1338; Found 244.1316.

### 6-methyl-8,9-dipropyl-[1,3]dioxolo[4,5-*f*]isoquinoline (**5dc**)

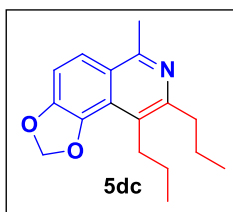

**5dc** was prepared according to general procedure D. The crude reaction mixture was purified by column chromatography using silica gel (100-200 mesh) giving **5dc** (24 mg) in 88 % yield.

**Physical State:** brown solid, **m.p.:** 94-96 °C.

**R<sub>f</sub>-value:** 0.5 (20% EtOAc/hexane).

**<sup>1</sup>H NMR (400 MHz, CDCl<sub>3</sub>):**  $\delta$  7.68 (d,  $J$  = 8.8 Hz, 1H), 7.16 (d,  $J$  = 8.8 Hz, 1H), 6.12 (s, 2H), 3.02 (t,  $J$  = 8.4 Hz, 2H), 2.85-2.81 (m, 5H), 1.76 (sextet,  $J$  = 7.6 Hz, 2H), 1.60 (sextet,  $J$  = 7.2 Hz, 2H), 1.03 (t,  $J$  = 7.2 Hz, 6H).

**<sup>13</sup>C NMR (100 MHz, CDCl<sub>3</sub>):**  $\delta$  155.8, 152.1, 147.0, 141.3, 124.0, 123.8, 123.7, 121.5, 110.1, 101.4, 37.0, 31.5, 25.4, 24.4, 23.2, 14.77, 14.72.

**IR (KBr, cm<sup>-1</sup>):** 2962, 2931, 2873, 2857, 1629, 1567, 1493, 1443, 1352, 1266, 1180, 1046.

**HRMS (ESI) m/z:** [M+H]<sup>+</sup> Calcd for C<sub>17</sub>H<sub>22</sub>NO<sub>2</sub>: 272.1650; Found 272.1662.

### 9-butyl-6-methyl-8-phenyl-[1,3]dioxolo[4,5-*f*]isoquinoline (**5df**)

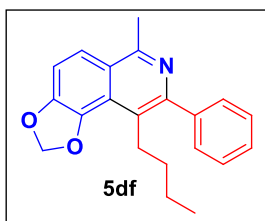

**5df** was prepared according to general procedure D. The crude reaction mixture was purified by column chromatography using silica gel (100-200 mesh) giving **5df** (13 mg) in 41 % yield.

**Physical State:** brown solid, **m.p.:** 114-116 °C.

**R<sub>f</sub>-value:** 0.5 (20% EtOAc/hexane).

**<sup>1</sup>H NMR (400 MHz, CDCl<sub>3</sub>):**  $\delta$  7.77 (d,  $J$  = 8.8 Hz, 1H), 7.48-7.41 (m, 4H), 7.39-7.35 (m, 1H), 7.26 (d,  $J$  = 8.8 Hz, 1H), 6.16 (s, 2H), 2.97 (t,  $J$  = 8.0 Hz, 2H), 2.89 (s, 3H), 1.56-1.48 (m, 2H), 1.24 (sextet,  $J$  = 7.6 Hz, 2H), 0.78 (t,  $J$  = 7.2 Hz, 3H).

**<sup>13</sup>C NMR (176 MHz, CDCl<sub>3</sub>):**  $\delta$  155.8, 151.4, 147.4, 141.89, 141.82, 129.7, 128.4, 127.7, 125.3, 124.3, 123.5, 121.7, 110.9, 101.6, 34.6, 30.0, 23.4, 23.0, 14.1.

**IR (KBr, cm<sup>-1</sup>):** 3063, 2958, 2928, 2868, 1625, 1563, 1513, 1443, 1352, 1275, 1182, 1118, 1073.

**HRMS (ESI) m/z:** [M+H]<sup>+</sup> Calcd for C<sub>21</sub>H<sub>22</sub>NO<sub>2</sub>: 320.1650; Found 320.1631.

### 6-methyl-8,9-di-*p*-tolyl-[1,3]dioxolo[4,5-*f*]isoquinoline (**5dg**)

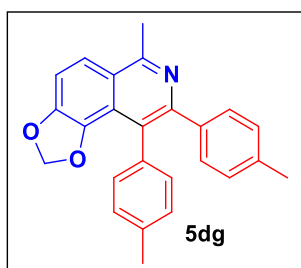

**5dg** was prepared according to general procedure D. The crude reaction mixture was purified by column chromatography using silica gel (100-200 mesh) giving **5dg** (28 mg) in 76 % yield.

**Physical State:** white solid, **m.p.:** 179-181 °C,

**R<sub>f</sub>-value:** 0.50 (15% EtOAc/hexane).

**<sup>1</sup>H NMR (400 MHz, CDCl<sub>3</sub>):** δ 7.72 (d, *J* = 8.8 Hz, 1H), 7.16 (d, *J* = 8.8 Hz, 1H), 7.11 (d, *J* = 8.0 Hz, 2H), 7.00 (d, *J* = 8.0 Hz,

2H), 6.95 (d, *J* = 7.6 Hz, 2H), 6.89 (d, *J* = 8.0 Hz, 2H), 5.76 (s, 2H), 2.91 (s, 3H), 2.27 (s, 3H), 2.18 (s, 3H).

**<sup>13</sup>C NMR (100 MHz, CDCl<sub>3</sub>):** δ 157.8, 150.3, 147.9, 142.0, 138.2, 136.7, 136.5, 135.7, 131.2, 130.4, 128.5, 128.2, 124.9, 123.5, 123.1, 121.2, 111.0, 101.6, 23.6, 21.7, 21.5.

**IR (KBr, cm<sup>-1</sup>):** 3025, 2991, 2919, 2854, 1624, 1573, 1551, 1438, 1355, 1276, 1183, 1045.

**HRMS (ESI) m/z:** [M+Na]<sup>+</sup> Calcd for C<sub>25</sub>H<sub>21</sub>NO<sub>2</sub>Na: 390.1470; Found 390.1432.

### 8,9-bis(4-(*tert*-butyl)phenyl)-6-methyl-[1,3]dioxolo[4,5-*f*]isoquinoline (**5dh**)

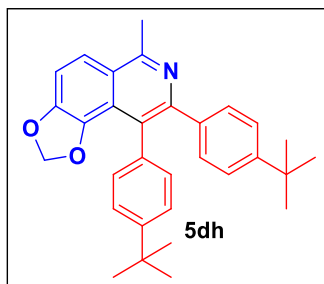

**5dh** was prepared according to general procedure D. The crude reaction mixture was purified by column chromatography using silica gel (100-200 mesh) giving **5dh** (33 mg) in 73% yield.

**Physical State:** yellow solid, **m.p.:** 134-137 °C,

**R<sub>f</sub>-value:** 0.50 (10% EtOAc/hexane).

**<sup>1</sup>H NMR (400 MHz, CDCl<sub>3</sub>):** δ 7.80 (d, *J* = 8.8 Hz, 1H), 7.25-7.21 (m, 3H), 7.18-7.10 (m, 6H), 5.85 (s, 2H), 2.98 (s, 3H), 1.31

(s, 9H), 1.23 (s, 9H).

**<sup>13</sup>C NMR (100 MHz, CDCl<sub>3</sub>):** δ 157.7, 150.7, 149.9, 149.7, 147.8, 142.0, 138.3, 131.1, 130.0, 124.9, 124.6, 124.2, 123.5, 123.0, 121.1, 110.9, 101.6, 34.8, 34.6, 31.7, 31.5, 23.7.

**IR (KBr, cm<sup>-1</sup>):** 2953, 2921, 2857, 1627, 1566, 1519, 1434, 1354, 1278, 1127, 1047.

**HRMS (ESI) m/z:** [M+H]<sup>+</sup> Calcd for C<sub>31</sub>H<sub>34</sub>NO<sub>2</sub>: 452.2589; Found 452.2560.

### 8,9-bis(4-methoxyphenyl)-6-methyl-[1,3]dioxolo[4,5-f]isoquinoline (**5di**)

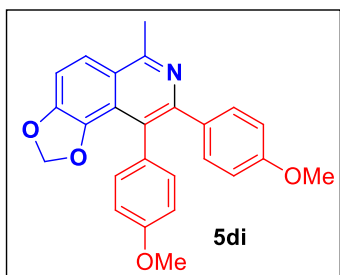

**5di** was prepared according to general procedure D. The crude reaction mixture was purified by column chromatography using silica gel (100-200 mesh) giving **5di** (36 mg) in 90% yield.

**Physical State:** light brown solid, **m.p.:** 219-220 °C,

**R<sub>f</sub>-value:** 0.50 (30% EtOAc/hexane).

**<sup>1</sup>H NMR (400 MHz, CDCl<sub>3</sub>):**  $\delta$  7.79 (d,  $J$  = 8.8 Hz, 1H), 7.24 (dd,  $J$  = 7.2, 1.6 Hz, 3H), 7.10 (d,  $J$  = 8.4 Hz, 2H), 6.79 (d,  $J$  = 8.8 Hz, 2H), 6.72 (d,  $J$  = 8.8 Hz, 2H), 5.85 (s, 2H), 3.81 (s, 3H), 3.75 (s, 3H), 2.98 (s, 3H).

**<sup>13</sup>C NMR (176 MHz, CDCl<sub>3</sub>):**  $\delta$  158.7, 157.7, 150.2, 147.8, 141.9, 133.8, 132.5, 131.8, 131.2, 124.3, 123.5, 123.4, 121.2, 113.3, 113.0, 110.9, 101.6, 55.5, 55.4, 23.7.

**IR (KBr, cm<sup>-1</sup>):** 3016, 2959, 2918, 2839, 1606, 1578, 1514, 1448, 1354, 1288, 1180, 1048.

**HRMS (ESI) m/z:** [M+Na]<sup>+</sup> Calcd for C<sub>25</sub>H<sub>21</sub>NO<sub>4</sub>Na: 422.1368; Found 422.1354.

### 8,9-bis(4-fluorophenyl)-6-methyl-[1,3]dioxolo[4,5-f]isoquinoline (**5dj**)

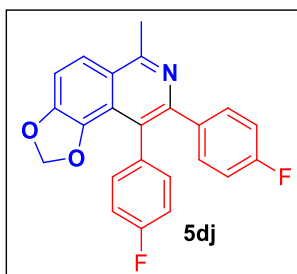

**5dj** was prepared according to general procedure D. The crude reaction mixture was purified by column chromatography using silica gel (100-200 mesh) giving **5dj** (34 mg) in 91% yield.

**Physical State:** brown solid, **m.p.:** 194-196 °C,

**R<sub>f</sub>-value:** 0.50 (15% EtOAc/hexane).

**<sup>1</sup>H NMR (400 MHz, CDCl<sub>3</sub>):**  $\delta$  7.75 (d,  $J$  = 8.8 Hz, 1H), 7.20-7.16 (m, 3H), 7.06 (td,  $J$  = 5.6, 2.4 Hz, 2H), 6.86 (t,  $J$  = 8.8 Hz, 2H), 6.80 (t,  $J$  = 8.8 Hz, 2H), 5.78 (s, 2H), 2.91 (s, 3H).

**<sup>13</sup>C NMR (100 MHz, CDCl<sub>3</sub>):**  $\delta$  162.3 (d,  $J_{C-F}$  = 245 Hz), 162.2 (d,  $J_{C-F}$  = 246 Hz), 158.4, 149.4, 148.1, 141.9, 136.8 (d,  $J_{C-F}$  = 3 Hz), 134.4 (d,  $J_{C-F}$  = 4 Hz), 132.9 (d,  $J_{C-F}$  = 8 Hz), 132.2 (d,  $J_{C-F}$  = 8 Hz), 124.1, 123.5, 122.8, 121.4, 114.9 (d,  $J_{C-F}$  = 22 Hz), 114.6 (d,  $J_{C-F}$  = 21 Hz), 111.4, 101.8, 23.6.

**<sup>19</sup>F NMR (376 MHz, CDCl<sub>3</sub>):**  $\delta$  -115.1,  $\delta$  -115.2.

**IR (KBr, cm<sup>-1</sup>):** 3051, 2960, 2921, 2873, 1624, 1599, 1518, 1444, 1347, 1275, 1155, 1044.

**HRMS (ESI) m/z:** [M+H]<sup>+</sup> Calcd for C<sub>23</sub>H<sub>16</sub>F<sub>2</sub>NO<sub>2</sub>: 376.1149; Found 376.1163.

### 8,9-bis(4-chlorophenyl)-6-methyl-[1,3]dioxolo[4,5-f]isoquinoline (**5dk**)

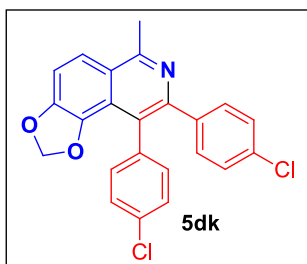

**5dk** was prepared according to general procedure D. The crude reaction mixture was purified by column chromatography using silica gel (100-200 mesh) giving **5dk** (32 mg) in 78 % yield.

**Physical State:** white solid, **m.p.:** 231-233 °C,

**R<sub>f</sub>-value:** 0.50 (15% EtOAc/hexane).

**<sup>1</sup>H NMR (400 MHz, CDCl<sub>3</sub>):** δ 7.83 (d, *J* = 8.8 Hz, 1H), 7.29-7.21 (m, 5H), 7.17 (d, *J* = 8.4 Hz, 2H), 7.11 (d, *J* = 8.4 Hz, 2H),

5.87 (s, 2H), 2.98 (s, 3H).

**<sup>13</sup>C NMR (100 MHz, CDCl<sub>3</sub>):** δ 158.7, 149.2, 148.2, 141.9, 139.3, 136.9, 133.49, 133.41, 132.7, 131.8, 128.2, 127.9, 124.0, 123.5, 122.5, 121.4, 111.5, 101.9, 23.7.

**IR (KBr, cm<sup>-1</sup>):** 2993, 2921, 2895, 2856, 1625, 1552, 1513, 1448, 1354, 1278, 1119, 1046.

**HRMS (ESI) m/z:** [M+H]<sup>+</sup> Calcd for C<sub>23</sub>H<sub>16</sub>Cl<sub>2</sub>NO<sub>2</sub>: 408.0558; Found 408.0546.

### 8,9-bis(3-fluorophenyl)-6-methyl-[1,3]dioxolo[4,5-f]isoquinoline (**5dl**)

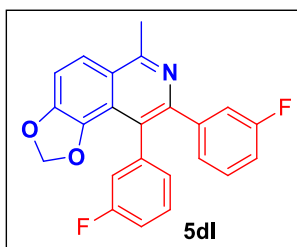

**5dl** was prepared according to general procedure D. The crude reaction mixture was purified by column chromatography using silica gel (100-200 mesh) giving **5dl** (33 mg) in 87% yield.

**Physical State:** white solid, **m.p.:** 187-190 °C,

**R<sub>f</sub>-value:** 0.50 (15% EtOAc/hexane).

**<sup>1</sup>H NMR (400 MHz, CDCl<sub>3</sub>):** δ 7.83 (d, *J* = 8.8 Hz, 1H), 7.28 (d, *J* = 8.8 Hz, 1H), 7.22-6.94 (m, 7H), 6.86 (td, *J* = 7.2, 2.4 Hz,

1H), 5.87 (d, *J* = 8.8 Hz, 2H), 2.99 (s, 3H).

**<sup>13</sup>C NMR (100 MHz, CDCl<sub>3</sub>):** δ 162.6 (d, *J*<sub>C-F</sub> = 243 Hz), 162.3 (d, *J*<sub>C-F</sub> = 244 Hz), 158.7, 149.0 (d, *J*<sub>C-F</sub> = 2 Hz), 148.2, 143.0 (d, *J*<sub>C-F</sub> = 8 Hz), 141.9, 140.5 (d, *J*<sub>C-F</sub> = 8 Hz), 129.3 (d, *J*<sub>C-F</sub> = 8 Hz), 129.0 (d, *J*<sub>C-F</sub> = 8 Hz), 127.2 (d, *J*<sub>C-F</sub> = 3 Hz), 126.1 (d, *J*<sub>C-F</sub> = 3 Hz), 124.1 (d, *J*<sub>C-F</sub> = 2 Hz), 123.5, 122.3, 121.4, 118.4 (d, *J*<sub>C-F</sub> = 21 Hz), 117.4 (d, *J*<sub>C-F</sub> = 22 Hz), 114.4 (d, *J*<sub>C-F</sub> = 21 Hz), 111.6, 101.9, 23.7.

**<sup>19</sup>F NMR (376 MHz, CDCl<sub>3</sub>):** δ -114.0, δ -114.5.

**IR (KBr, cm<sup>-1</sup>):** 2956, 2924, 2884, 2855, 1612, 1581, 1513, 1440, 1348, 1278, 1181, 1072.

**HRMS (ESI) m/z:** [M+H]<sup>+</sup> Calcd for C<sub>23</sub>H<sub>16</sub>F<sub>2</sub>NO<sub>2</sub>: 376.1149; Found 376.1152.

## 6. Copies of NMR spectra of the starting materials and products:

### 6.1 Copies of NMR spectra of the *O*-benzoyl oximes

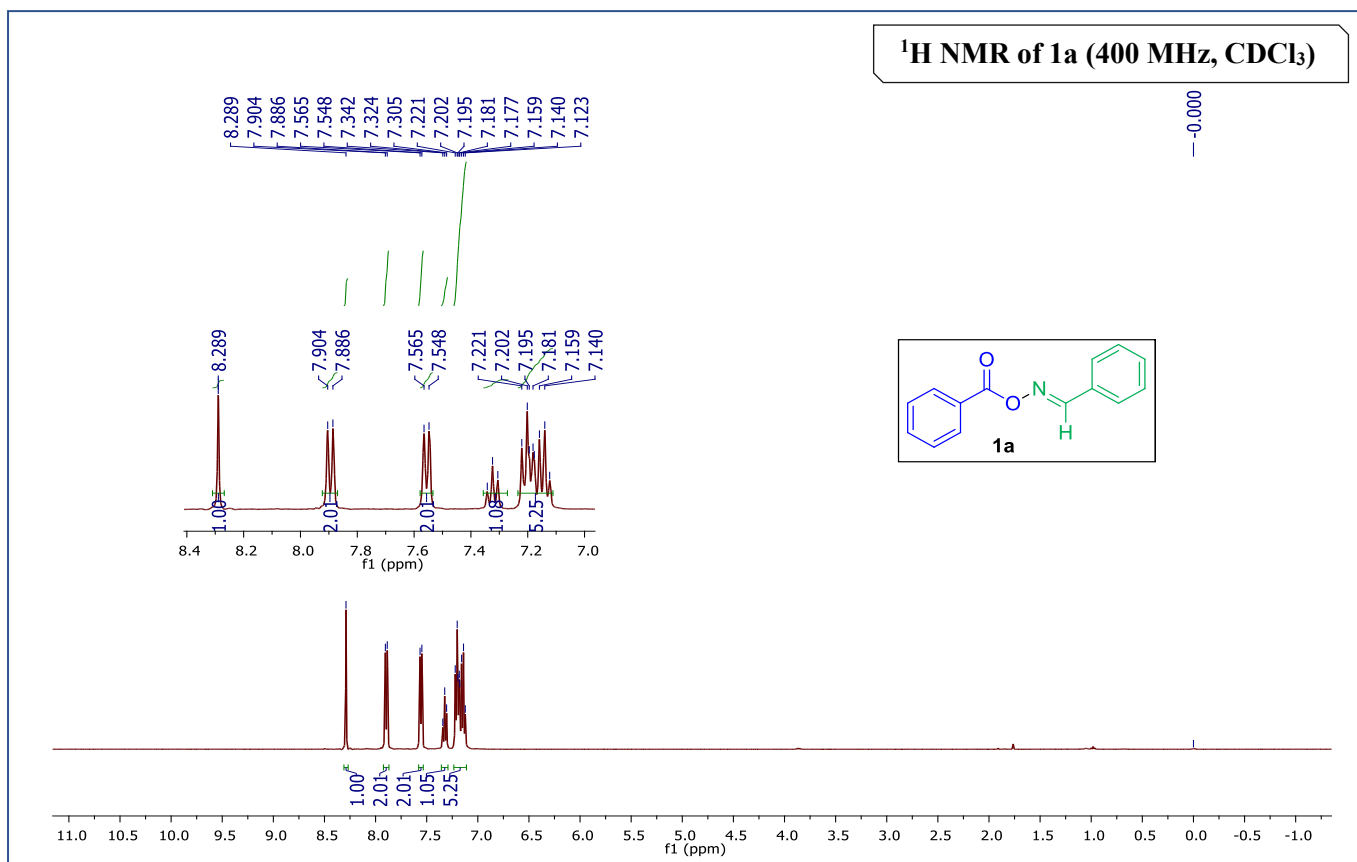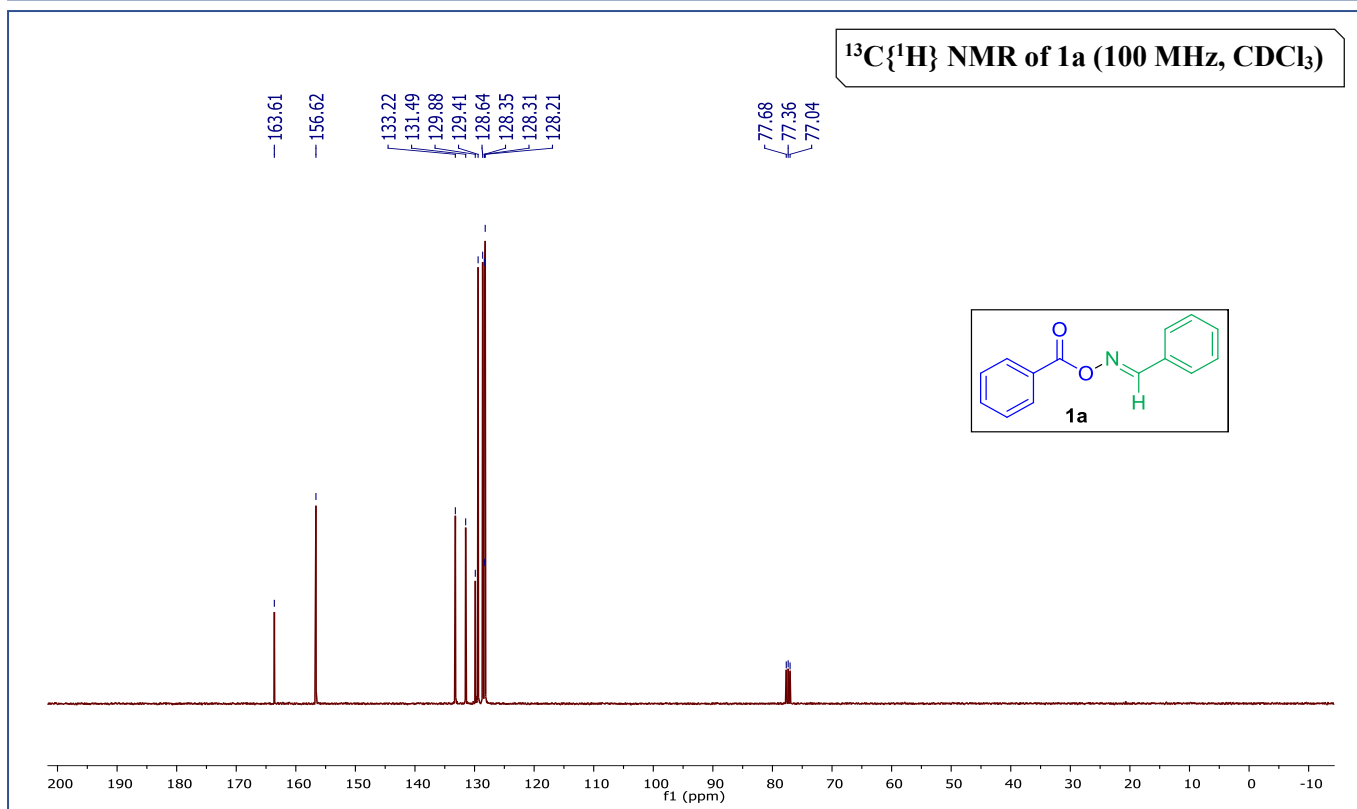

**<sup>1</sup>H NMR of 1b (400 MHz, CDCl<sub>3</sub>)**

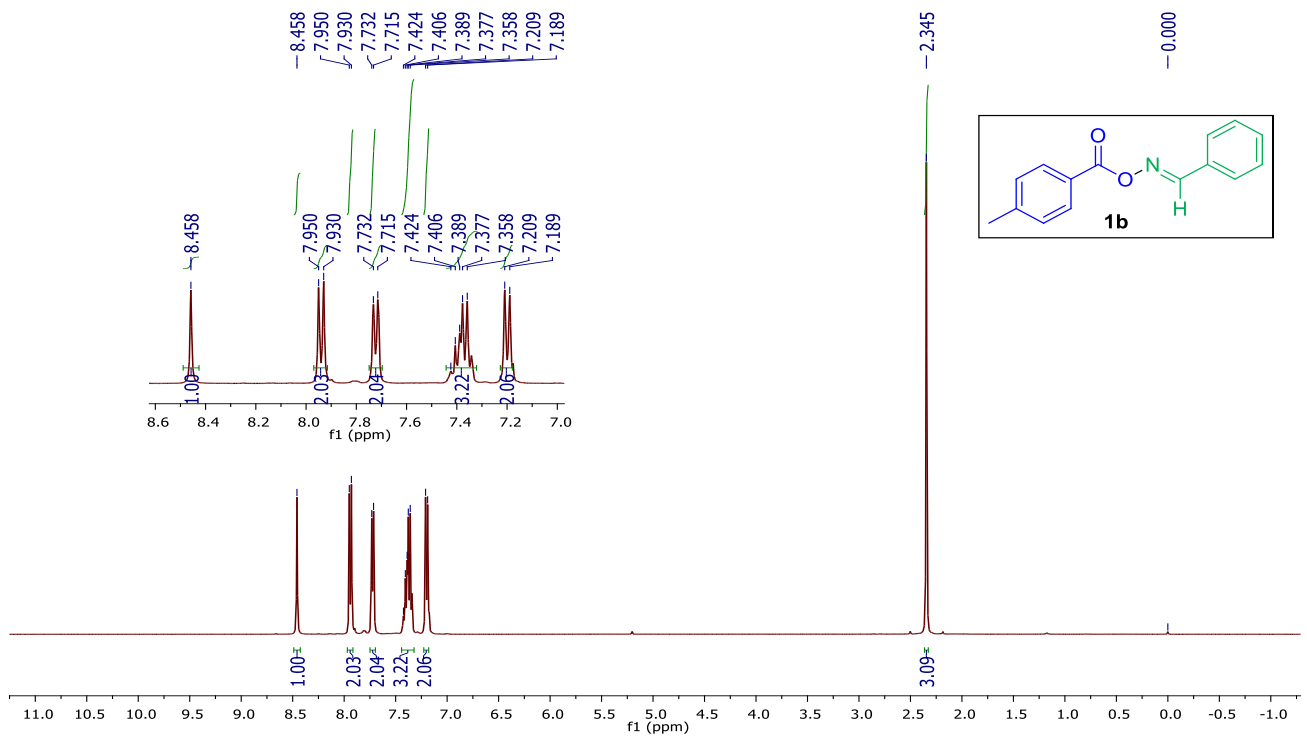

**<sup>13</sup>C{<sup>1</sup>H} NMR of 1b (100 MHz, CDCl<sub>3</sub>)**

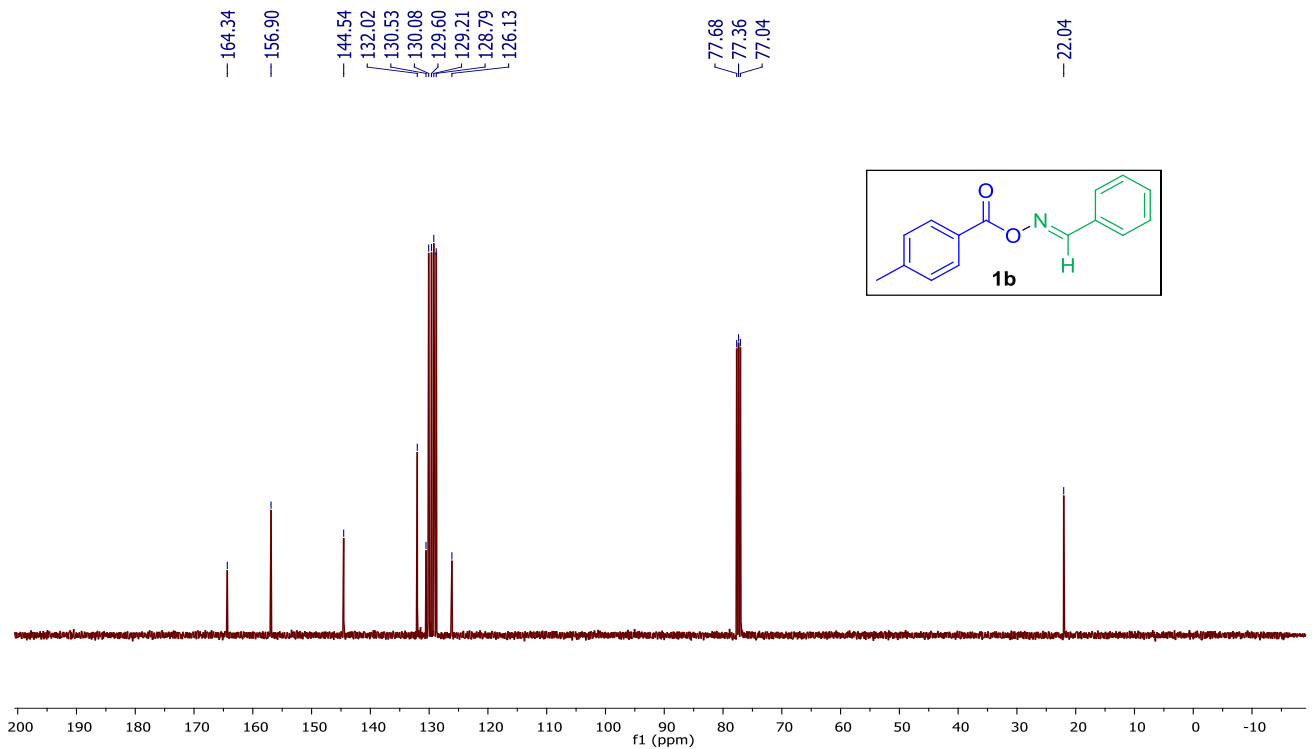

**<sup>1</sup>H NMR of 1c (700 MHz, CDCl<sub>3</sub>)**

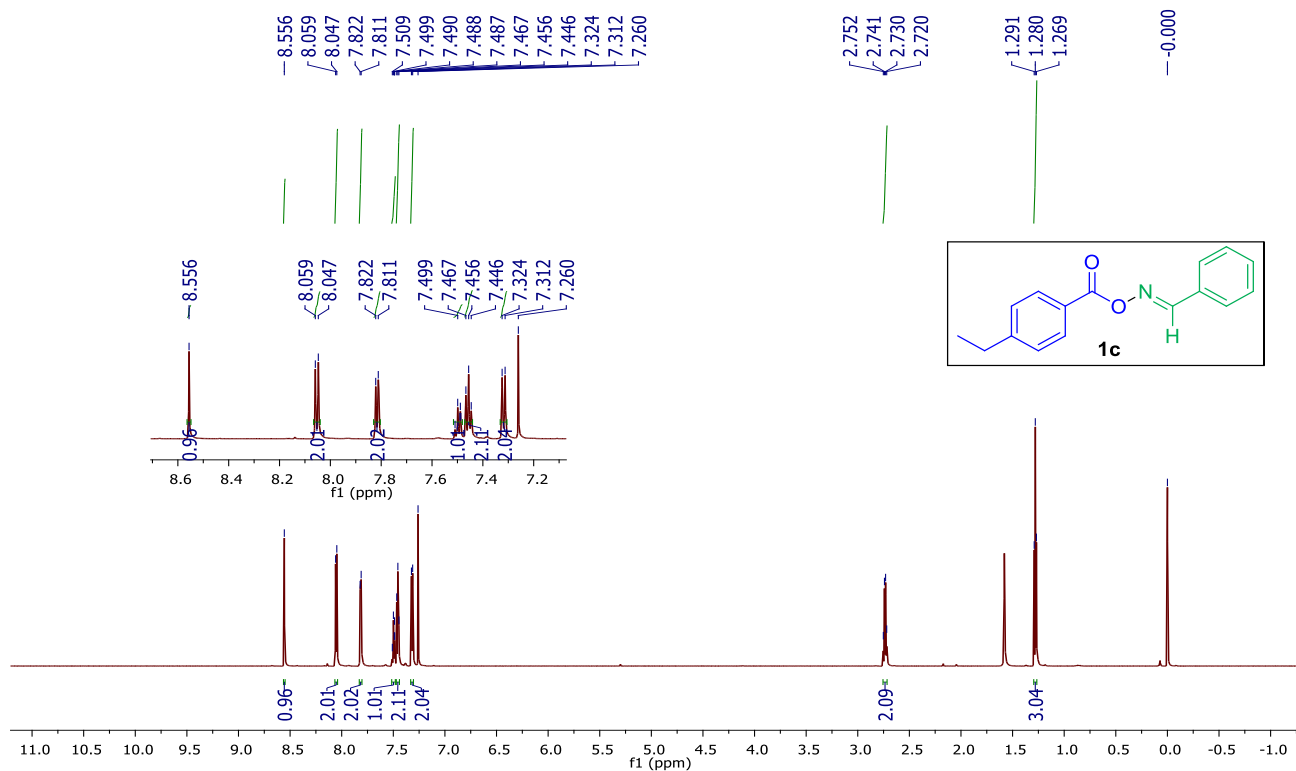

**<sup>13</sup>C{<sup>1</sup>H} NMR of 1c (176 MHz, CDCl<sub>3</sub>)**

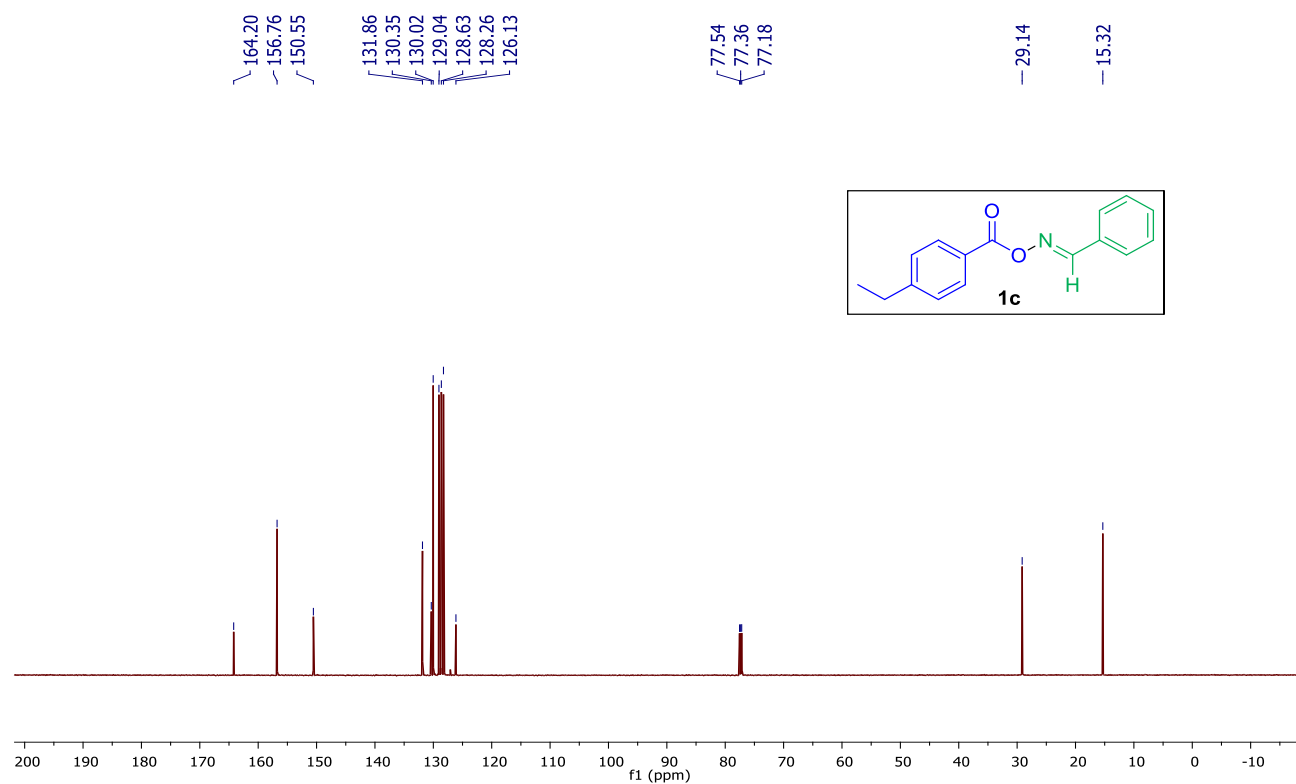

**<sup>1</sup>H NMR of 1d (400 MHz, CDCl<sub>3</sub>)**

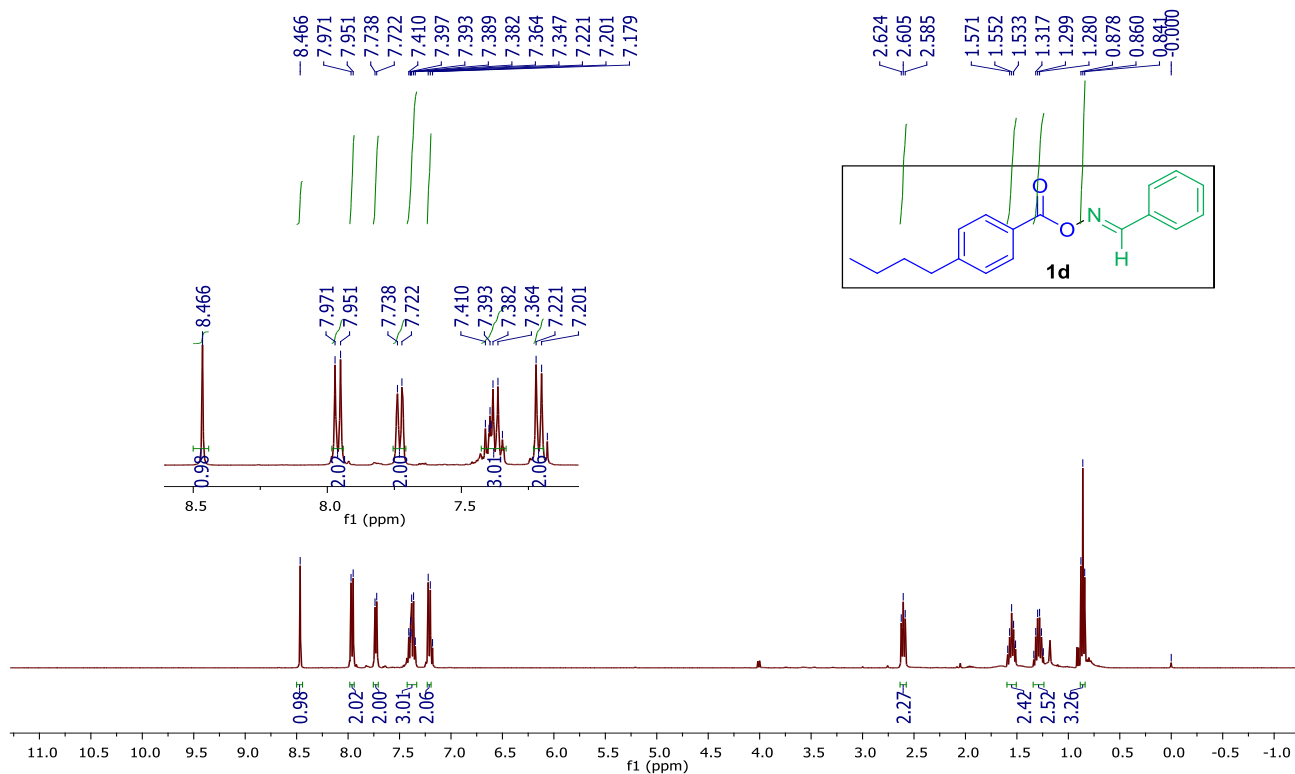

**<sup>13</sup>C{<sup>1</sup>H} NMR of 1d (100 MHz, CDCl<sub>3</sub>)**

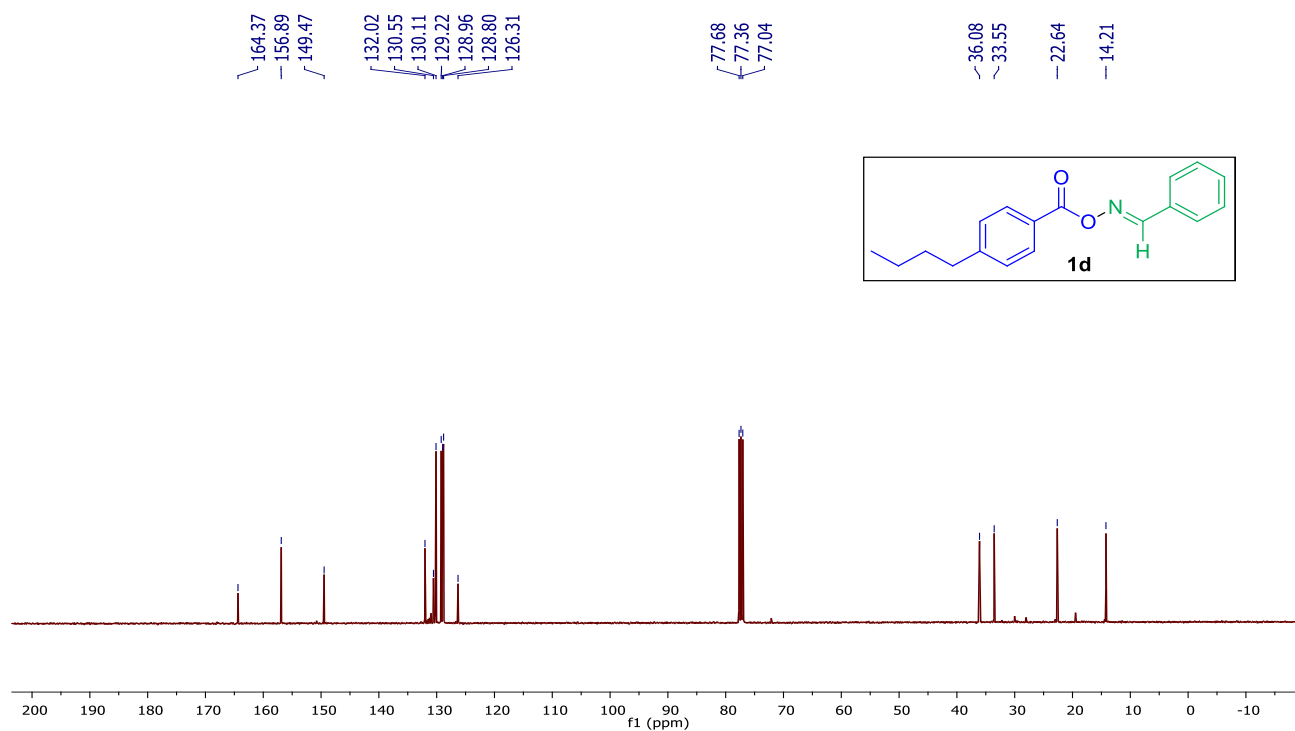

**<sup>1</sup>H NMR of 1e (400 MHz, CDCl<sub>3</sub>)**

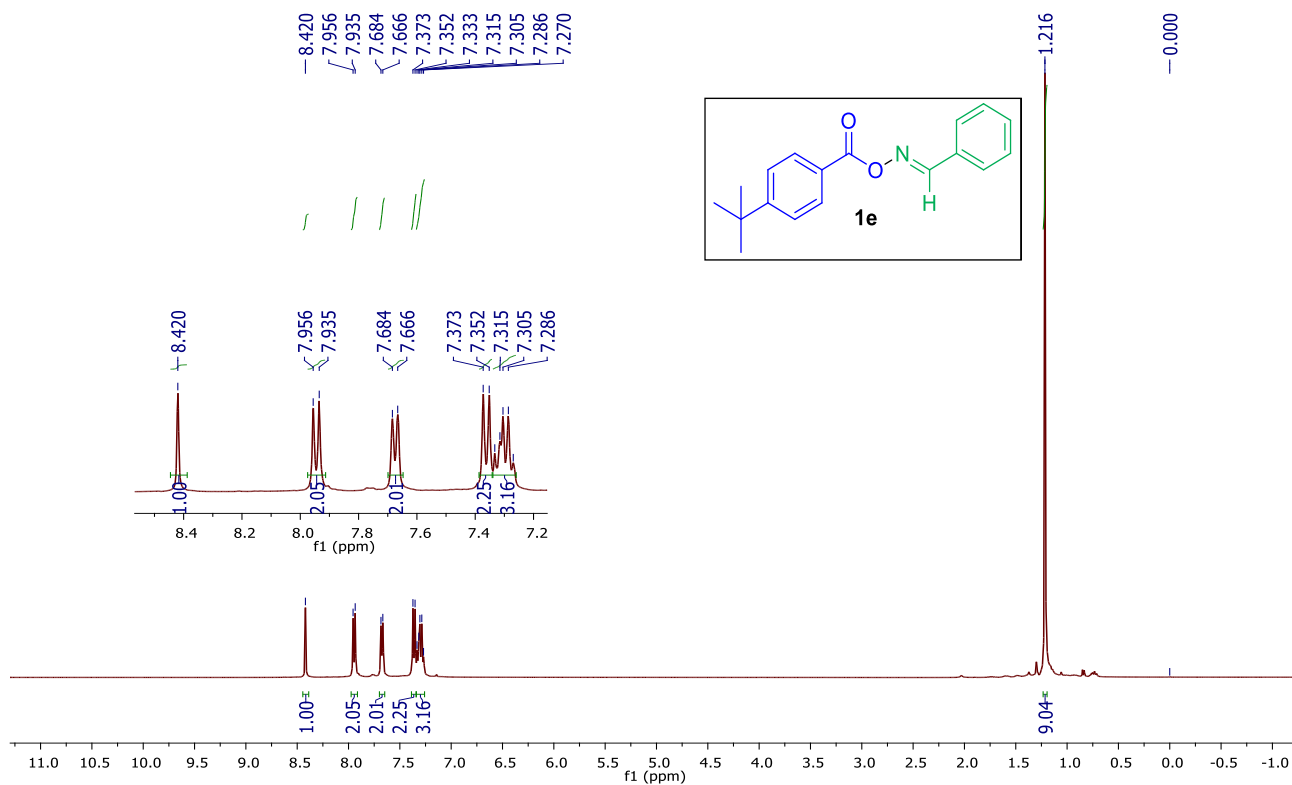

**<sup>13</sup>C{<sup>1</sup>H} NMR of 1e (100 MHz, CDCl<sub>3</sub>)**

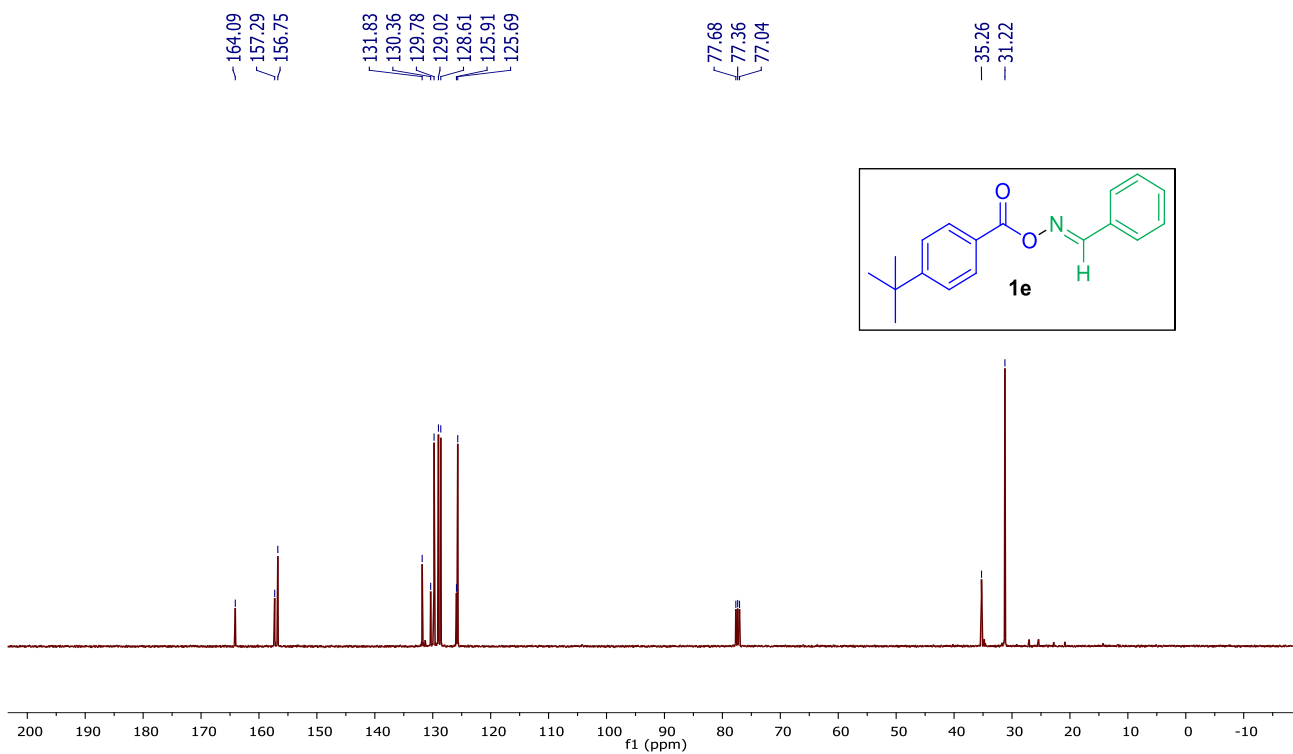

<sup>1</sup>H NMR of 1f (400 MHz, CDCl<sub>3</sub>)

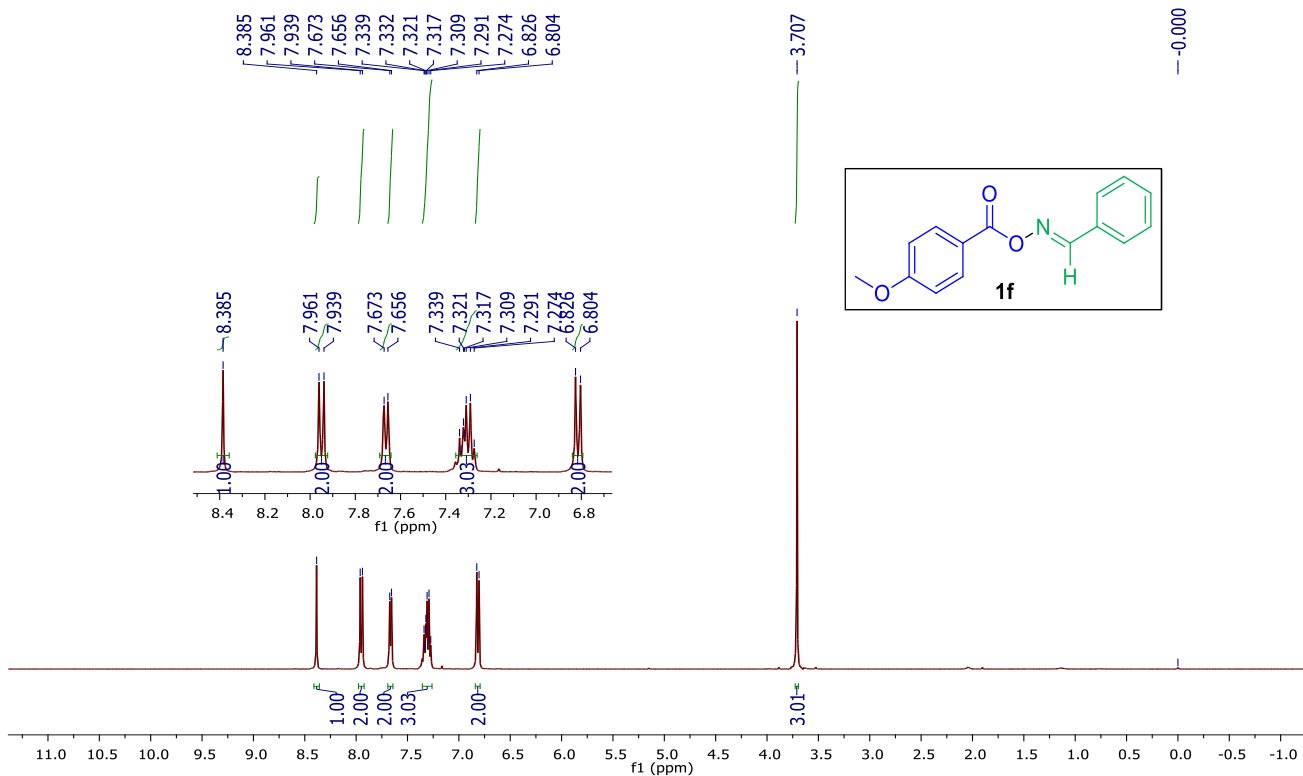

<sup>13</sup>C{<sup>1</sup>H} NMR of 1f (100 MHz, CDCl<sub>3</sub>)

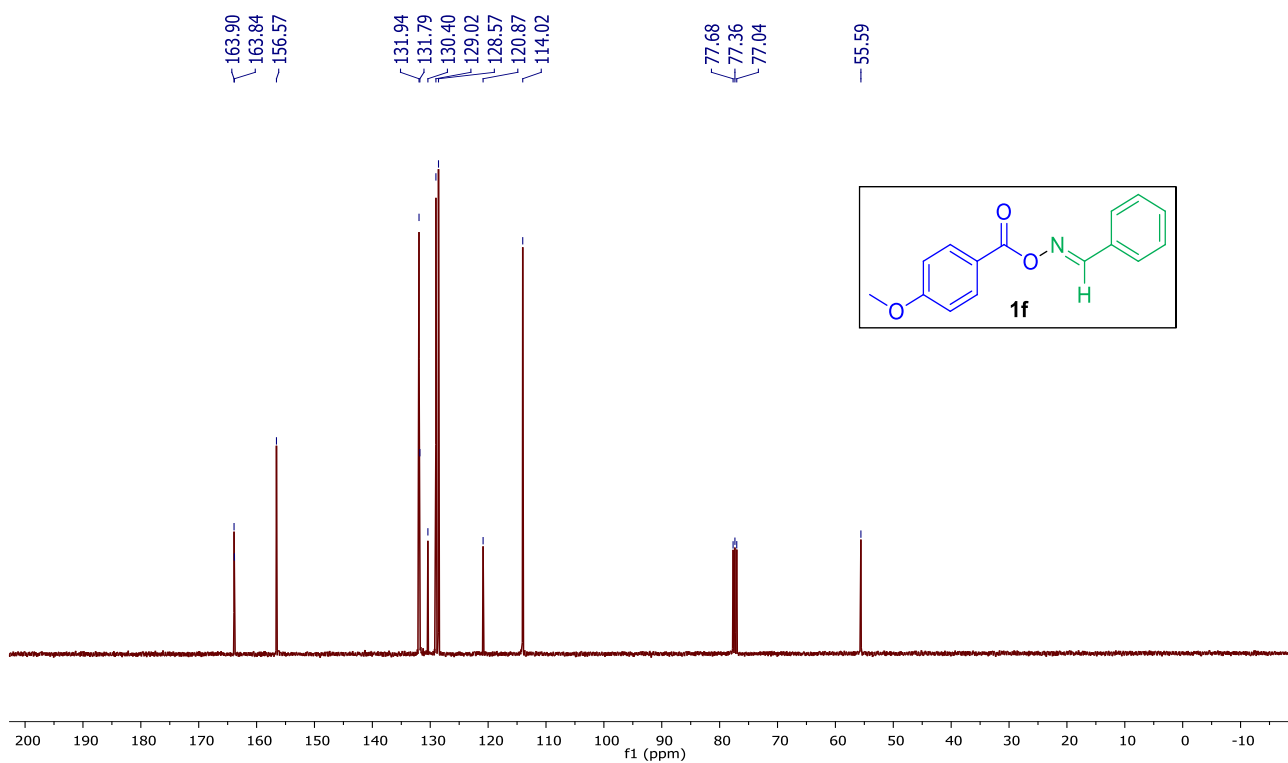

**<sup>1</sup>H NMR of 1g (400 MHz, CDCl<sub>3</sub>)**

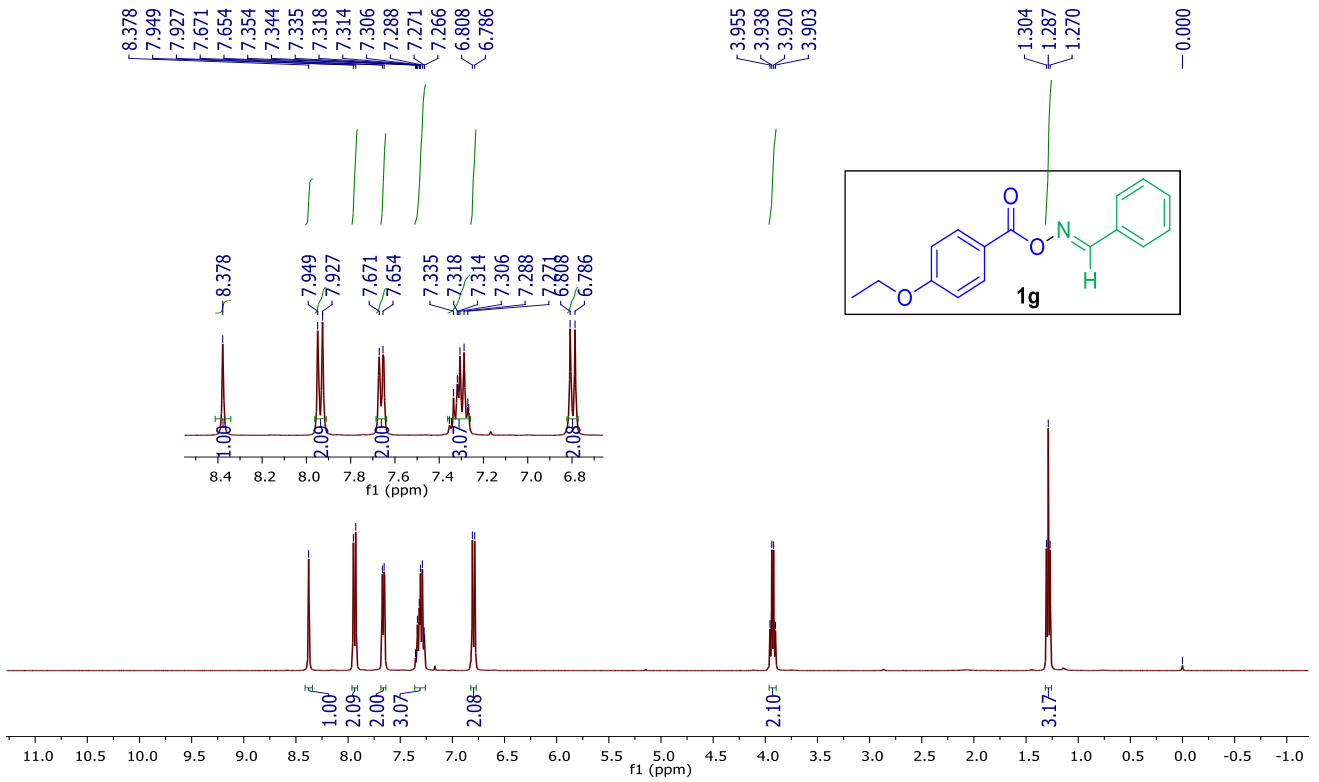

**<sup>13</sup>C{<sup>1</sup>H} NMR of 1g (100 MHz, CDCl<sub>3</sub>)**

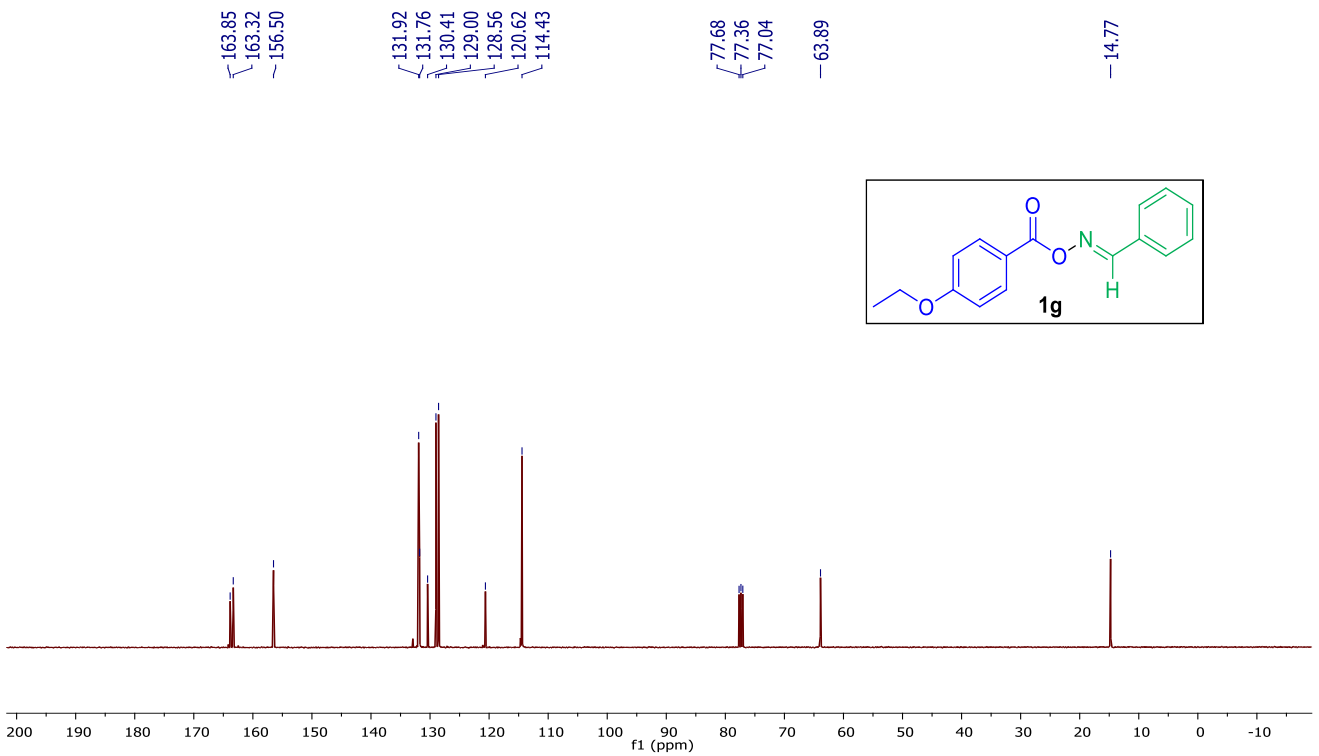

<sup>1</sup>H NMR of 1h (400 MHz, CDCl<sub>3</sub>)

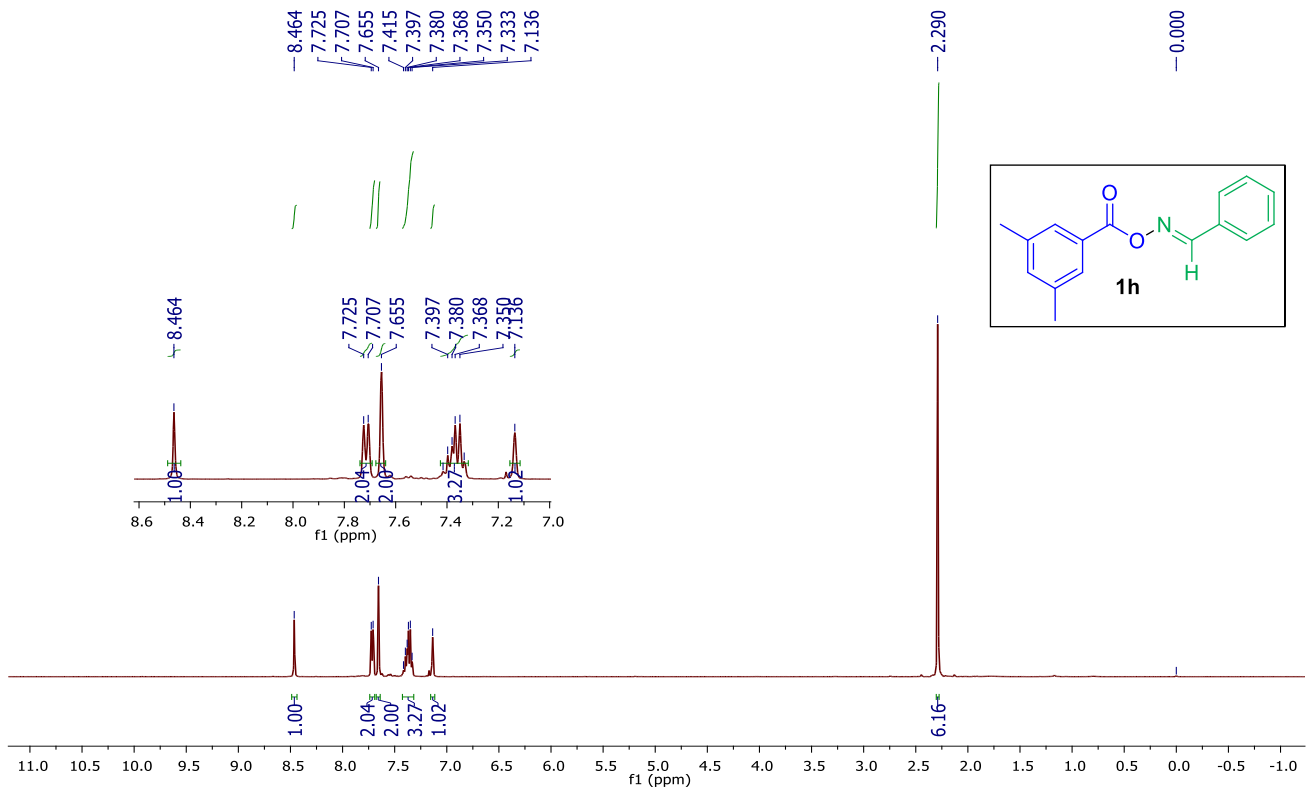

<sup>13</sup>C{<sup>1</sup>H} NMR of 1h (100 MHz, CDCl<sub>3</sub>)

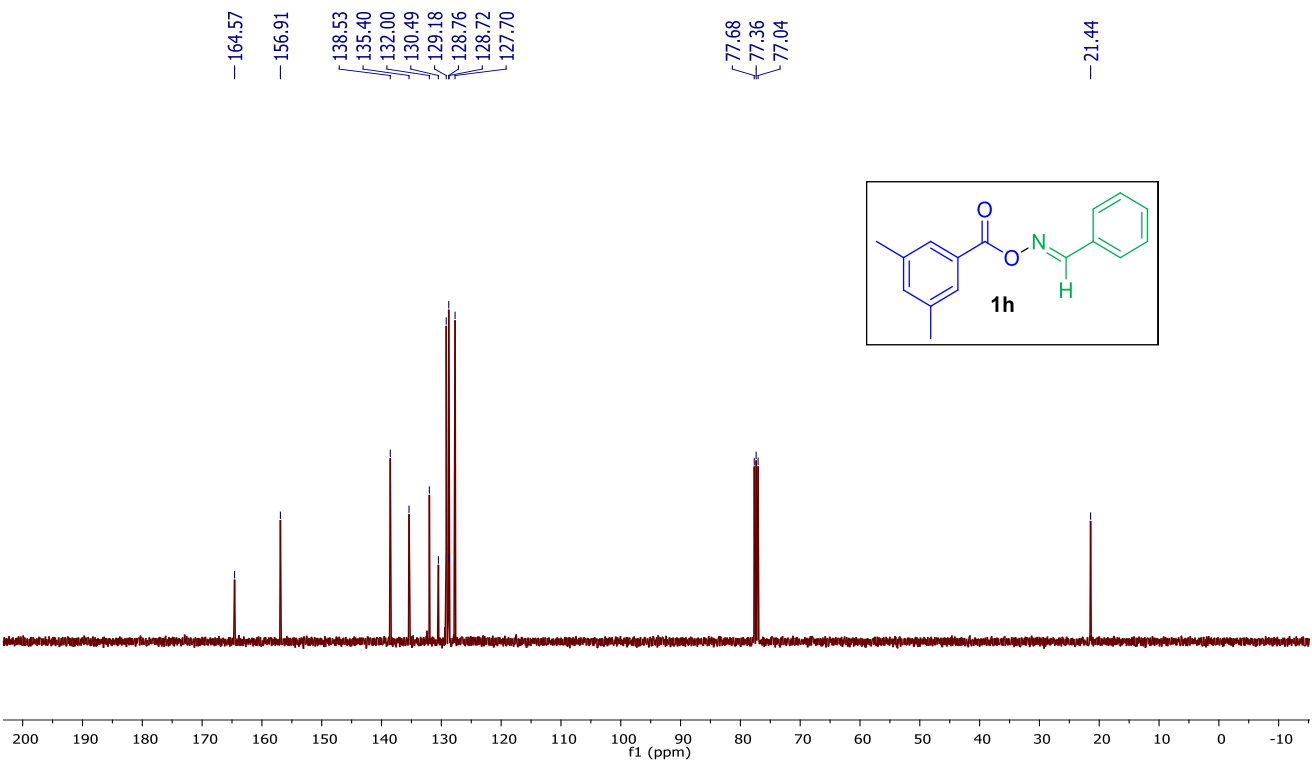

<sup>1</sup>H NMR of **1i** (400 MHz, CDCl<sub>3</sub>)

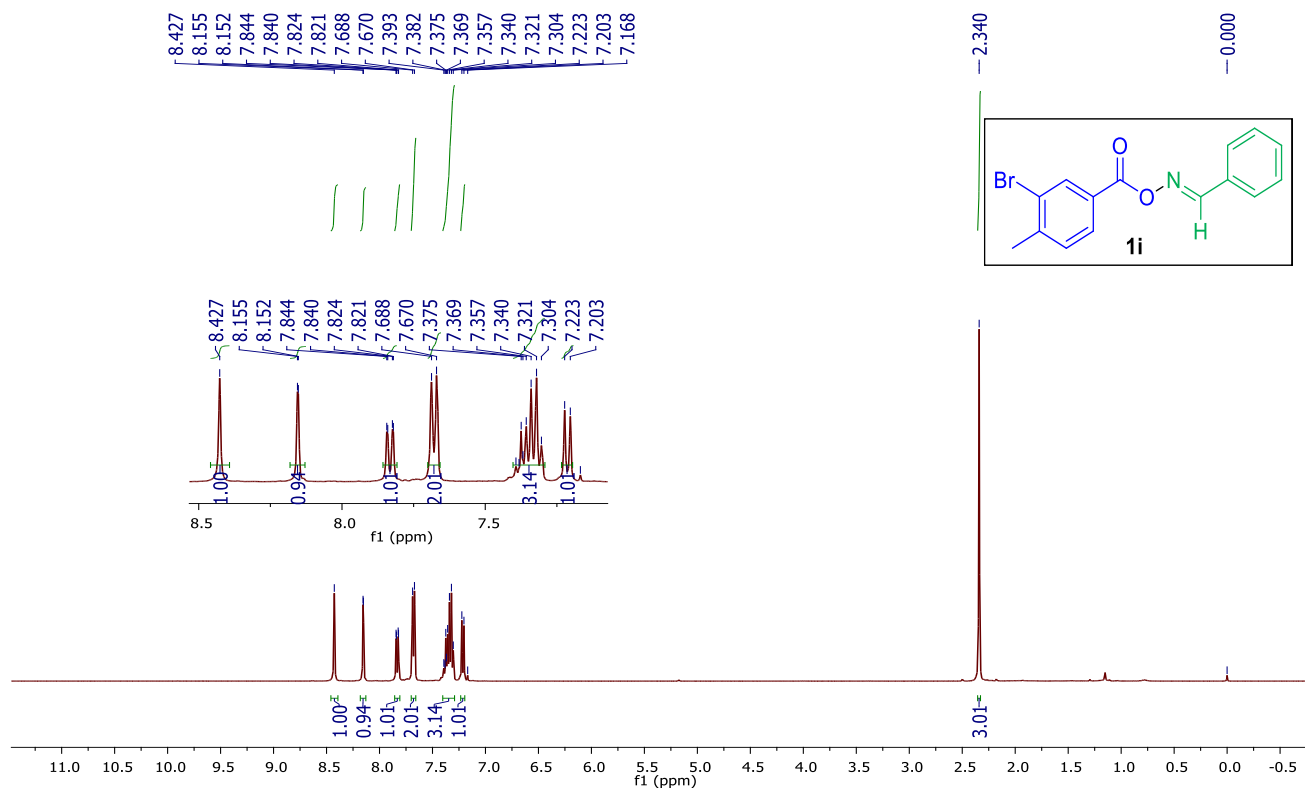

<sup>13</sup>C{<sup>1</sup>H} NMR of **1i** (100 MHz, CDCl<sub>3</sub>)

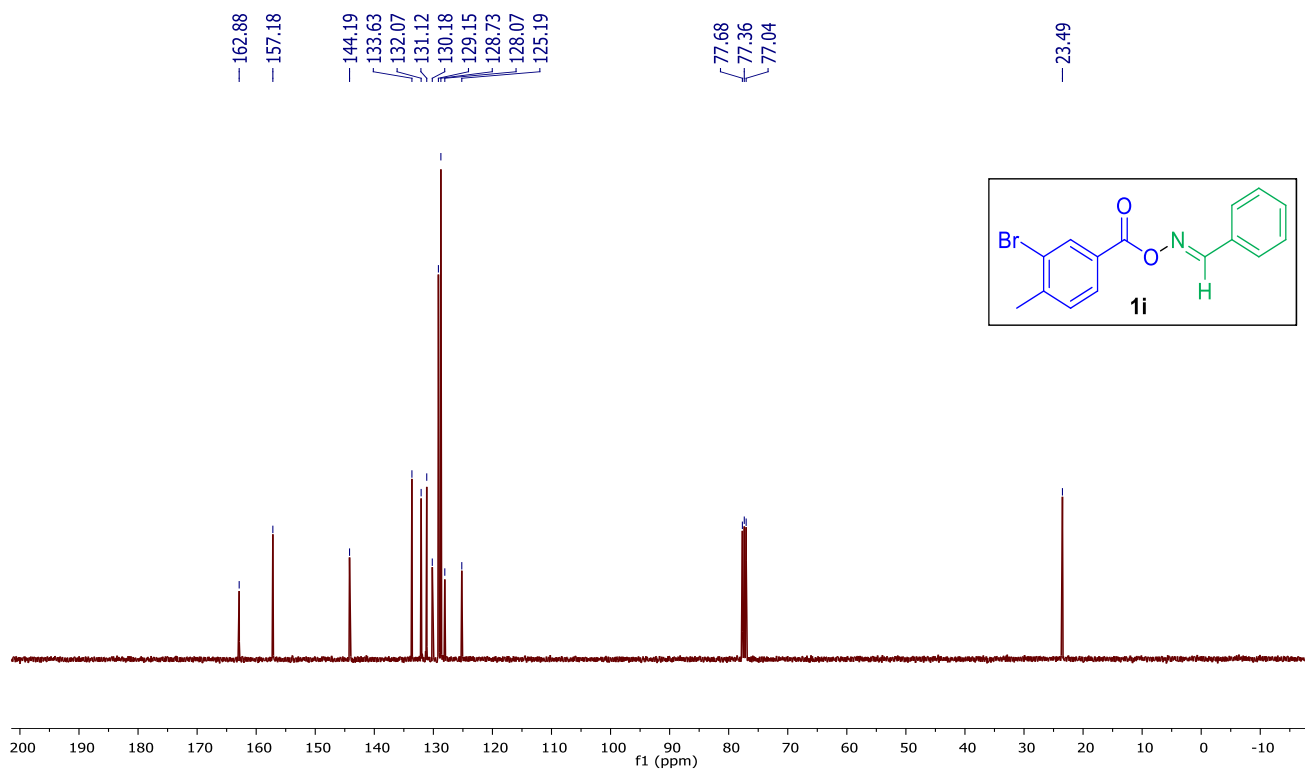

**<sup>1</sup>H NMR of 1j (400 MHz, CDCl<sub>3</sub>)**

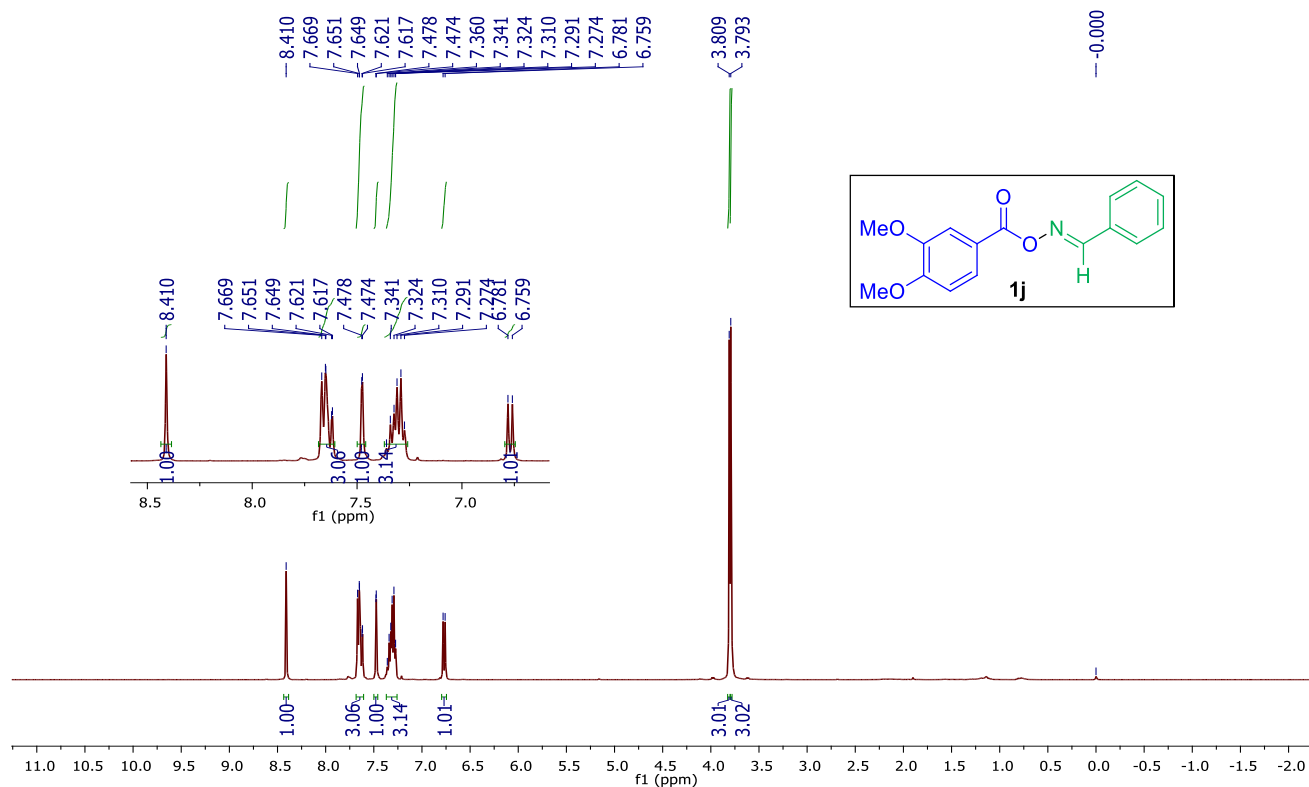

**<sup>13</sup>C{<sup>1</sup>H} NMR of 1j (100 MHz, CDCl<sub>3</sub>)**

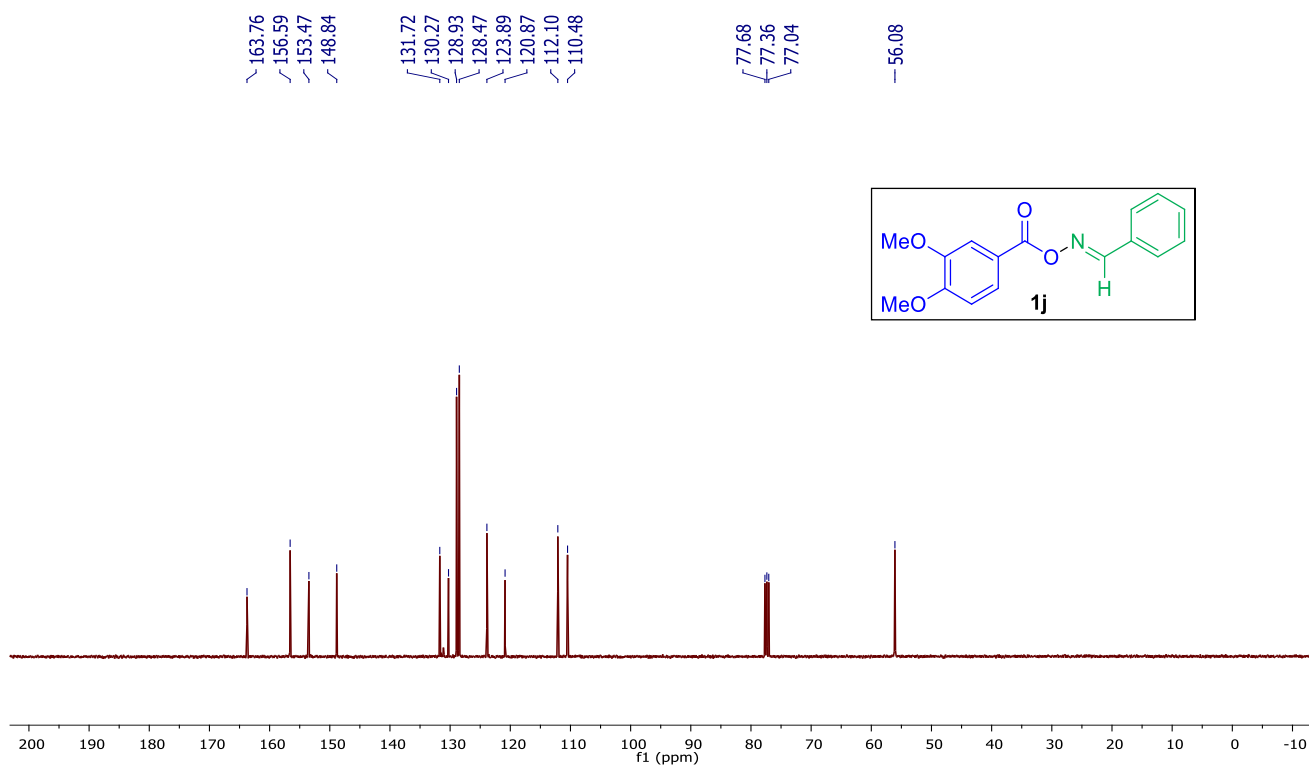

<sup>1</sup>H NMR of 1k (400 MHz, CDCl<sub>3</sub>)

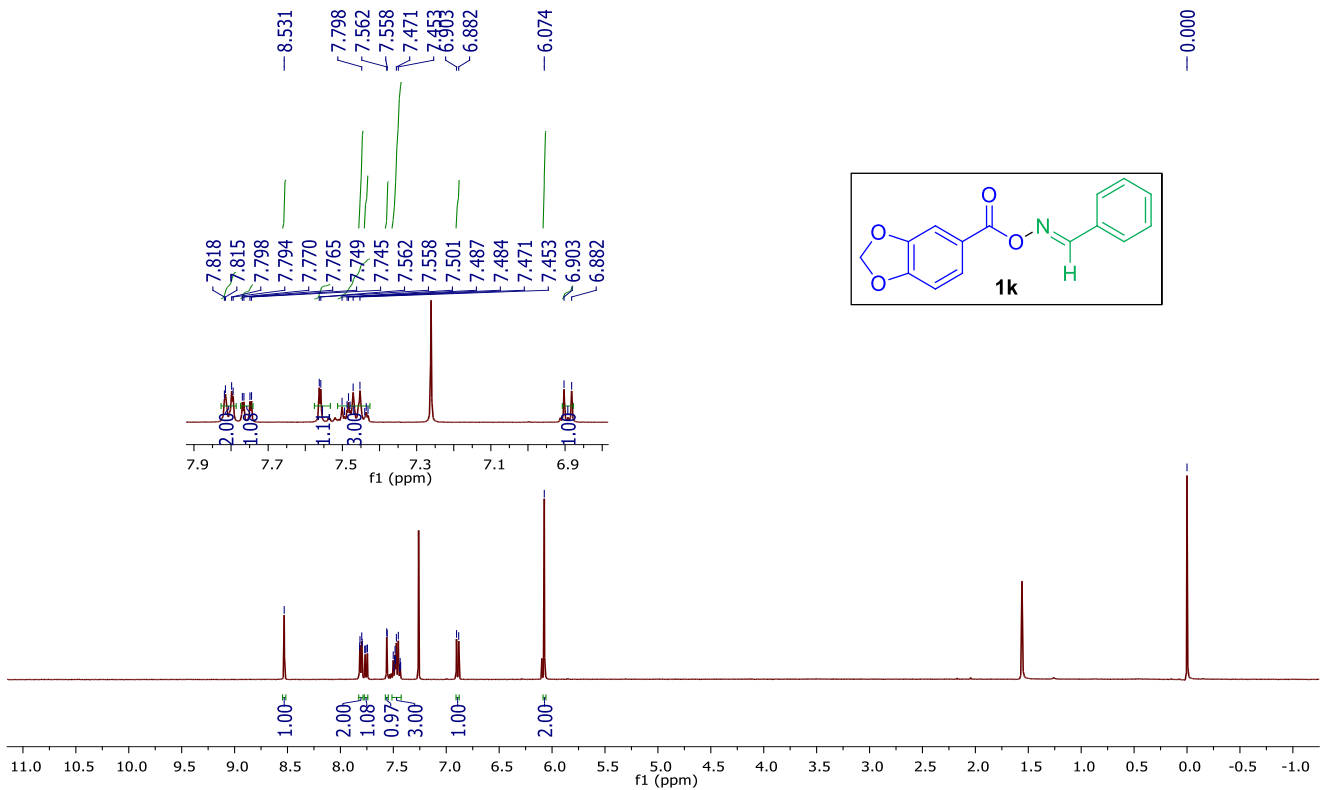

<sup>13</sup>C{<sup>1</sup>H} NMR of 1k (176 MHz, CDCl<sub>3</sub>)

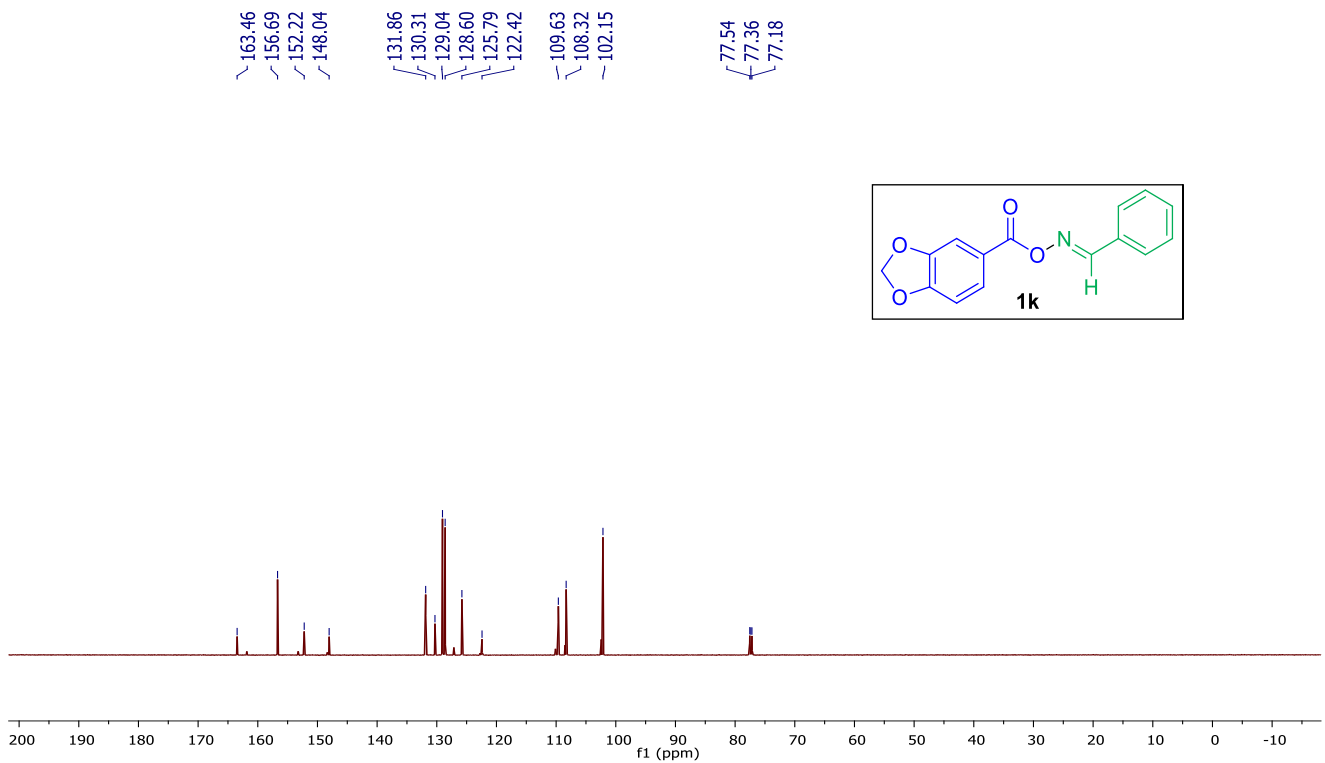

**<sup>1</sup>H NMR of 11 (400 MHz, CDCl<sub>3</sub>)**

8.778  
8.756  
8.387  
8.064  
8.062  
8.045  
7.882  
7.861  
7.735  
7.715  
7.675  
7.658  
7.655  
7.503  
7.500  
7.486  
7.483  
7.465  
7.462  
7.408  
7.406  
7.388  
7.370  
7.361  
7.342  
7.326  
7.322  
7.309  
7.305  
7.298  
7.279  
7.263  
7.258  
7.103

-0.000

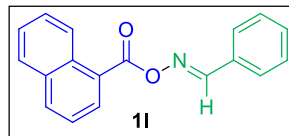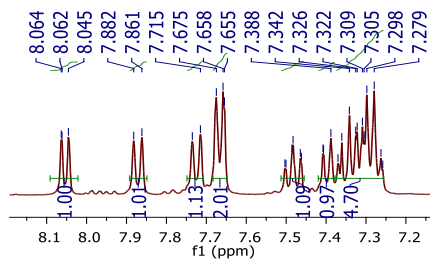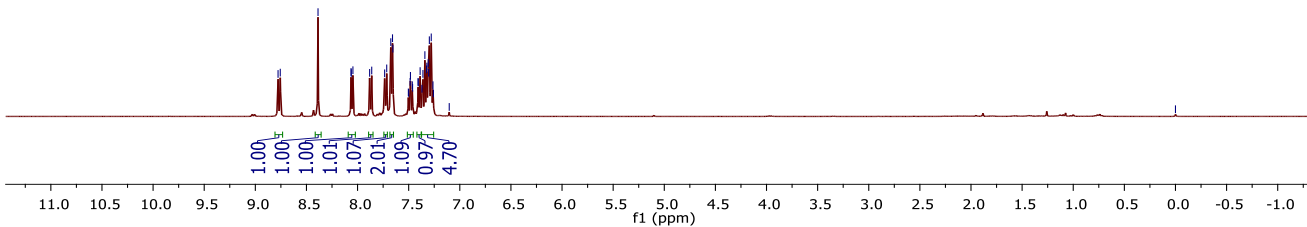

**<sup>13</sup>C{<sup>1</sup>H} NMR of 11 (100 MHz, CDCl<sub>3</sub>)**

165.05  
157.04  
134.01  
133.94  
131.99  
131.53  
130.33  
130.14  
129.12  
128.82  
128.68  
128.22  
126.66  
125.86  
125.79  
124.64

77.68  
77.36  
77.04

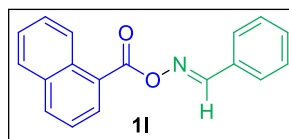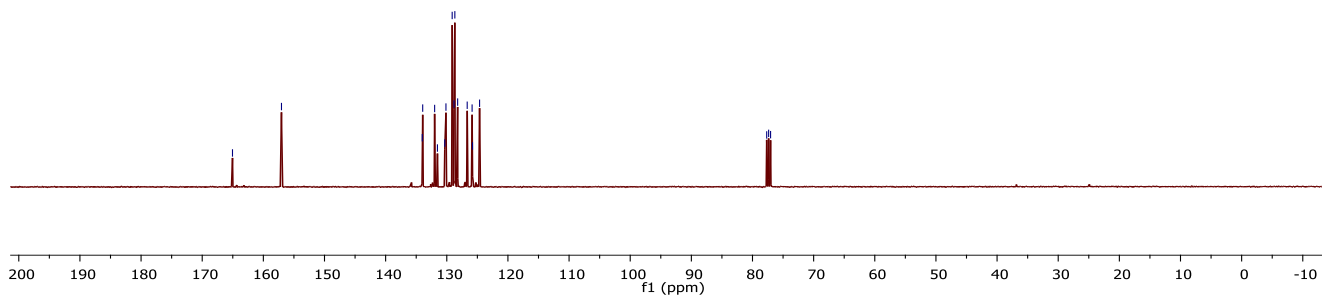

**<sup>1</sup>H NMR of 1m (400 MHz, CDCl<sub>3</sub>)**

8.451  
8.075  
8.072  
8.061  
8.057  
8.049  
8.040  
7.719  
7.702  
7.424  
7.406  
7.402  
7.391  
7.388  
7.384  
7.372  
7.354  
7.336  
7.176  
7.088  
7.083  
7.066  
7.063  
7.045  
7.041

-0.000

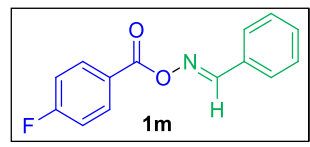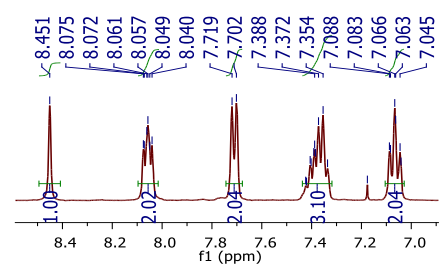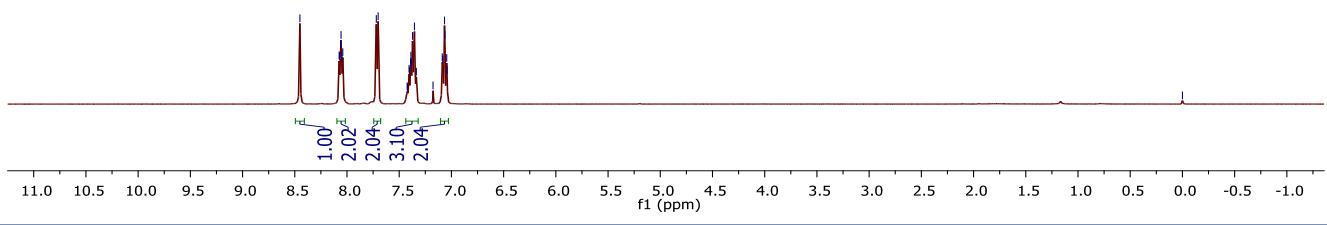

**<sup>13</sup>C{<sup>1</sup>H} NMR of 1m (100 MHz, CDCl<sub>3</sub>)**

167.56  
165.02  
163.28  
157.18  
132.66  
132.56  
132.15  
130.30  
129.23  
128.80  
125.16  
125.13  
116.21  
115.99

77.68  
77.36  
77.04

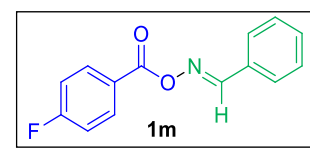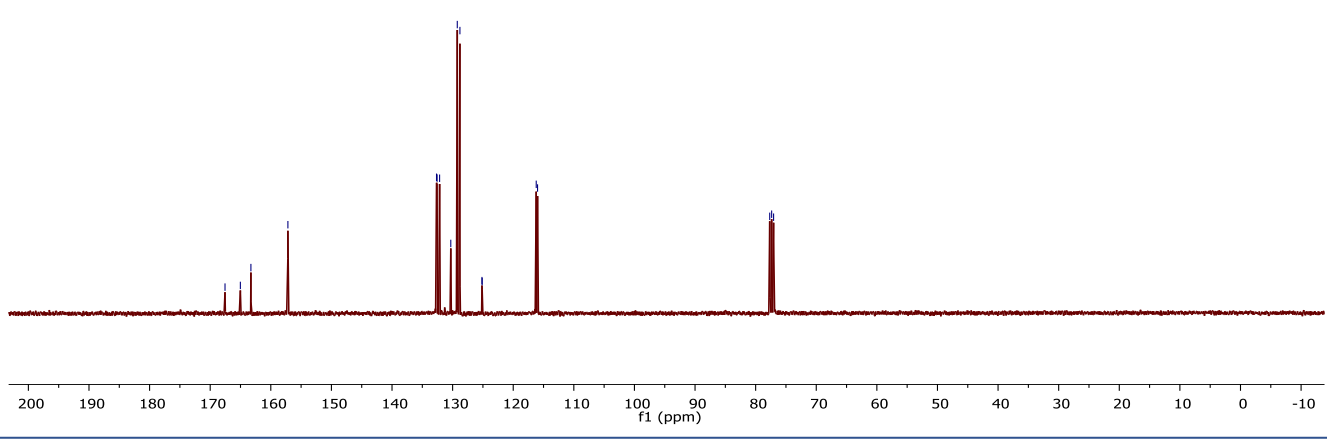

<sup>1</sup>H NMR of 1n (400 MHz, CDCl<sub>3</sub>)

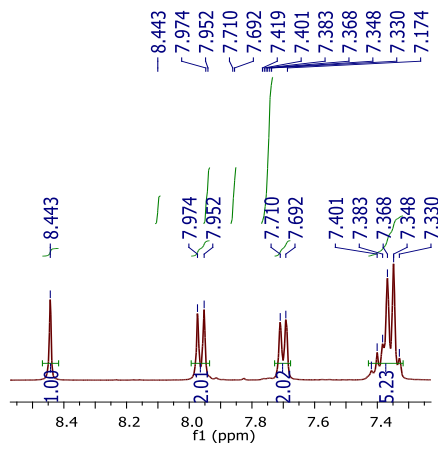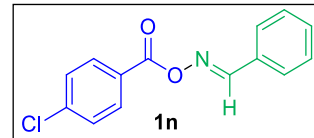

-0.000

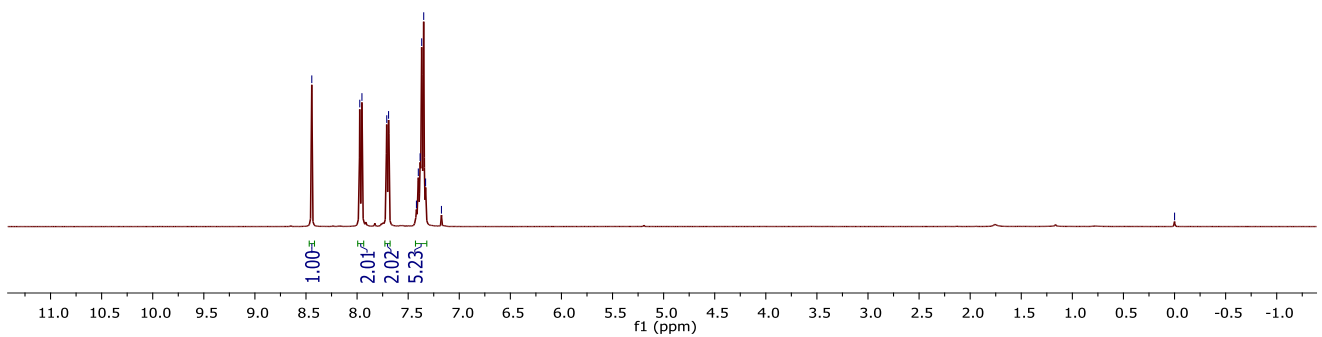

<sup>13</sup>C{<sup>1</sup>H} NMR of 1n (100 MHz, CDCl<sub>3</sub>)

163.37  
157.28  
140.20  
132.17  
131.36  
130.22  
129.22  
128.79  
127.33

77.68  
77.36  
77.04

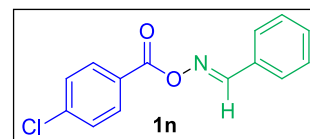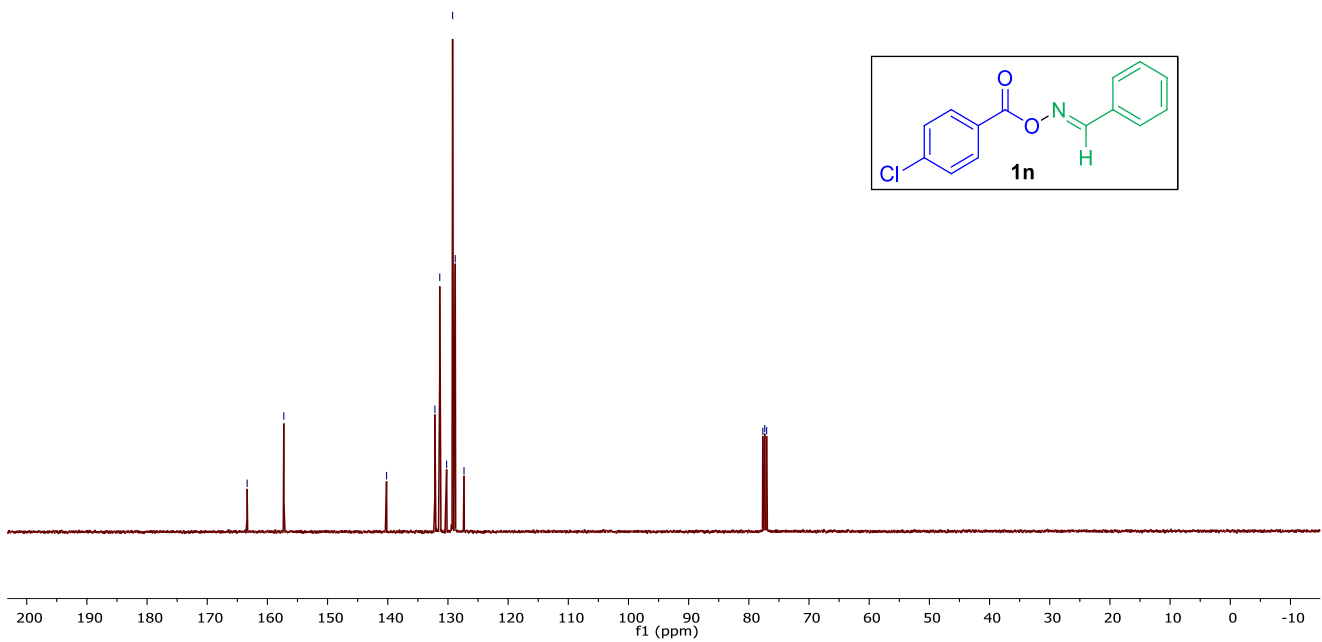

<sup>1</sup>H NMR of 1o (400 MHz, CDCl<sub>3</sub>)

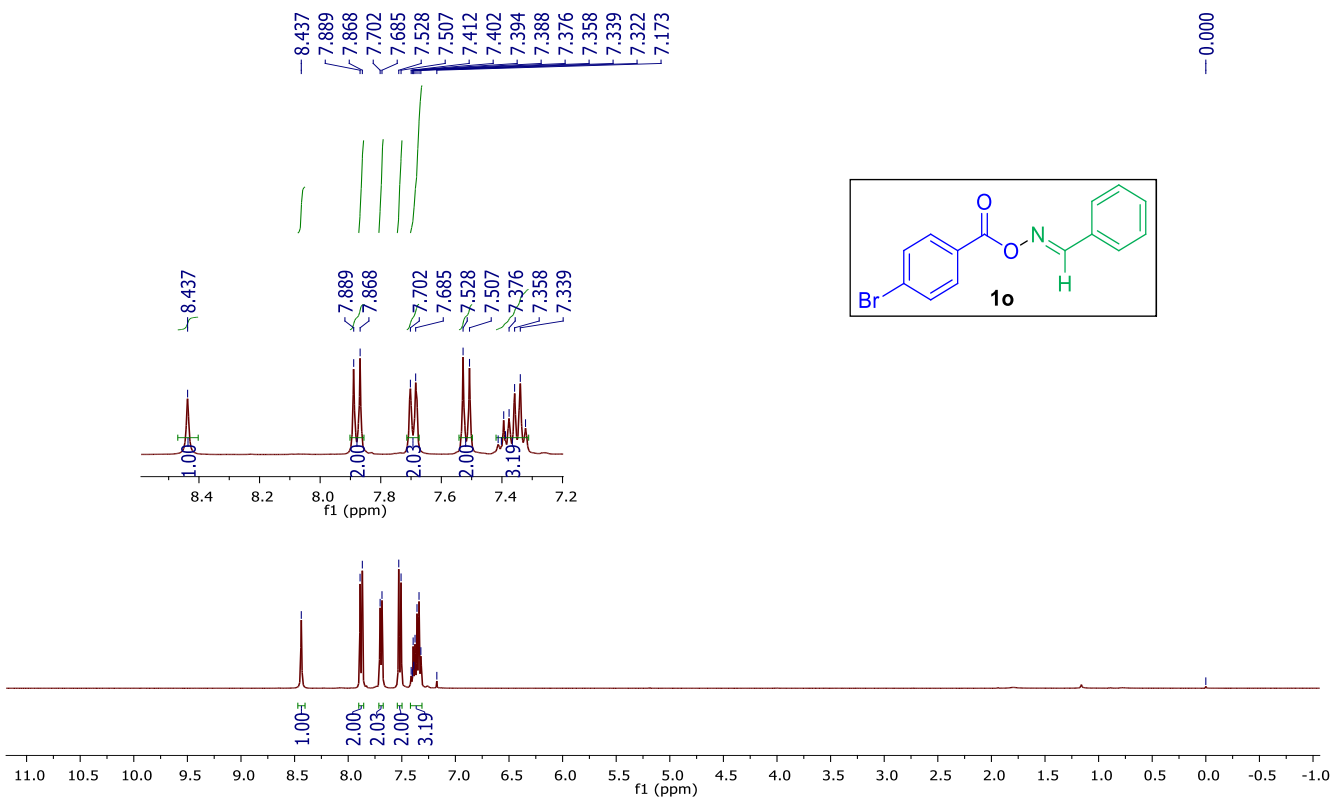

<sup>13</sup>C{<sup>1</sup>H} NMR of 1o (100 MHz, CDCl<sub>3</sub>)

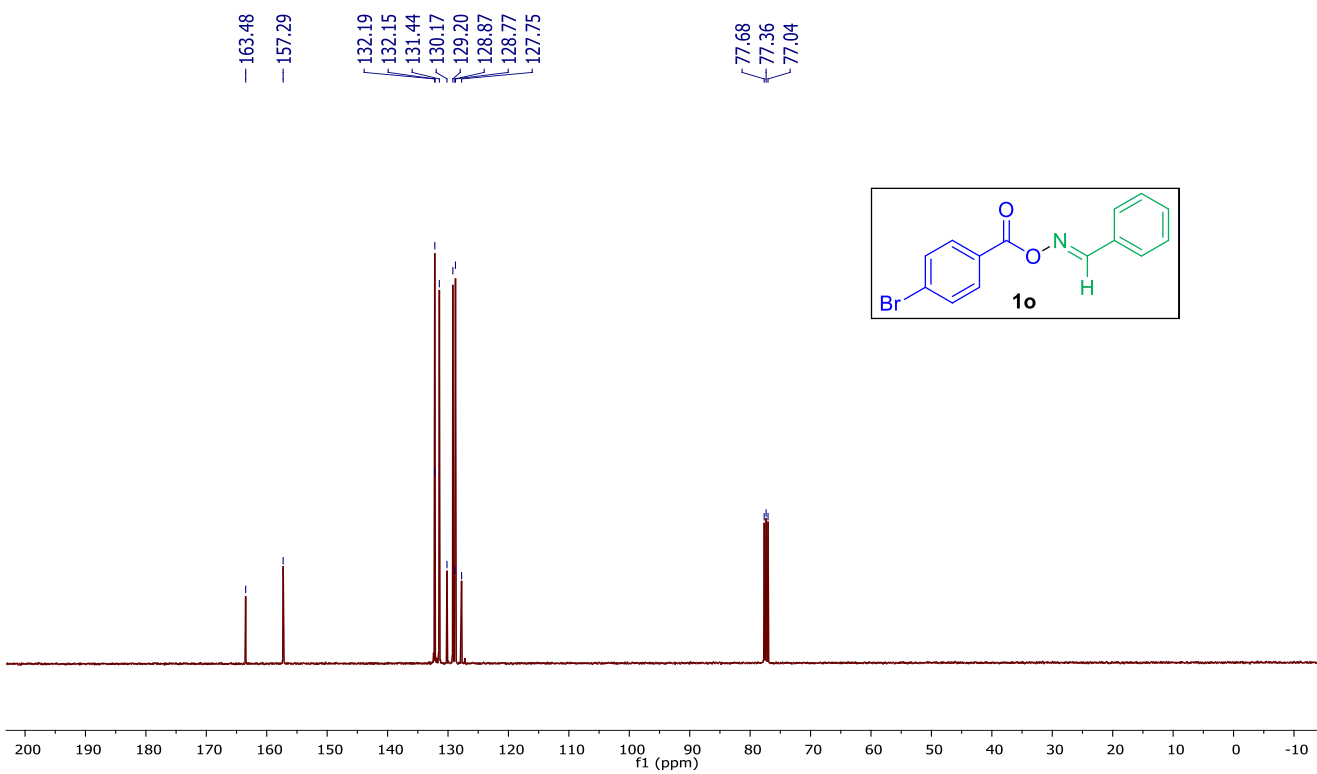

**<sup>1</sup>H NMR of 1p (400 MHz, CDCl<sub>3</sub>)**

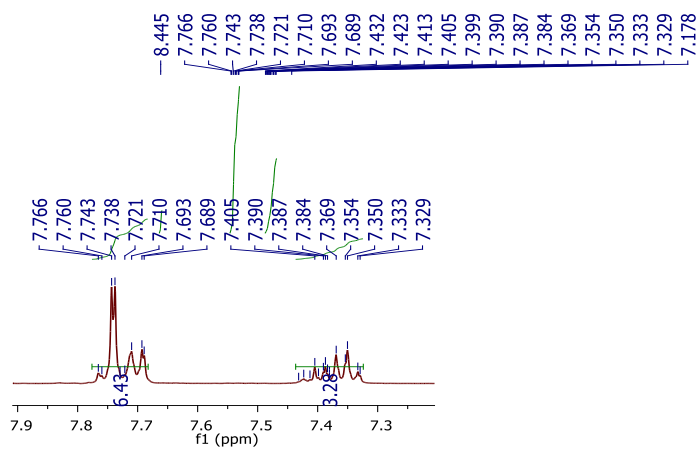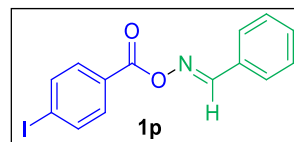

— 0.000

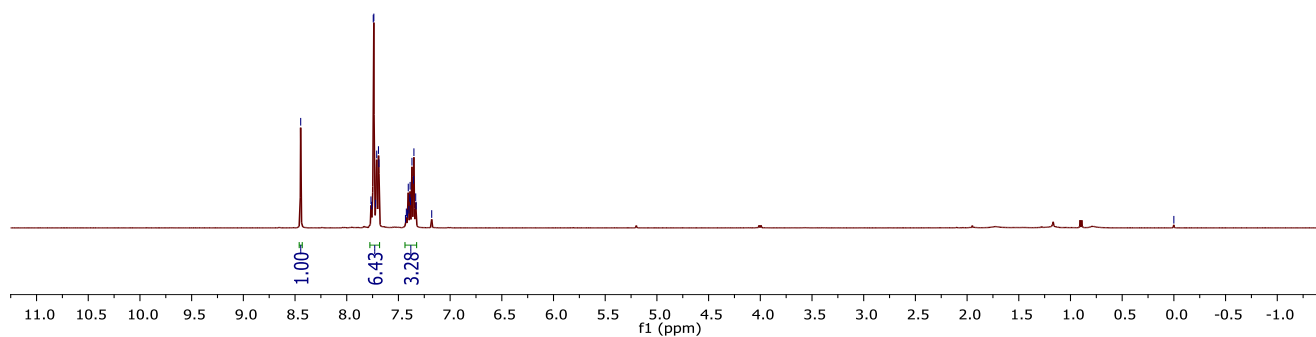

**<sup>13</sup>C{<sup>1</sup>H} NMR of 1p (100 MHz, CDCl<sub>3</sub>)**

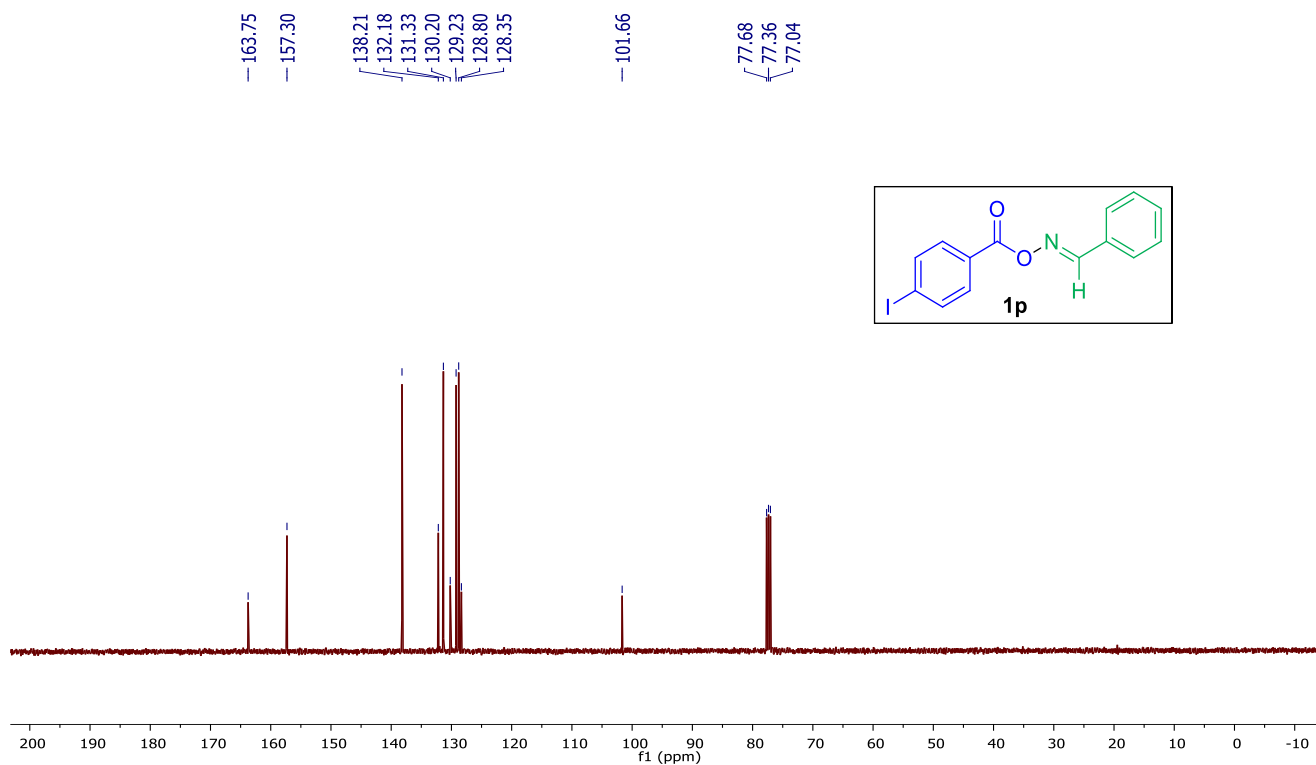

<sup>1</sup>H NMR of 1q (400 MHz, CDCl<sub>3</sub>)

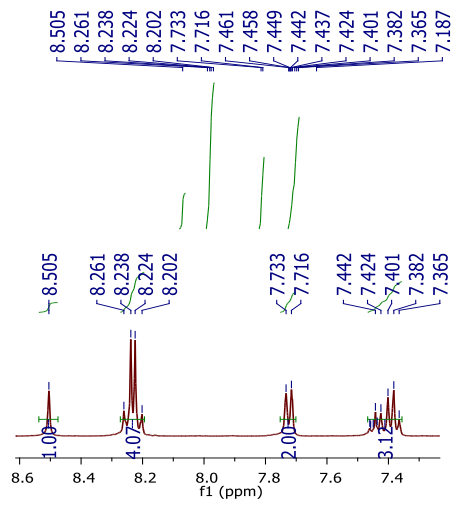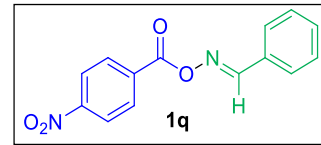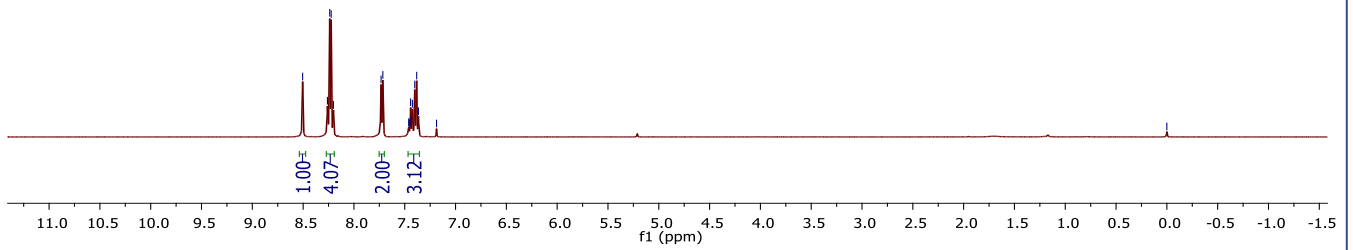

<sup>13</sup>C{<sup>1</sup>H} NMR of 1q (100 MHz, CDCl<sub>3</sub>)

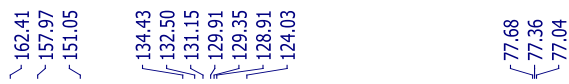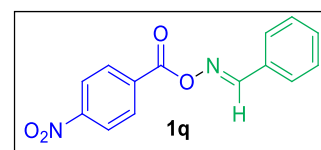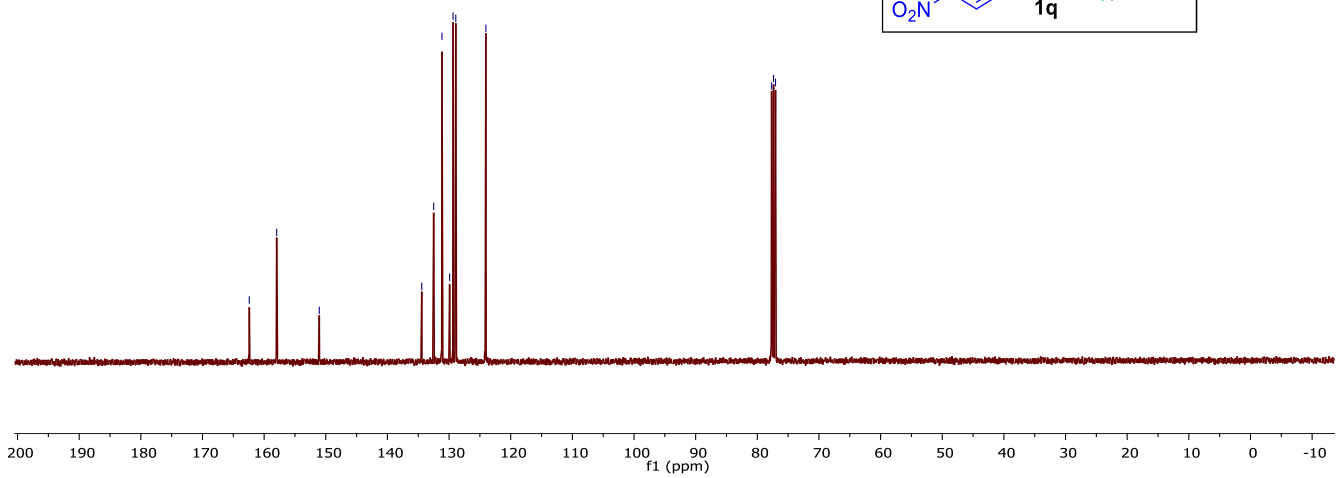

**<sup>1</sup>H NMR of 1r (400 MHz, CDCl<sub>3</sub>)**

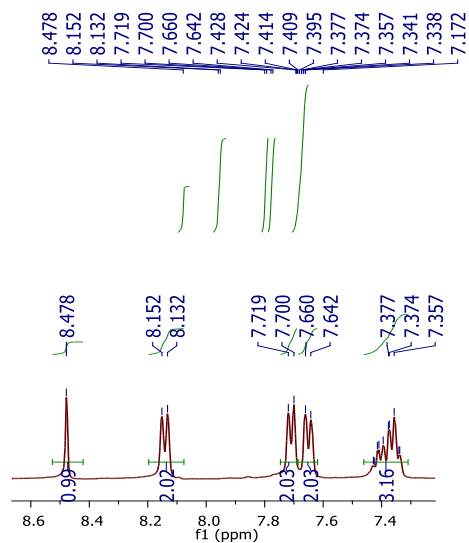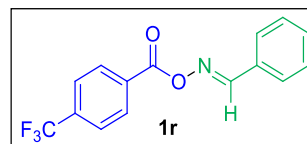

0.000

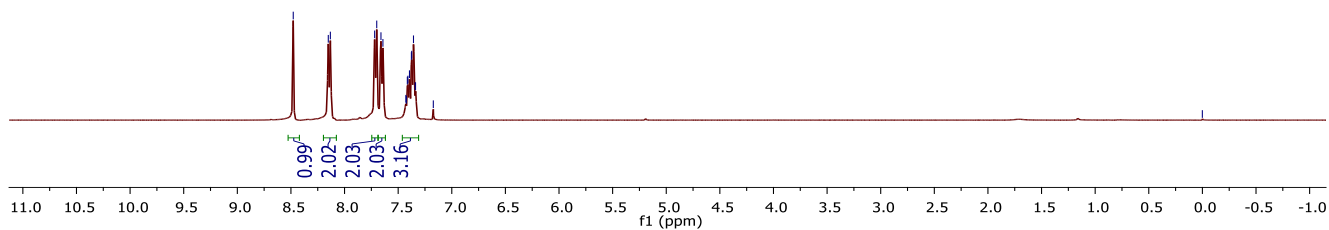

**<sup>13</sup>C{<sup>1</sup>H} NMR of 1r (100 MHz, CDCl<sub>3</sub>)**

Peak list (ppm): 163.05, 157.65, 135.62, 135.29, 134.97, 132.32, 132.26, 130.41, 130.10, 129.28, 128.86, 127.91, 125.95, 125.91, 125.87, 125.84, 125.19, 122.48, 119.77, 117.88, 77.36, 77.04.

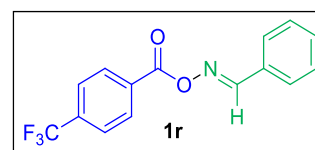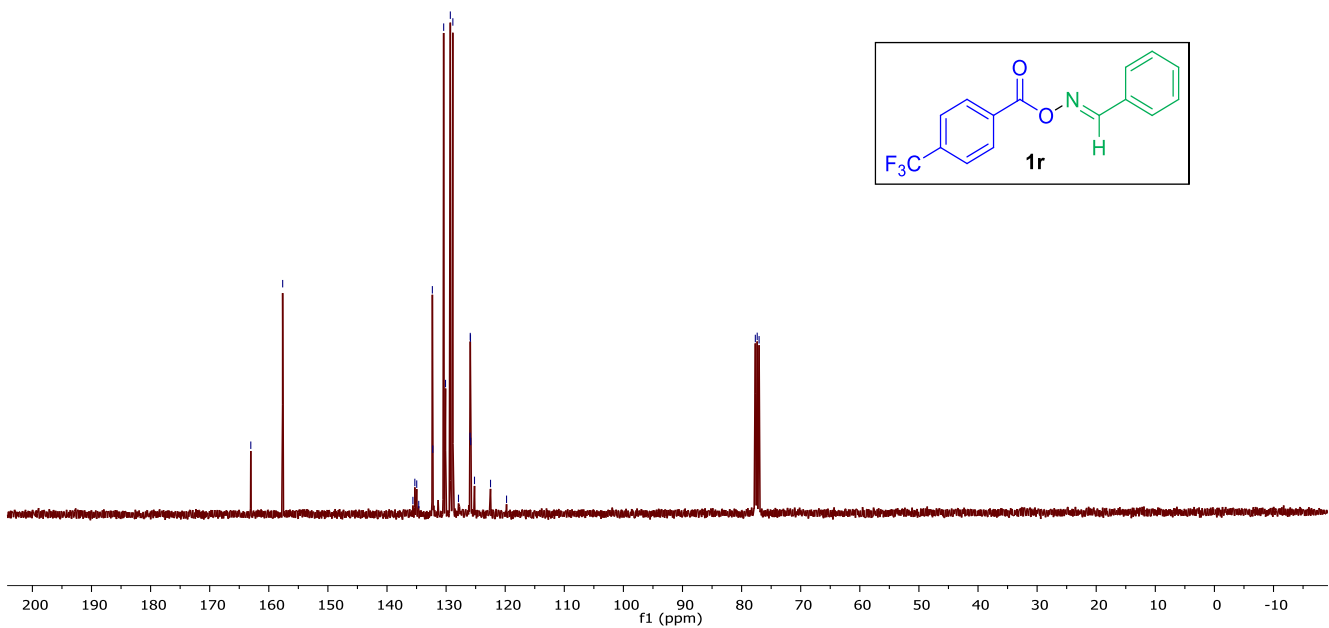

**<sup>1</sup>H NMR of 1s (400 MHz, CDCl<sub>3</sub>)**

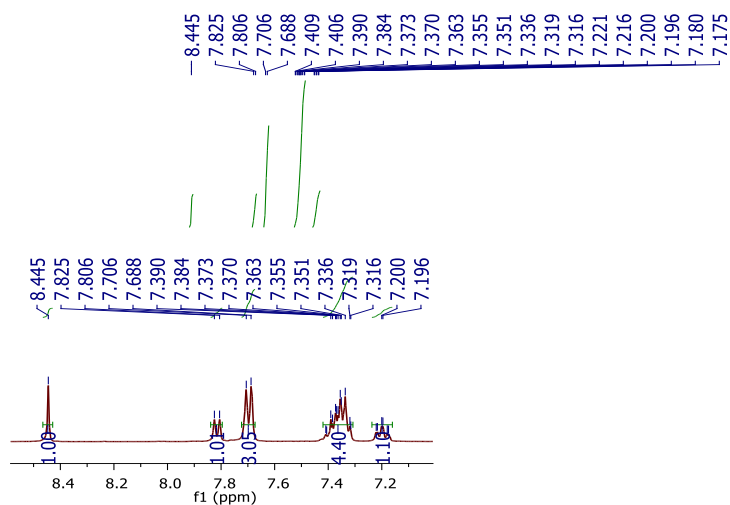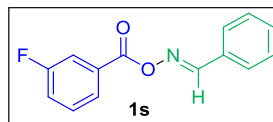

-0.000

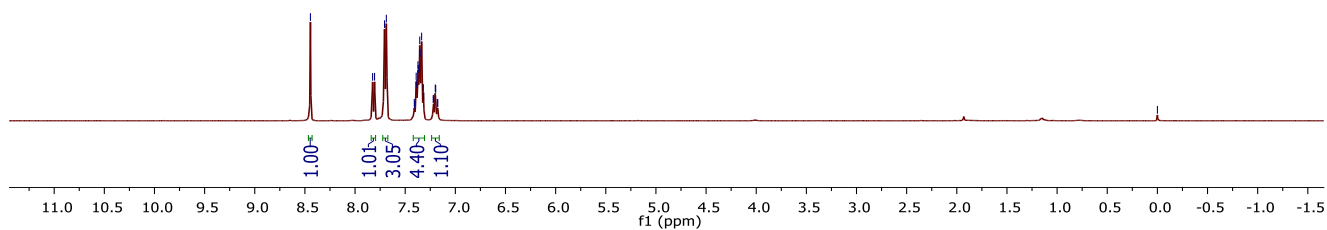

**<sup>13</sup>C{<sup>1</sup>H} NMR of 1s (100 MHz, CDCl<sub>3</sub>)**

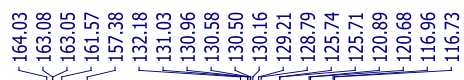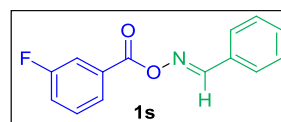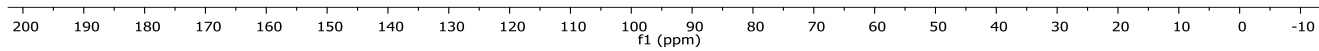

**<sup>1</sup>H NMR of 1t (400 MHz, CDCl<sub>3</sub>)**

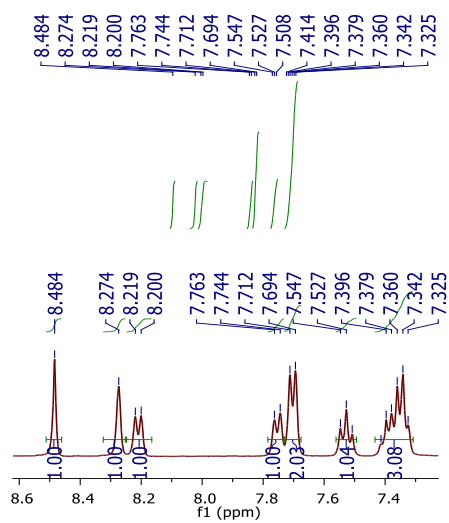

-0.000

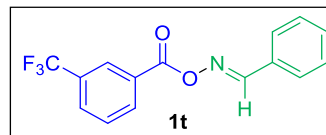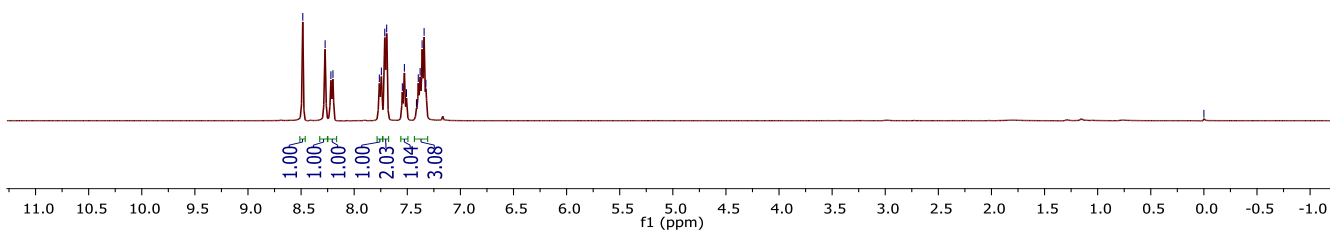

**<sup>13</sup>C{<sup>1</sup>H} NMR of 1t (100 MHz, CDCl<sub>3</sub>)**

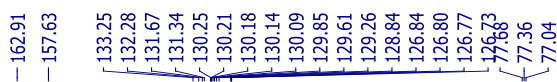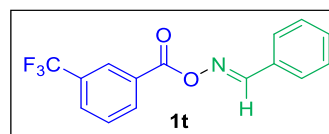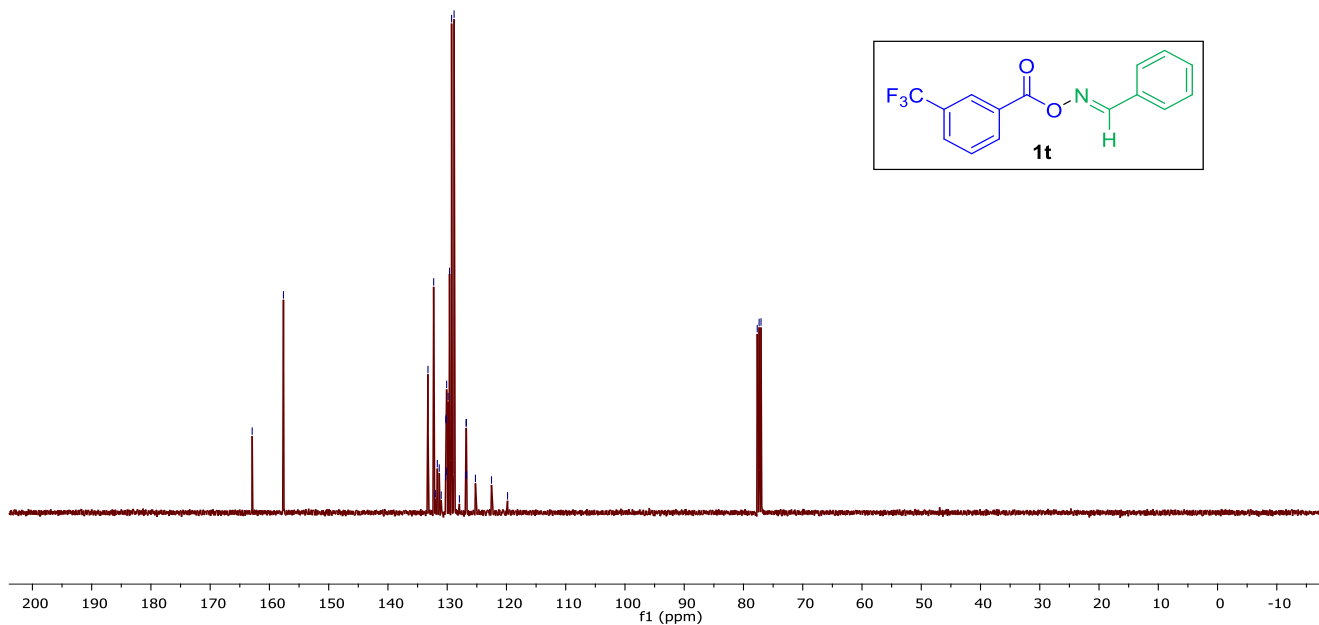

**<sup>1</sup>H NMR of 1u (700 MHz, CDCl<sub>3</sub>)**

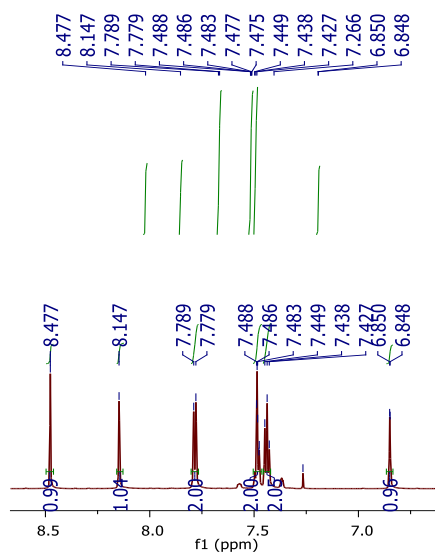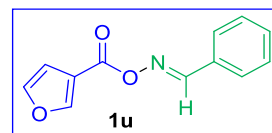

— 0.000

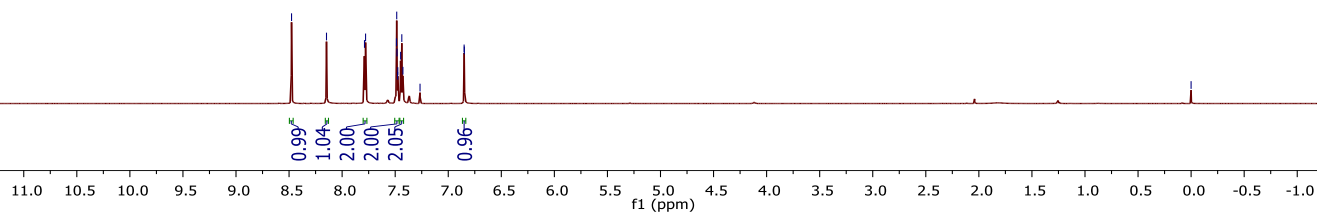

**<sup>13</sup>C{<sup>1</sup>H} NMR of 1u (100 MHz, CDCl<sub>3</sub>)**

— 160.75  
— 156.80  
— 148.44  
— 144.30  
— 132.08  
— 130.36  
— 129.22  
— 128.78  
— 117.66  
— 110.12

— 77.68  
— 77.36  
— 77.04

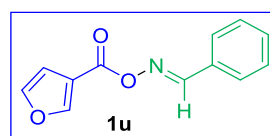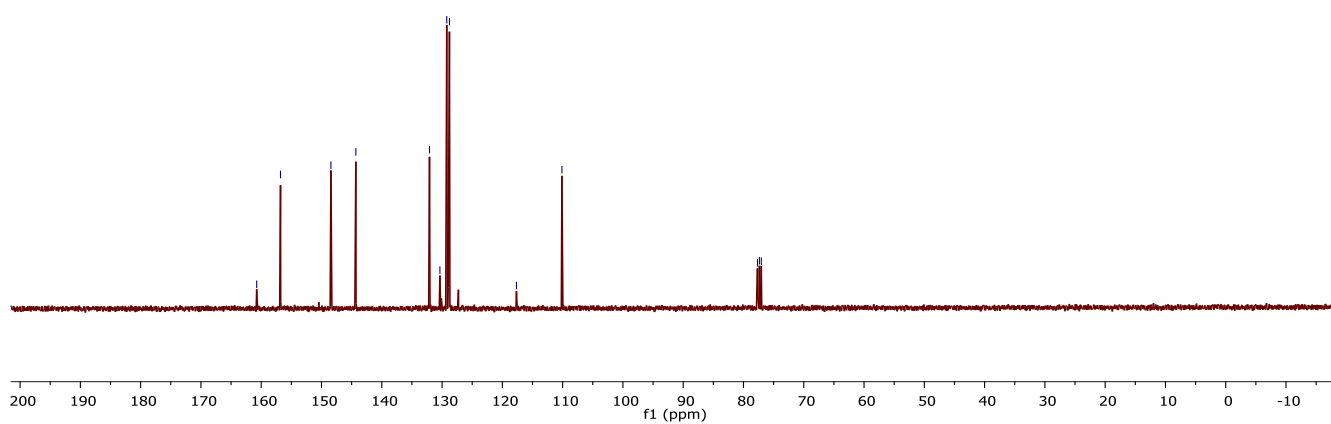

**<sup>1</sup>H NMR of 1v (700 MHz, CDCl<sub>3</sub>)**

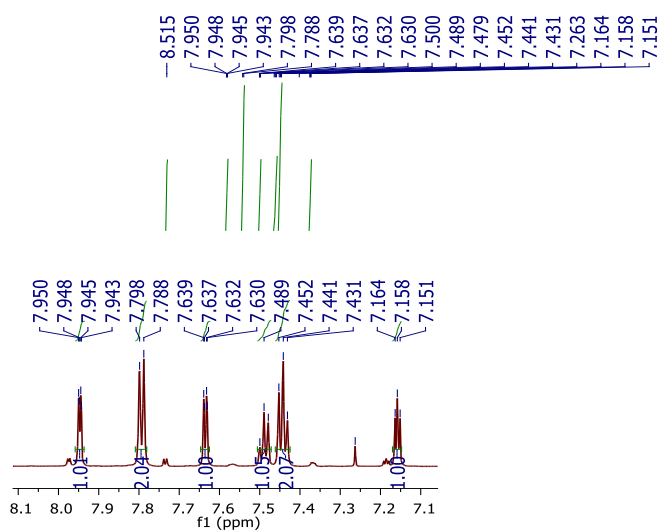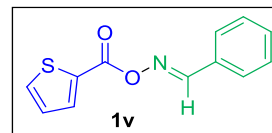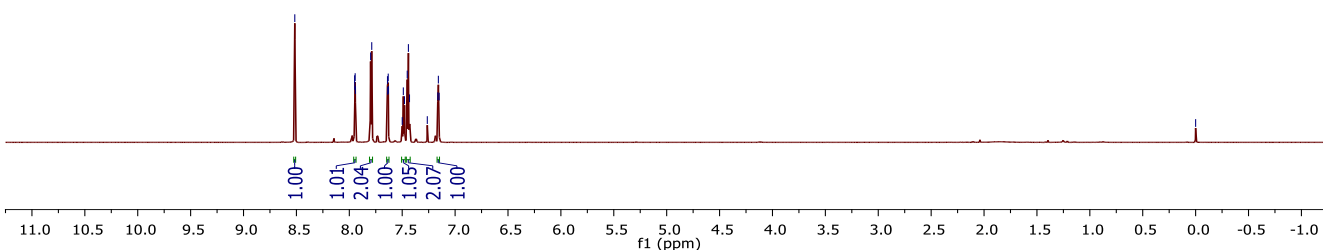

**<sup>13</sup>C{<sup>1</sup>H} NMR of 1v (176 MHz, CDCl<sub>3</sub>)**

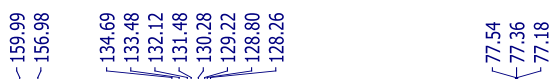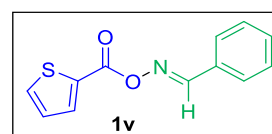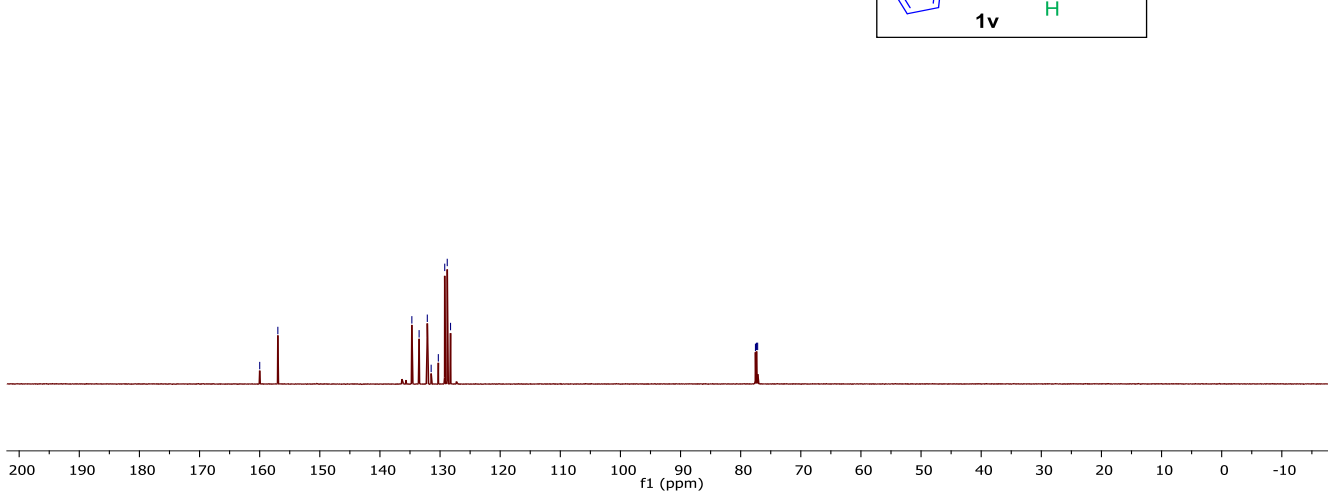

**<sup>1</sup>H NMR of 4a (400 MHz, CDCl<sub>3</sub>)**

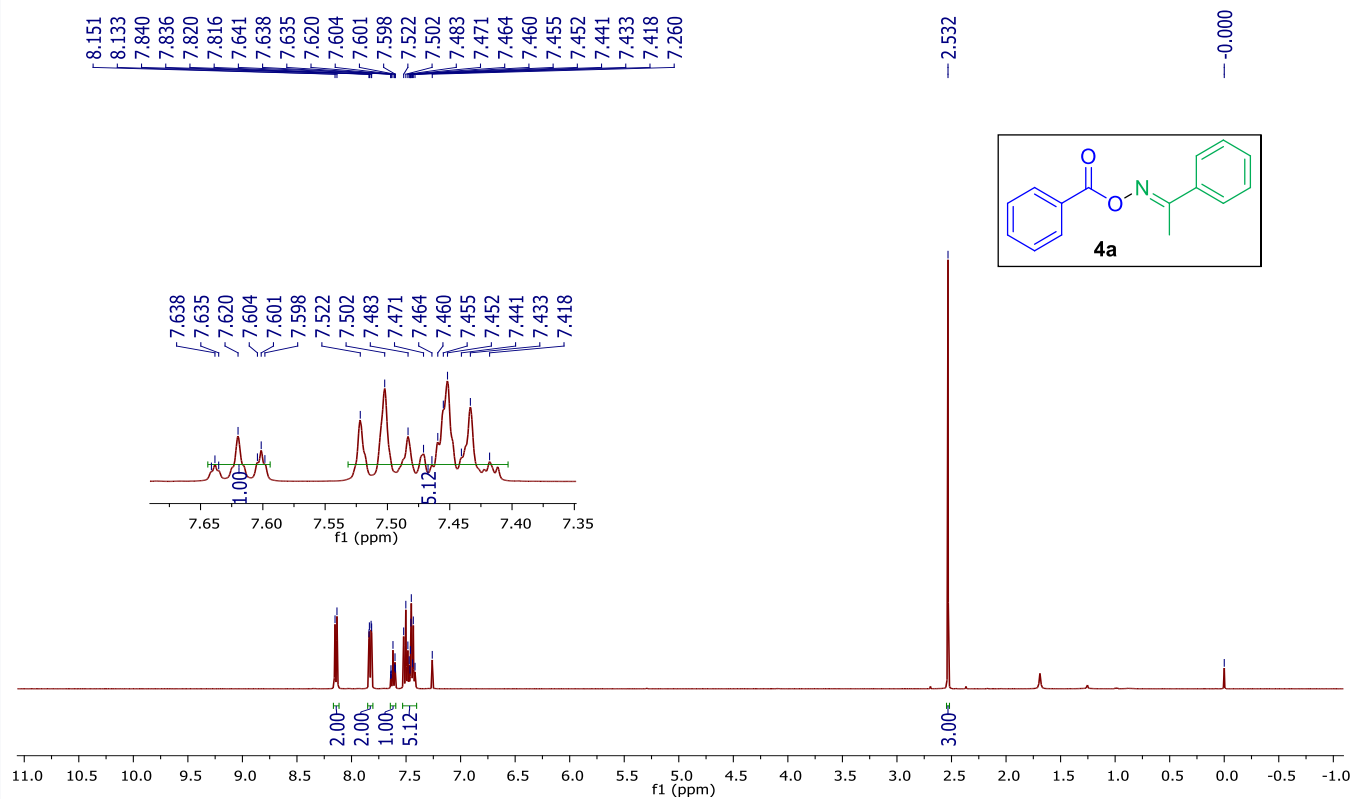

**<sup>13</sup>C{<sup>1</sup>H} NMR of 4a (100 MHz, CDCl<sub>3</sub>)**

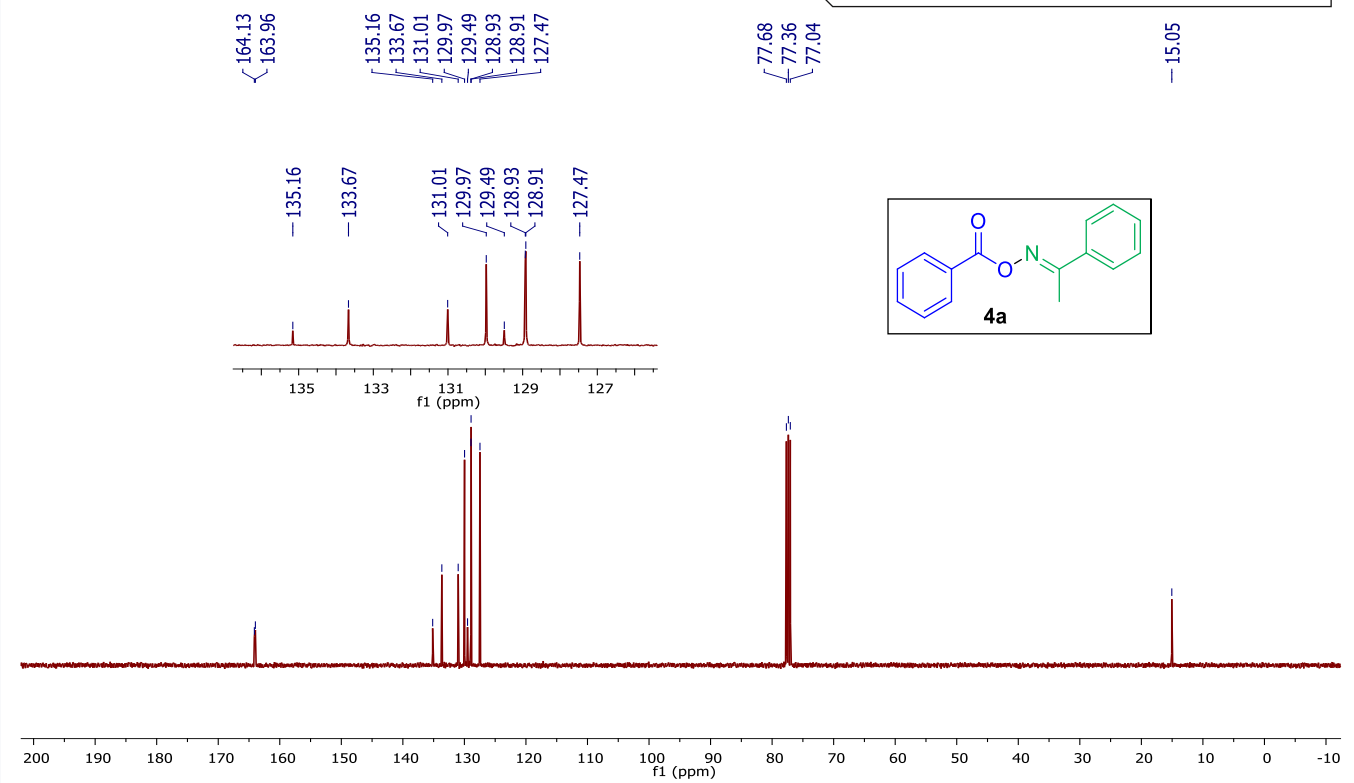

**<sup>1</sup>H NMR of 4b (400 MHz, CDCl<sub>3</sub>)**

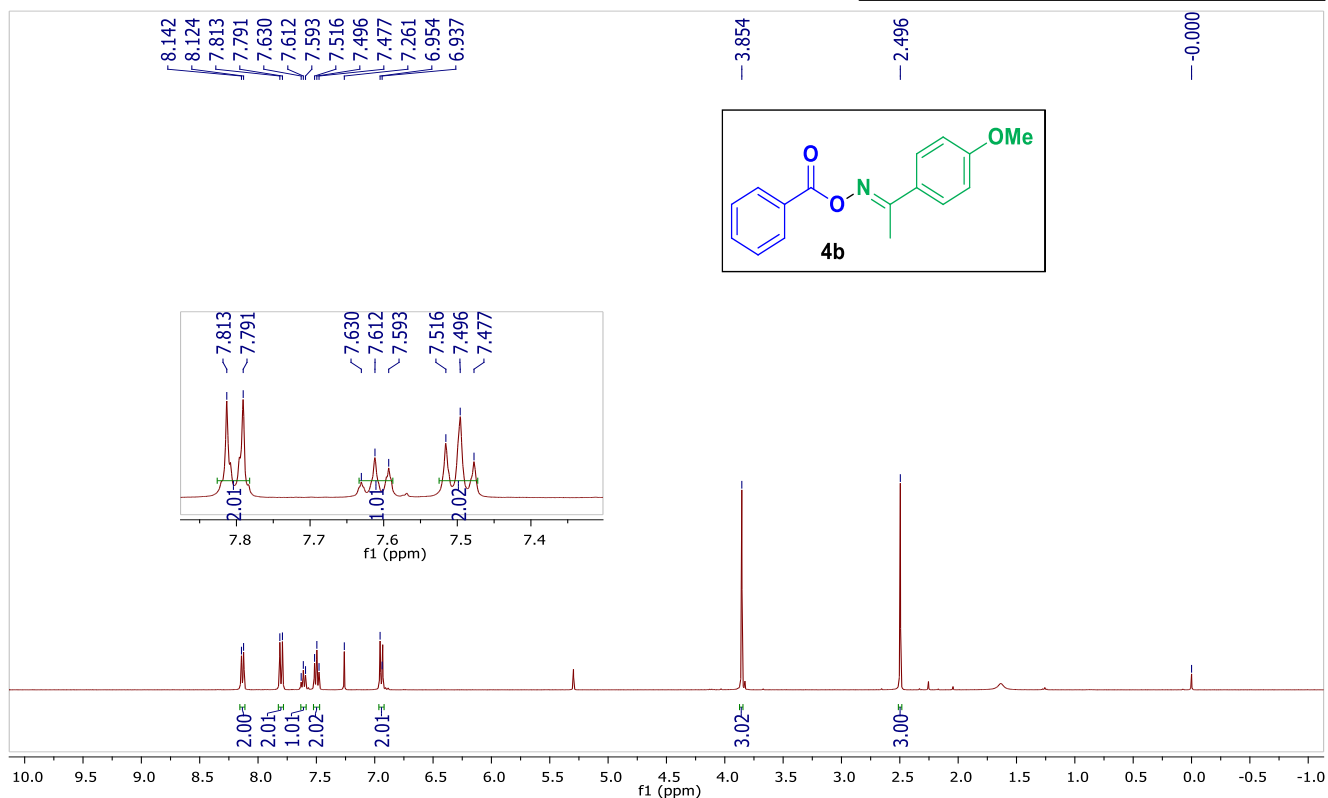

**<sup>13</sup>C{<sup>1</sup>H} NMR of 4b (176 MHz, CDCl<sub>3</sub>)**

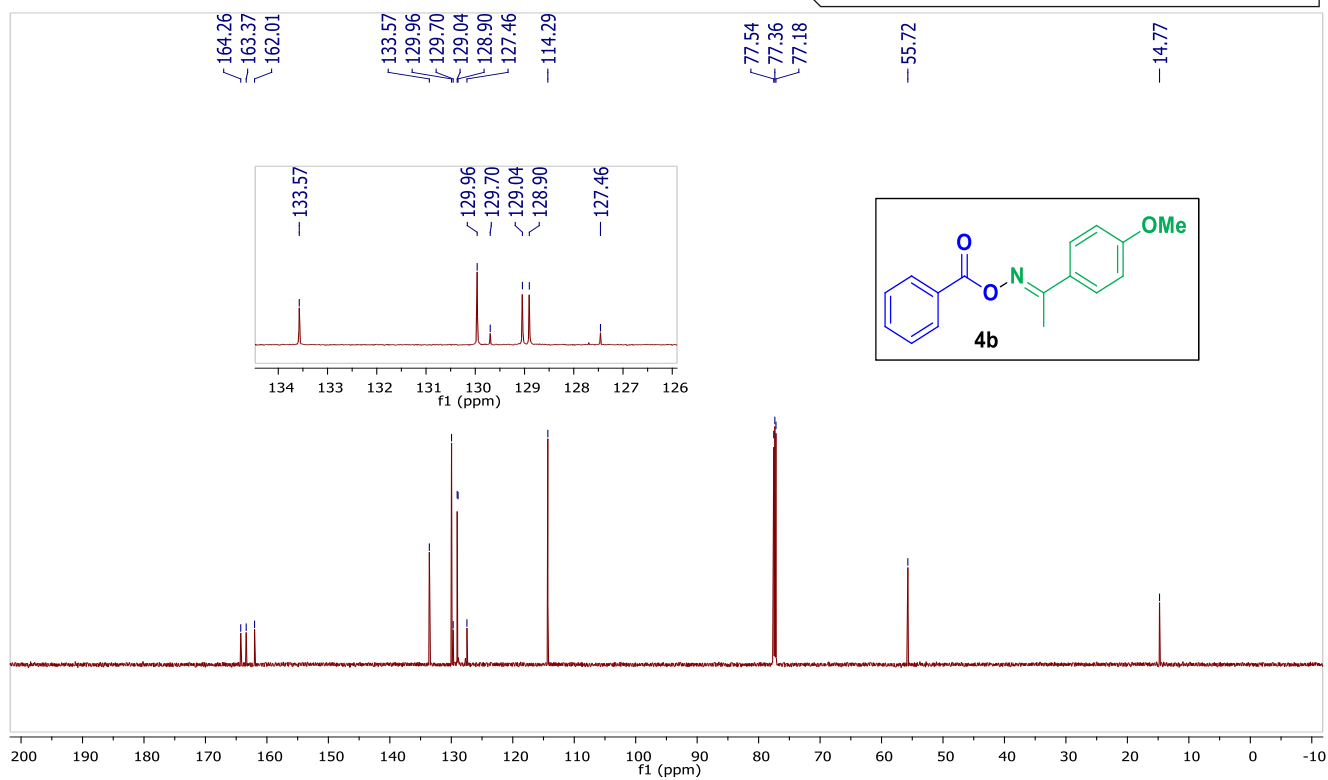

**<sup>1</sup>H NMR of 4c (400 MHz, CDCl<sub>3</sub>)**

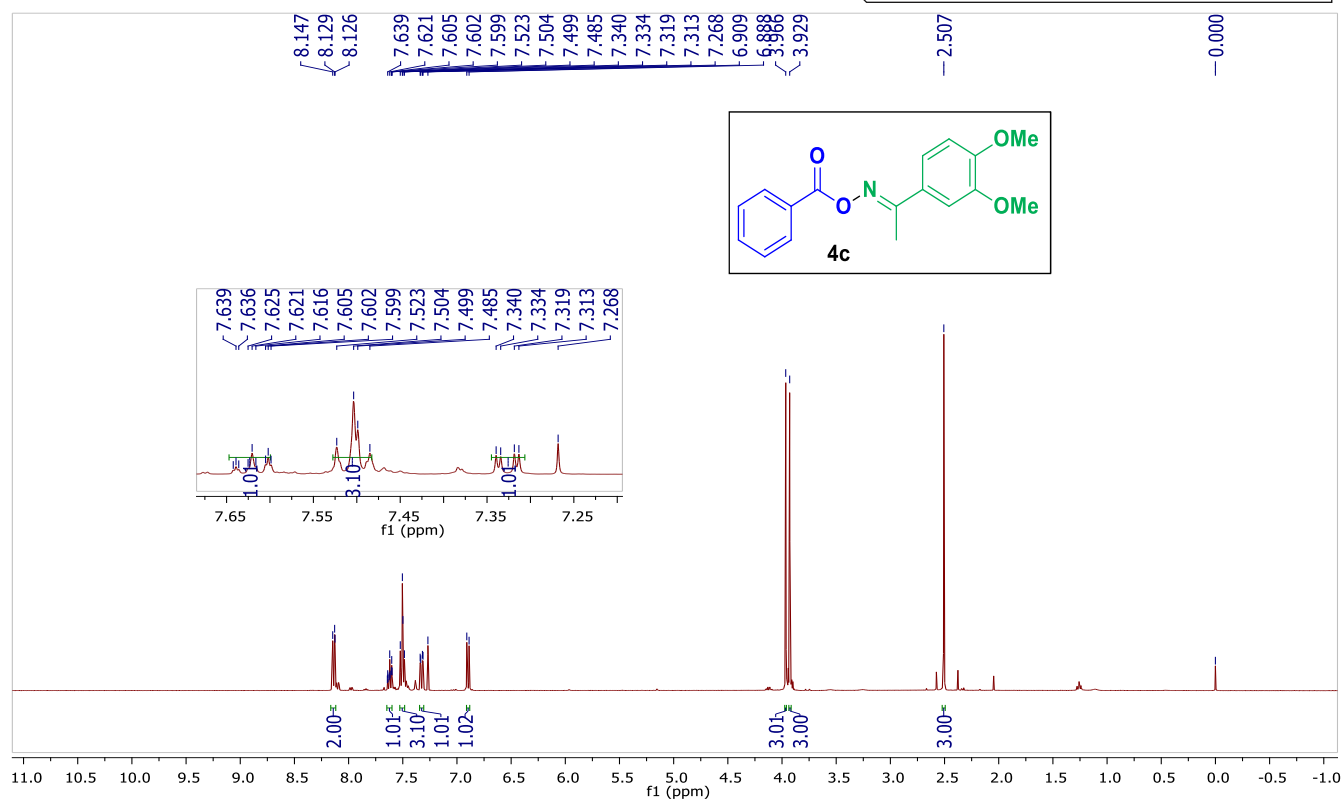

**<sup>13</sup>C{<sup>1</sup>H} NMR of 4c (100 MHz, CDCl<sub>3</sub>)**

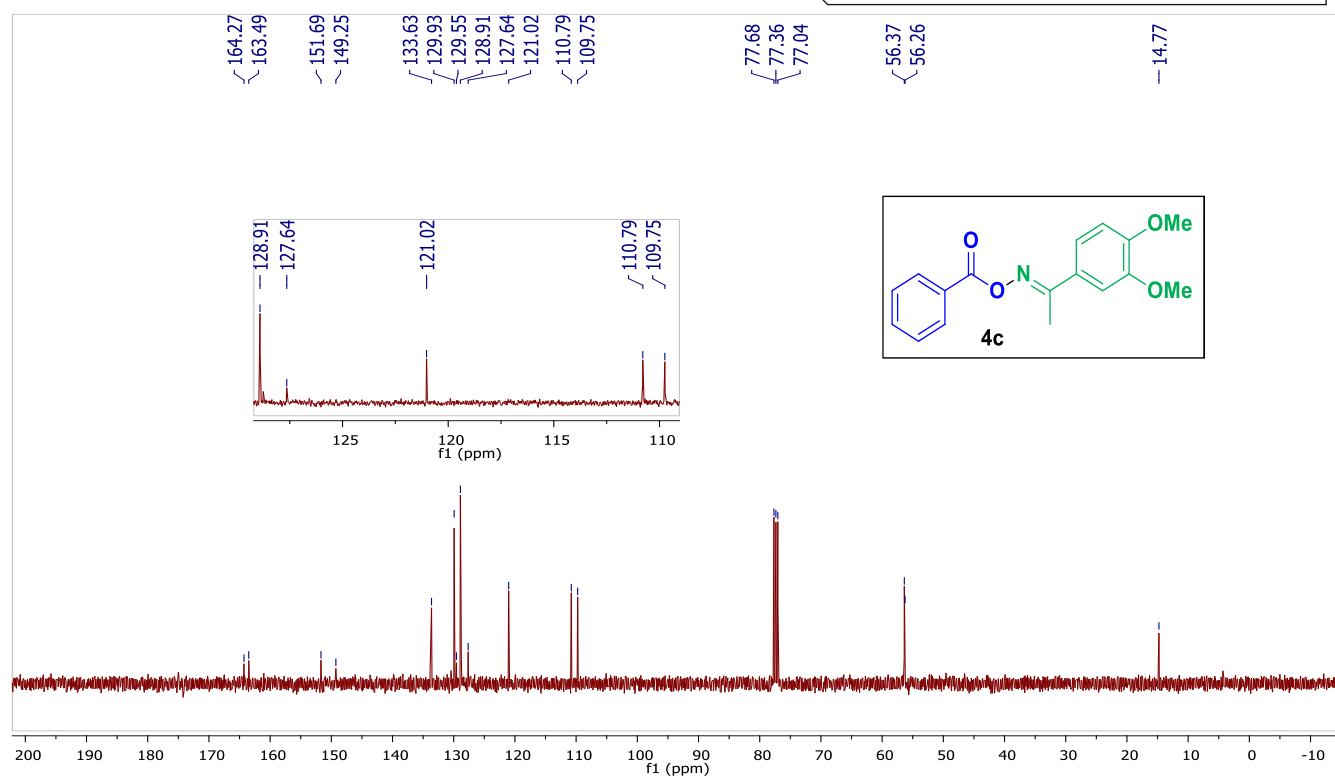

**<sup>1</sup>H NMR of 4d (400 MHz, CDCl<sub>3</sub>)**

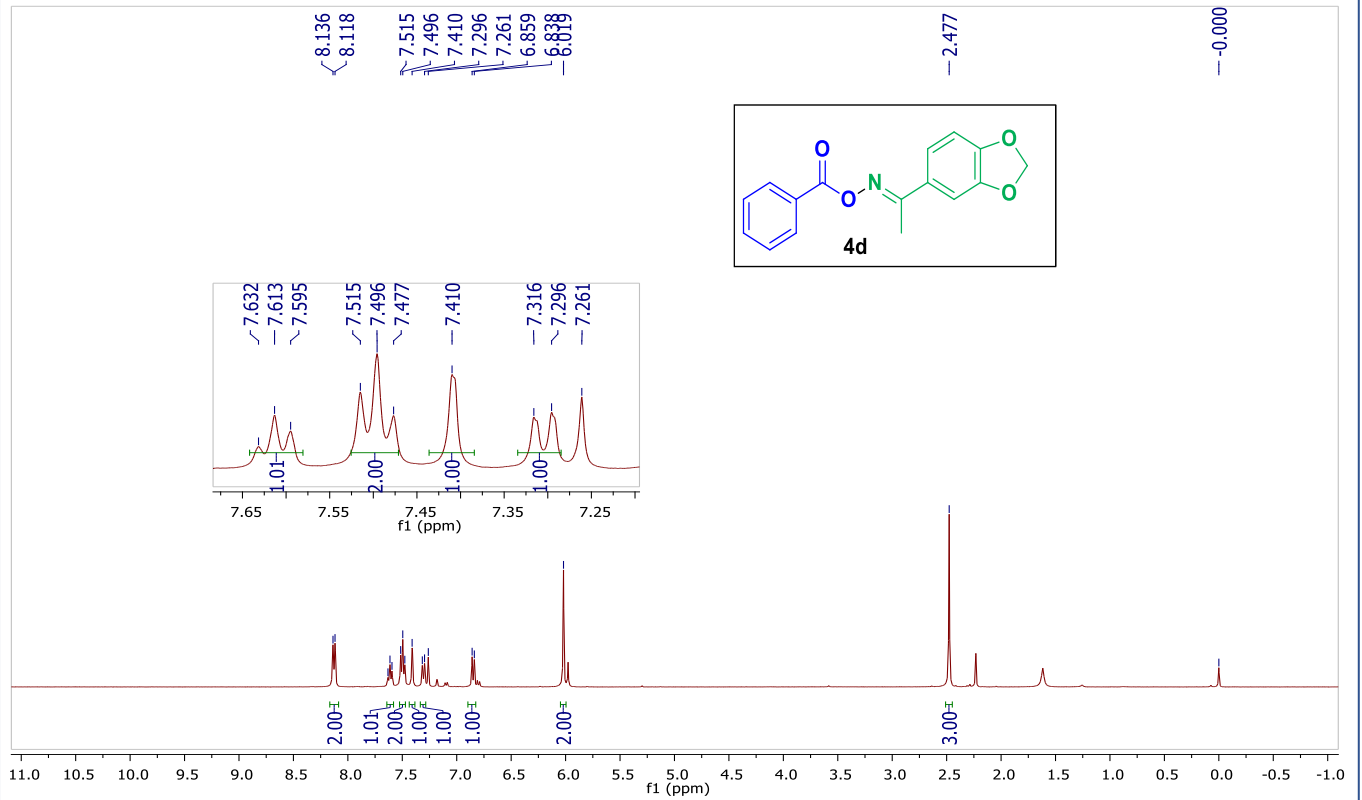

**<sup>13</sup>C{<sup>1</sup>H} NMR of 4d (176 MHz, CDCl<sub>3</sub>)**

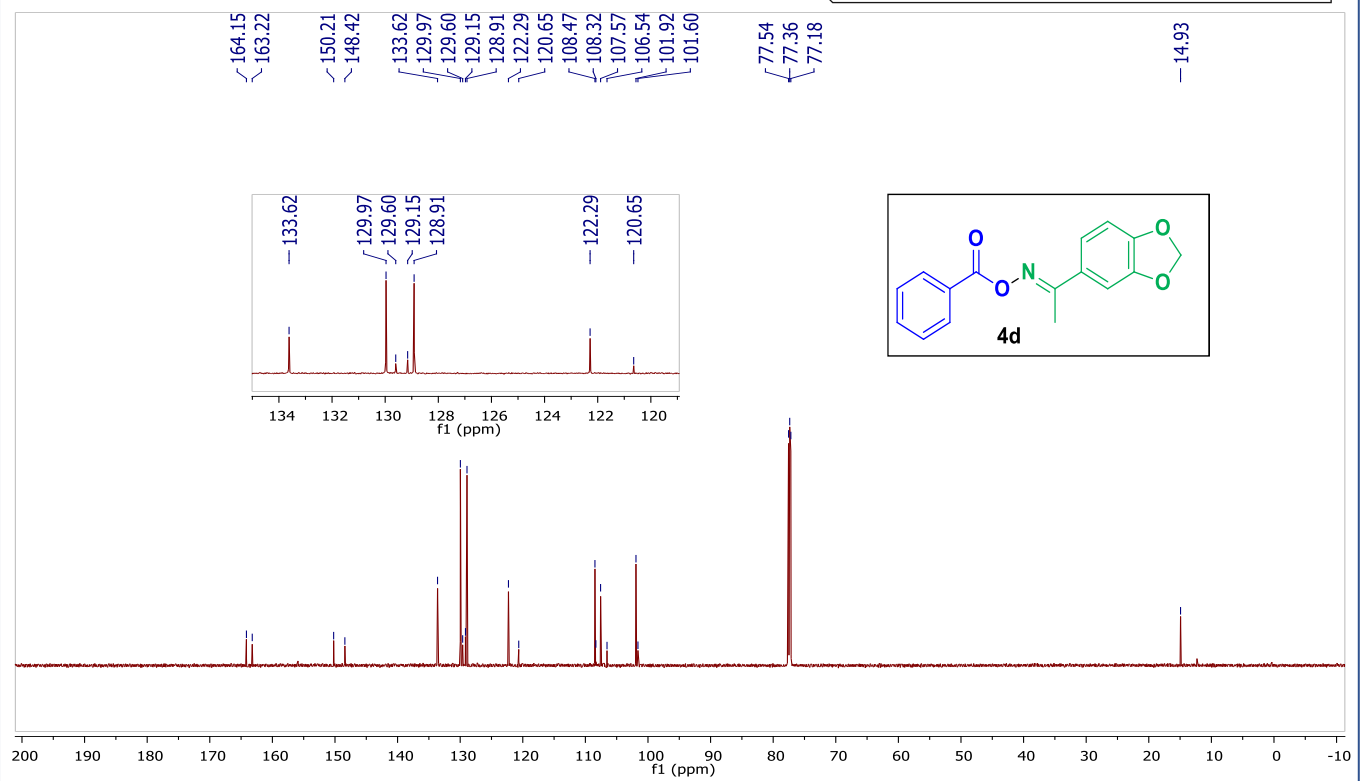

<sup>1</sup>H NMR of 4e (400 MHz, CDCl<sub>3</sub>)

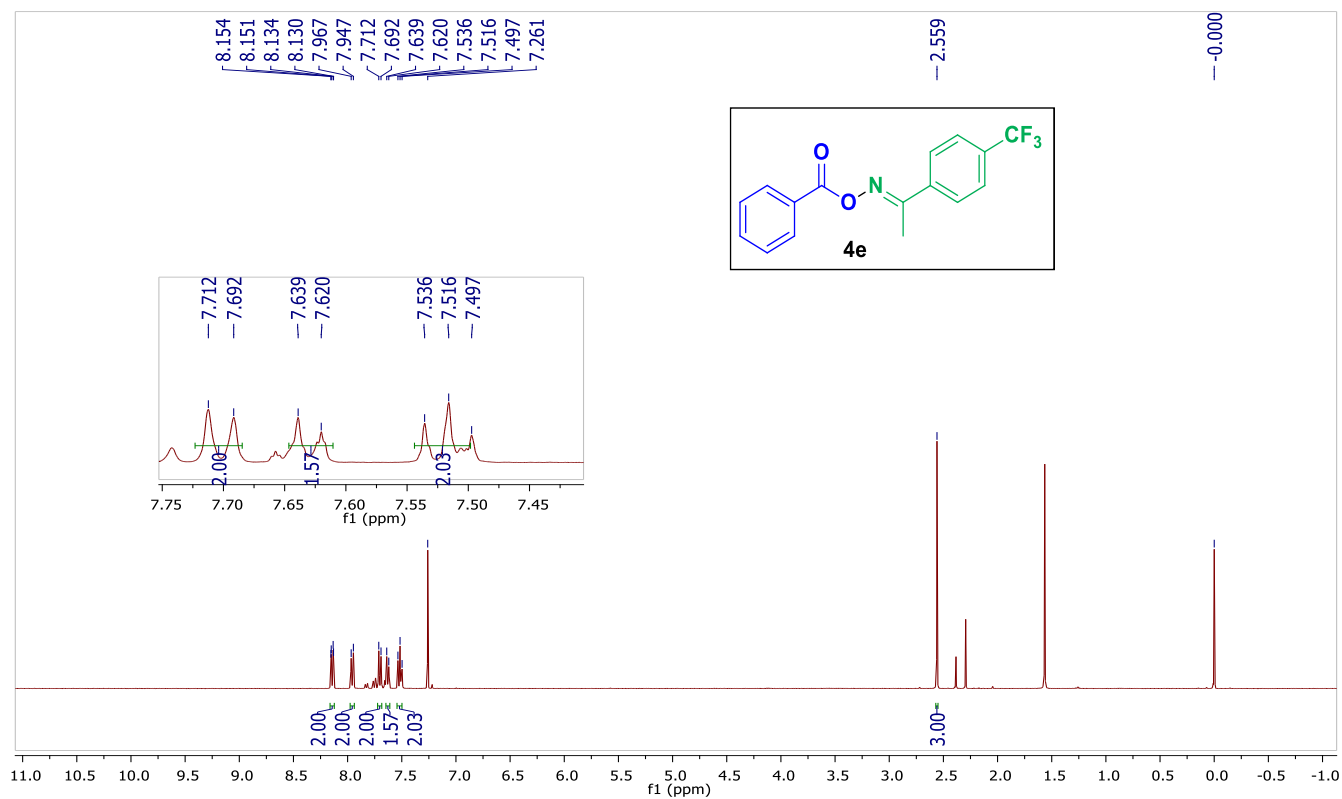

<sup>13</sup>C{<sup>1</sup>H} NMR of 4e (176 MHz, CDCl<sub>3</sub>)

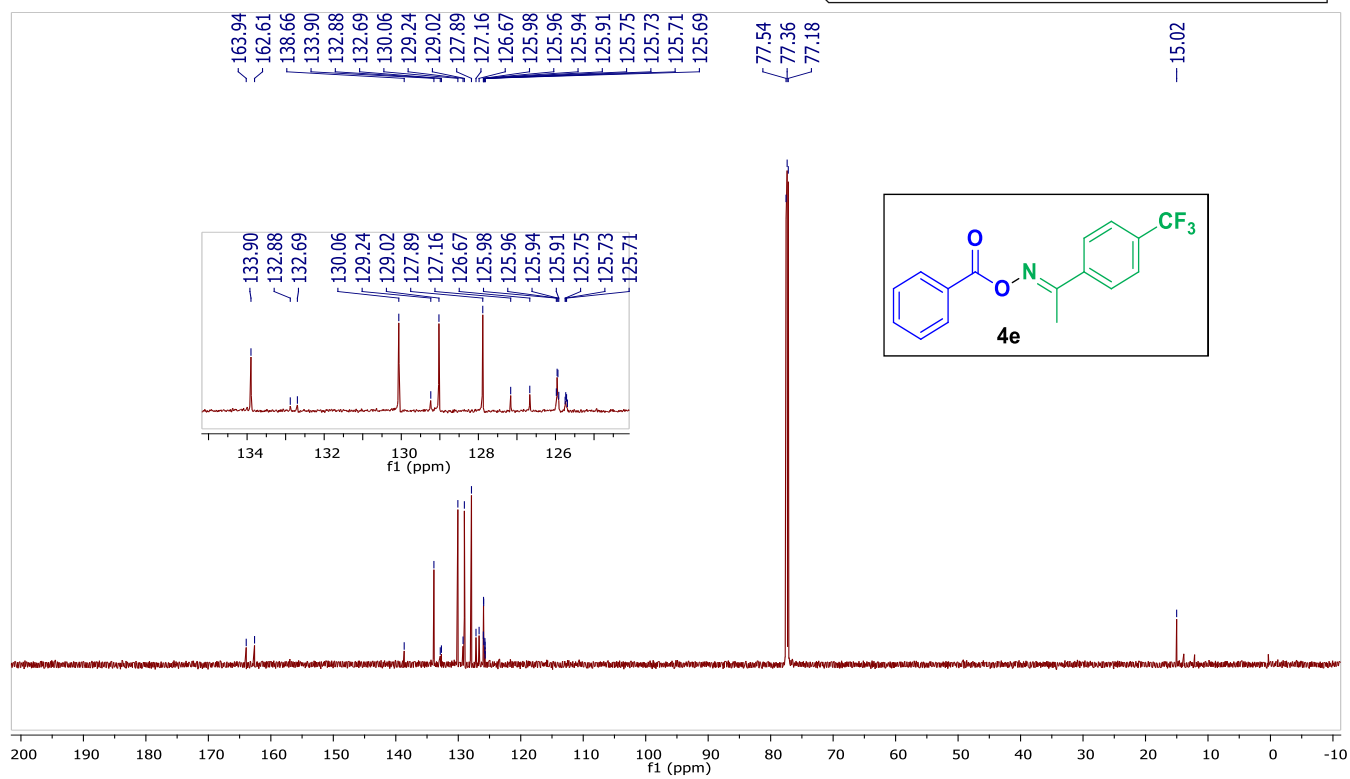

**<sup>1</sup>H NMR of 4f (400 MHz, CDCl<sub>3</sub>)**

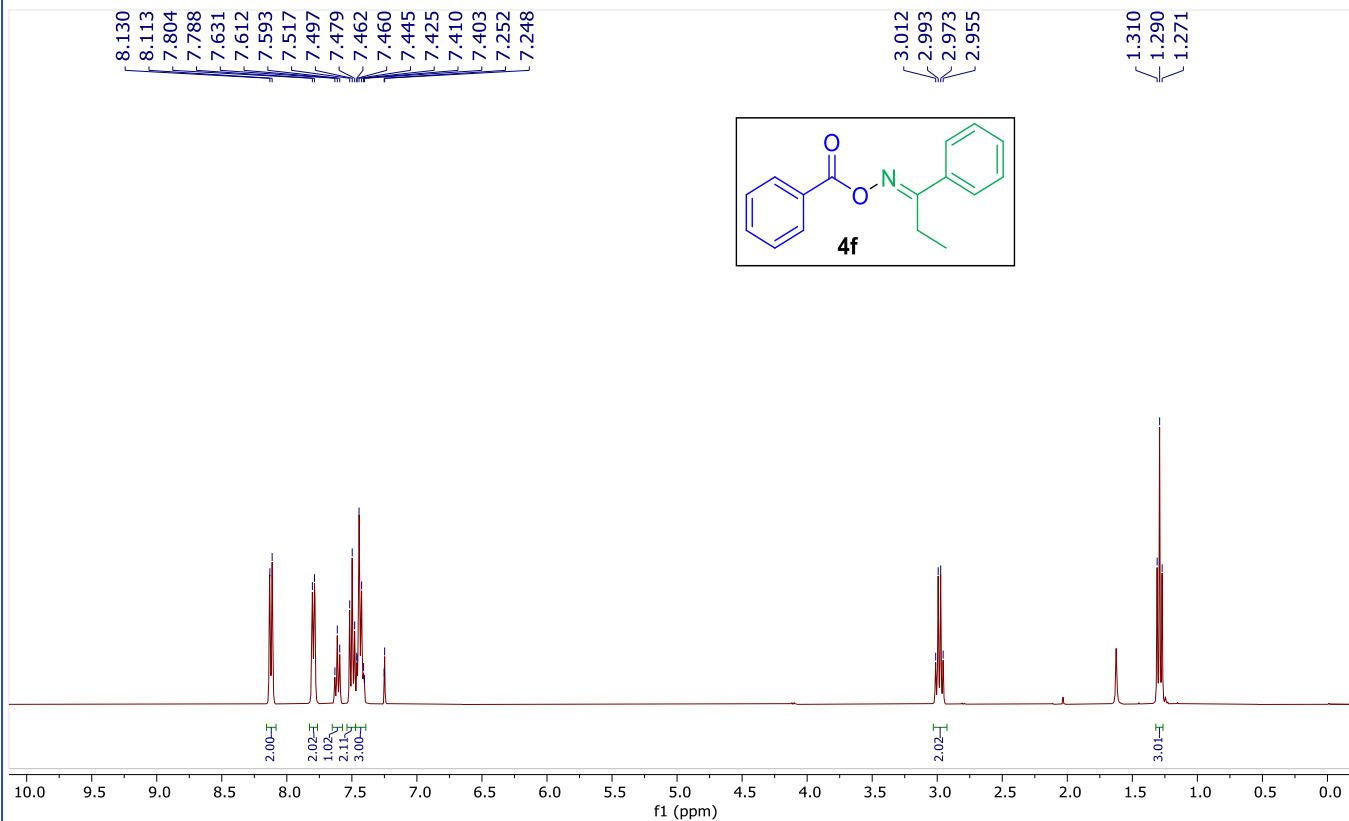

**<sup>13</sup>C{<sup>1</sup>H} NMR of 4f (100 MHz, CDCl<sub>3</sub>)**

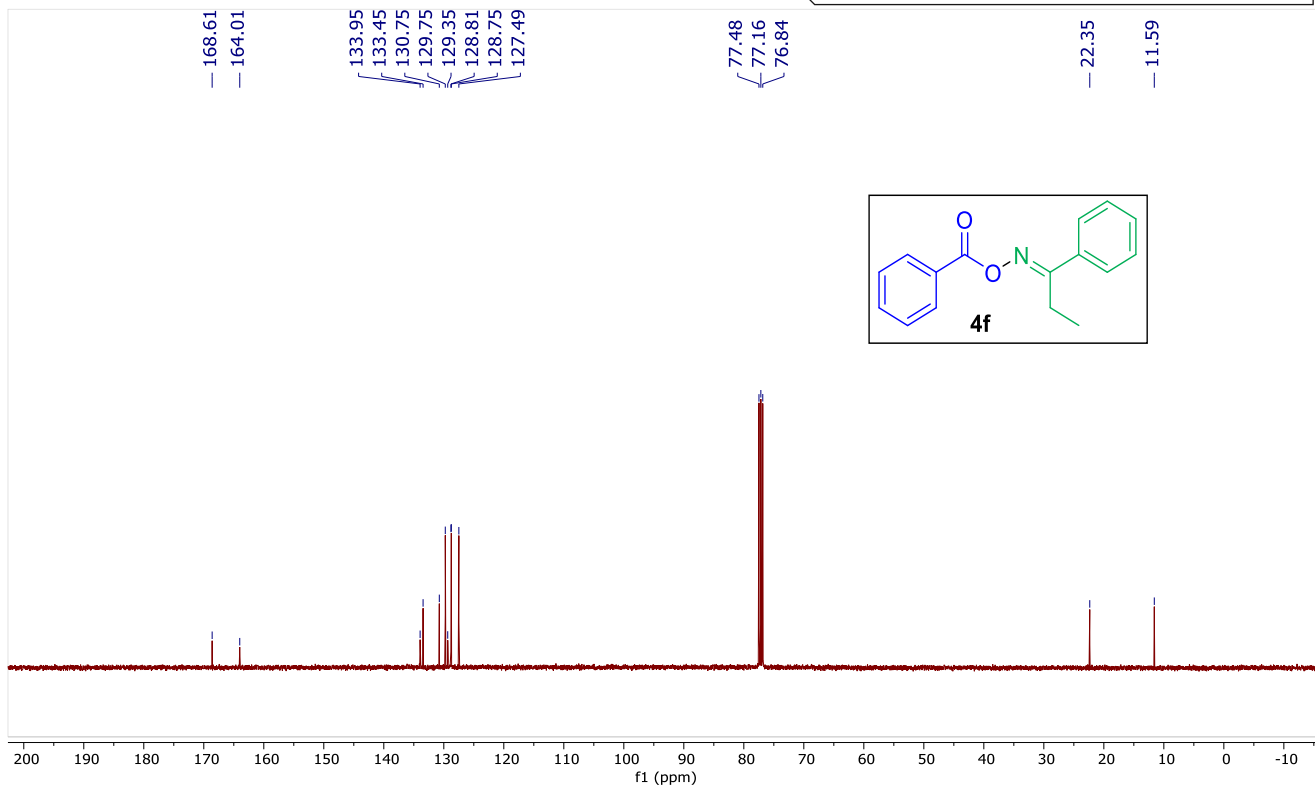

**<sup>1</sup>H NMR of 4g (400 MHz, CDCl<sub>3</sub>)**

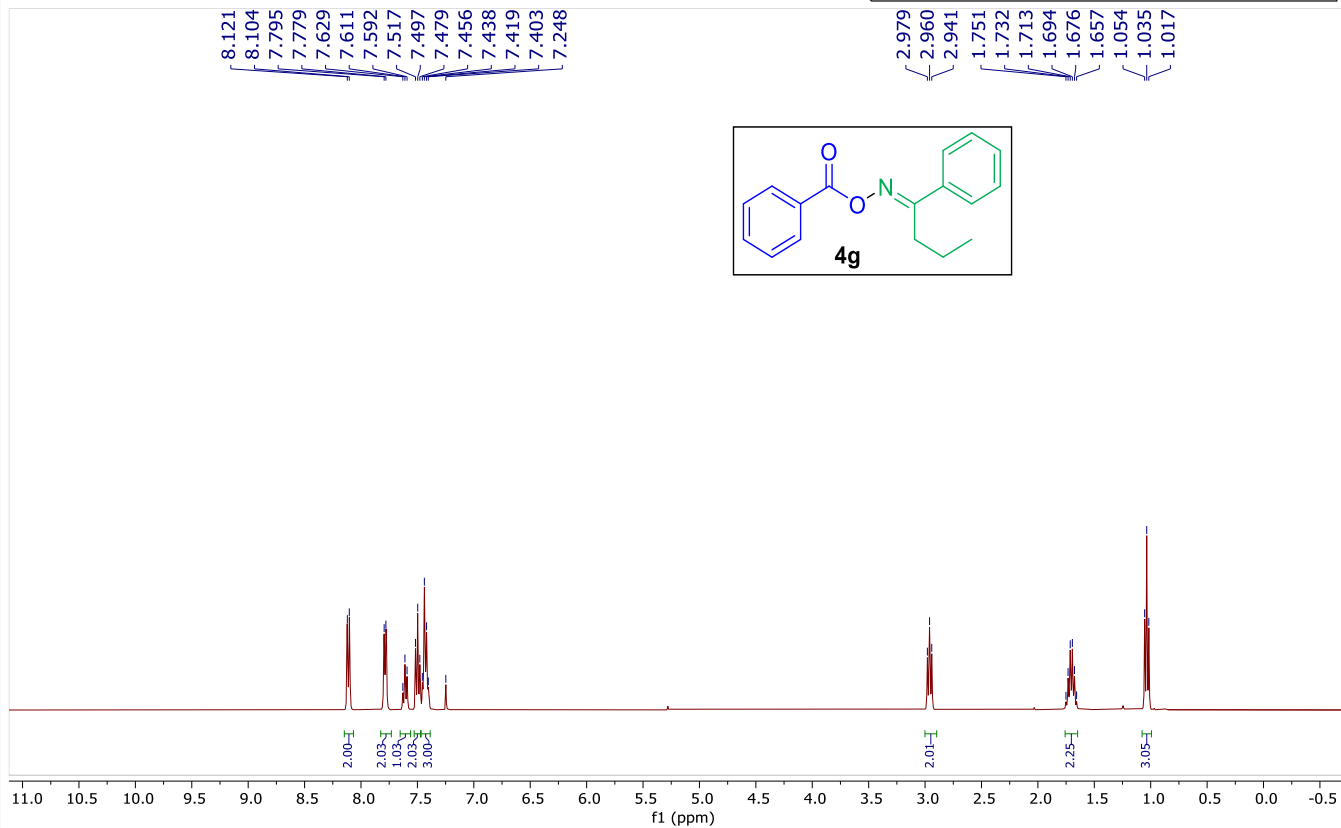

**<sup>13</sup>C{<sup>1</sup>H} NMR of 4g (100 MHz, CDCl<sub>3</sub>)**

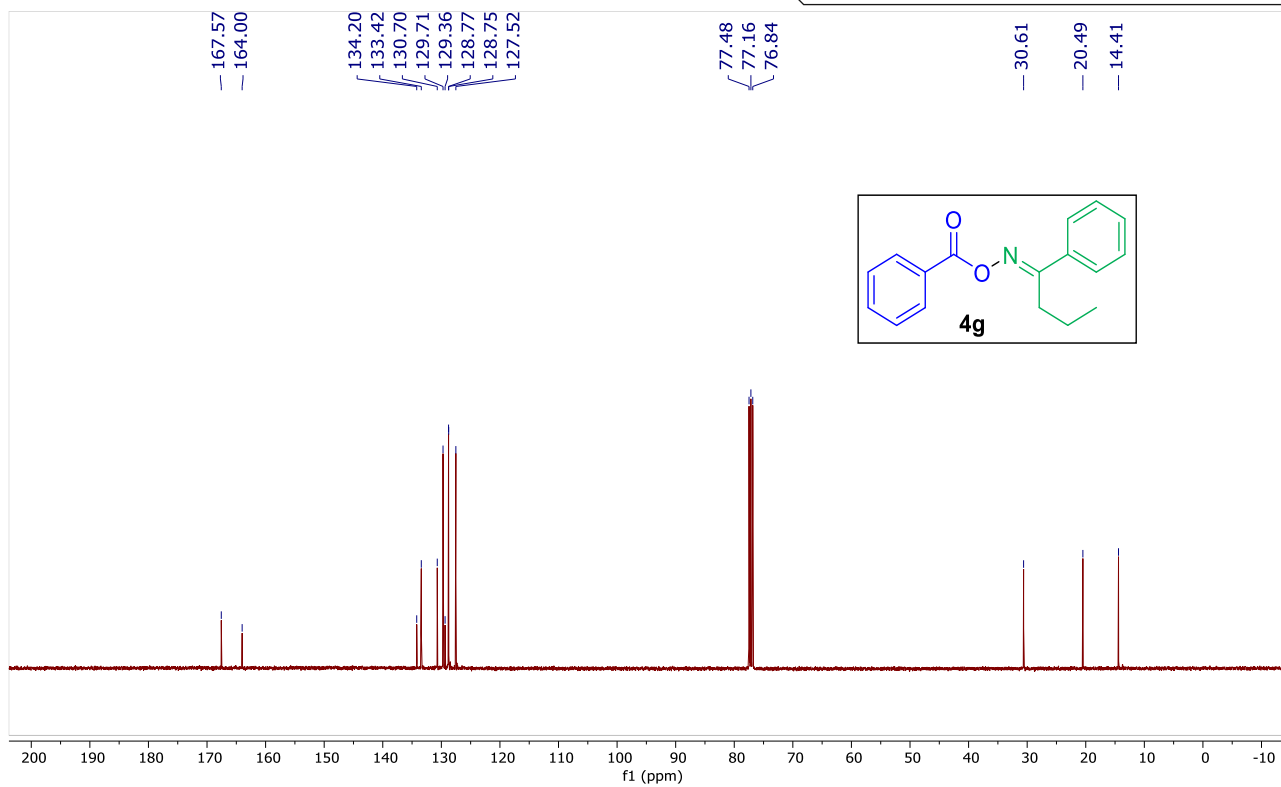

<sup>1</sup>H NMR of 4h (400 MHz, CDCl<sub>3</sub>)

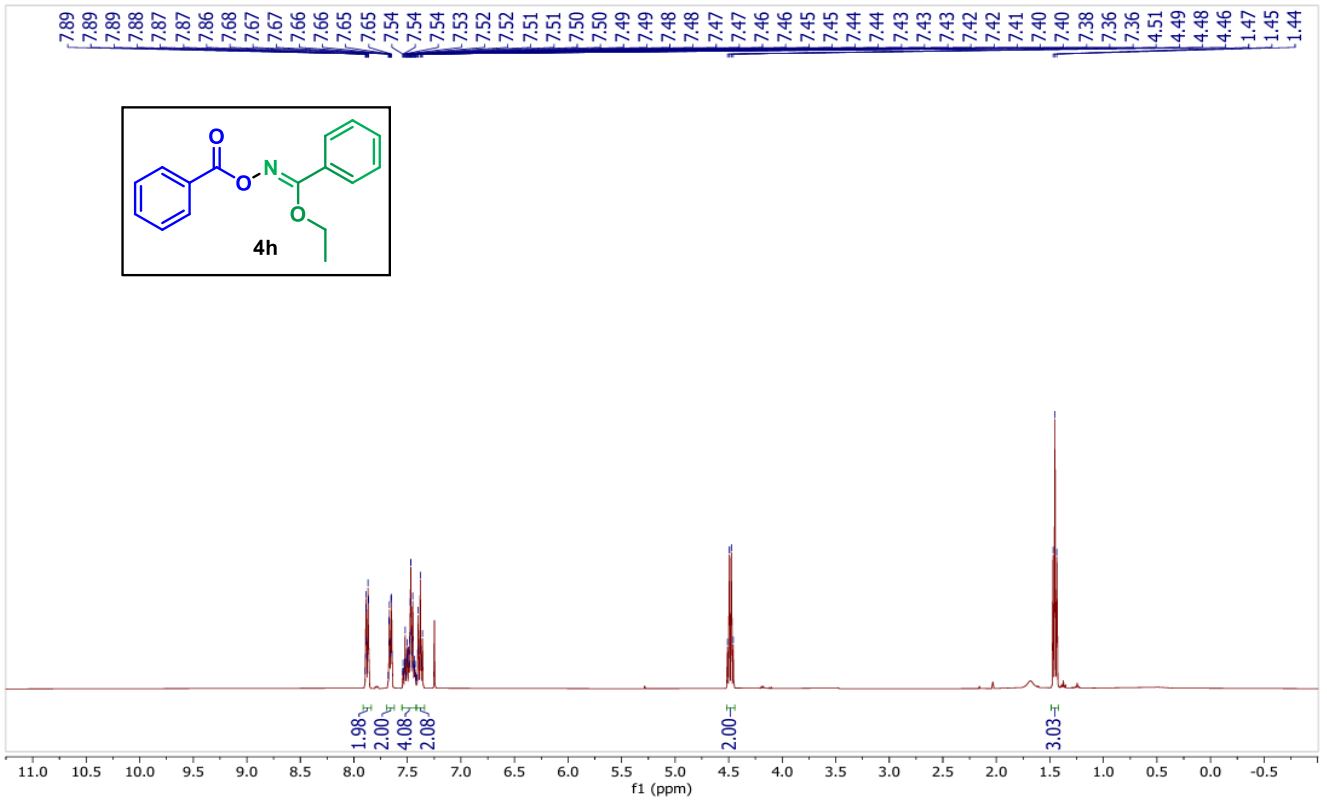

<sup>13</sup>C{<sup>1</sup>H} NMR of 4h (100 MHz, CDCl<sub>3</sub>)

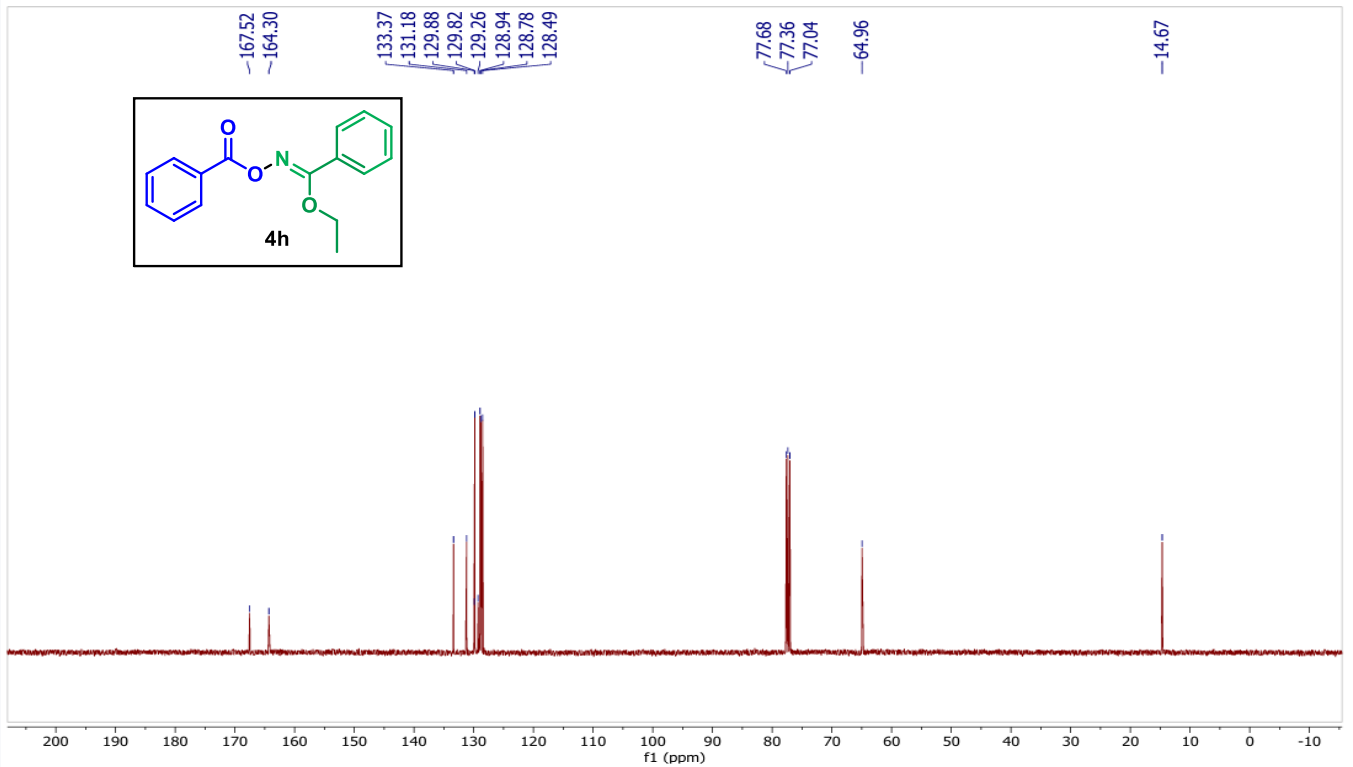

<sup>1</sup>H NMR of 4i (400 MHz, CDCl<sub>3</sub>)

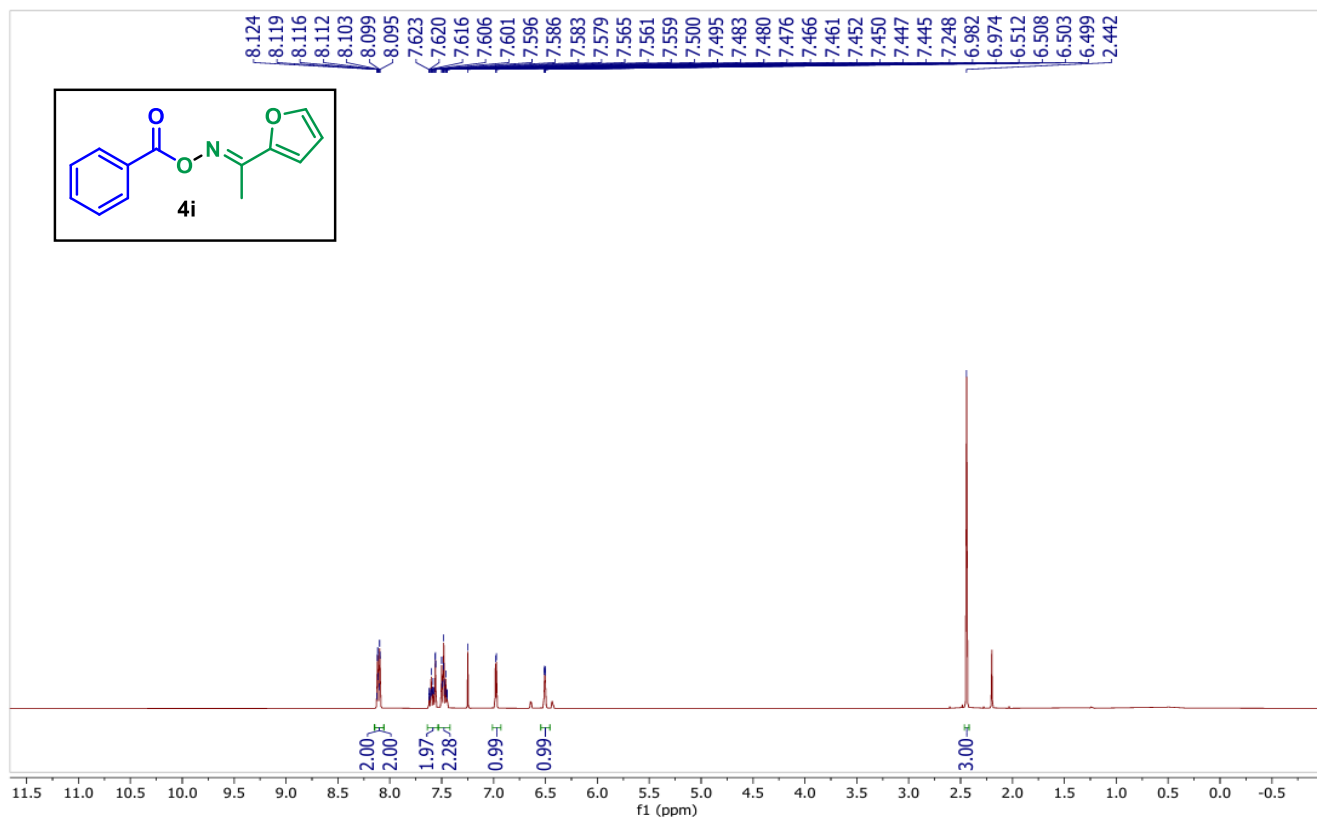

<sup>13</sup>C{<sup>1</sup>H} NMR of 4i (100 MHz, CDCl<sub>3</sub>)

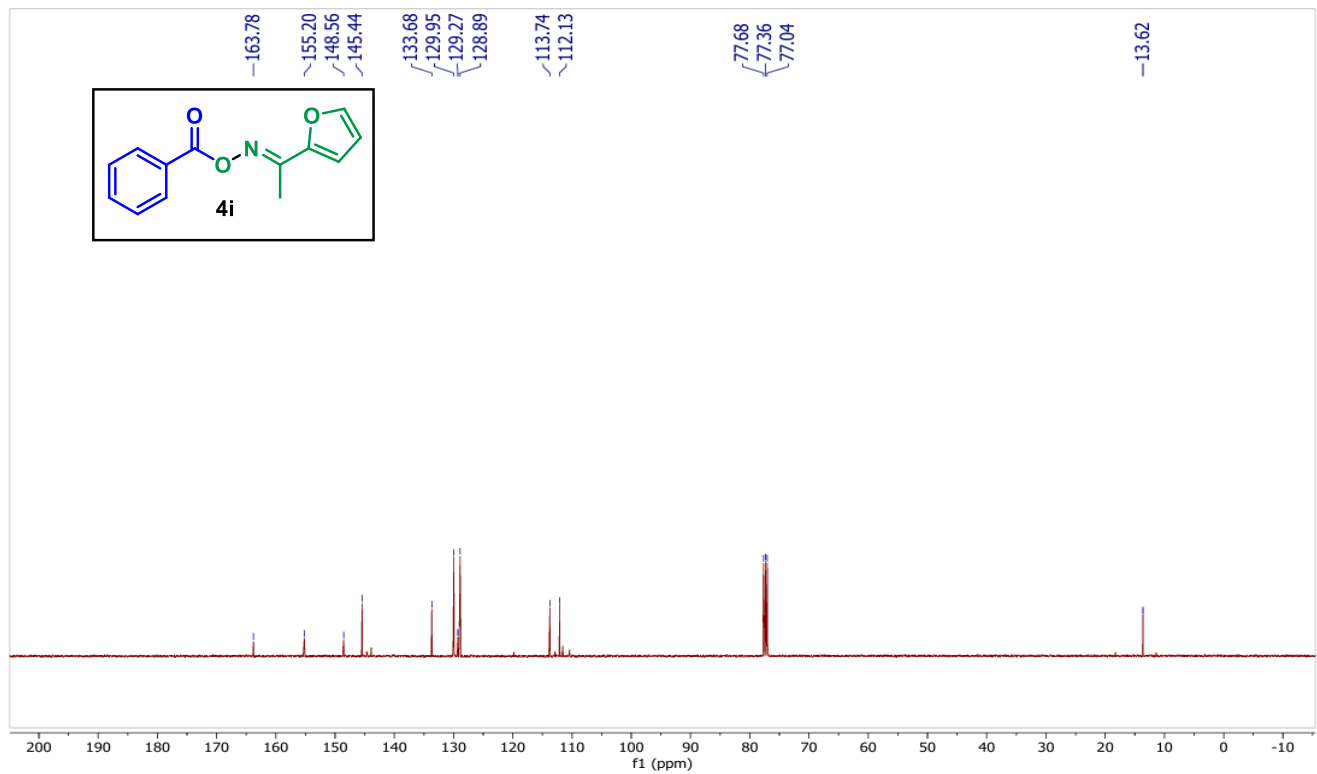

<sup>1</sup>H NMR of 4j (400 MHz, CDCl<sub>3</sub>)

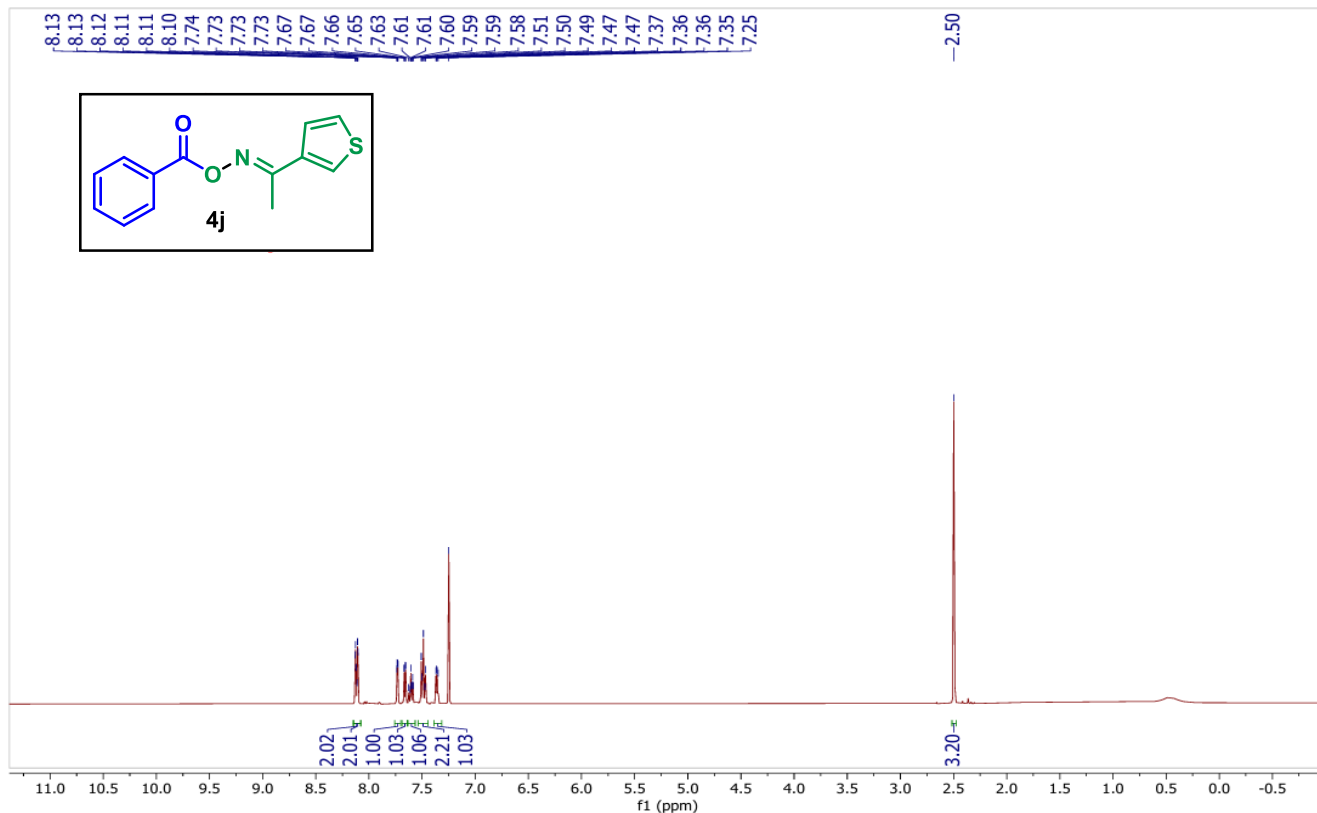

<sup>13</sup>C{<sup>1</sup>H} NMR of 4j (100 MHz, CDCl<sub>3</sub>)

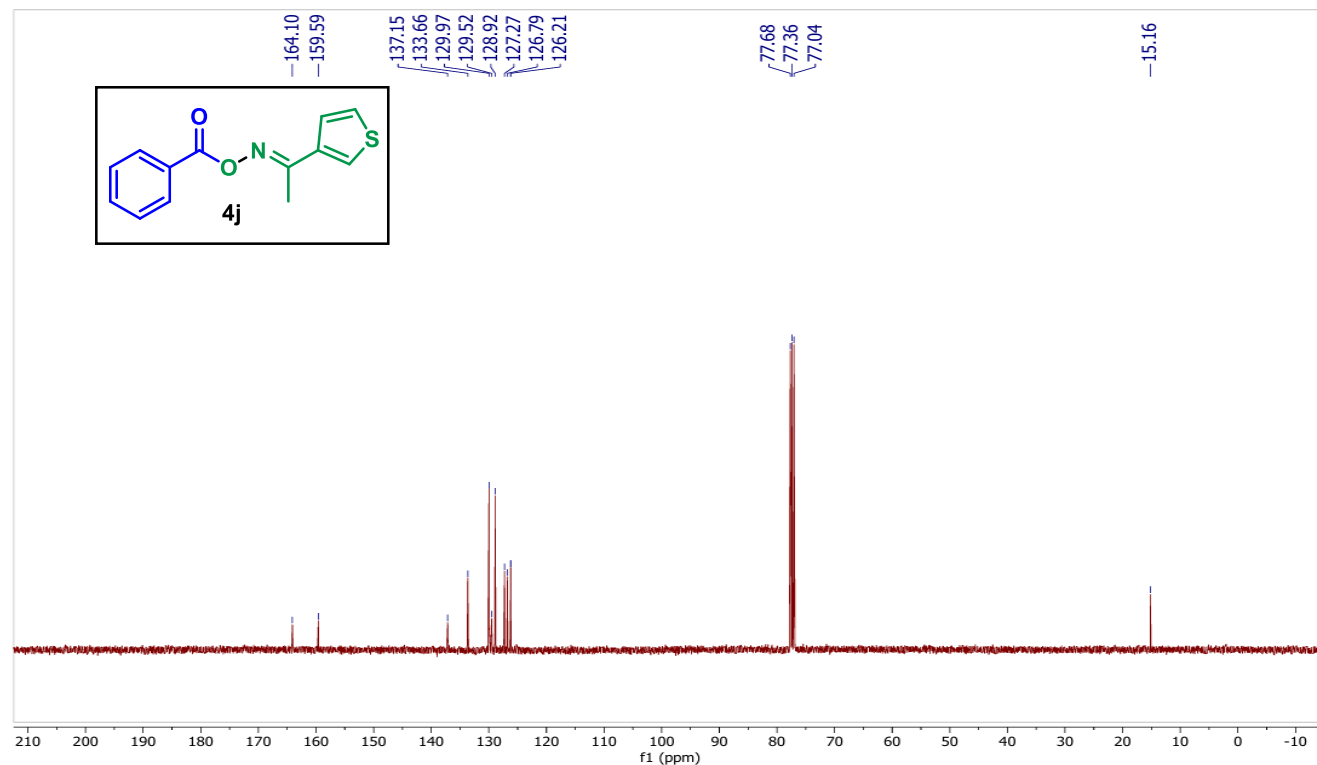

## 6.2 Copies of NMR spectra of the products

$^1\text{H}$  NMR of 3aa (400 MHz,  $\text{CDCl}_3$ )

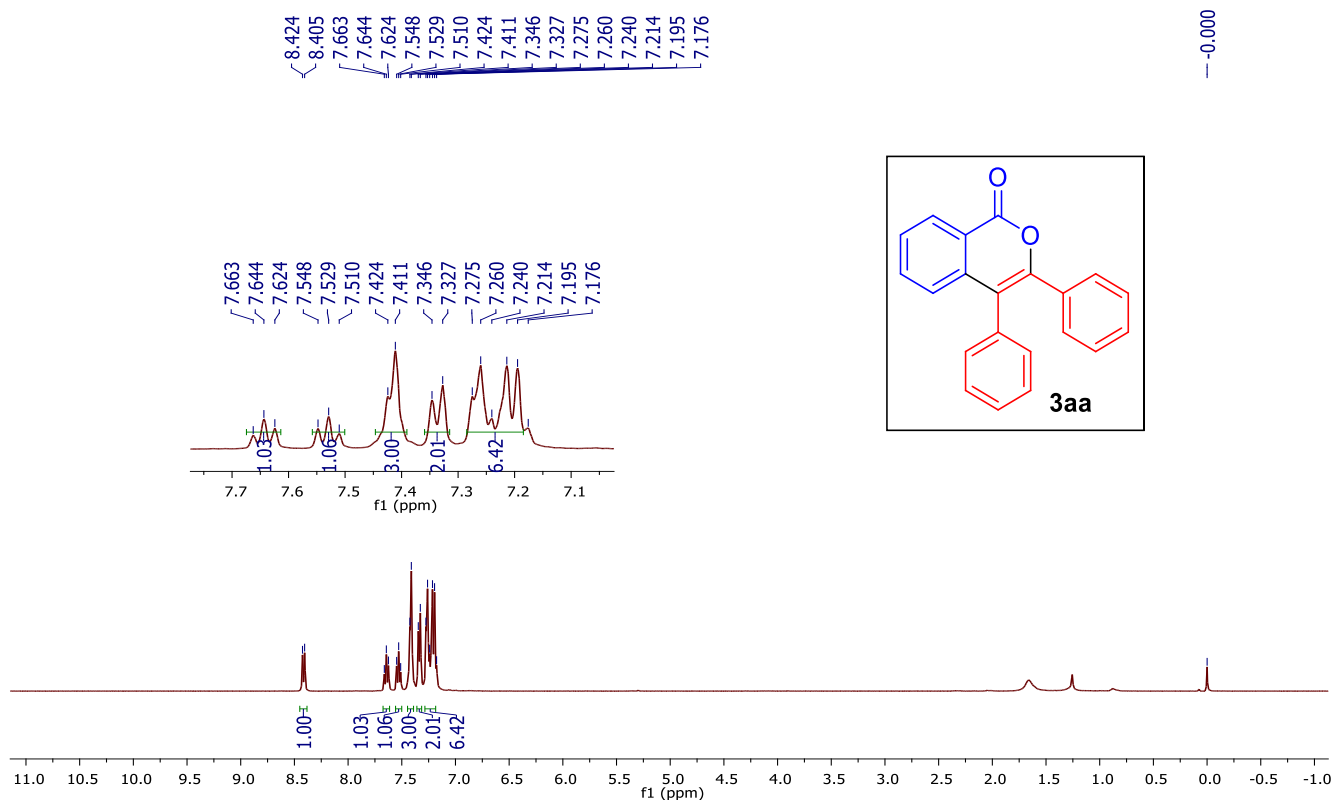

$^{13}\text{C}\{^1\text{H}\}$  NMR of 3aa (100 MHz,  $\text{CDCl}_3$ )

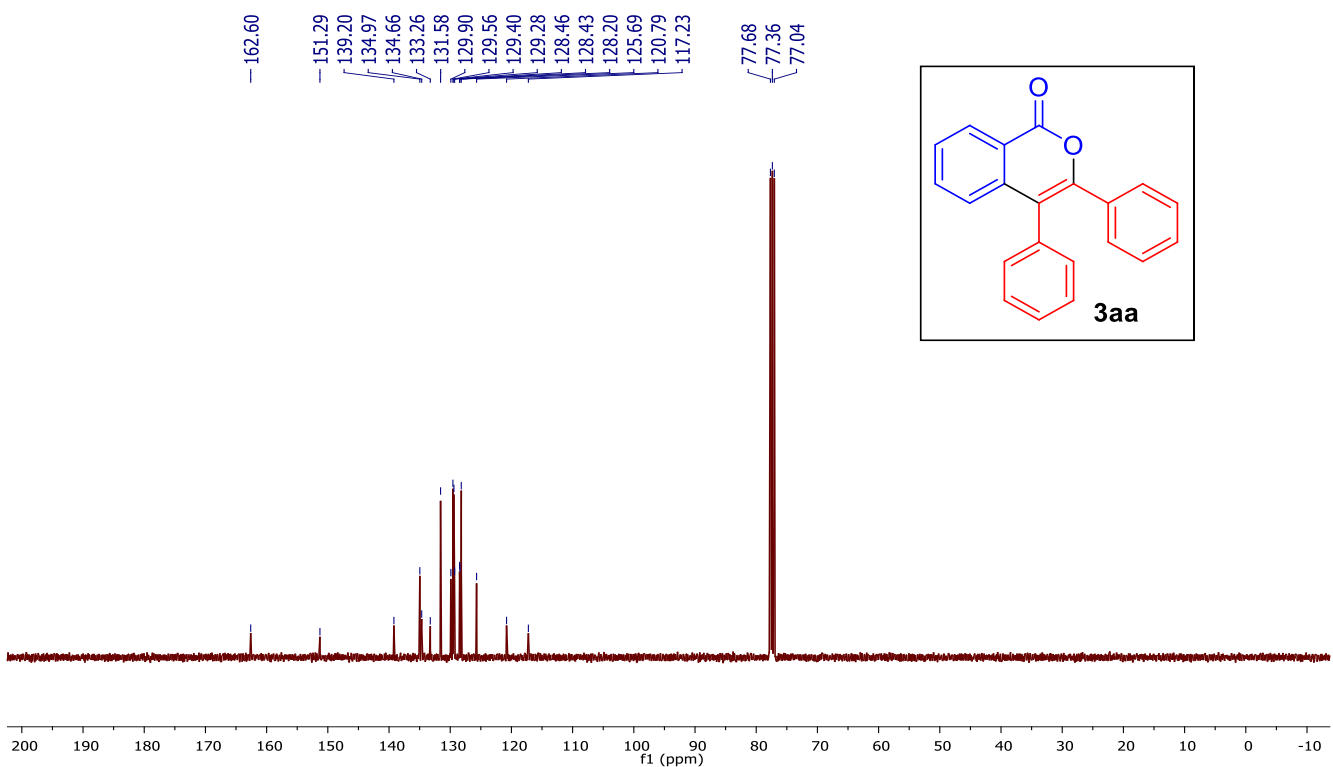

**<sup>1</sup>H NMR of 3ba (400 MHz, CDCl<sub>3</sub>)**

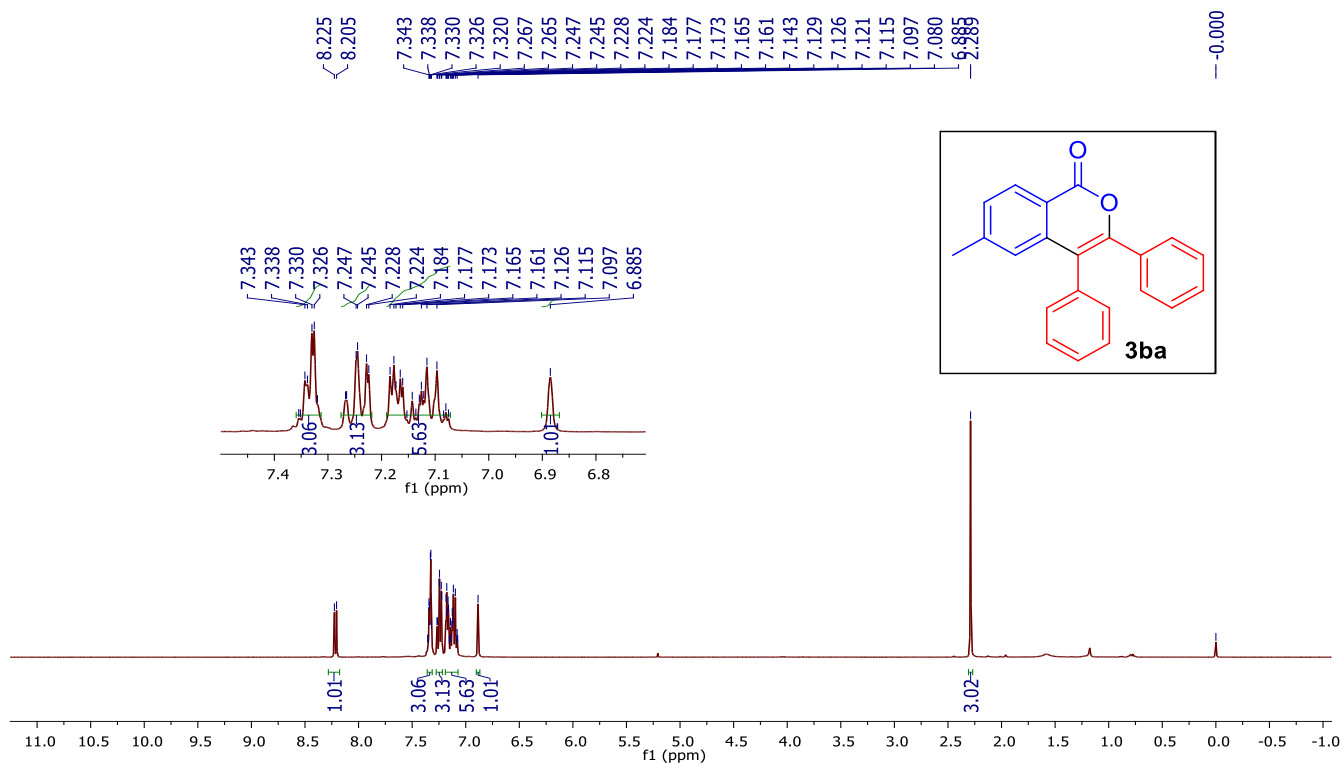

**<sup>13</sup>C{<sup>1</sup>H} NMR of 3ba (100 MHz, CDCl<sub>3</sub>)**

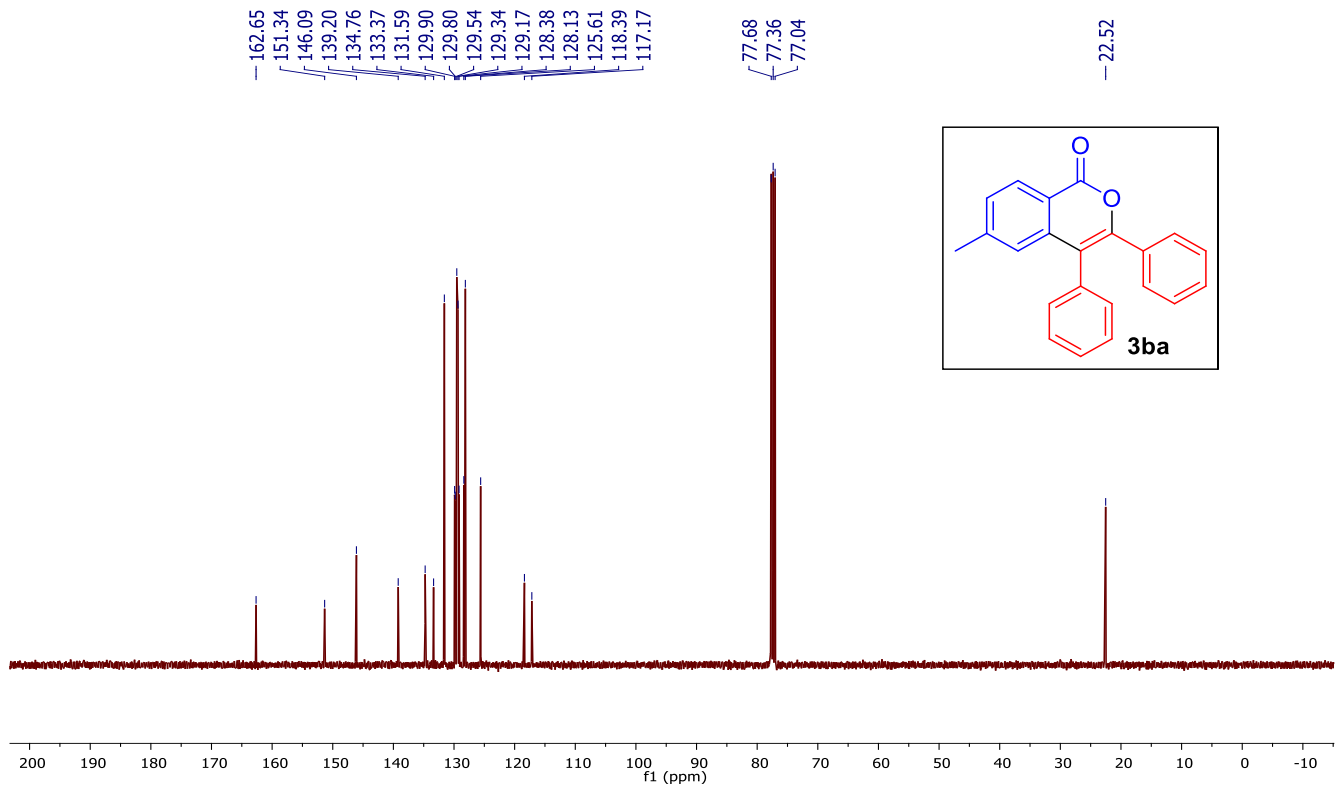

**<sup>1</sup>H NMR of 3ca (400 MHz, CDCl<sub>3</sub>)**

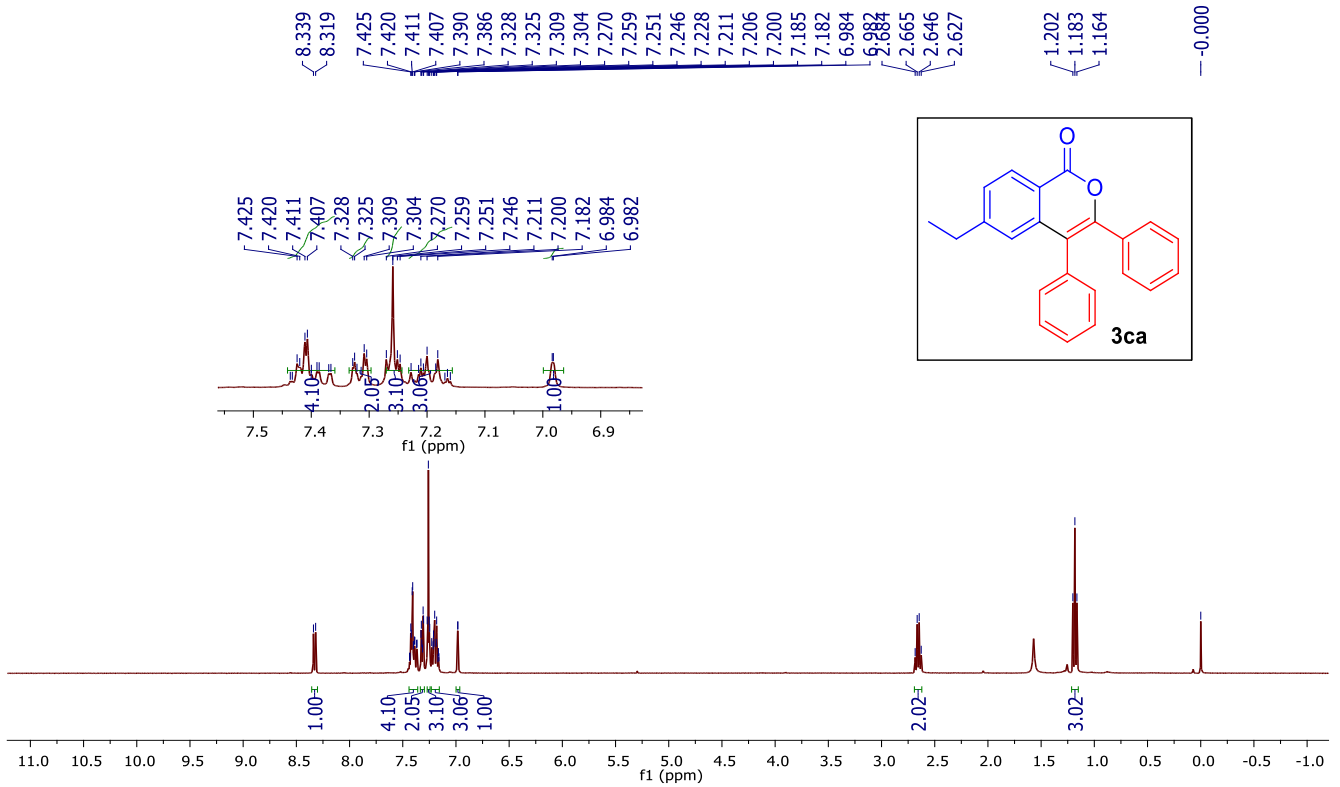

**<sup>13</sup>C{<sup>1</sup>H} NMR of 3ca (100 MHz, CDCl<sub>3</sub>)**

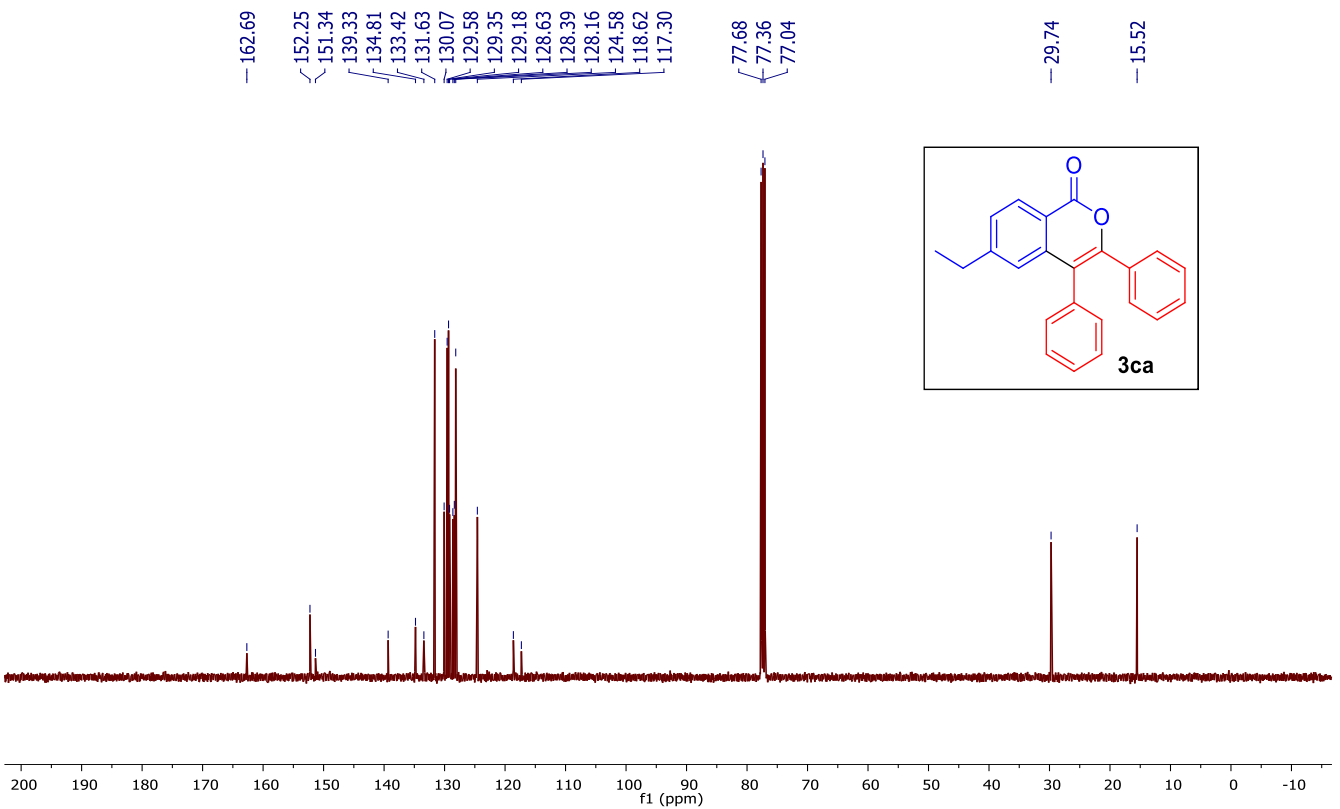

**<sup>1</sup>H NMR of 3da (400 MHz, CDCl<sub>3</sub>)**

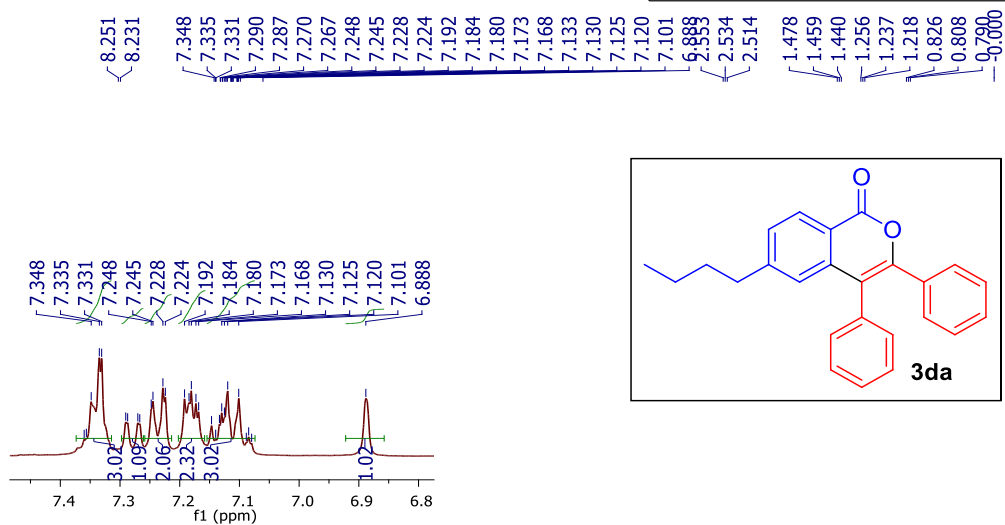

**<sup>13</sup>C{<sup>1</sup>H} NMR of 3da (100 MHz, CDCl<sub>3</sub>)**

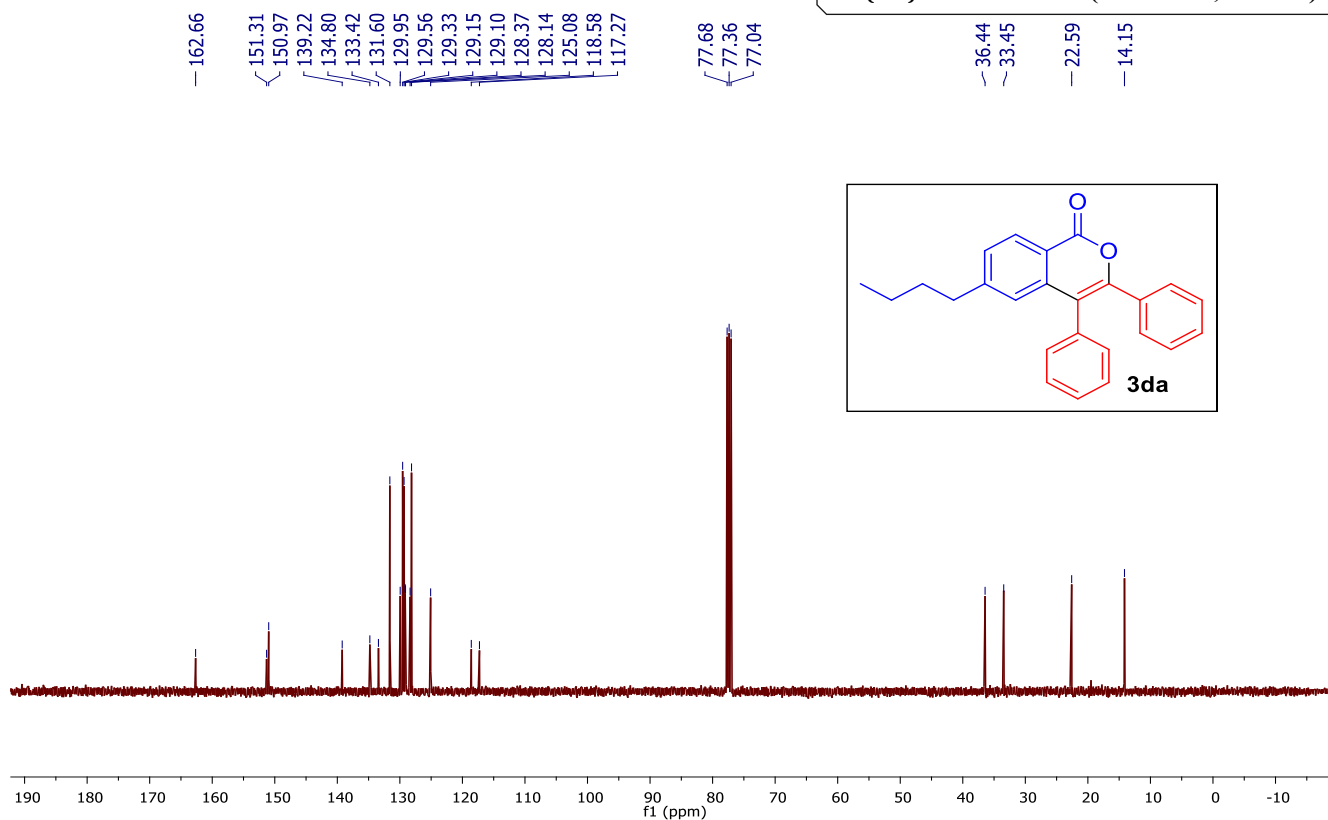

**<sup>1</sup>H NMR of 3ea (400 MHz, CDCl<sub>3</sub>)**

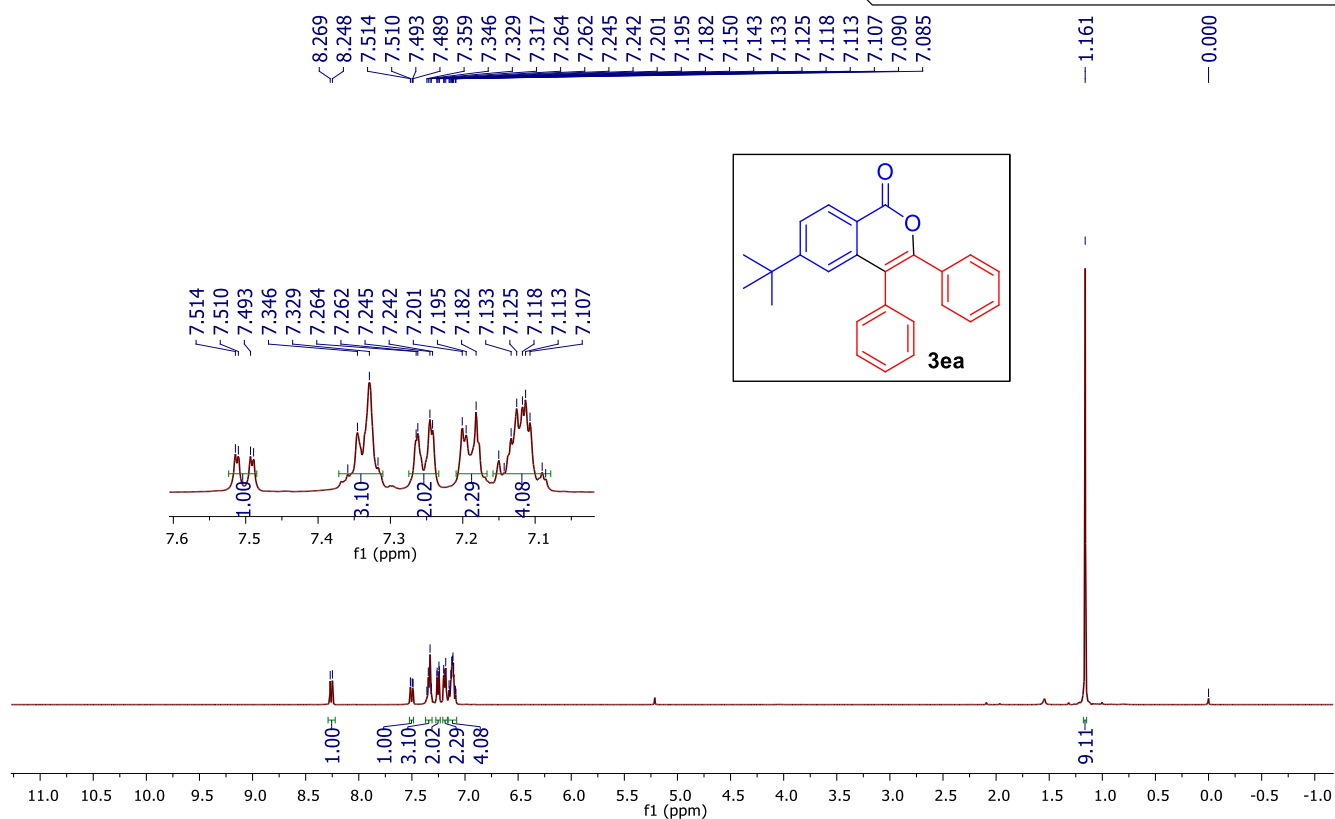

**<sup>13</sup>C{<sup>1</sup>H} NMR of 3ea (100 MHz, CDCl<sub>3</sub>)**

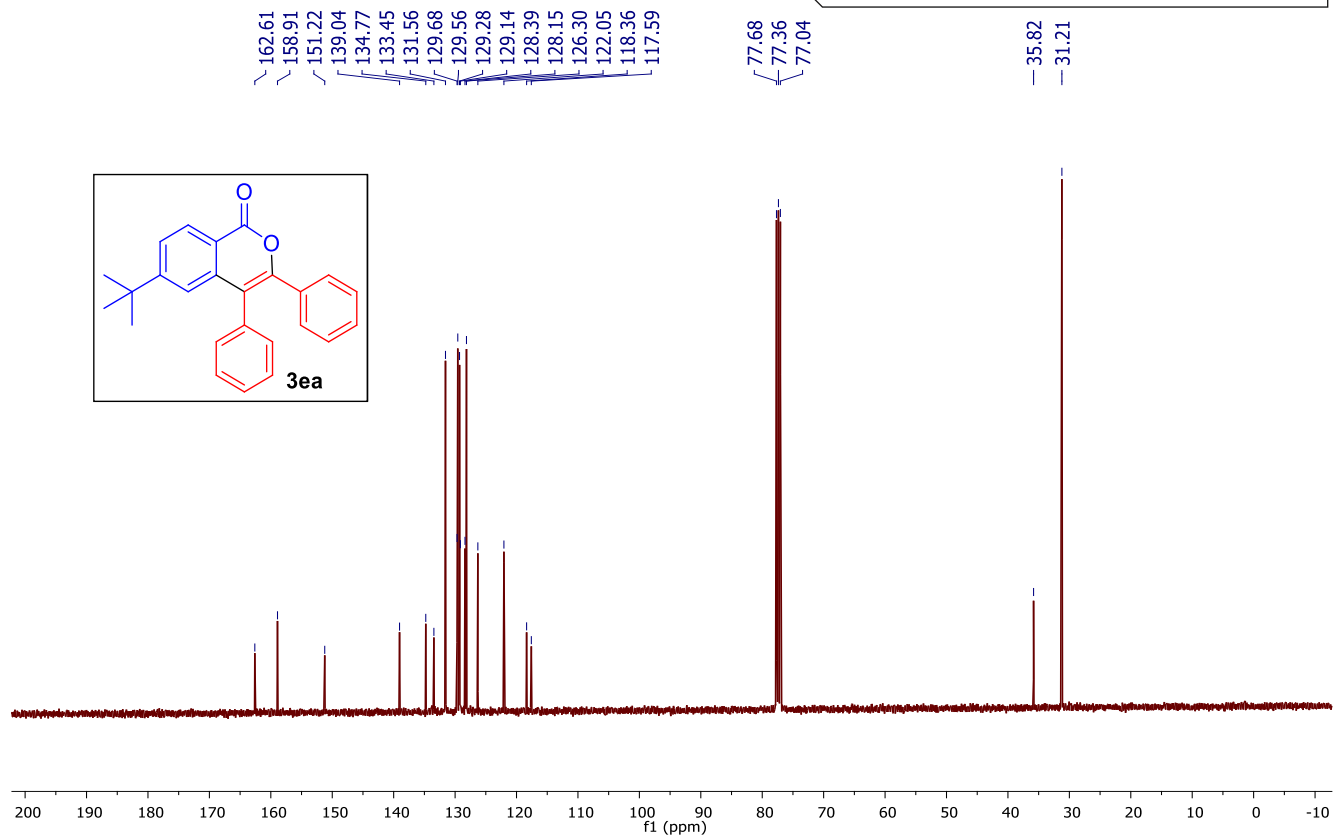

<sup>1</sup>H NMR of 3fa (400 MHz, CDCl<sub>3</sub>)

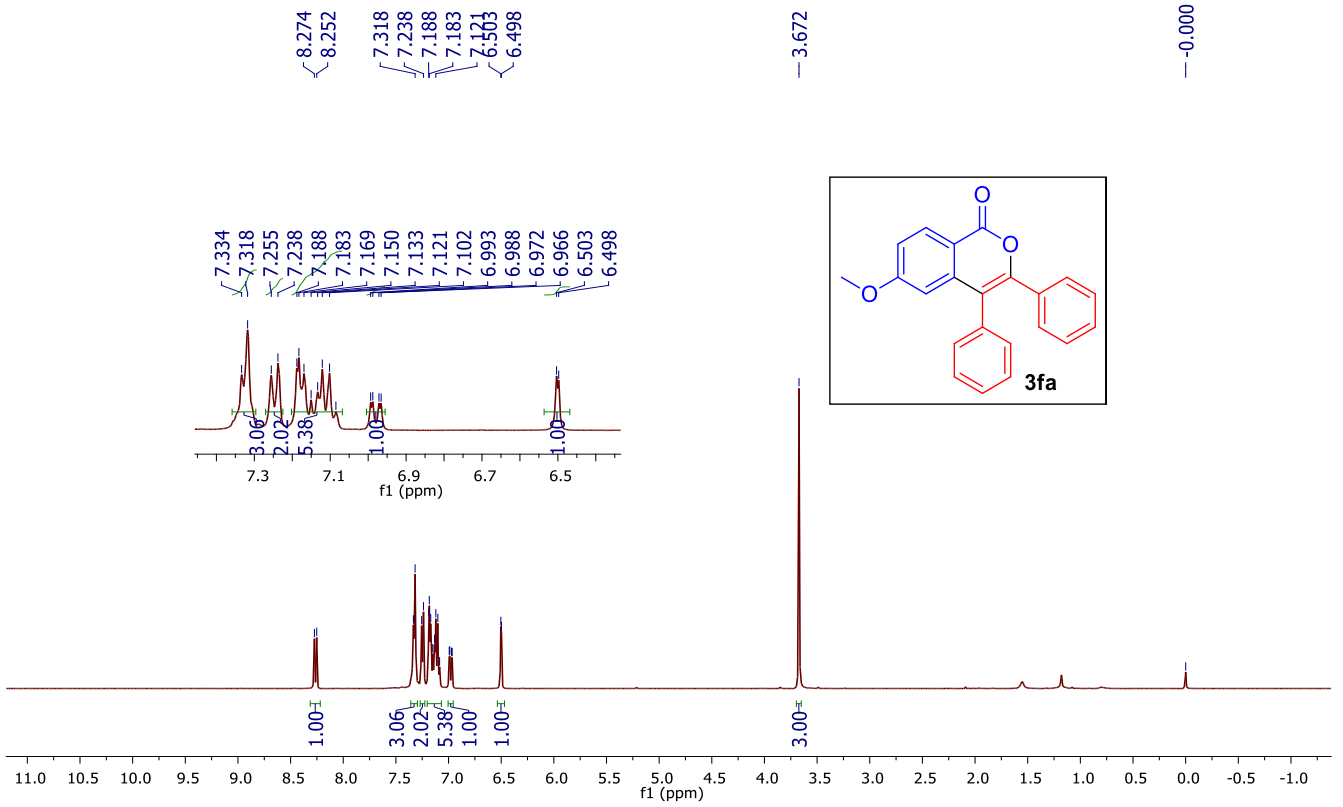

<sup>13</sup>C{<sup>1</sup>H} NMR of 3fa (100 MHz, CDCl<sub>3</sub>)

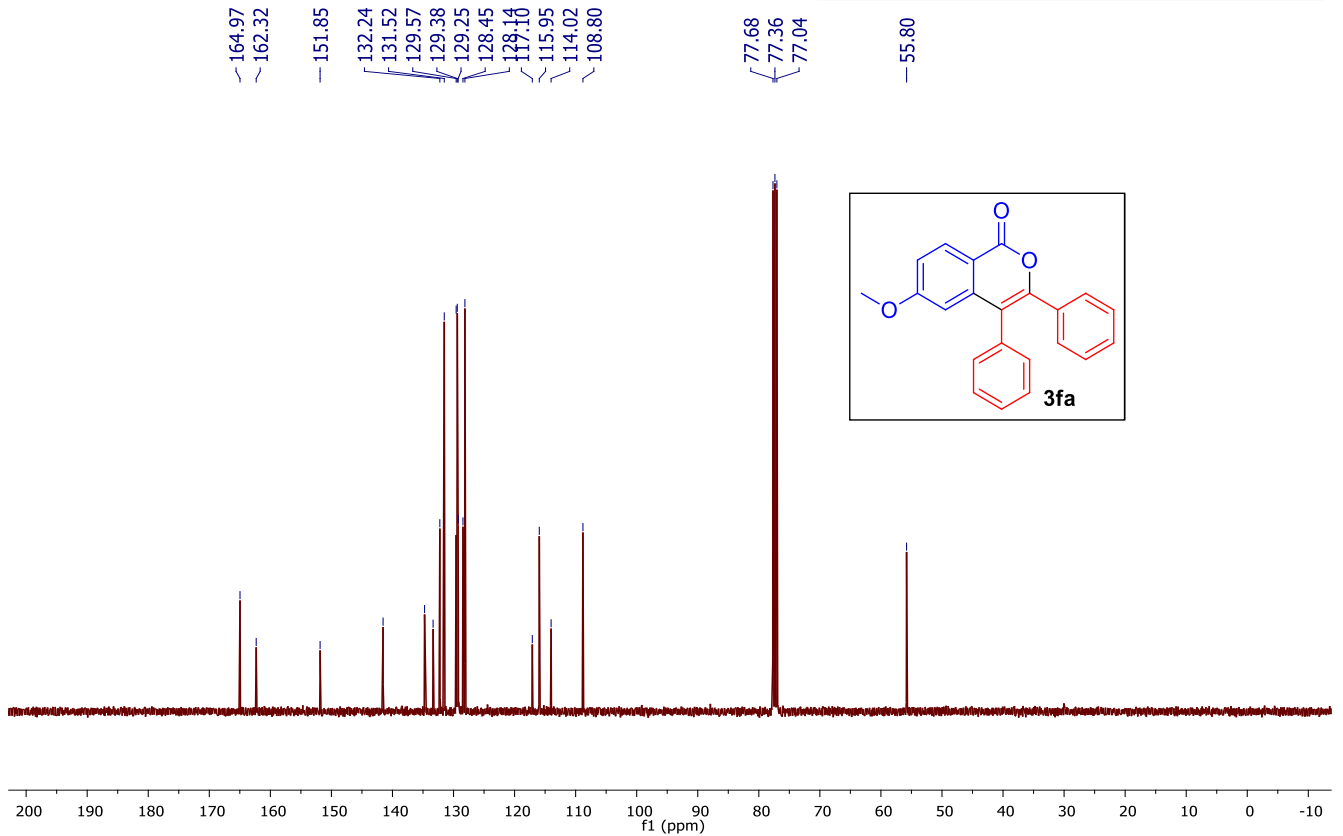

**<sup>1</sup>H NMR of 3ga (400 MHz, CDCl<sub>3</sub>)**

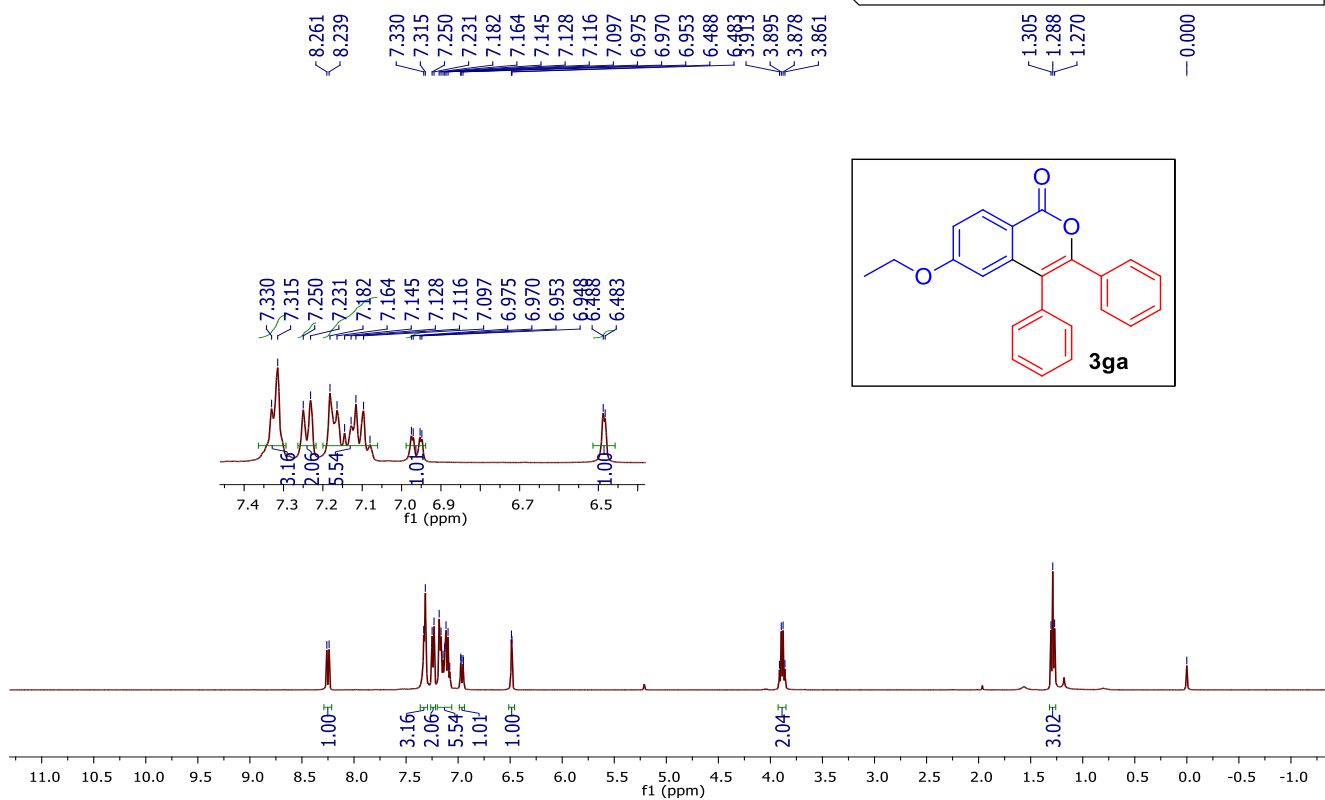

**<sup>13</sup>C{<sup>1</sup>H} NMR of 3ga (100 MHz, CDCl<sub>3</sub>)**

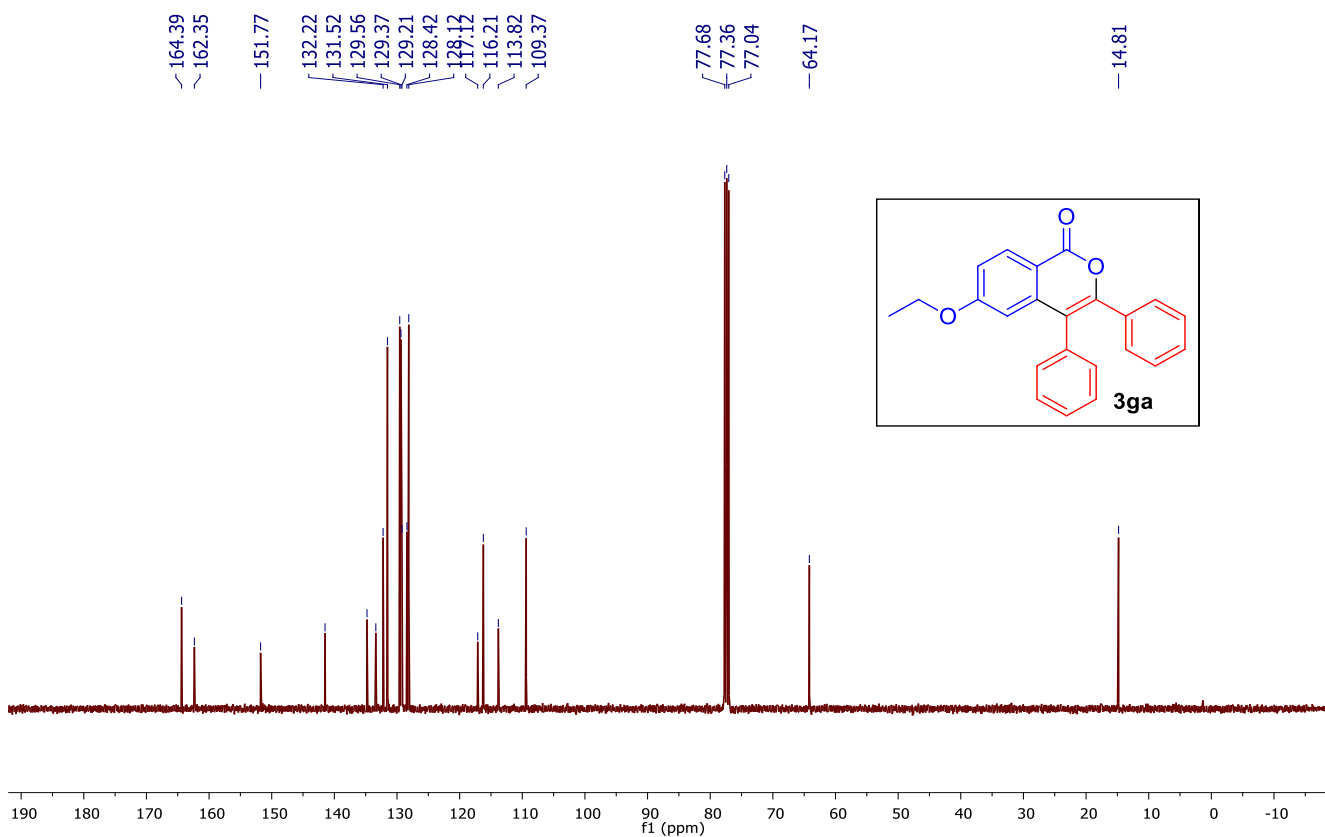

**<sup>1</sup>H NMR of 3ha (400 MHz, CDCl<sub>3</sub>)**

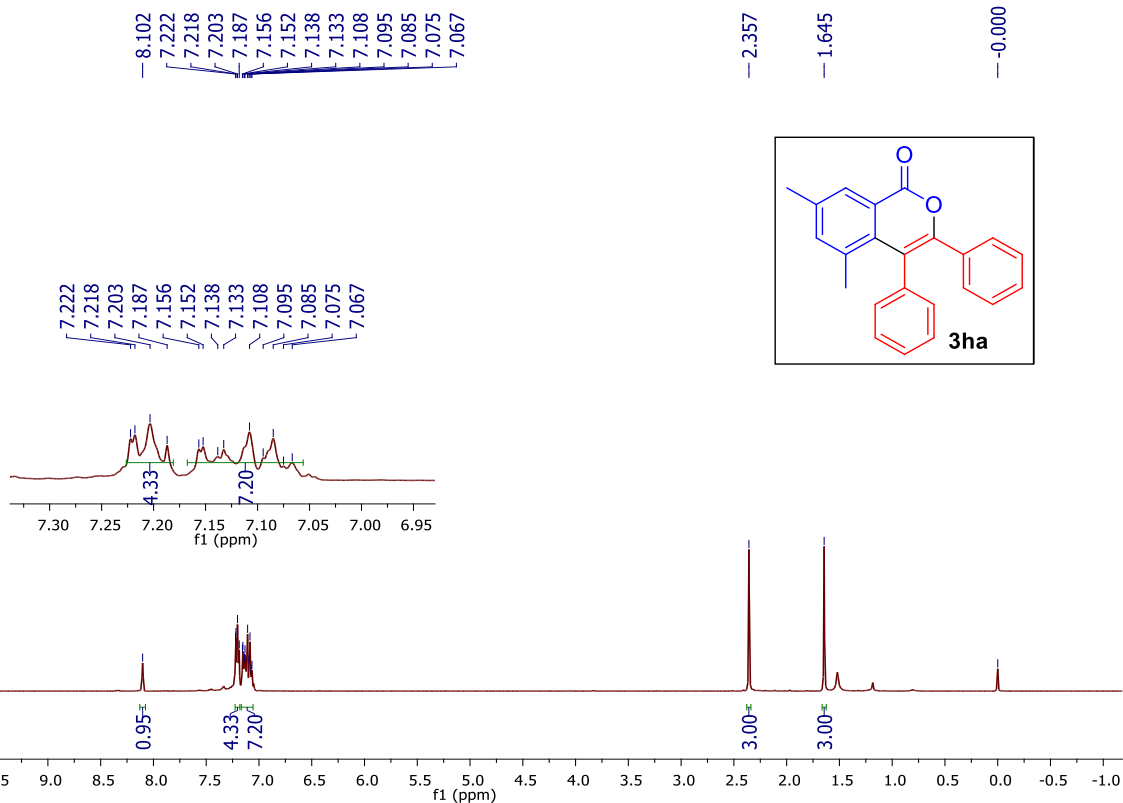

**<sup>13</sup>C{<sup>1</sup>H} NMR of 3ha (100 MHz, CDCl<sub>3</sub>)**

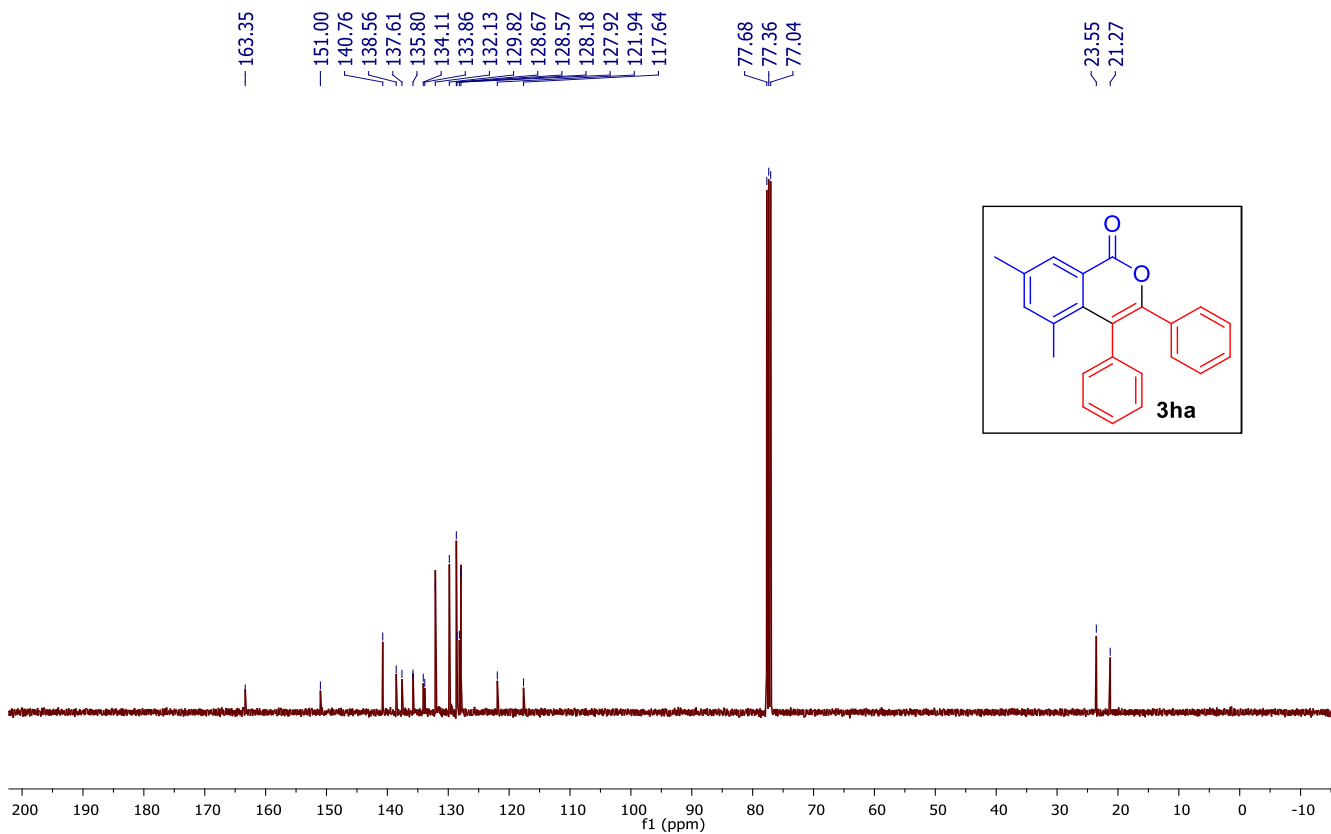

**<sup>1</sup>H NMR of 3ia (400 MHz, CDCl<sub>3</sub>)**

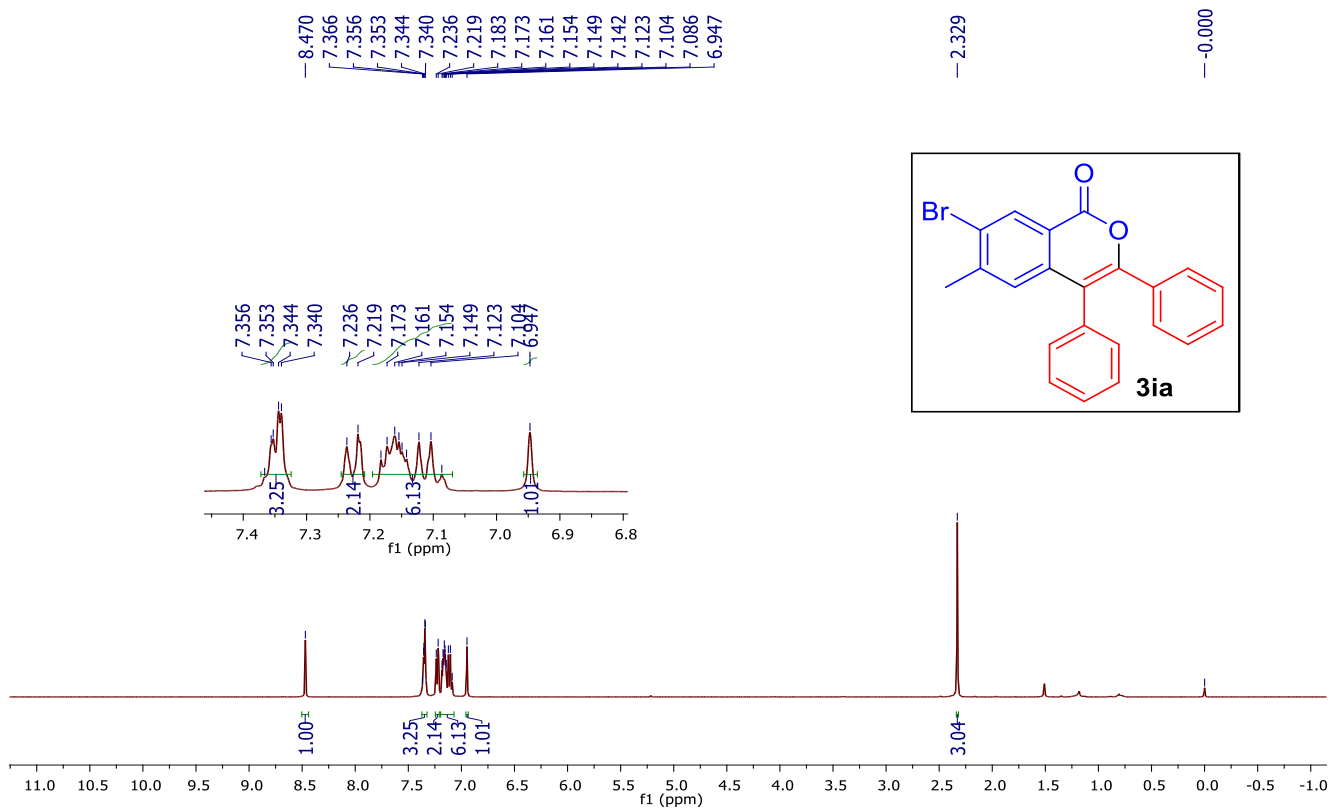

**<sup>13</sup>C{<sup>1</sup>H} NMR of 3ia (100 MHz, CDCl<sub>3</sub>)**

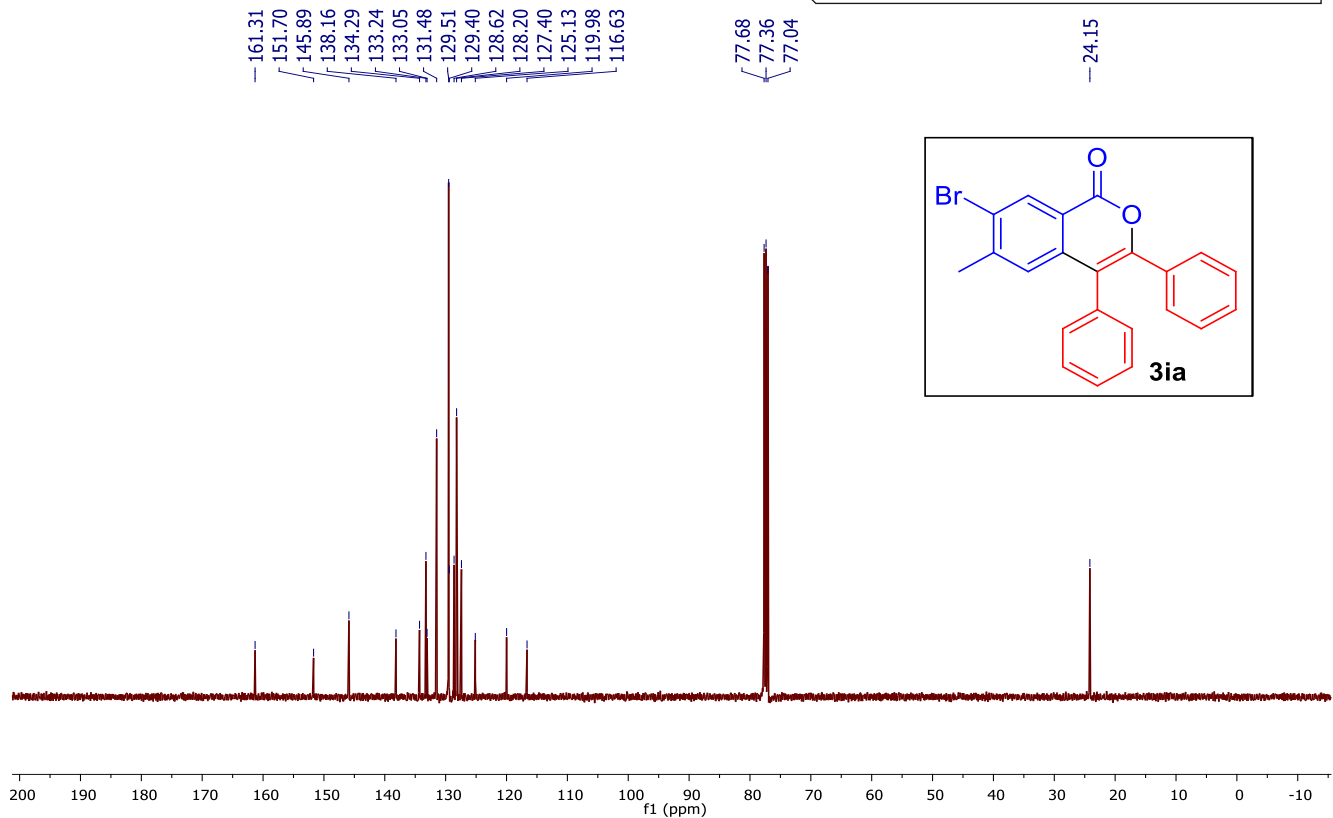

**<sup>1</sup>H NMR of 3ja (400 MHz, CDCl<sub>3</sub>)**

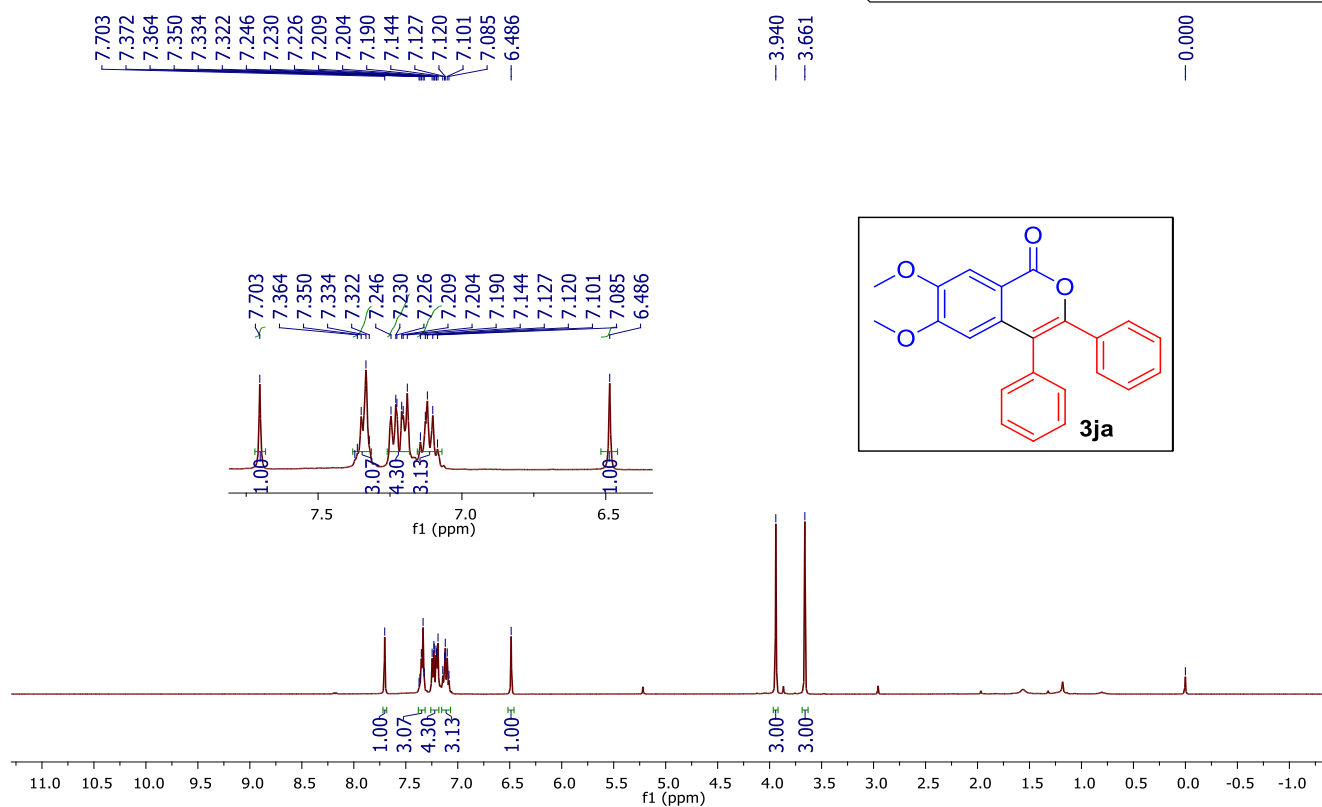

**<sup>13</sup>C{<sup>1</sup>H} NMR of 3ja (100 MHz, CDCl<sub>3</sub>)**

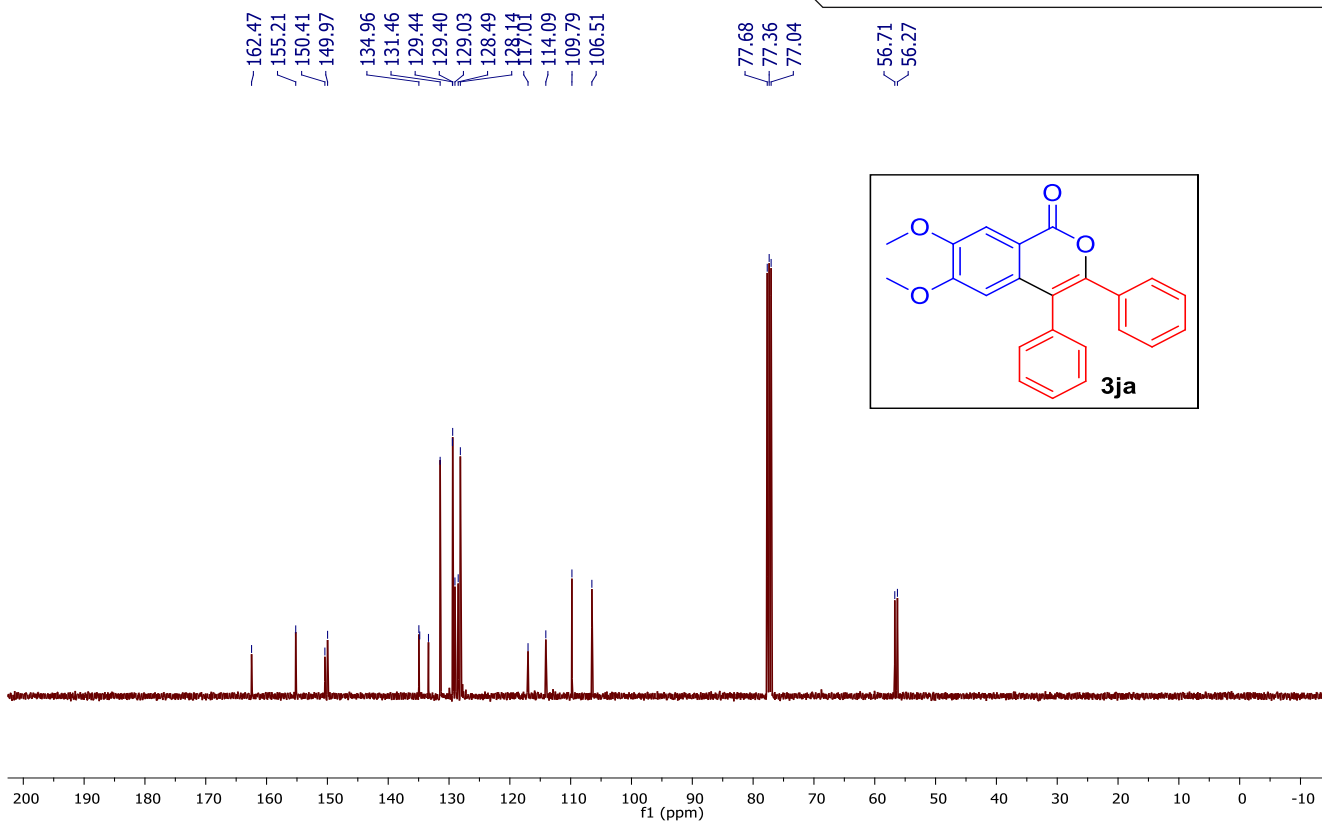

**<sup>1</sup>H NMR of 3ka (400 MHz, CDCl<sub>3</sub>)**

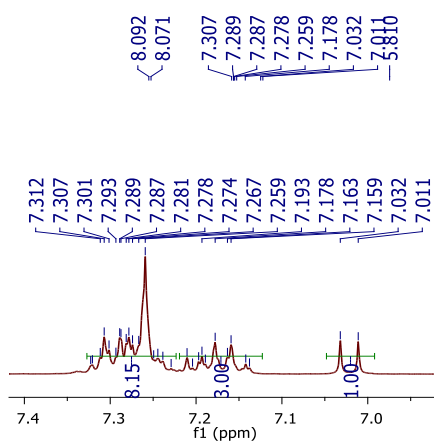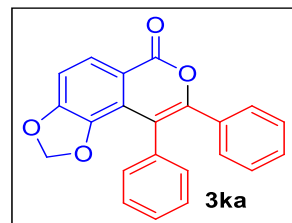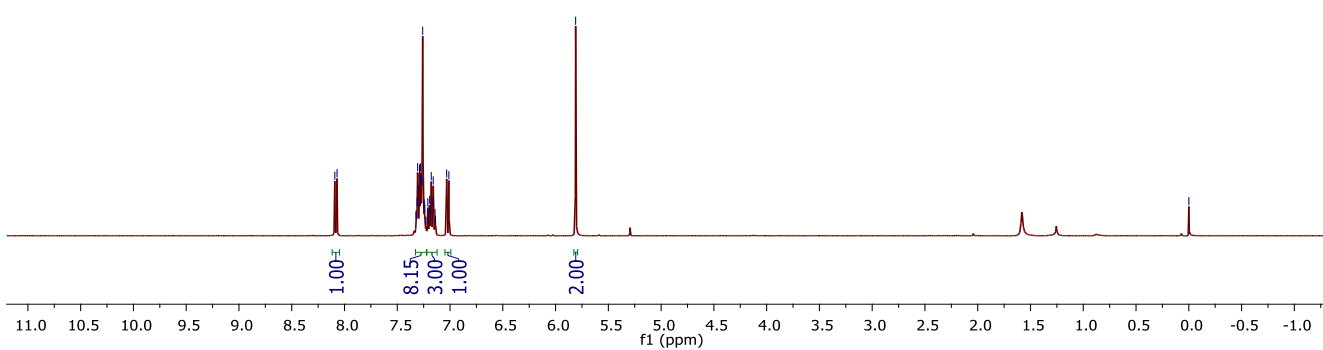

**<sup>13</sup>C{<sup>1</sup>H} NMR of 3ka (100 MHz, CDCl<sub>3</sub>)**

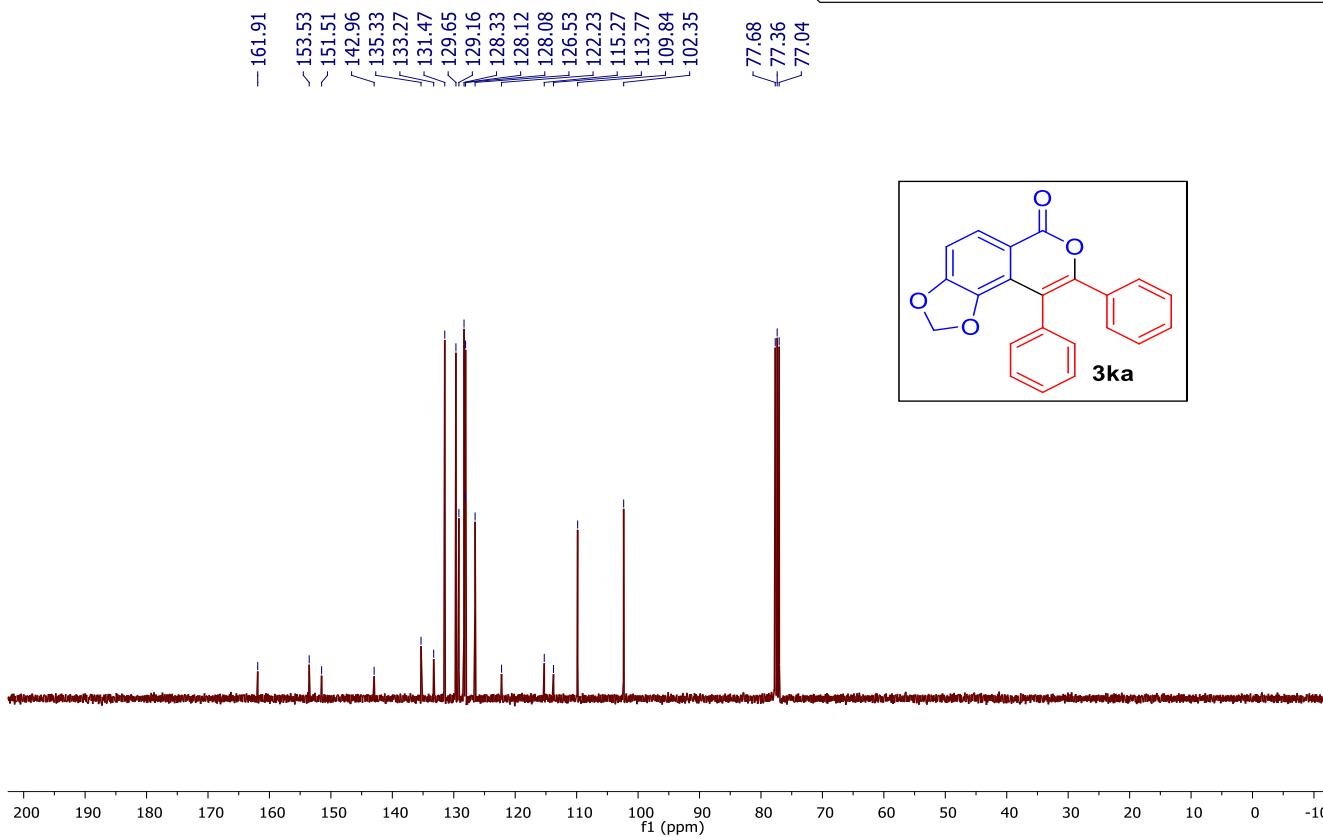

**<sup>1</sup>H NMR of 3la (400 MHz, CDCl<sub>3</sub>)**

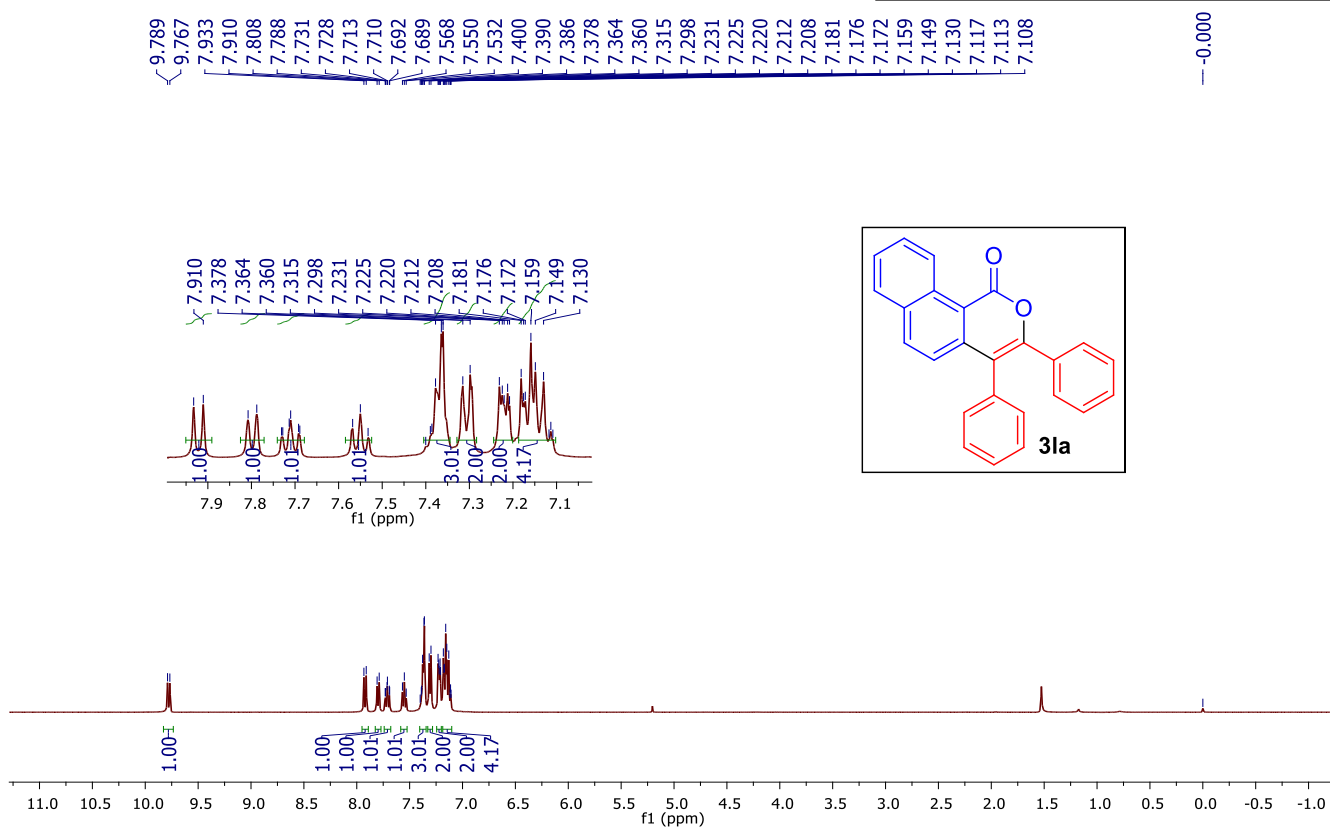

**<sup>13</sup>C{<sup>1</sup>H} NMR of 3la (100 MHz, CDCl<sub>3</sub>)**

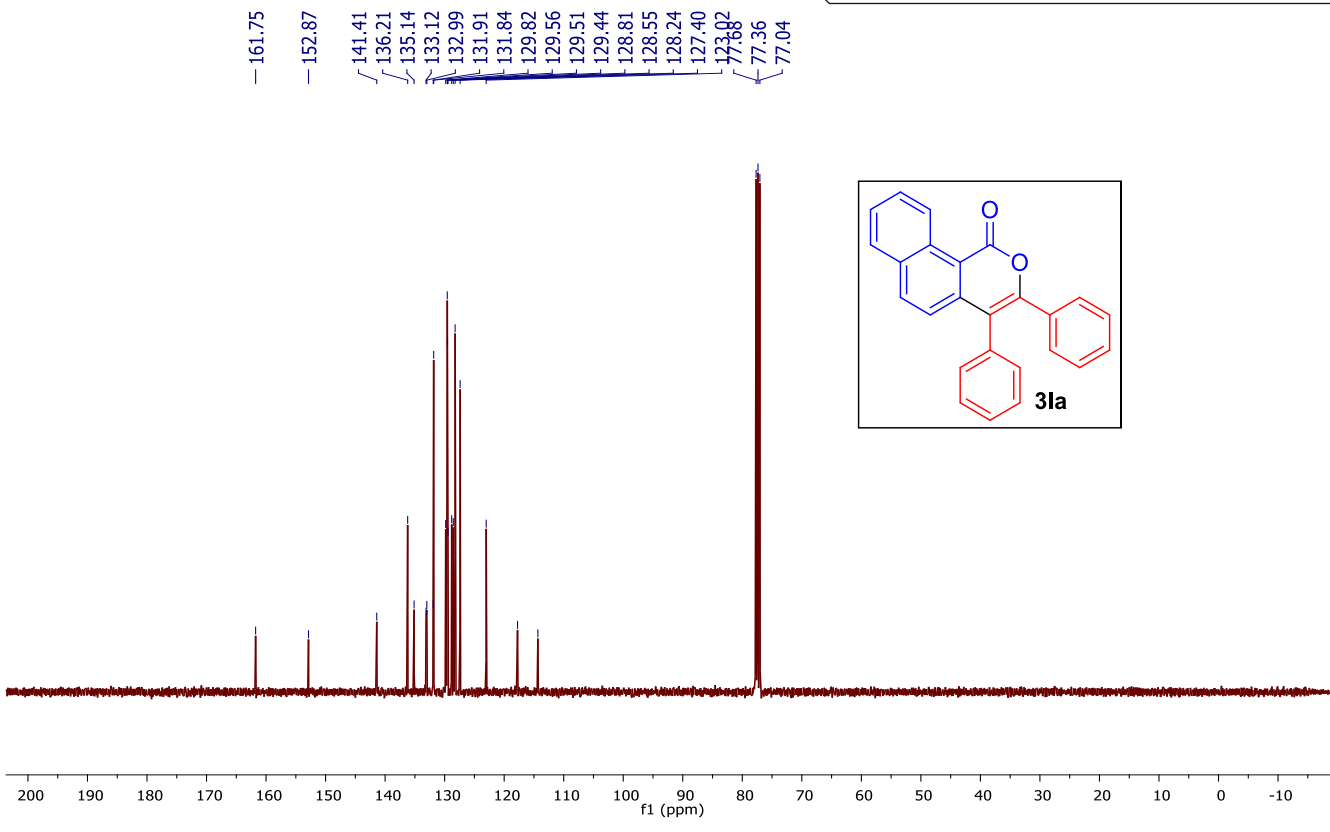

**<sup>1</sup>H NMR of 3ma (400 MHz, CDCl<sub>3</sub>)**

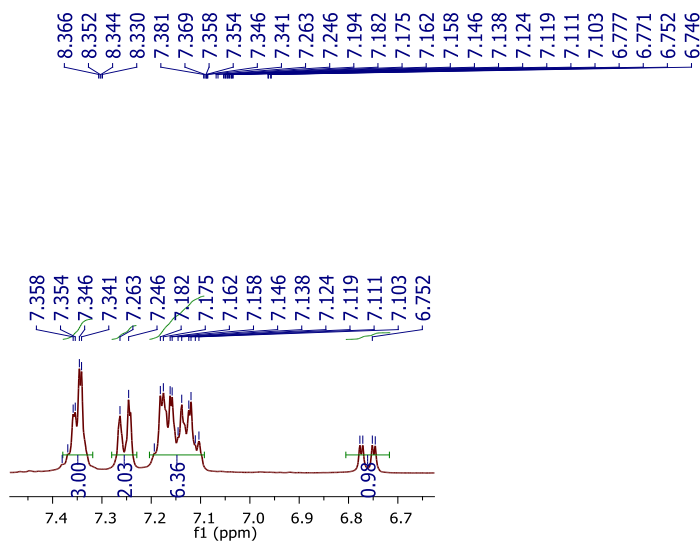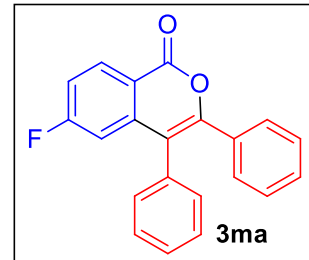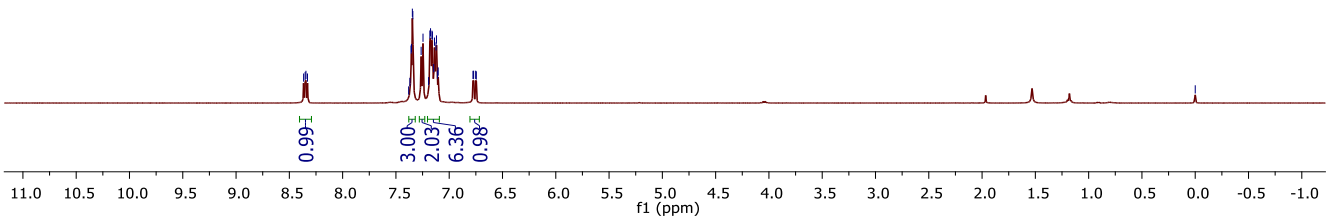

**<sup>13</sup>C {<sup>1</sup>H} NMR of 3ma (100 MHz, CDCl<sub>3</sub>)**

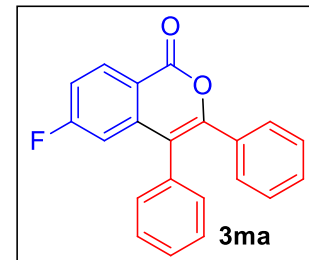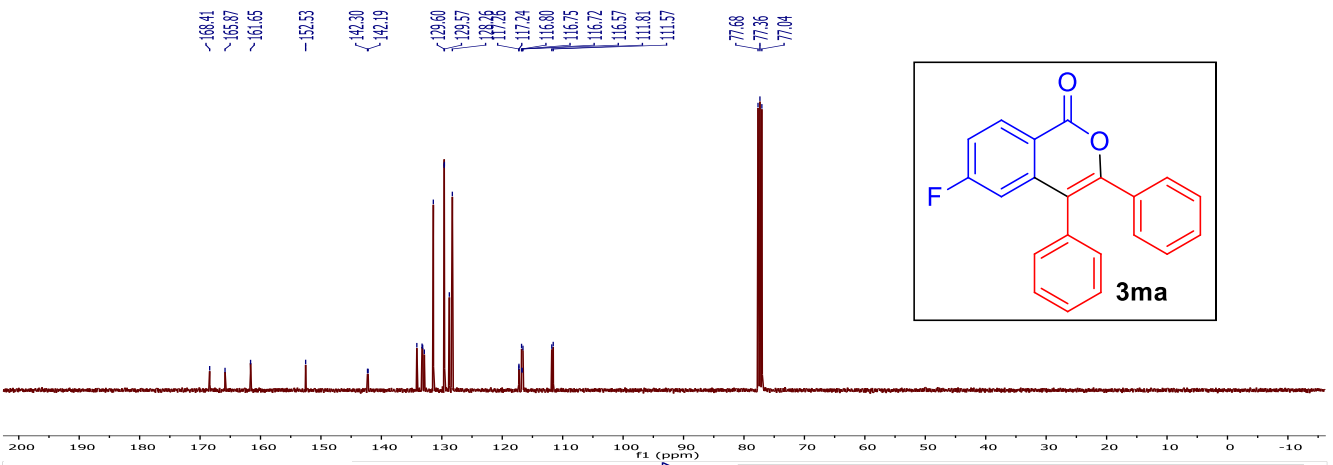

**<sup>19</sup>F NMR of 3ma (376 MHz, CDCl<sub>3</sub>)**

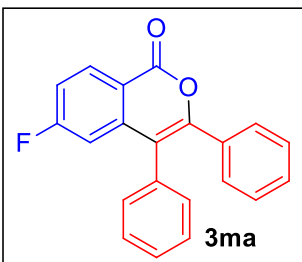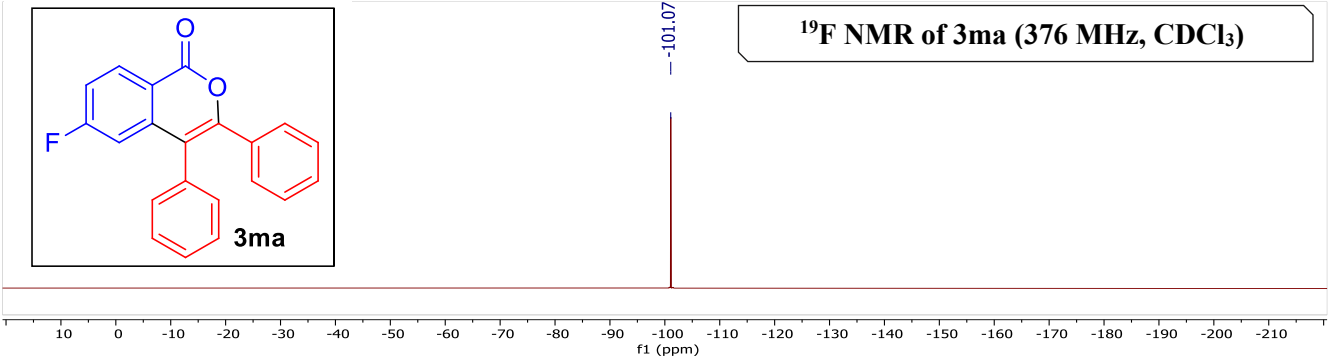

**<sup>1</sup>H NMR of 3na (400 MHz, CDCl<sub>3</sub>)**

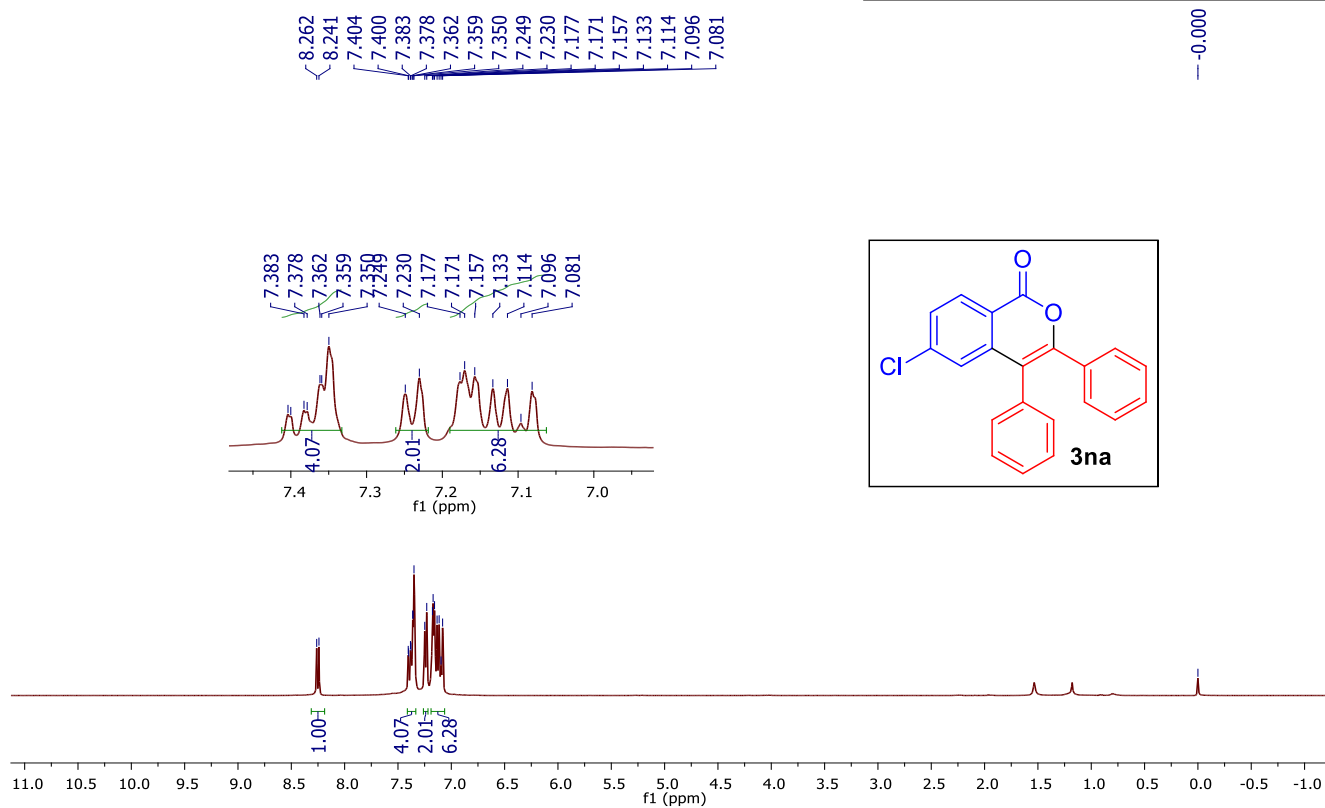

**<sup>13</sup>C{<sup>1</sup>H} NMR of 3na (100 MHz, CDCl<sub>3</sub>)**

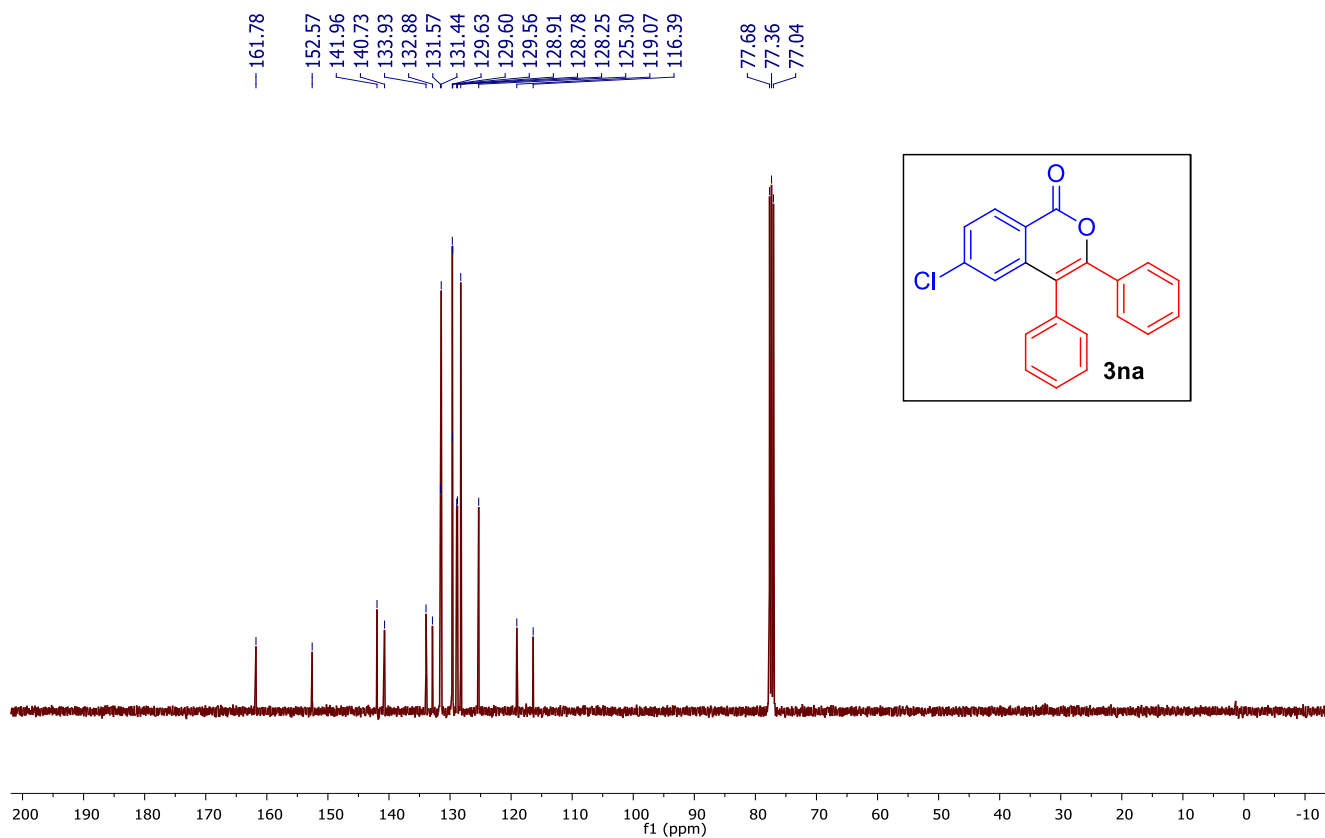

**<sup>1</sup>H NMR of 3oa (400 MHz, CDCl<sub>3</sub>)**

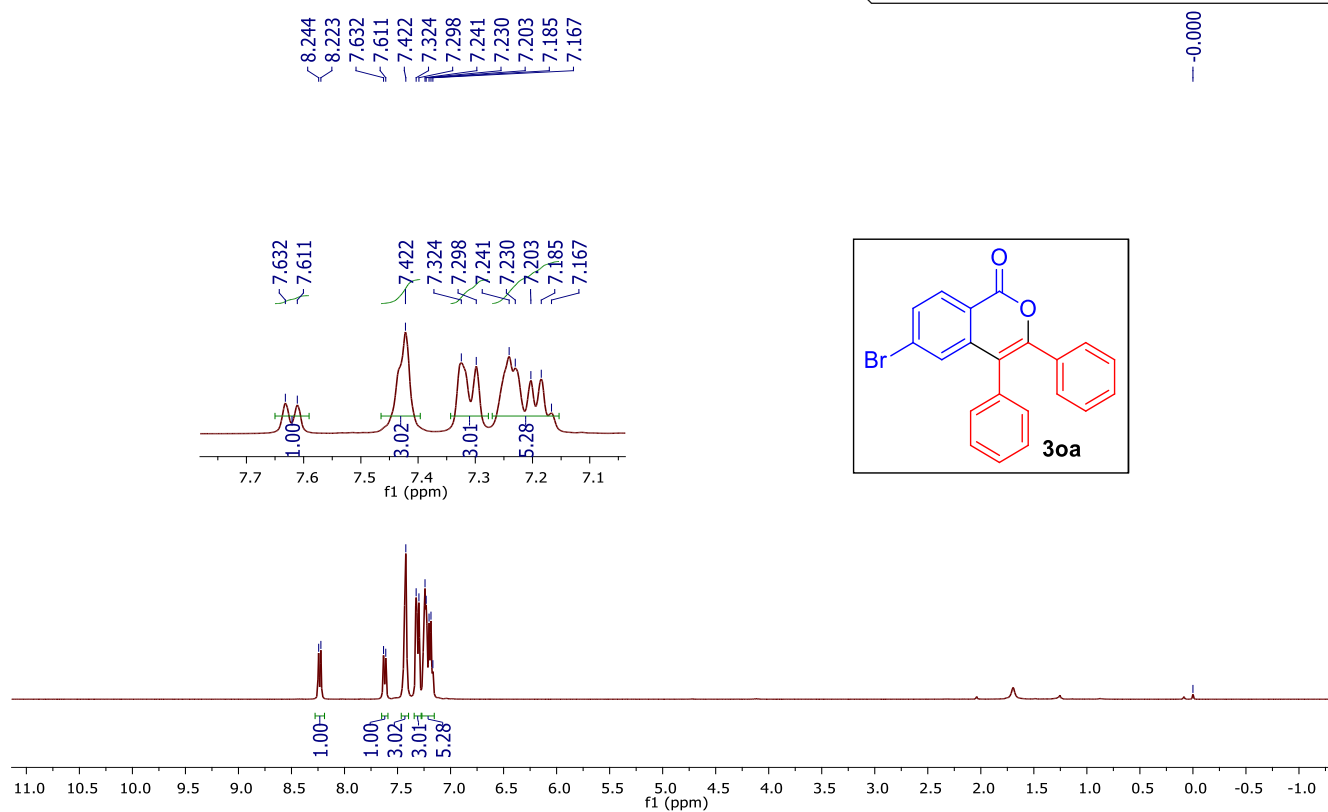

**<sup>13</sup>C{<sup>1</sup>H} NMR of 3oa (100 MHz, CDCl<sub>3</sub>)**

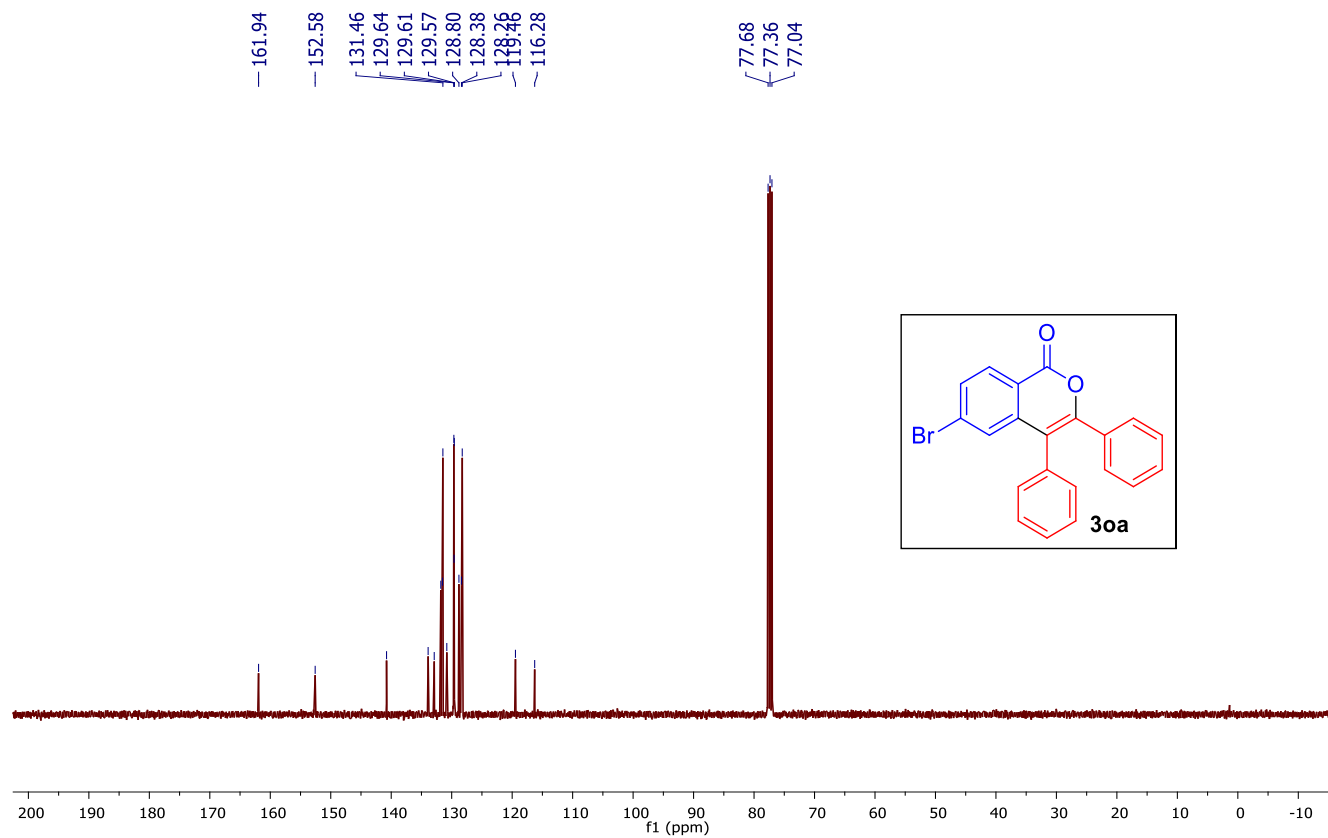

**<sup>1</sup>H NMR of 3pa (400 MHz, CDCl<sub>3</sub>)**

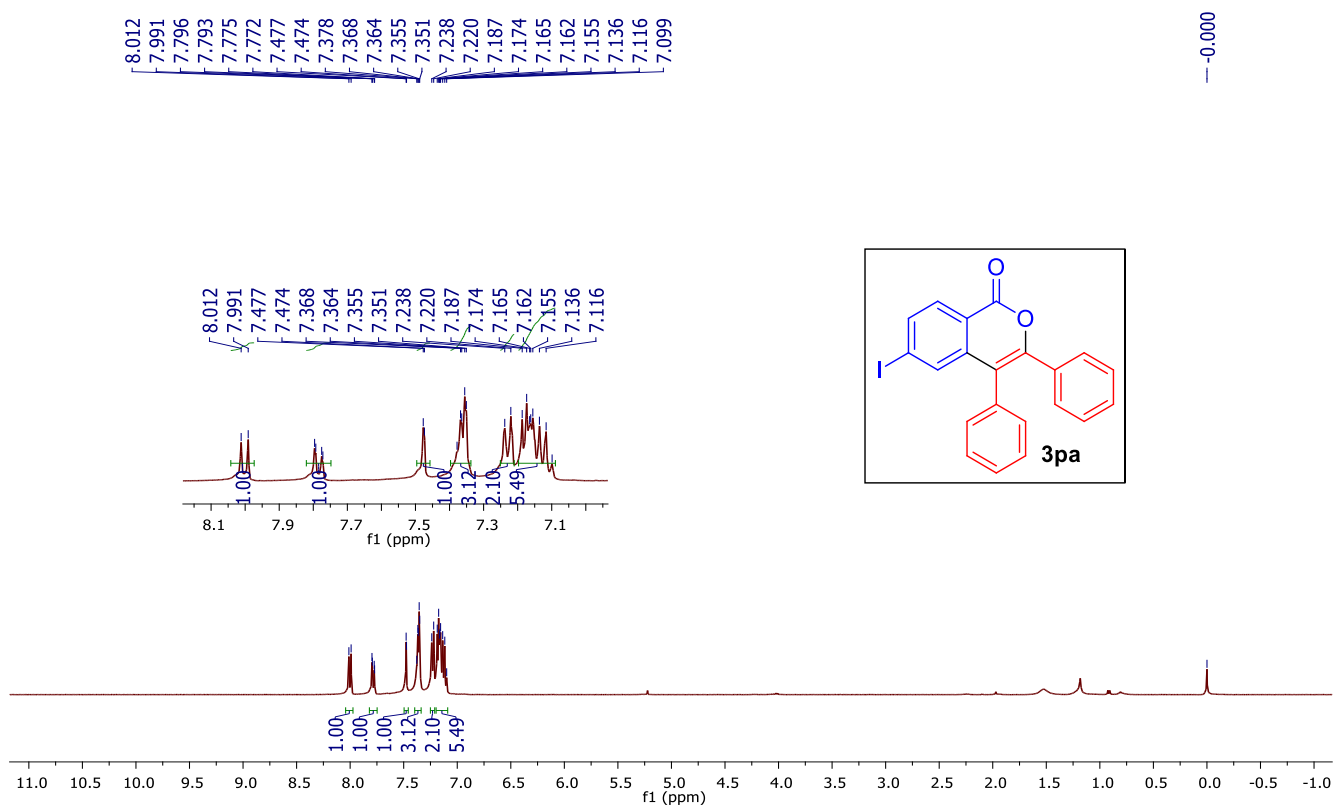

**<sup>13</sup>C{<sup>1</sup>H} NMR of 3pa (100 MHz, CDCl<sub>3</sub>)**

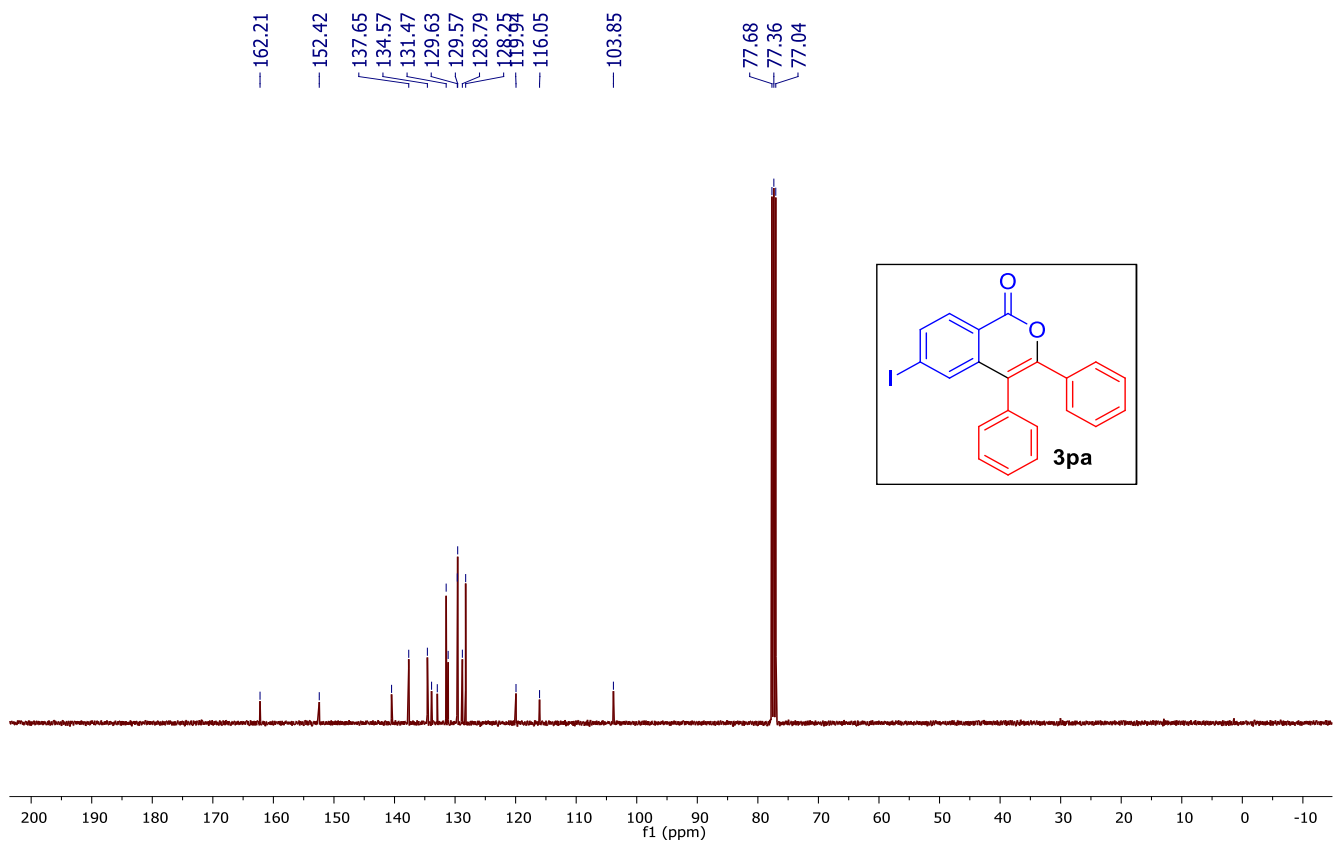

**<sup>1</sup>H NMR of 3qa (700 MHz, CDCl<sub>3</sub>)**

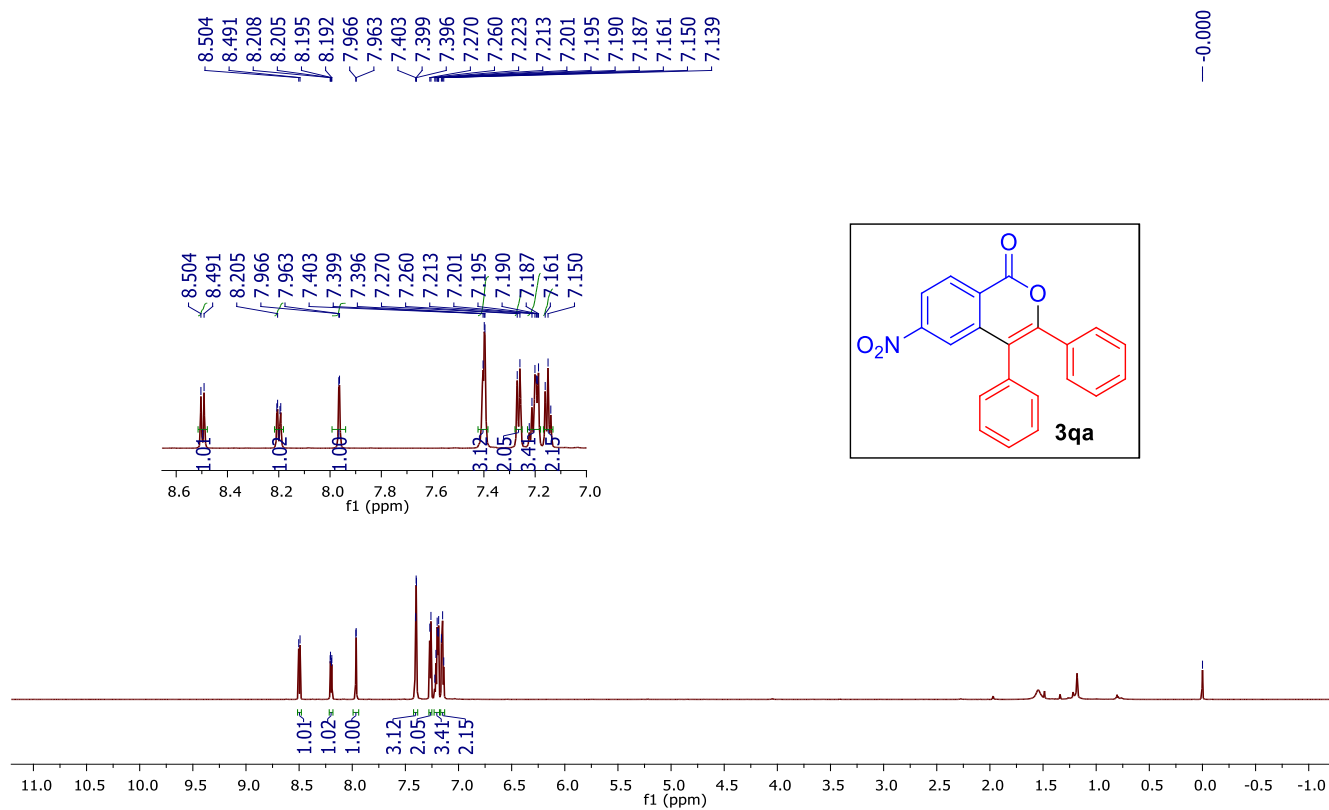

**<sup>13</sup>C{<sup>1</sup>H} NMR of 3qa (176 MHz, CDCl<sub>3</sub>)**

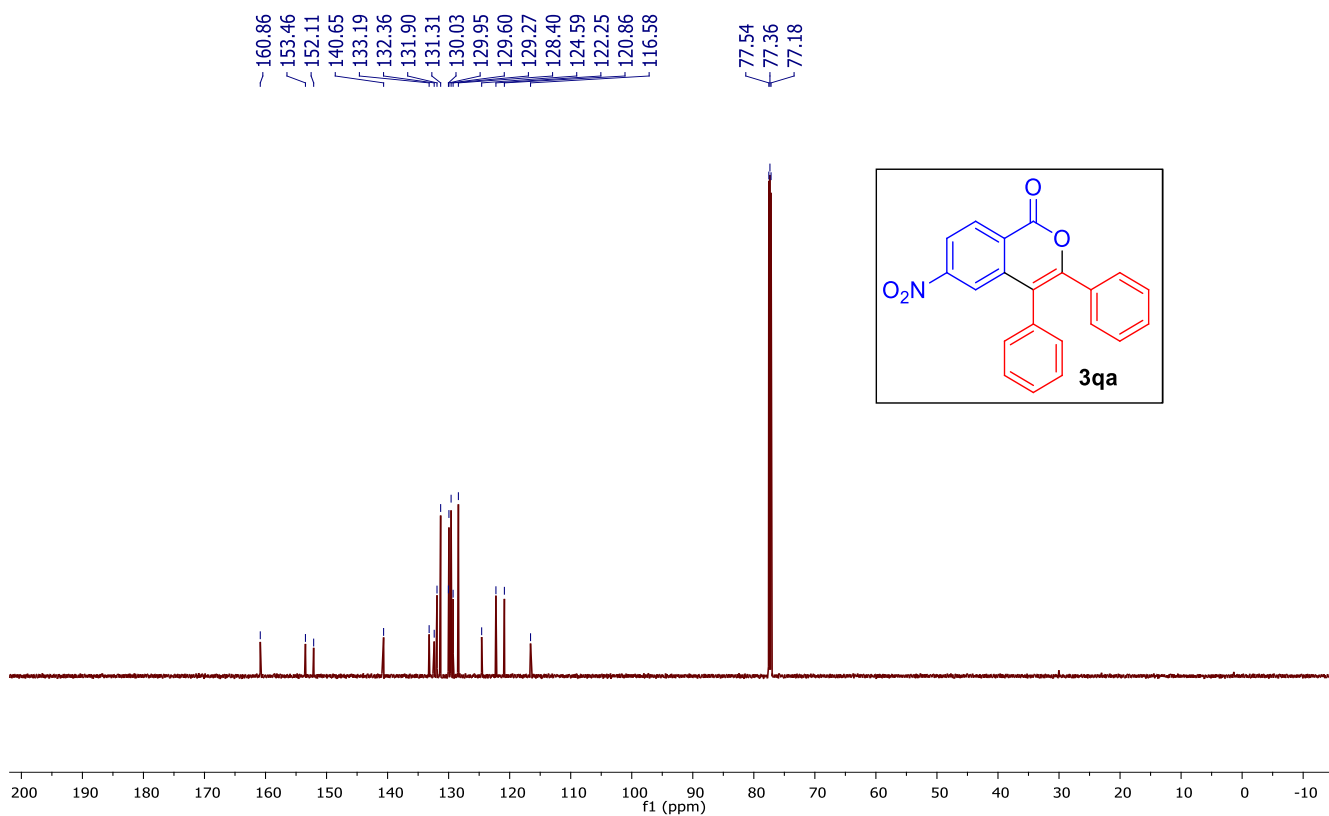

**<sup>1</sup>H NMR of 3ra (400 MHz, CDCl<sub>3</sub>)**

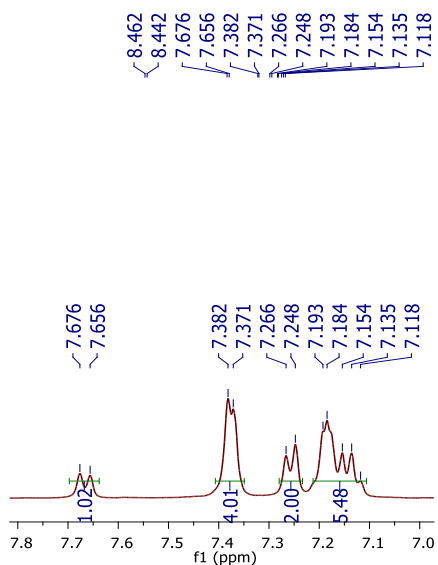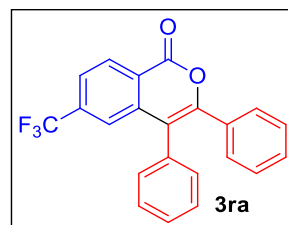

0.000

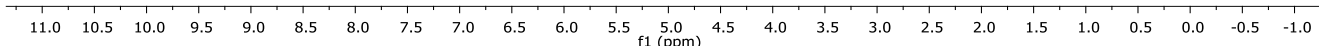

**<sup>13</sup>C{<sup>1</sup>H} NMR of 3ra (100 MHz, CDCl<sub>3</sub>)**

161.45, 152.75, 139.72, 133.62, 132.72, 131.41, 130.92, 129.75, 128.99, 128.33, 124.66, 124.63, 124.59, 123.13, 122.71, 122.67, 116.71, 116.81, 77.36, 77.04

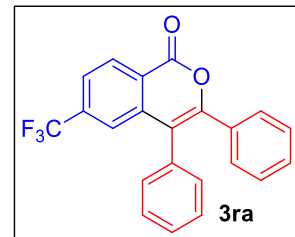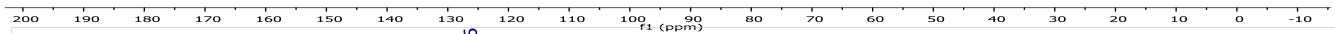

**<sup>19</sup>F NMR of 3ra (376 MHz, CDCl<sub>3</sub>)**

-63.36

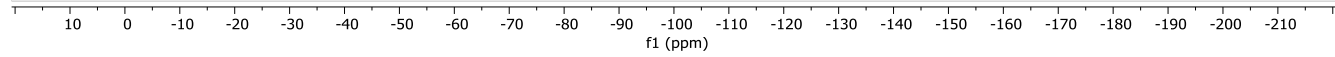

**<sup>1</sup>H NMR of 3sa (400 MHz, CDCl<sub>3</sub>)**

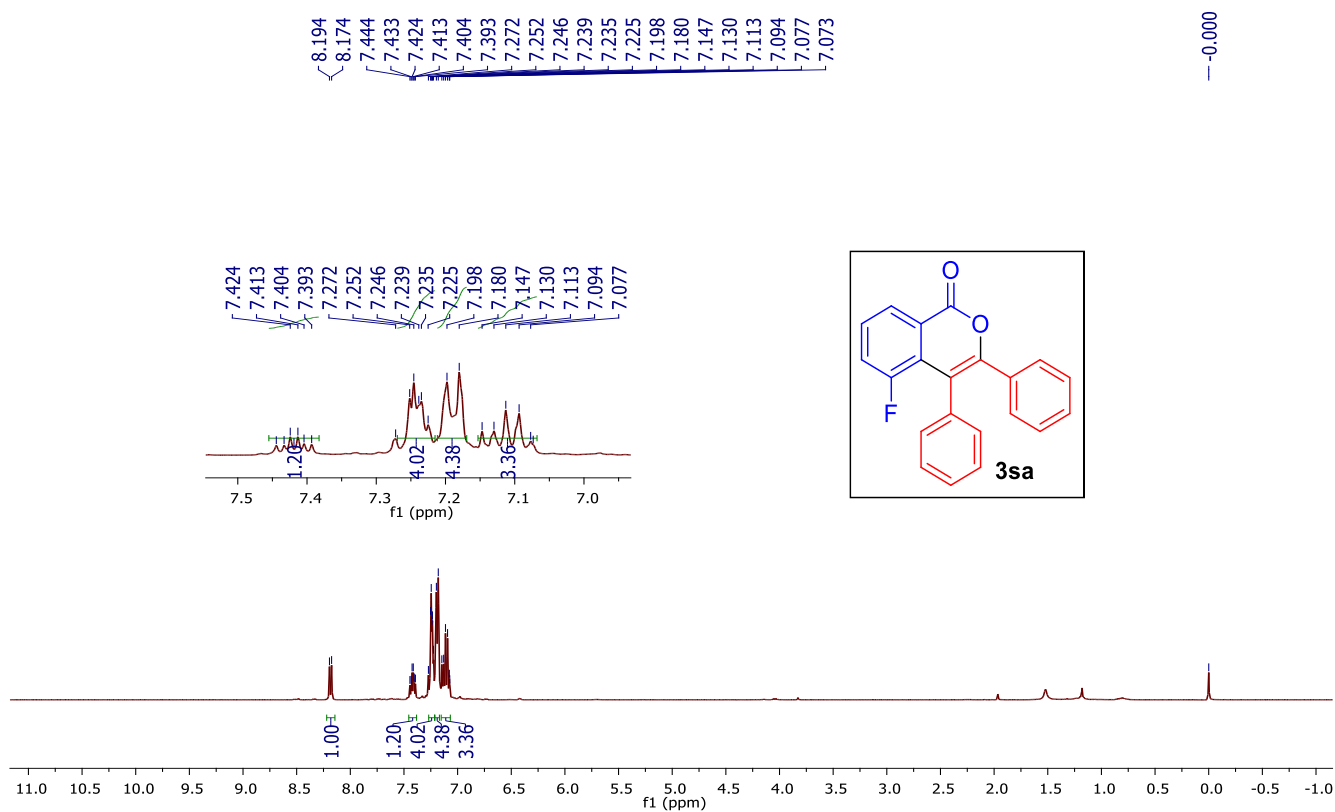

**<sup>13</sup>C{<sup>1</sup>H} NMR of 3sa (100 MHz, CDCl<sub>3</sub>)**

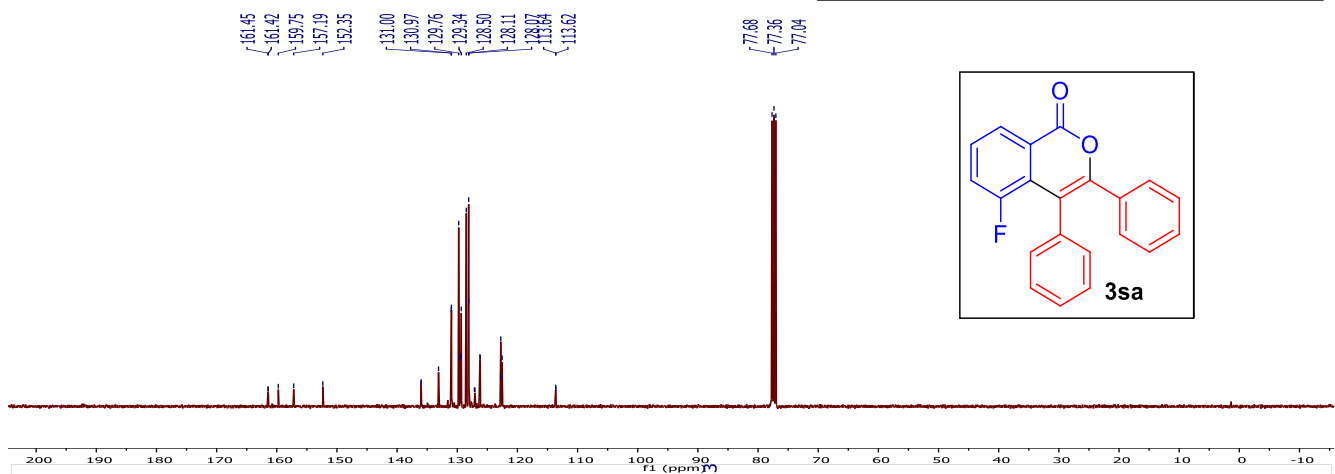

**<sup>19</sup>F NMR of 3sa (376 MHz, CDCl<sub>3</sub>)**

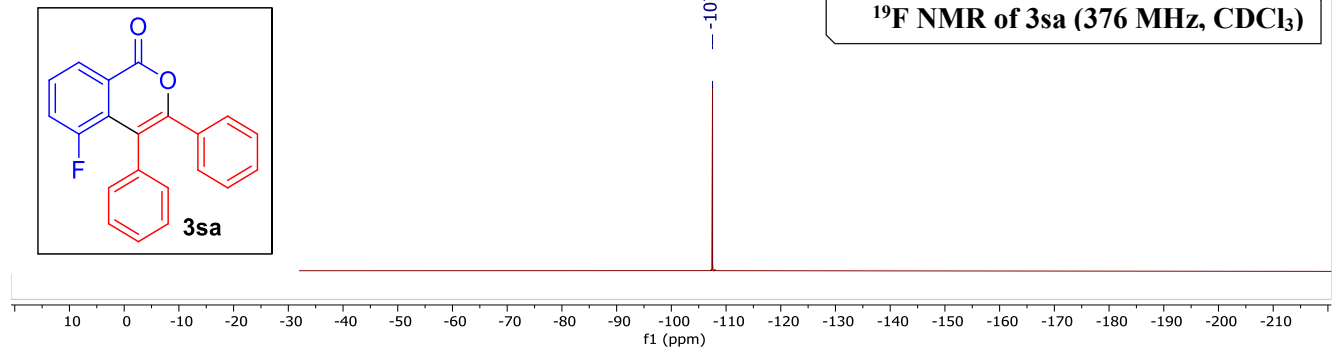

**<sup>1</sup>H NMR of 3ta (400 MHz, CDCl<sub>3</sub>)**

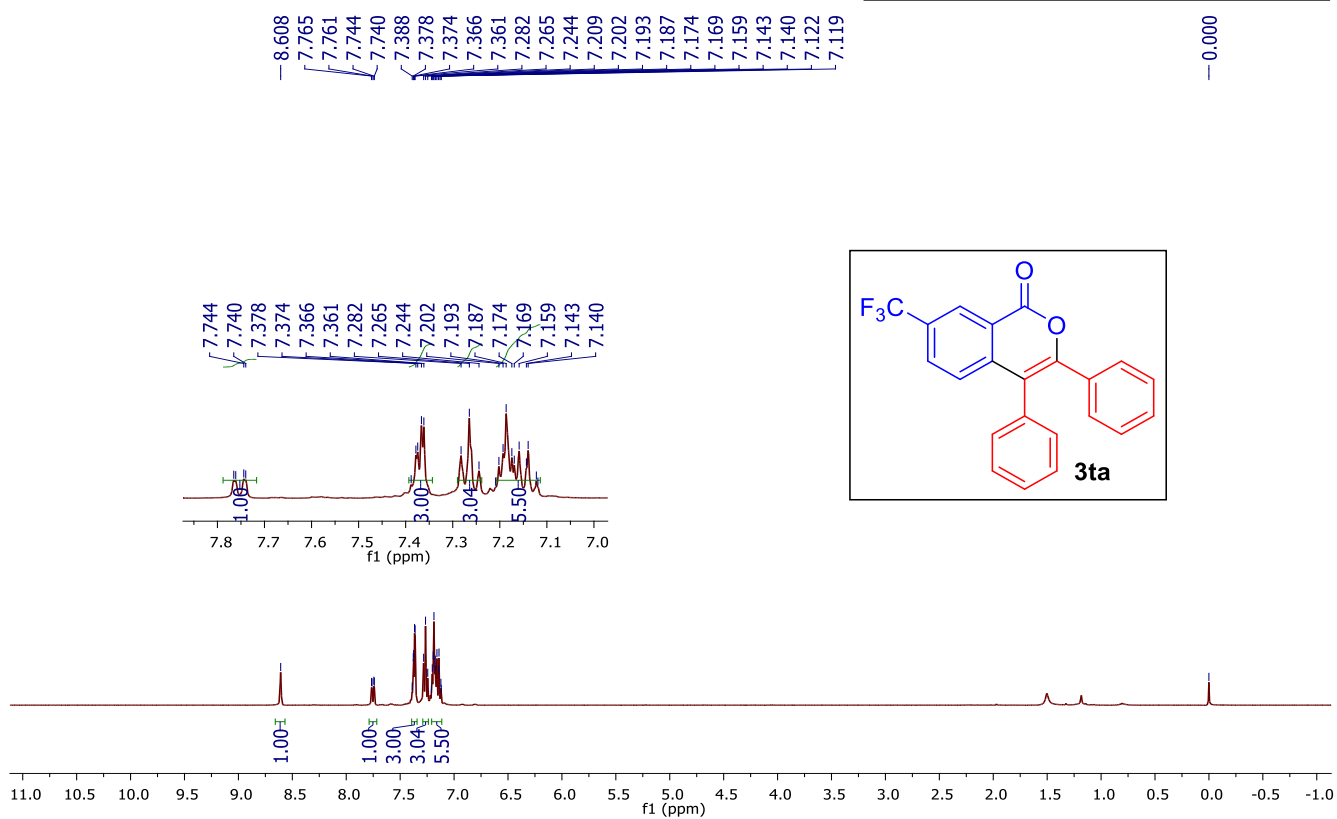

**<sup>13</sup>C{<sup>1</sup>H} NMR of 3ta (100 MHz, CDCl<sub>3</sub>)**

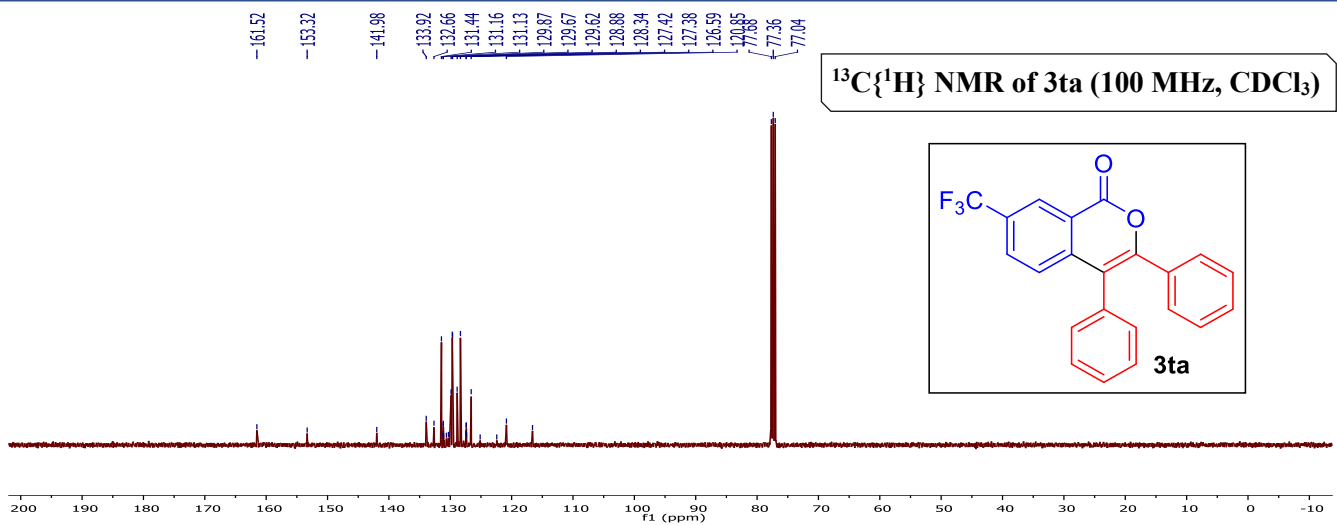

**<sup>19</sup>F NMR of 3ta (376 MHz, CDCl<sub>3</sub>)**

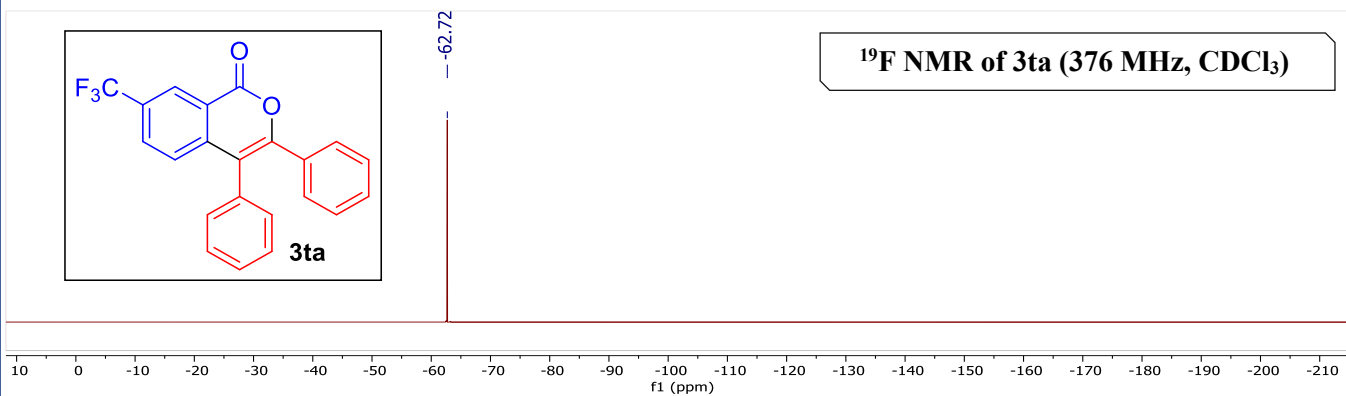

**<sup>1</sup>H NMR of 3ua (400 MHz, CDCl<sub>3</sub>)**

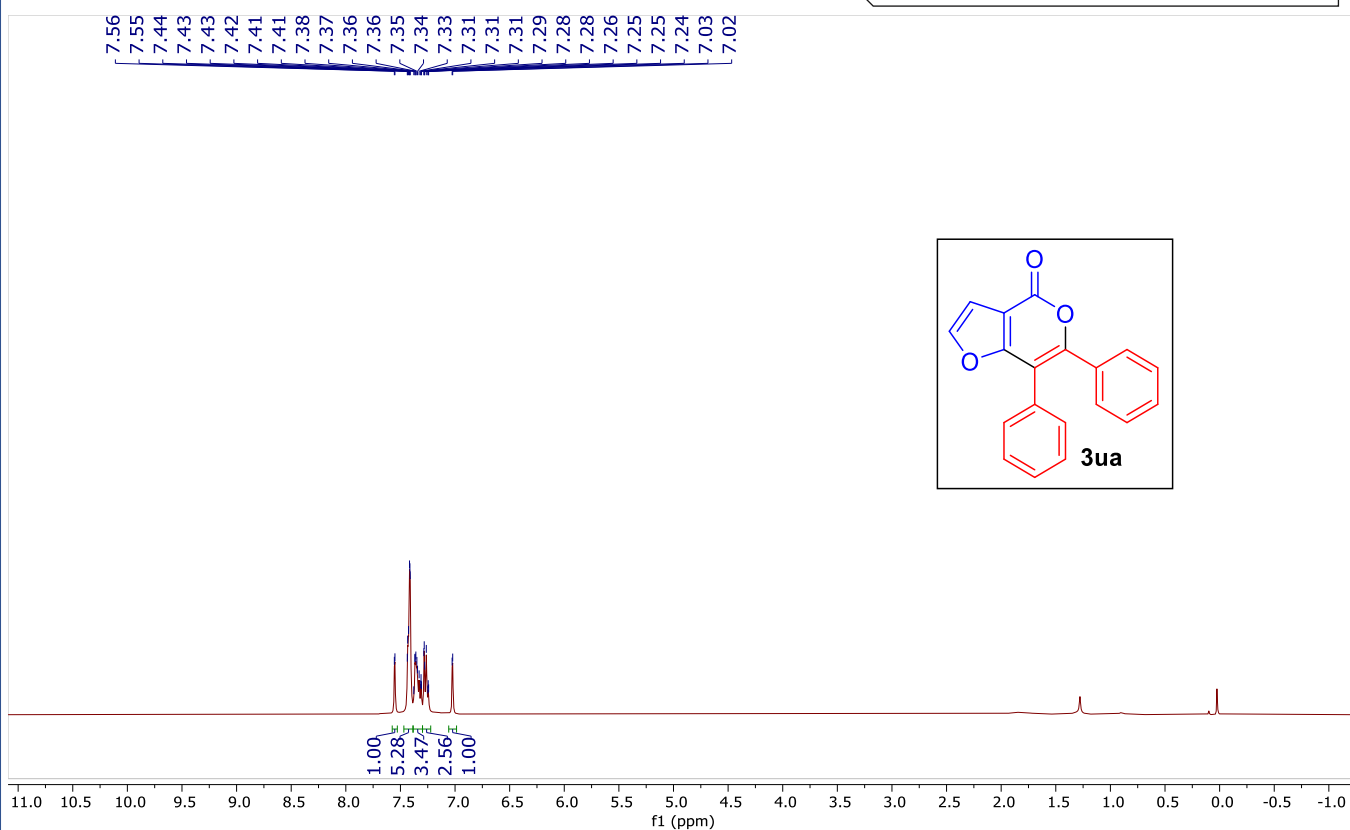

**<sup>13</sup>C{<sup>1</sup>H} NMR of 3ua (100 MHz, CDCl<sub>3</sub>)**

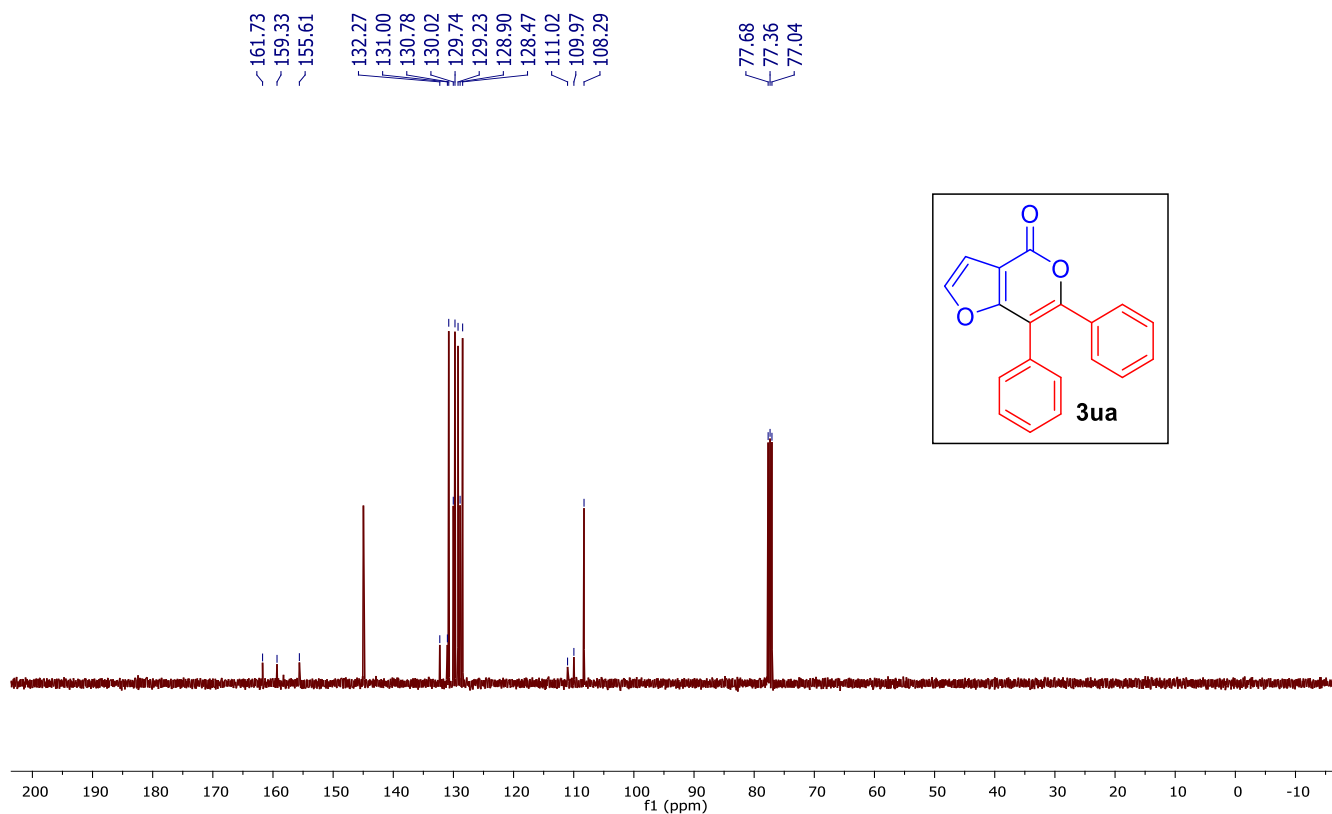

**<sup>1</sup>H NMR of 3va (700 MHz, CDCl<sub>3</sub>)**

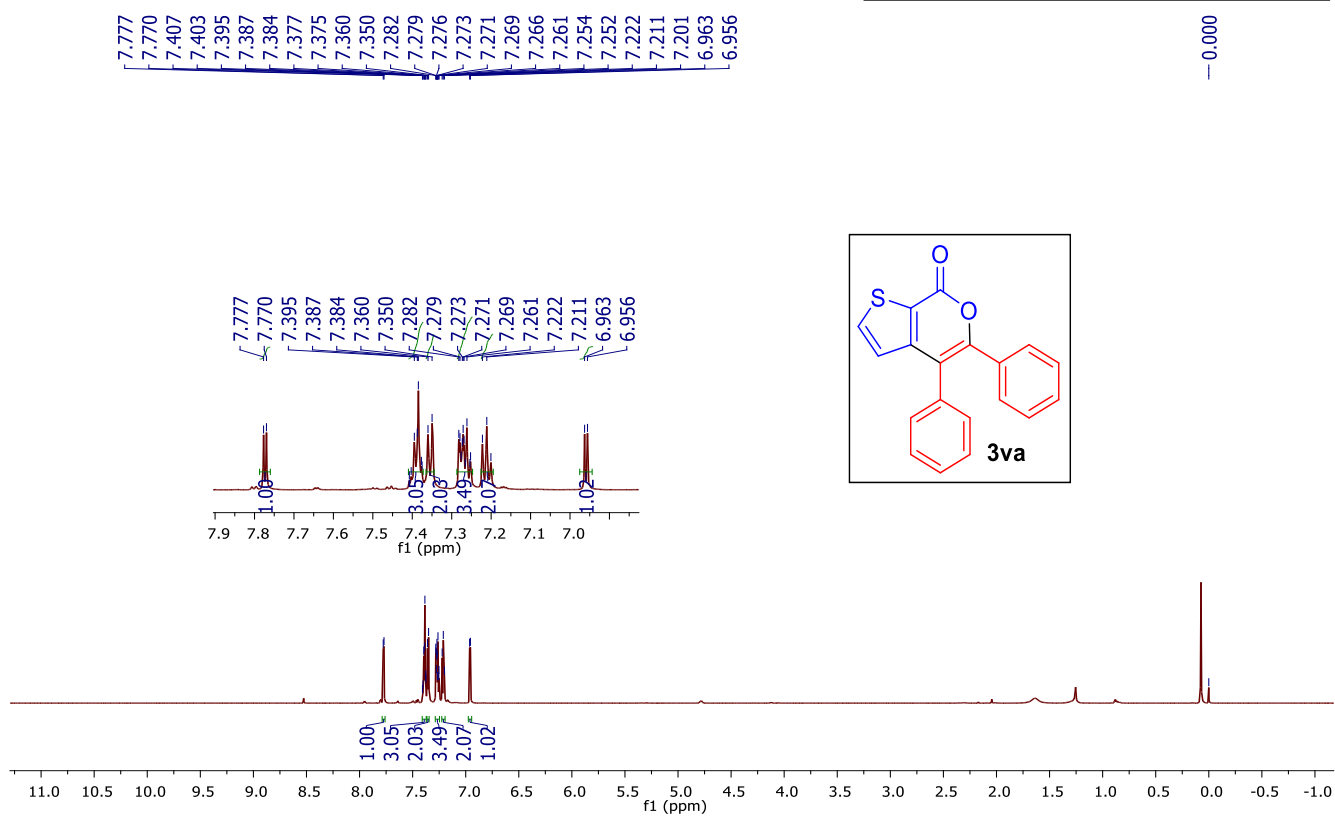

**<sup>13</sup>C{<sup>1</sup>H} NMR of 3va (176 MHz, CDCl<sub>3</sub>)**

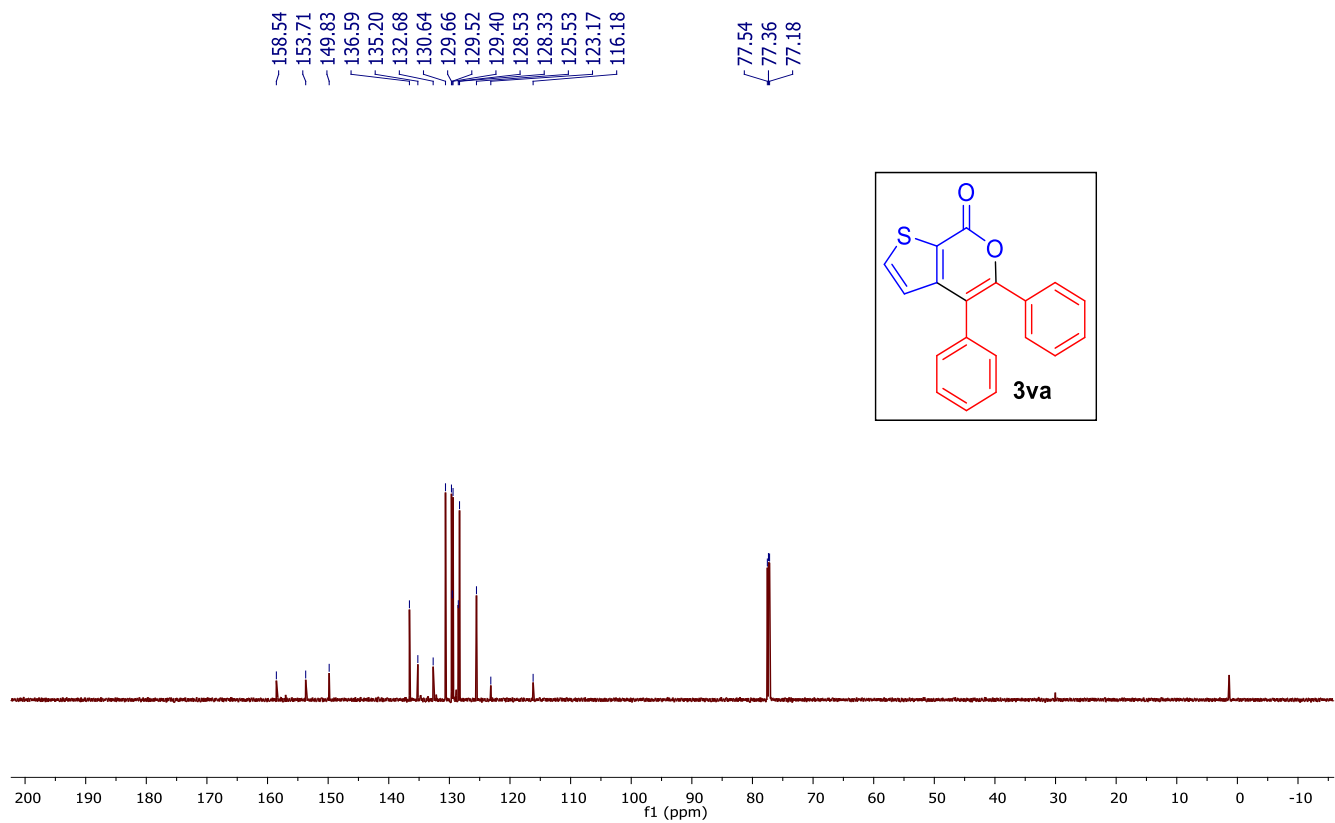

**<sup>1</sup>H NMR of 3ab (400 MHz, CDCl<sub>3</sub>)**

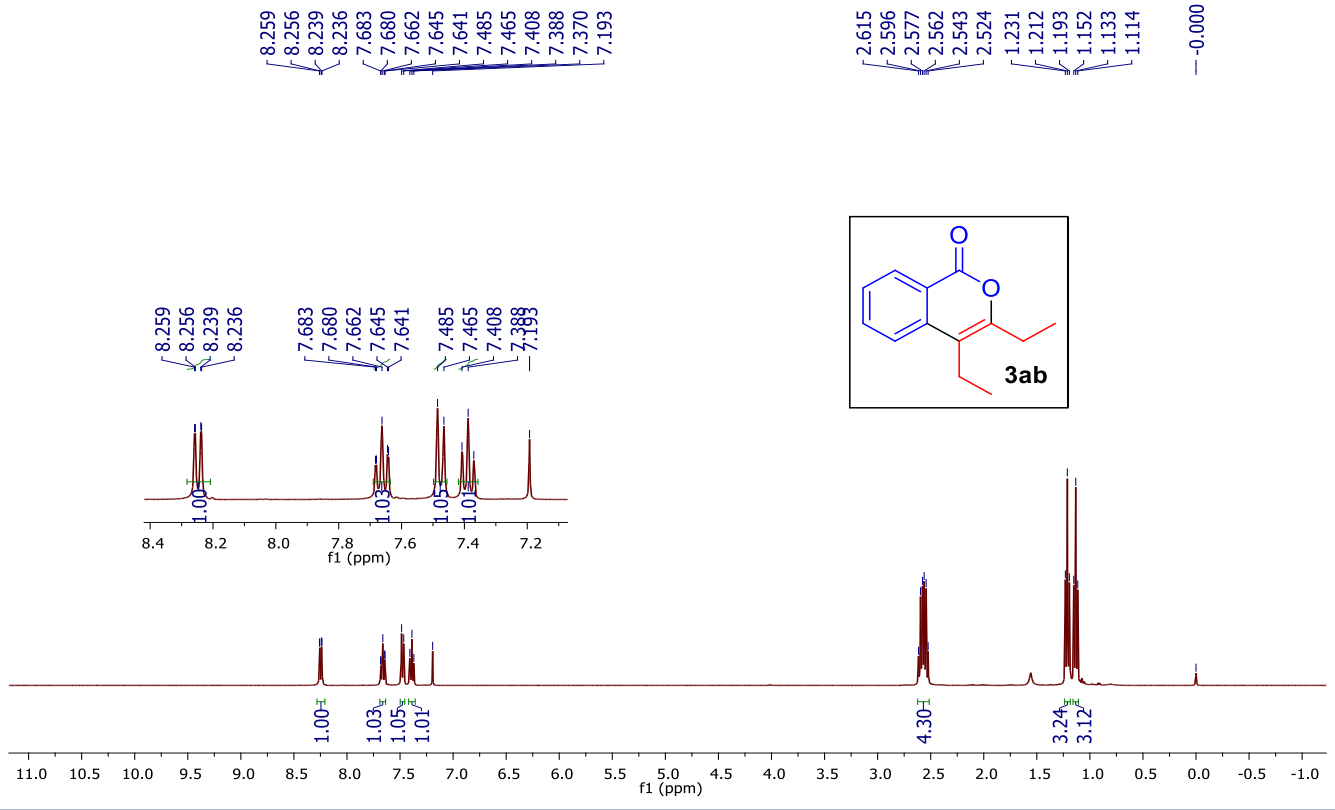

**<sup>13</sup>C{<sup>1</sup>H} NMR of 3ab (100 MHz, CDCl<sub>3</sub>)**

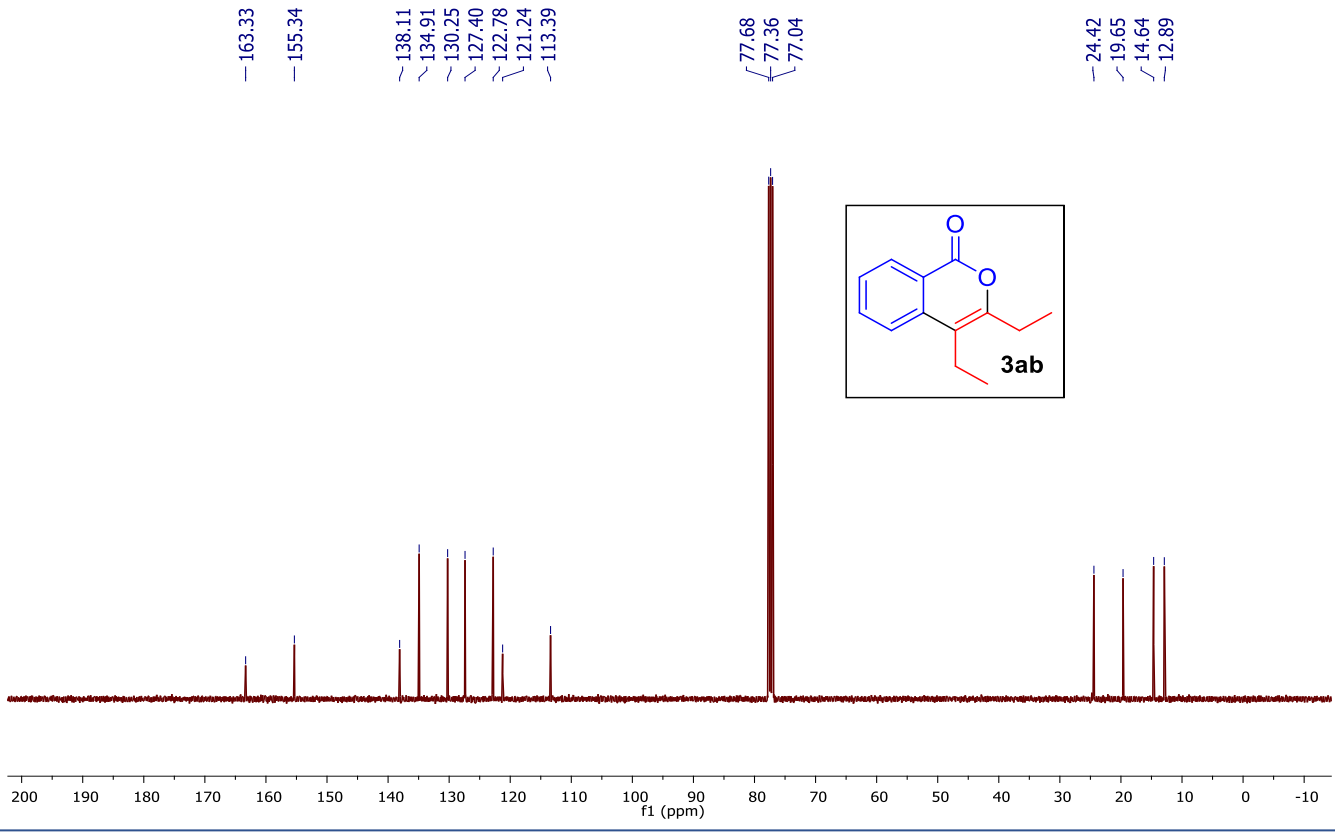

**<sup>1</sup>H NMR of 3ac (400 MHz, CDCl<sub>3</sub>)**

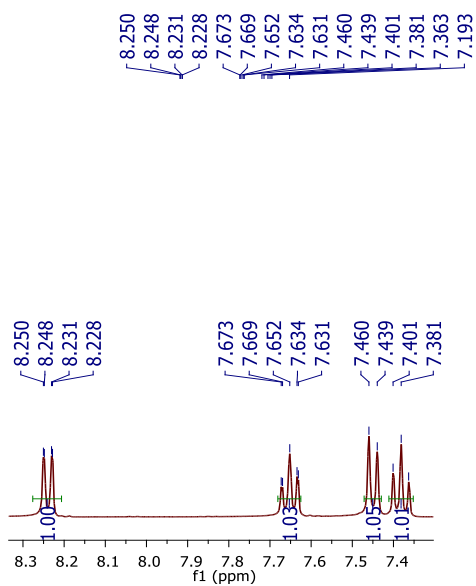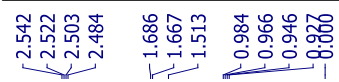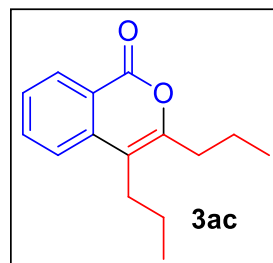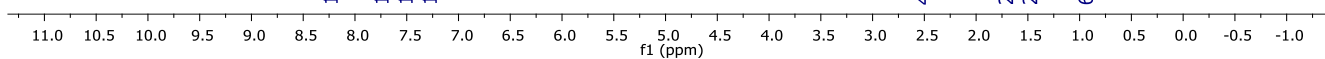

**<sup>13</sup>C{<sup>1</sup>H} NMR of 3ac (100 MHz, CDCl<sub>3</sub>)**

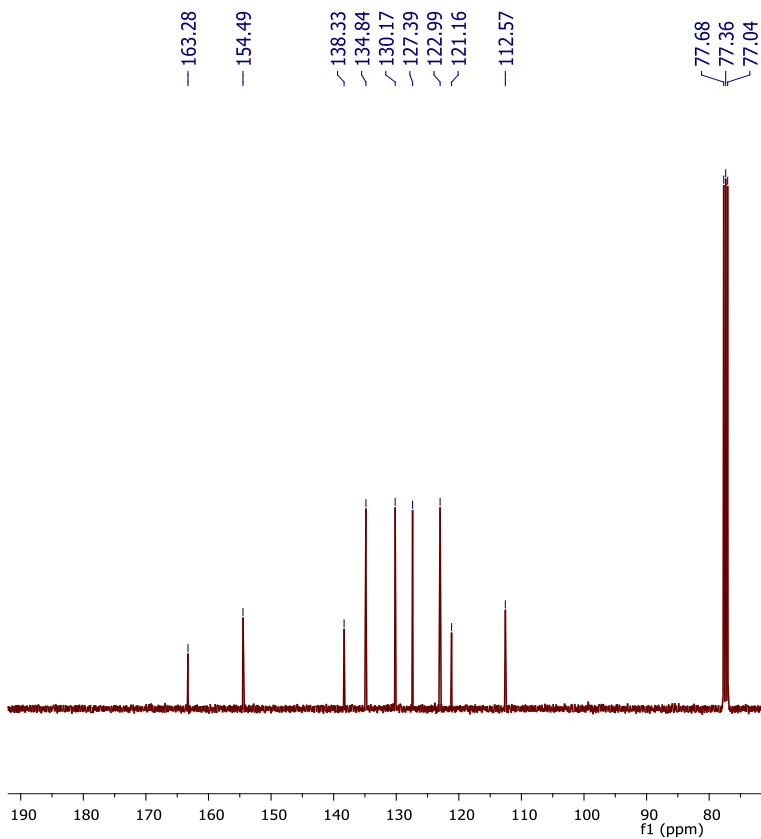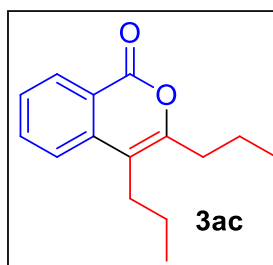

**<sup>1</sup>H NMR of 3ad (400 MHz, CDCl<sub>3</sub>)**

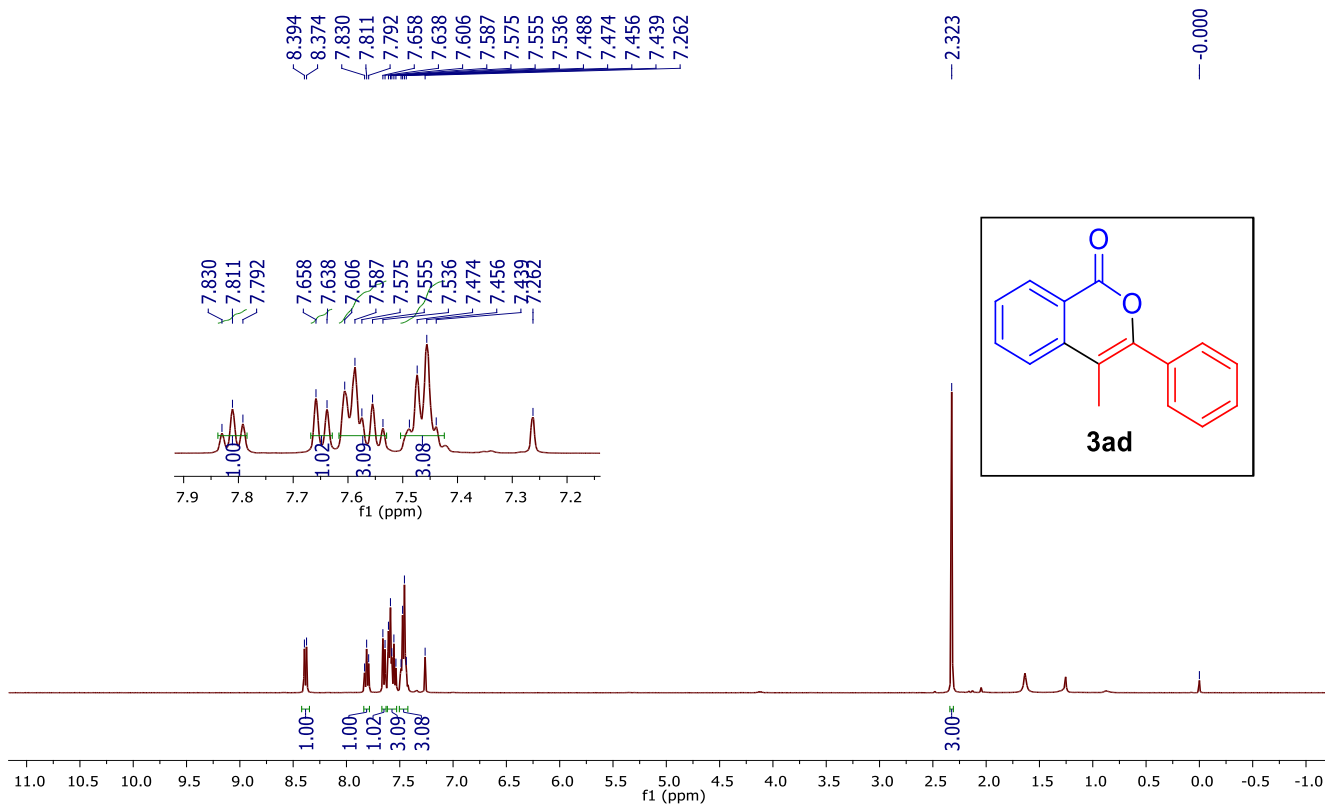

**<sup>13</sup>C{<sup>1</sup>H} NMR of 3ad (100 MHz, CDCl<sub>3</sub>)**

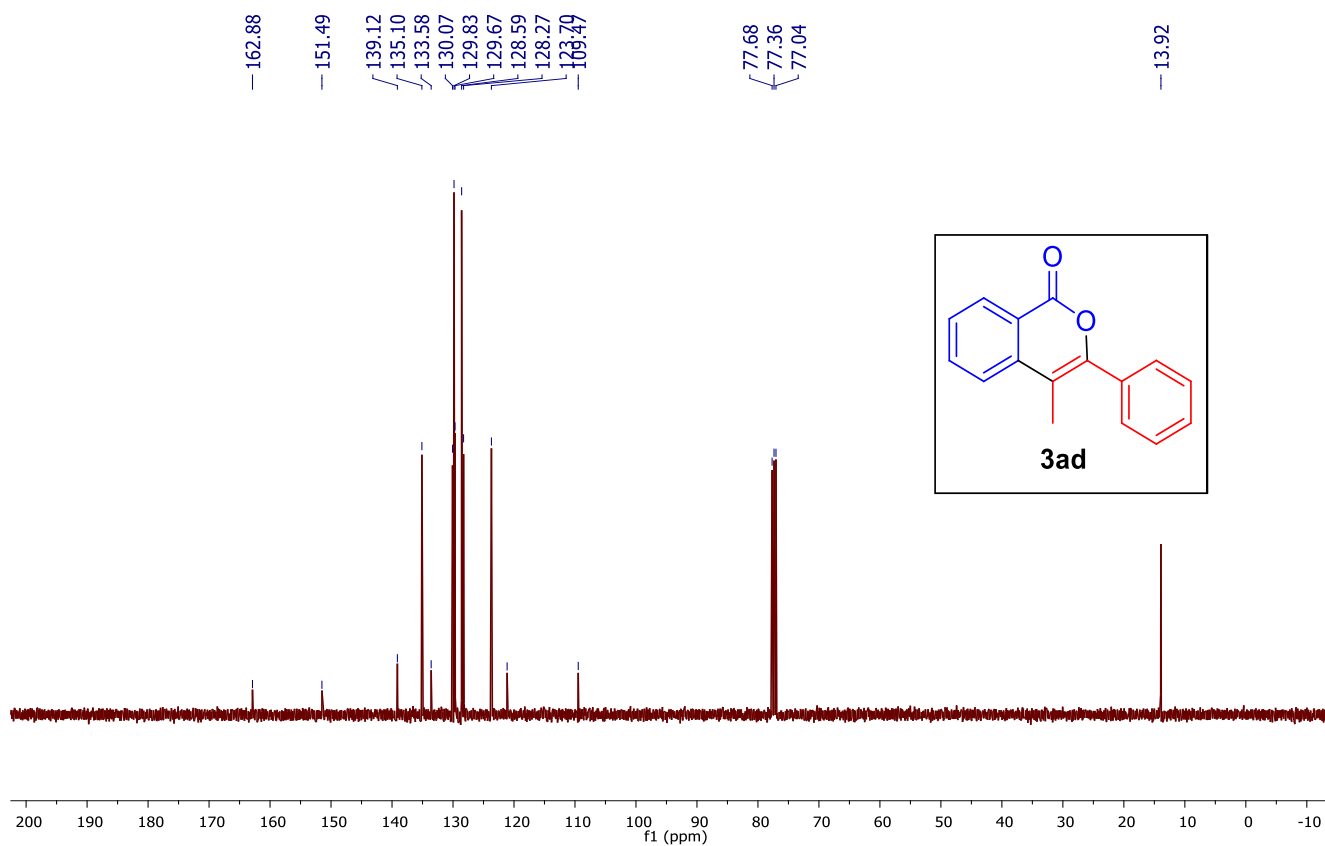

**<sup>1</sup>H NMR of 3ae (400 MHz, CDCl<sub>3</sub>)**

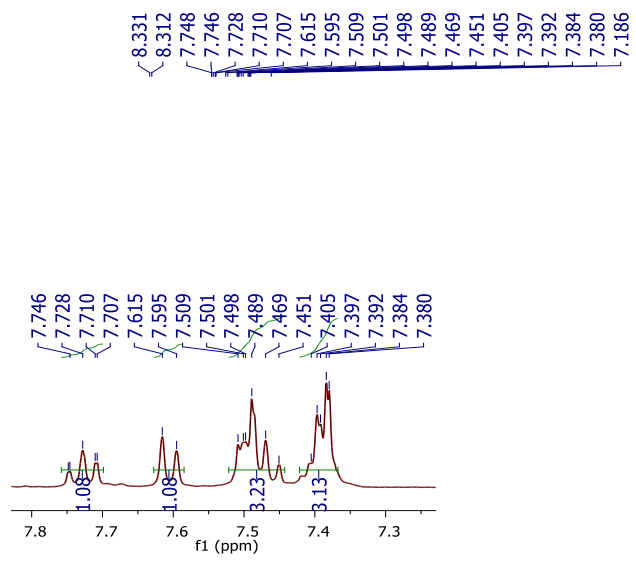

2.680  
2.662  
2.643  
2.625

1.233  
1.214  
1.196

-0.000

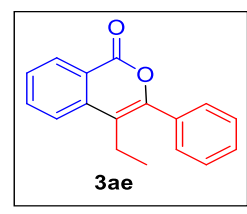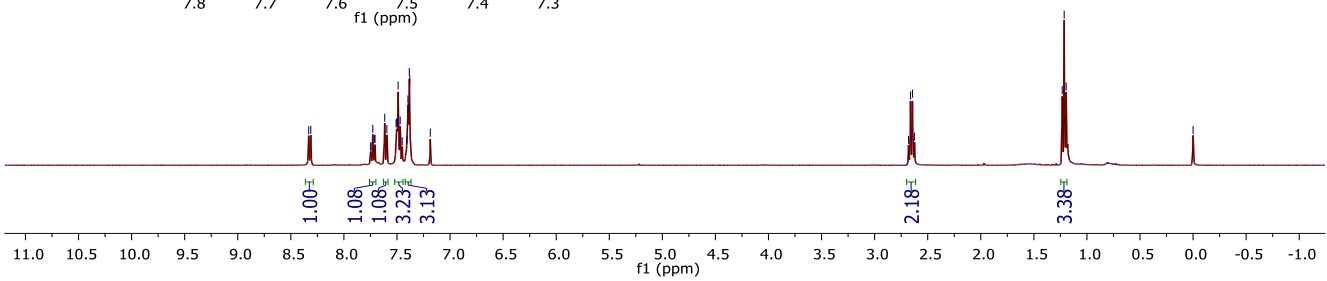

**<sup>13</sup>C{<sup>1</sup>H} NMR of 3ae (100 MHz, CDCl<sub>3</sub>)**

162.80

151.67

138.02

135.03

133.79

130.37

129.73

129.29

128.68

128.18

123.75

121.68

115.57

77.68

77.36

77.04

20.45

15.07

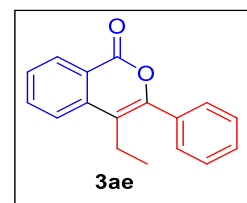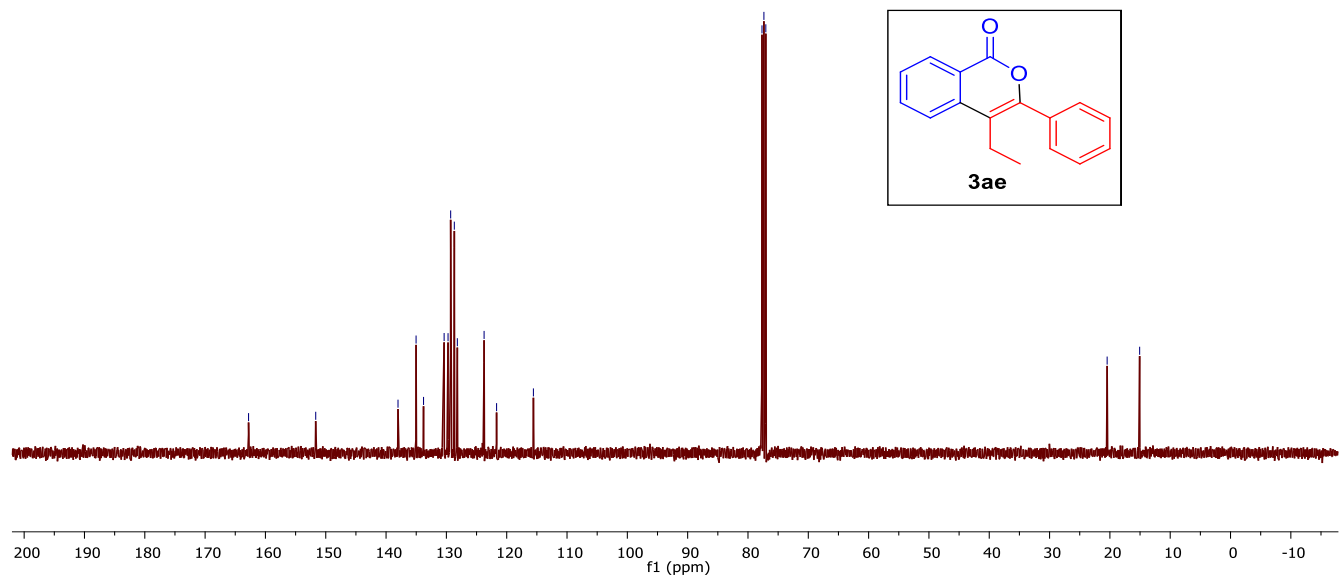

**<sup>1</sup>H NMR of 3ag (400 MHz, CDCl<sub>3</sub>)**

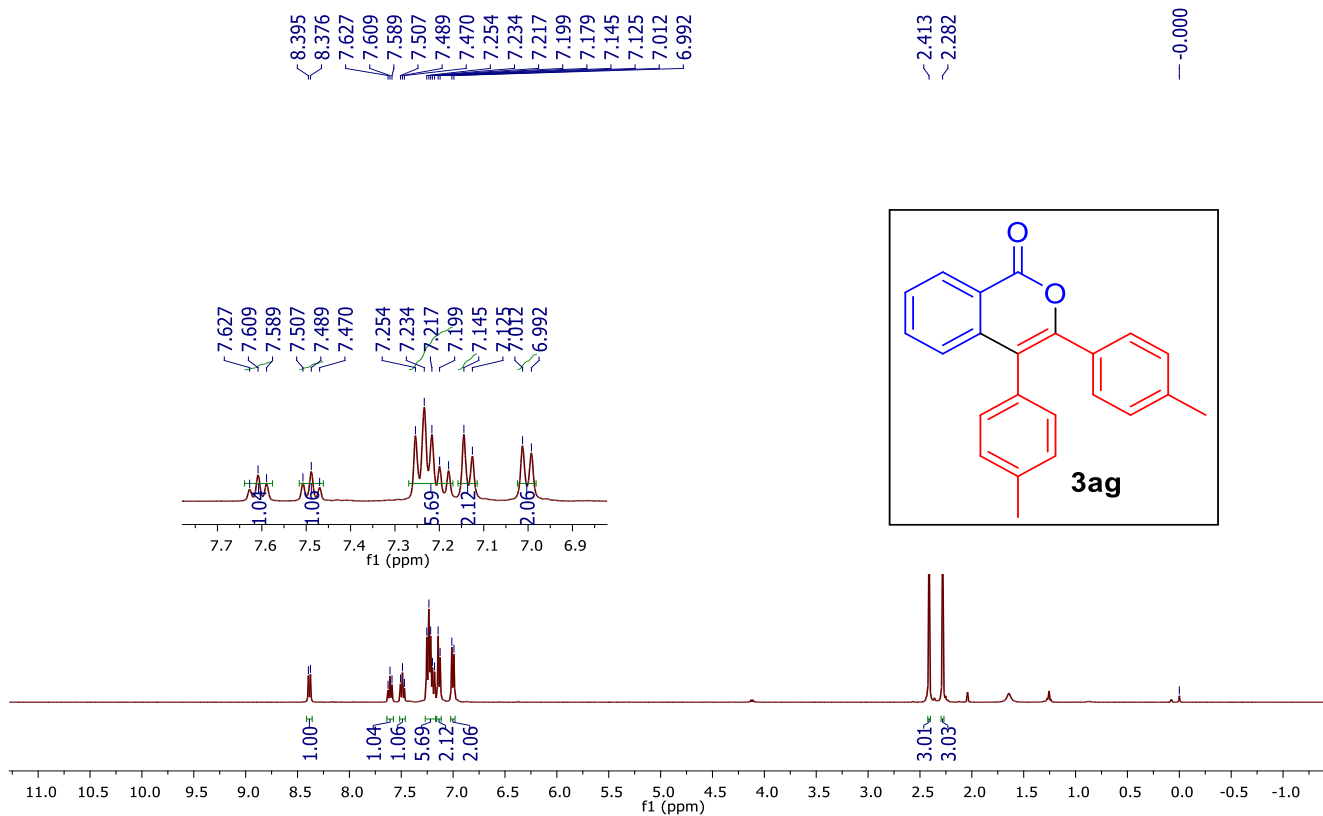

**<sup>13</sup>C{<sup>1</sup>H} NMR of 3ag (176 MHz, CDCl<sub>3</sub>)**

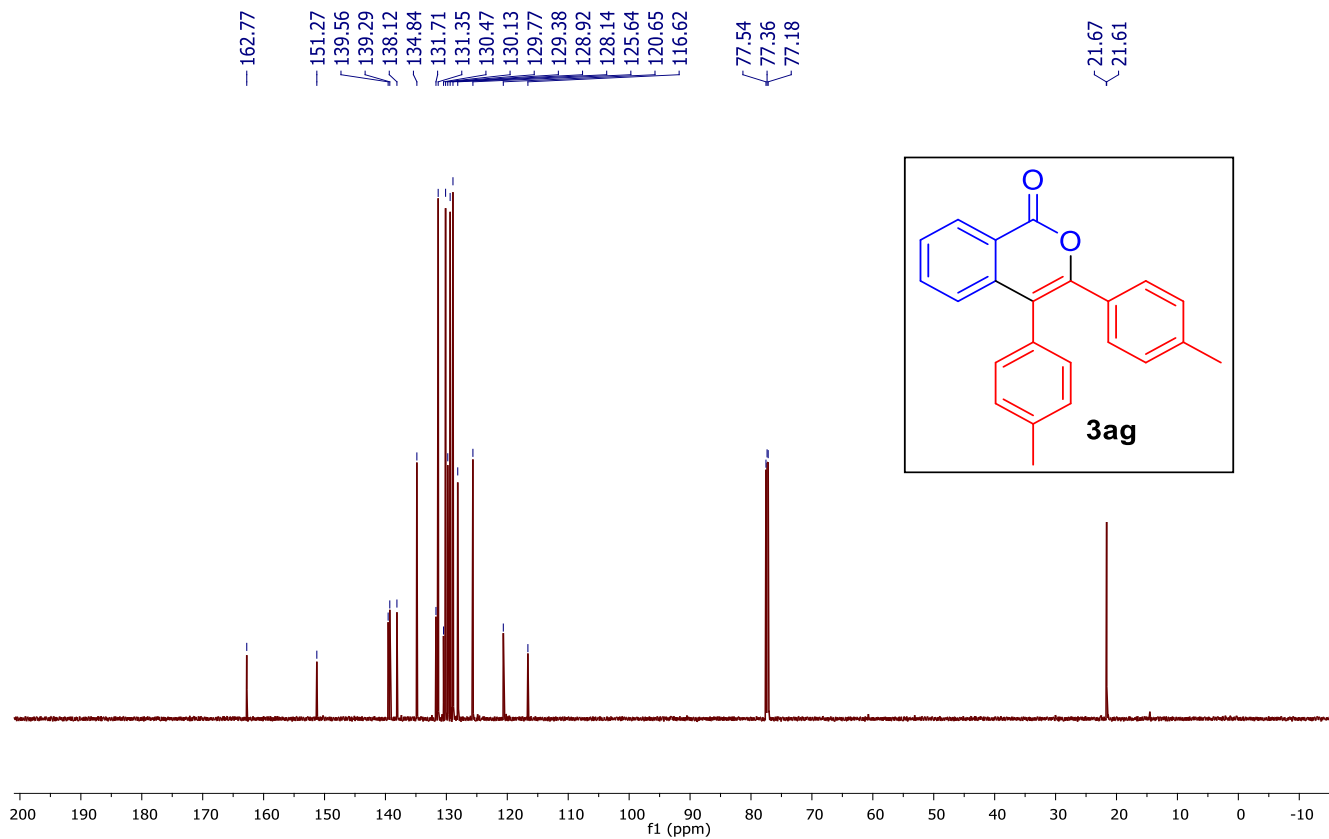

**<sup>1</sup>H NMR of 3ai (400 MHz, CDCl<sub>3</sub>)**

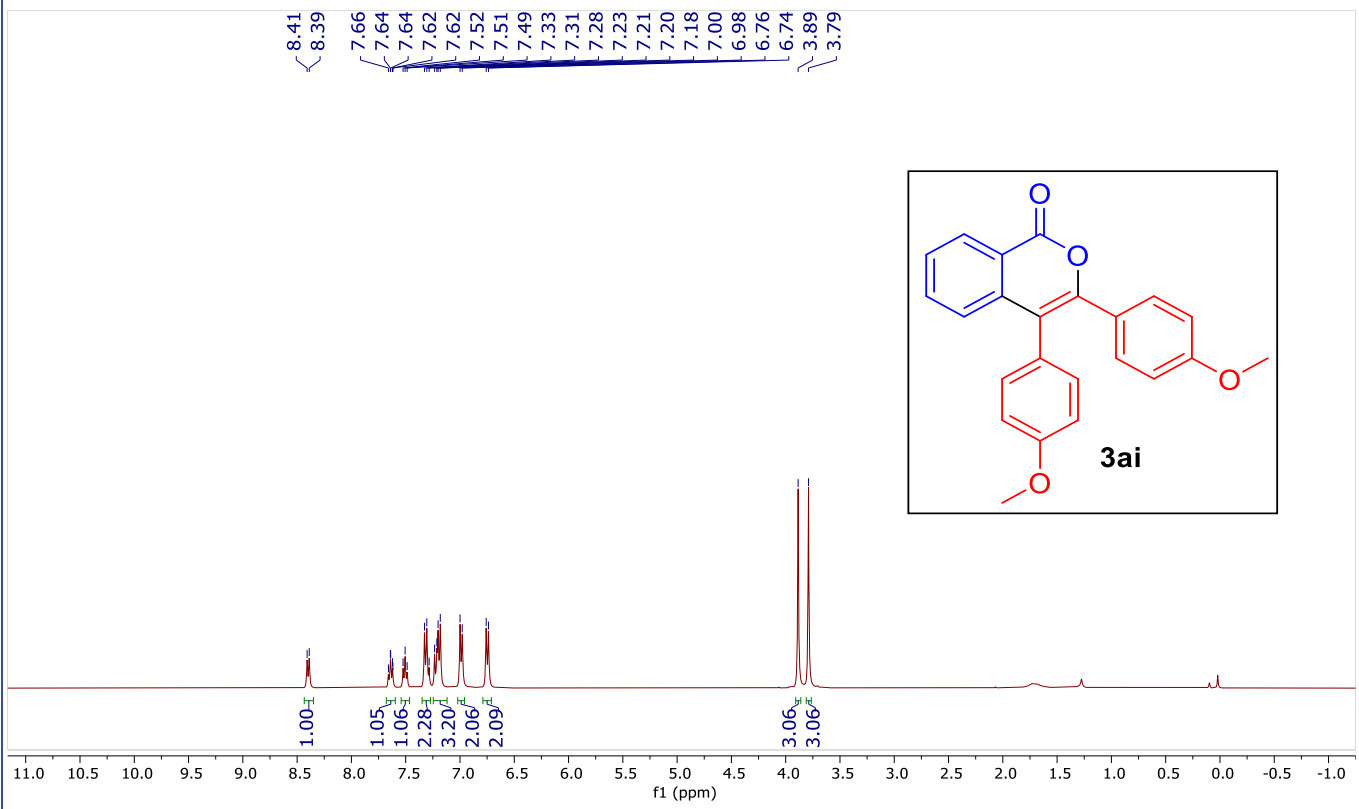

**<sup>13</sup>C{<sup>1</sup>H} NMR of 3ai (176 MHz, CDCl<sub>3</sub>)**

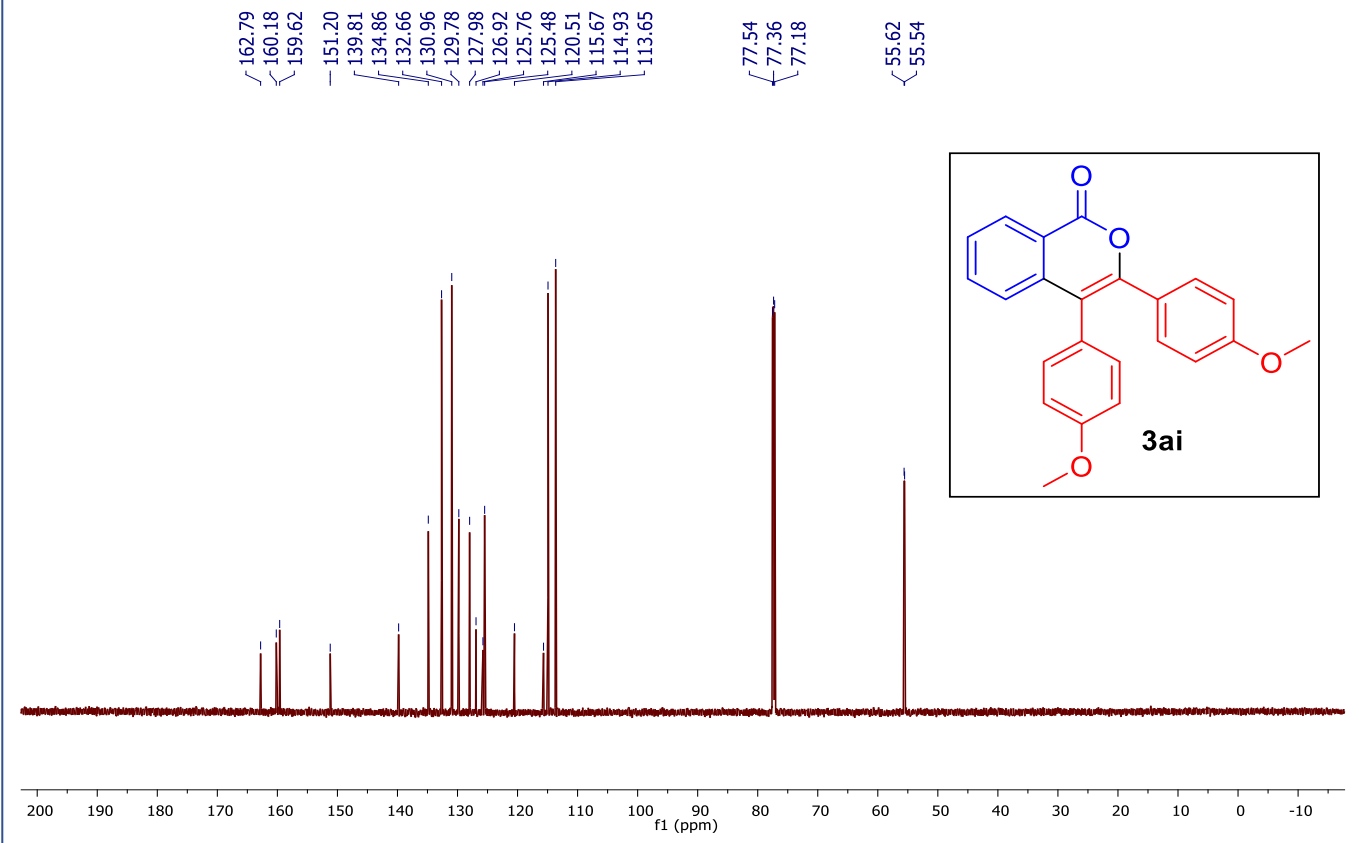

**<sup>1</sup>H NMR of 3aj (400 MHz, CDCl<sub>3</sub>)**

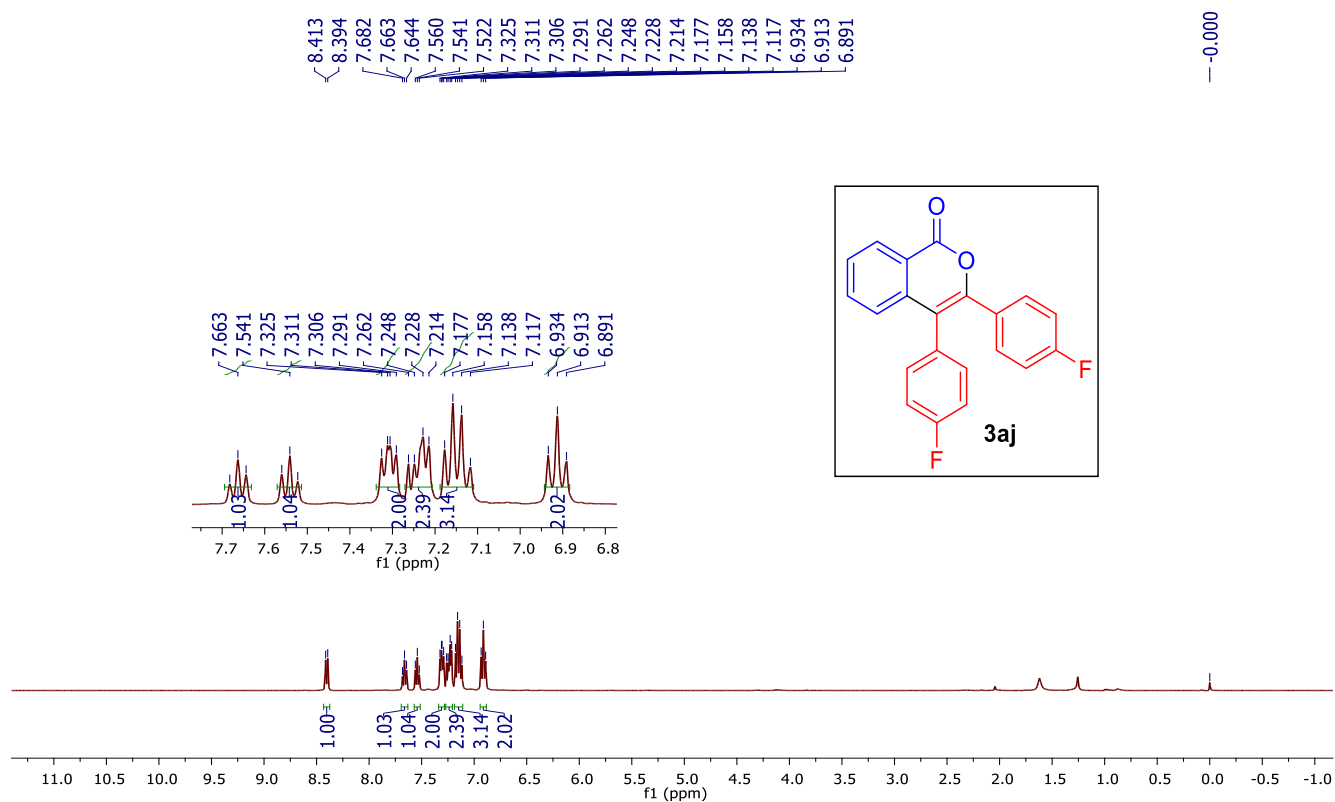

**<sup>13</sup>C{<sup>1</sup>H} NMR of 3aj (100 MHz, CDCl<sub>3</sub>)**

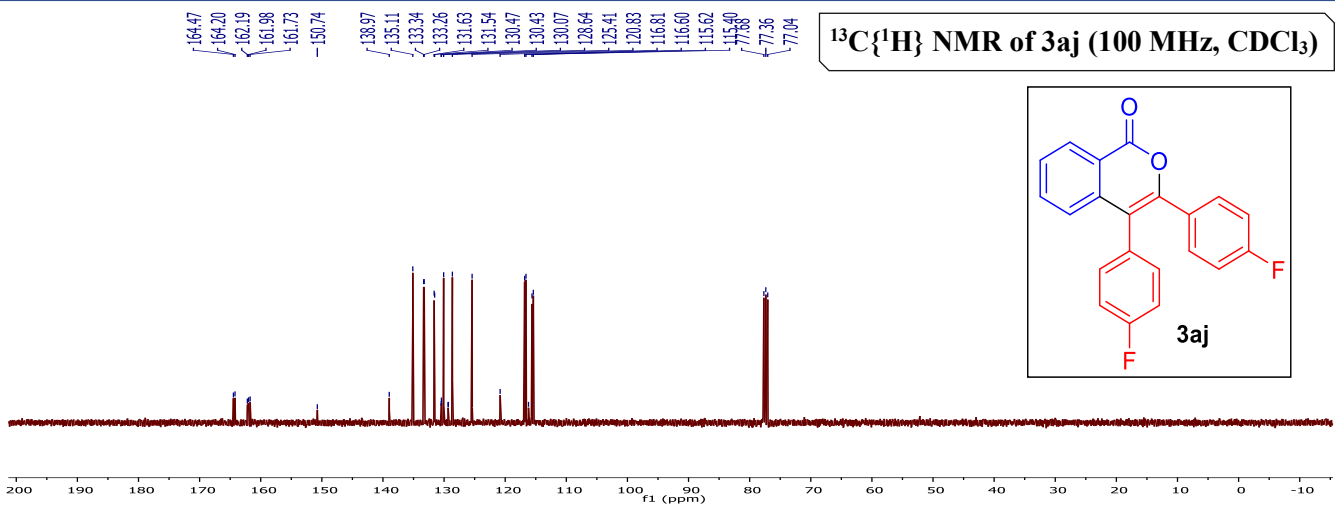

**<sup>19</sup>F NMR of 3aj (376 MHz, CDCl<sub>3</sub>)**

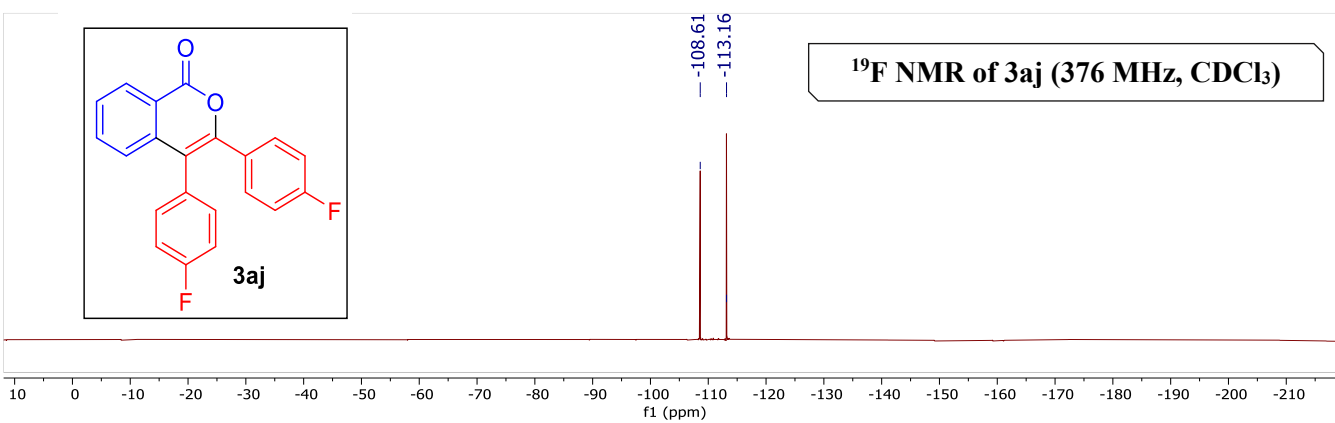

**<sup>1</sup>H NMR of 3ak (700 MHz, CDCl<sub>3</sub>)**

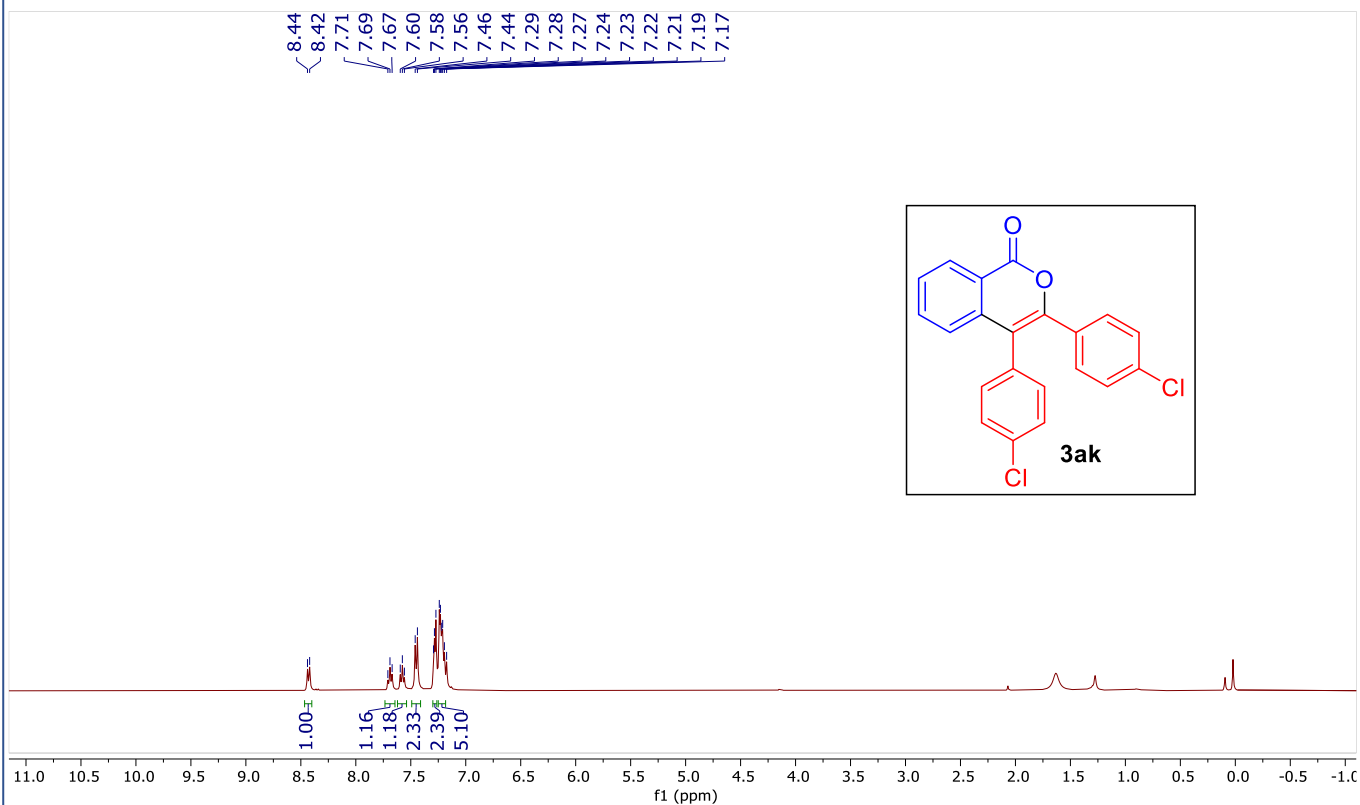

**<sup>13</sup>C{<sup>1</sup>H} NMR of 3ak (176 MHz, CDCl<sub>3</sub>)**

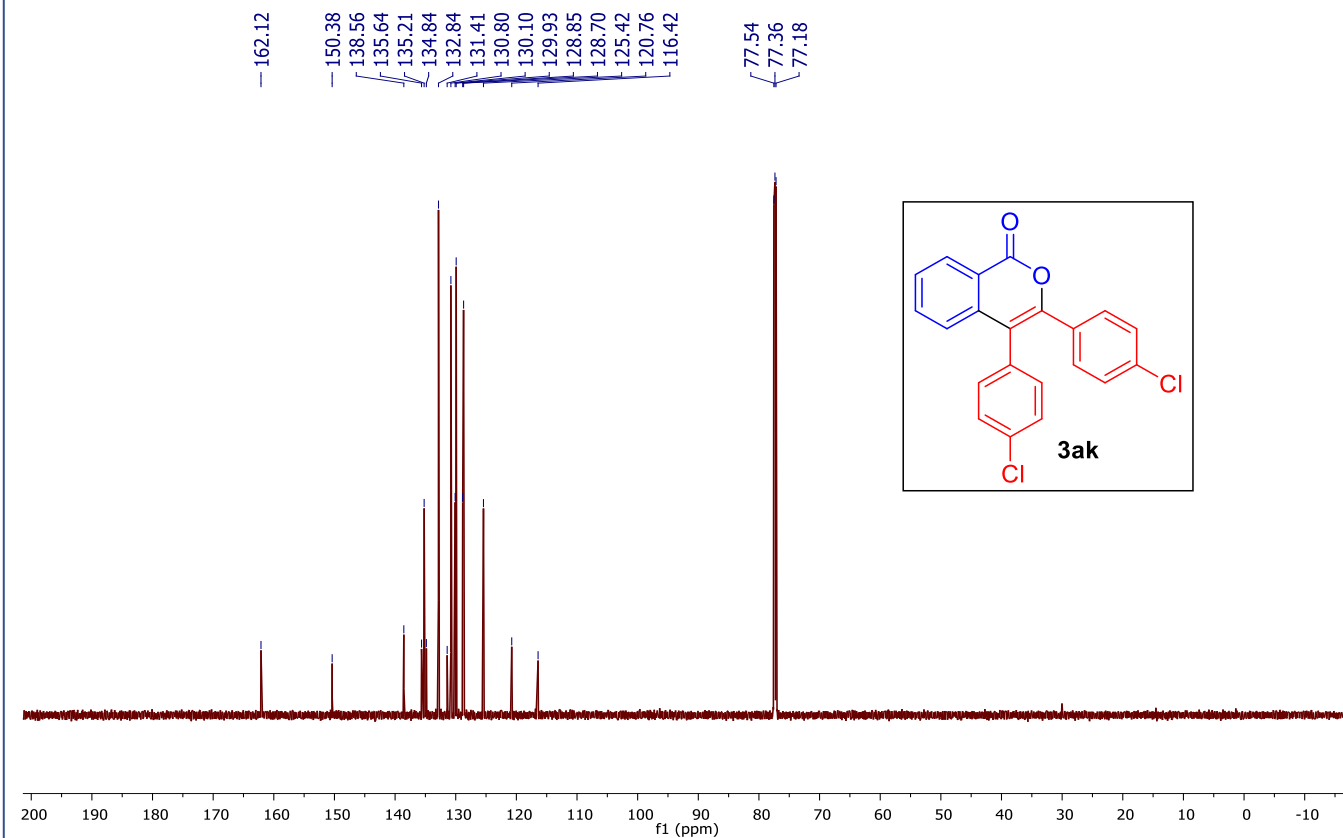

**<sup>1</sup>H NMR of 7 (400 MHz, CDCl<sub>3</sub>)**

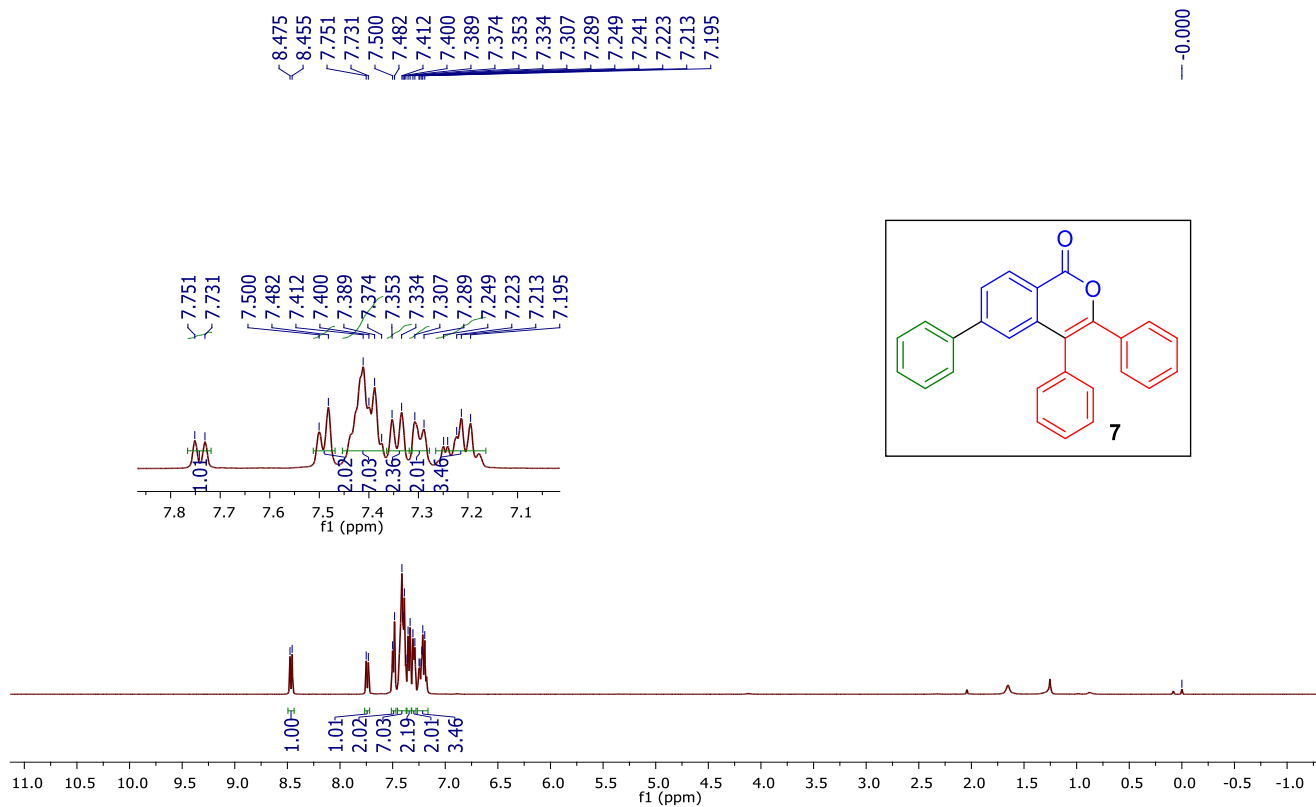

**<sup>13</sup>C{<sup>1</sup>H} NMR of 7 (100 MHz, CDCl<sub>3</sub>)**

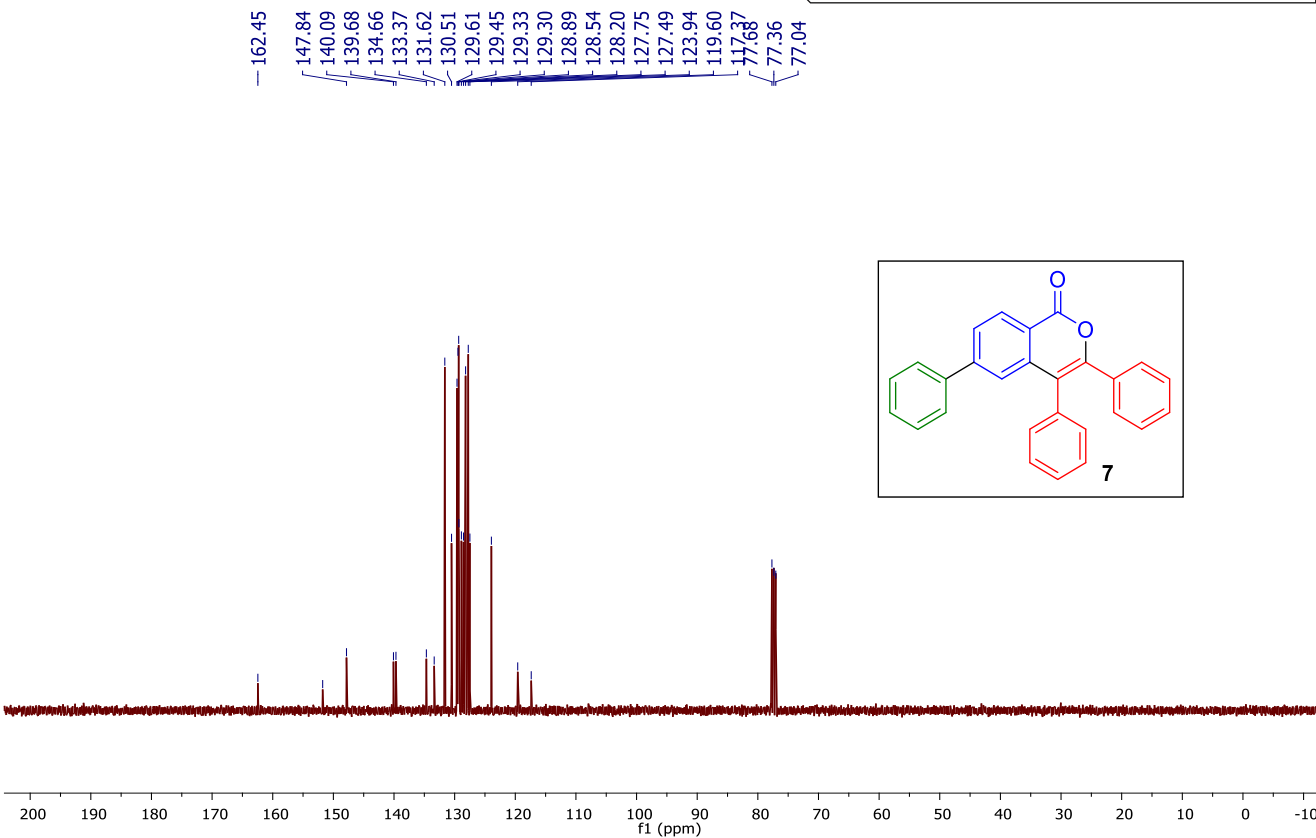

**<sup>1</sup>H NMR of 9 (400 MHz, CDCl<sub>3</sub>)**

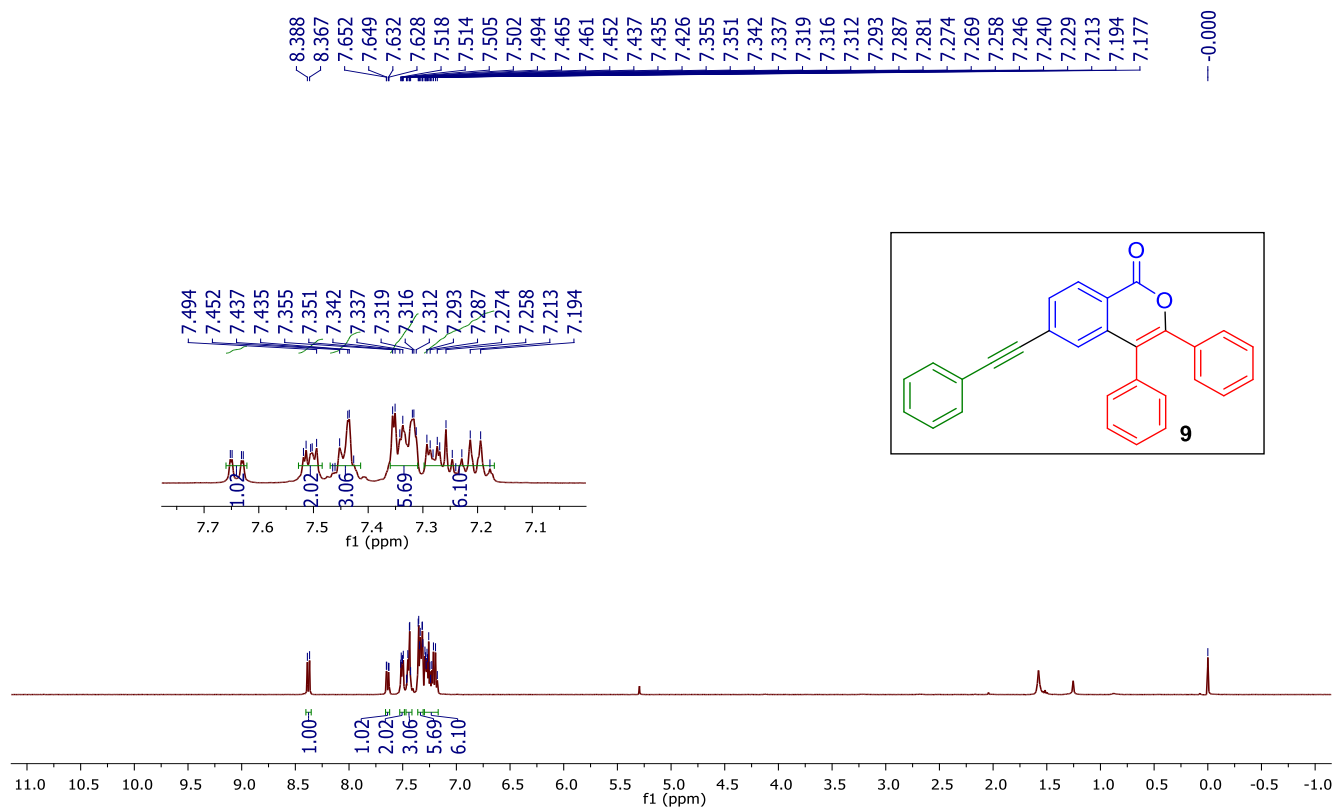

**<sup>13</sup>C{<sup>1</sup>H} NMR of 9 (100 MHz, CDCl<sub>3</sub>)**

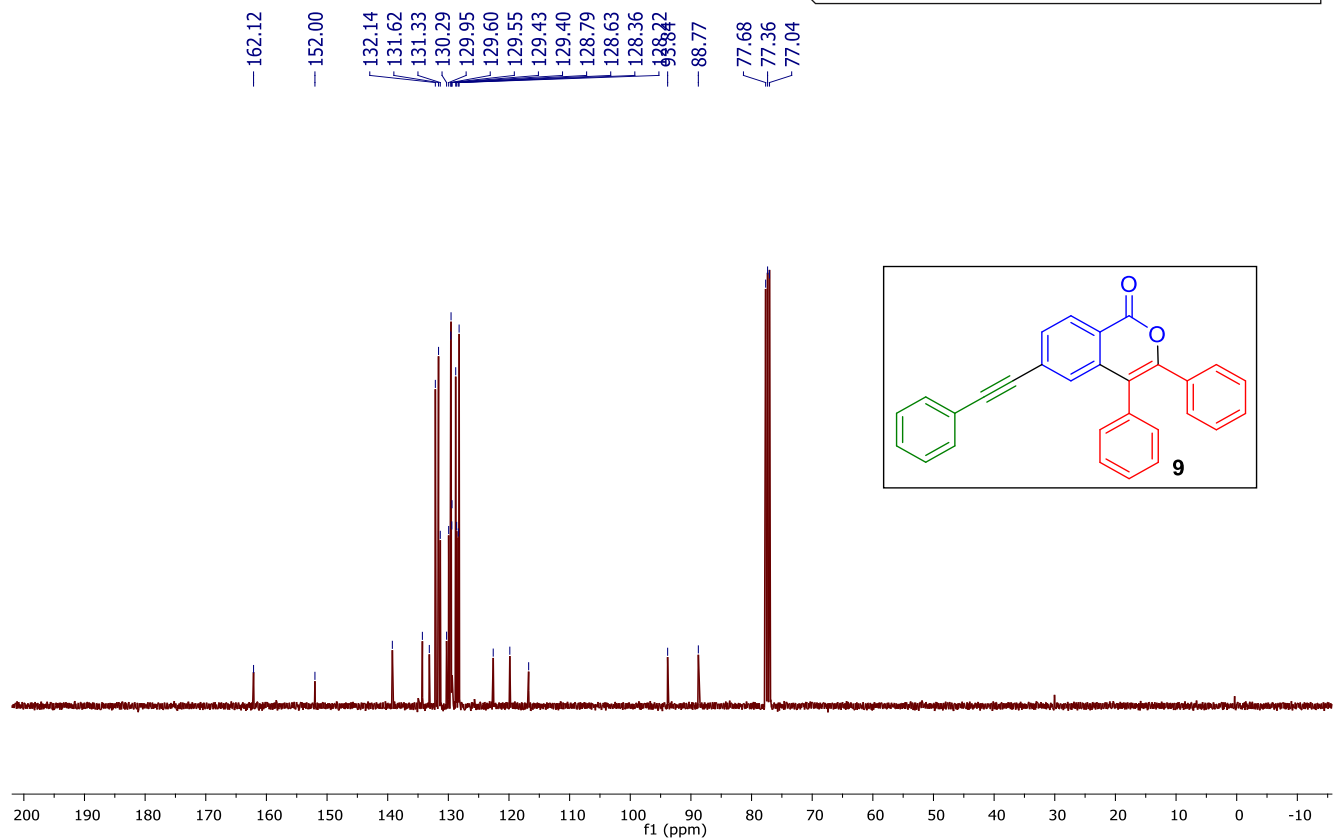

**<sup>1</sup>H NMR of 11 (400 MHz, CDCl<sub>3</sub>)**

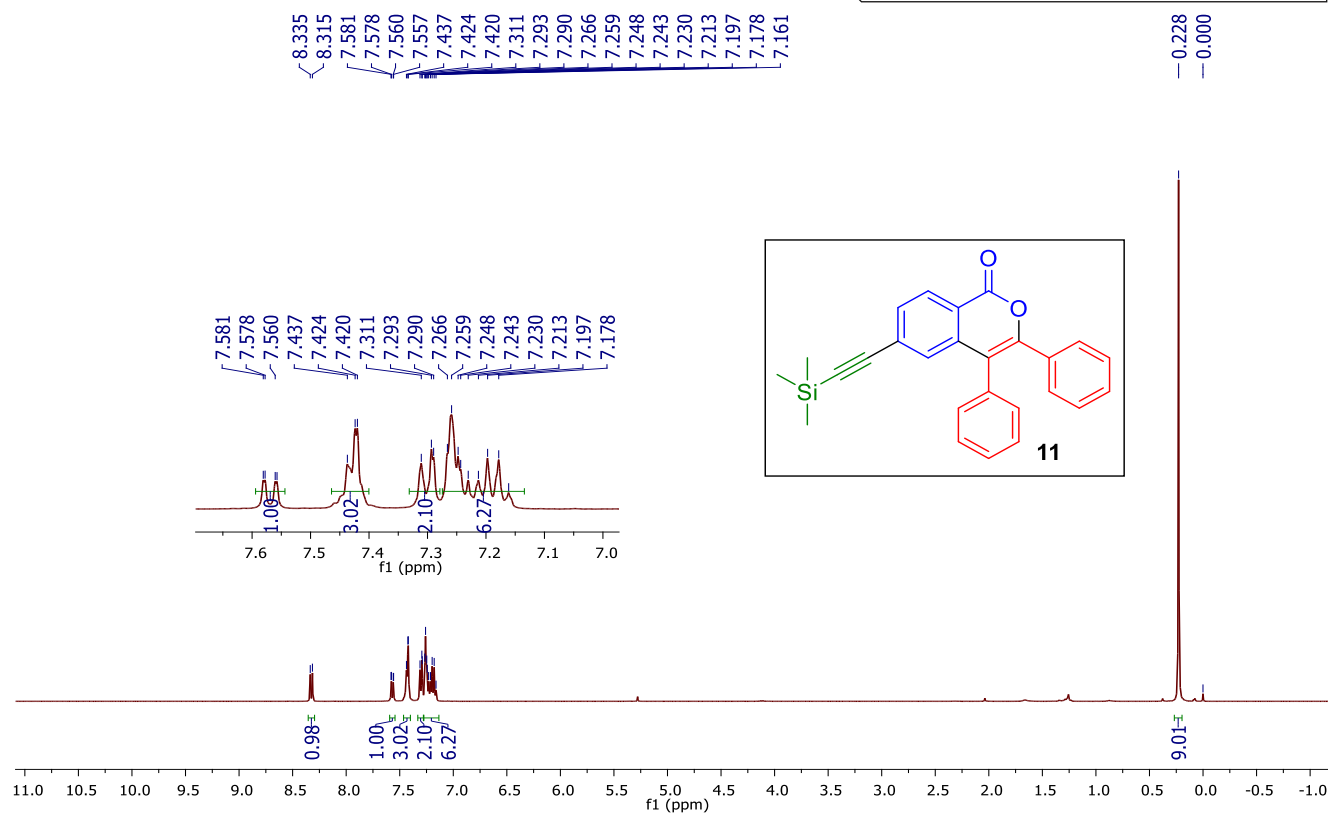

**<sup>13</sup>C{<sup>1</sup>H} NMR of 11 (100 MHz, CDCl<sub>3</sub>)**

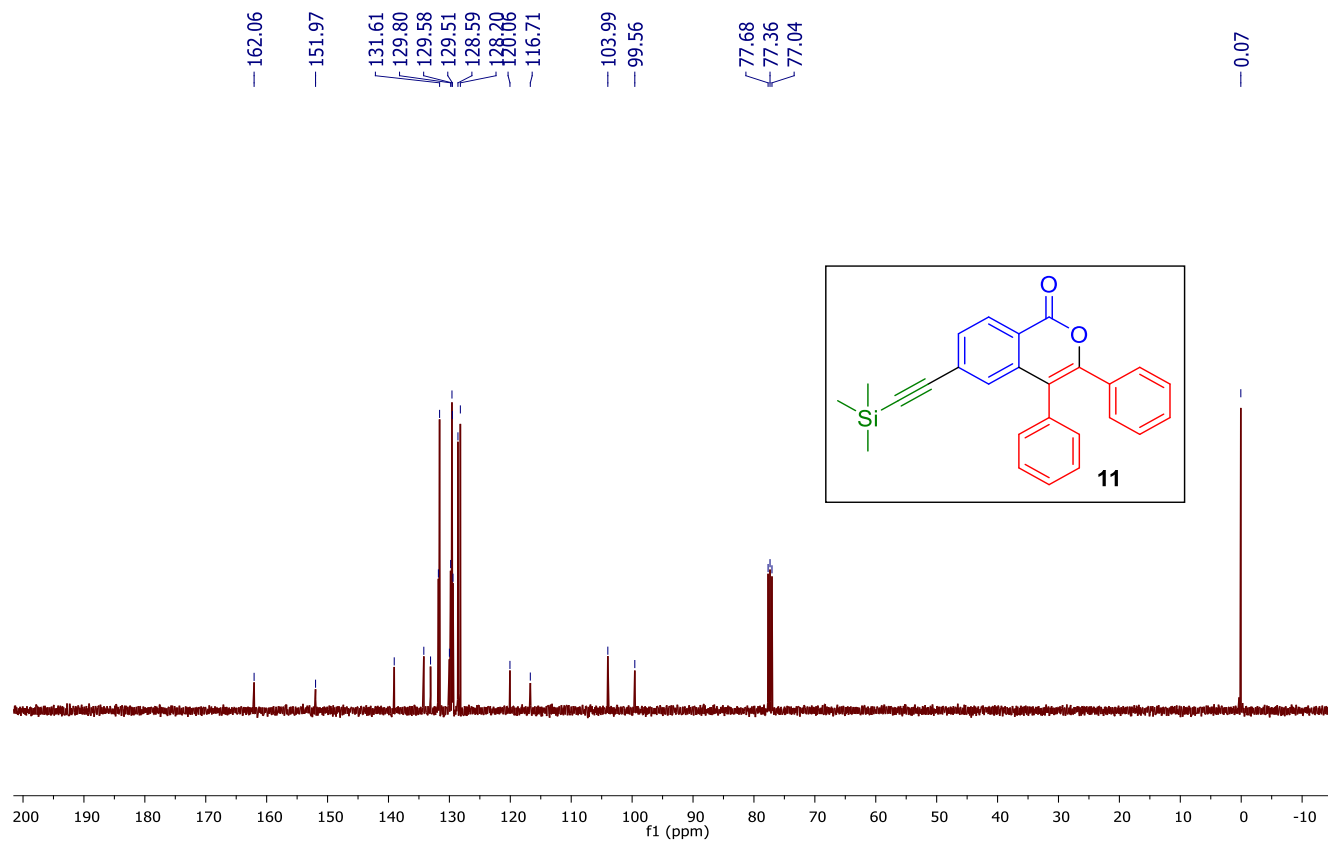

**<sup>1</sup>H NMR of 12 (400 MHz, CDCl<sub>3</sub>)**

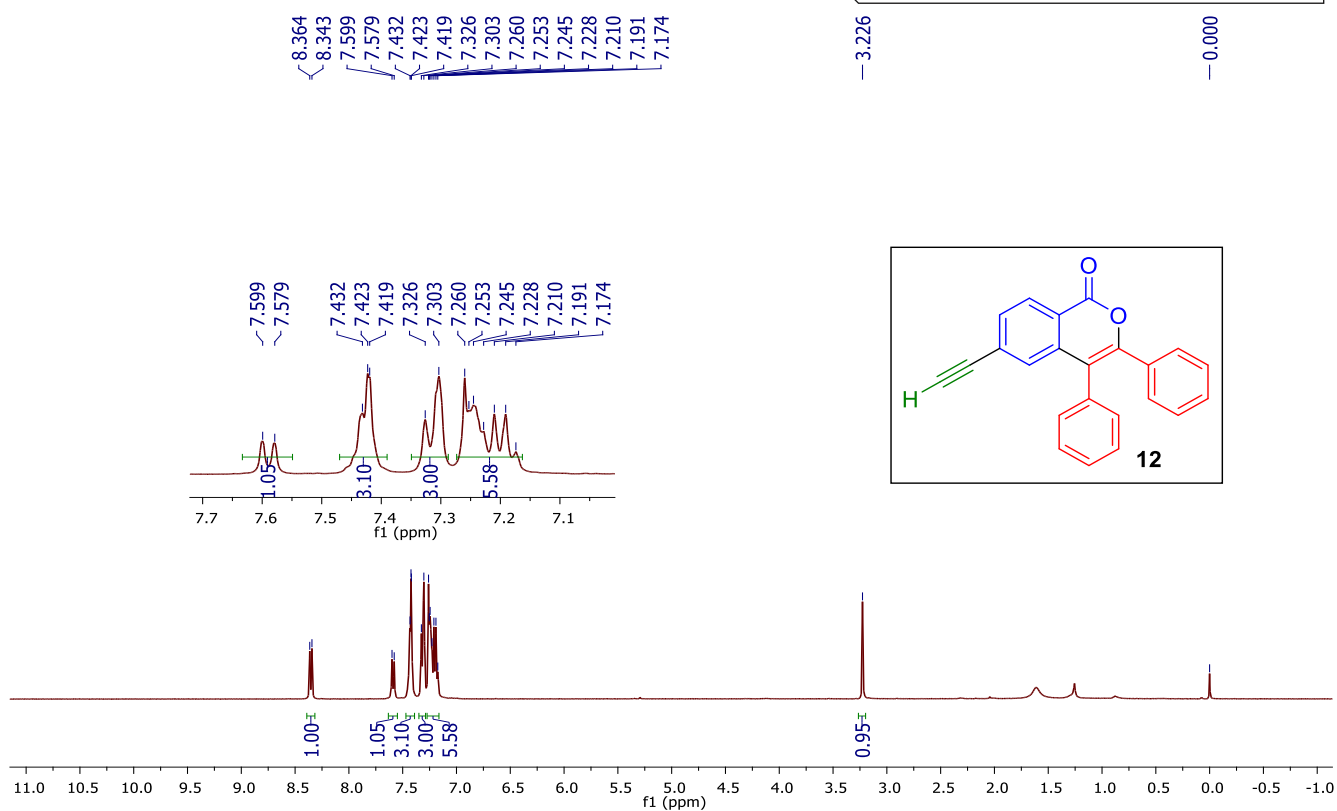

**<sup>13</sup>C{<sup>1</sup>H} NMR of 12 (100 MHz, CDCl<sub>3</sub>)**

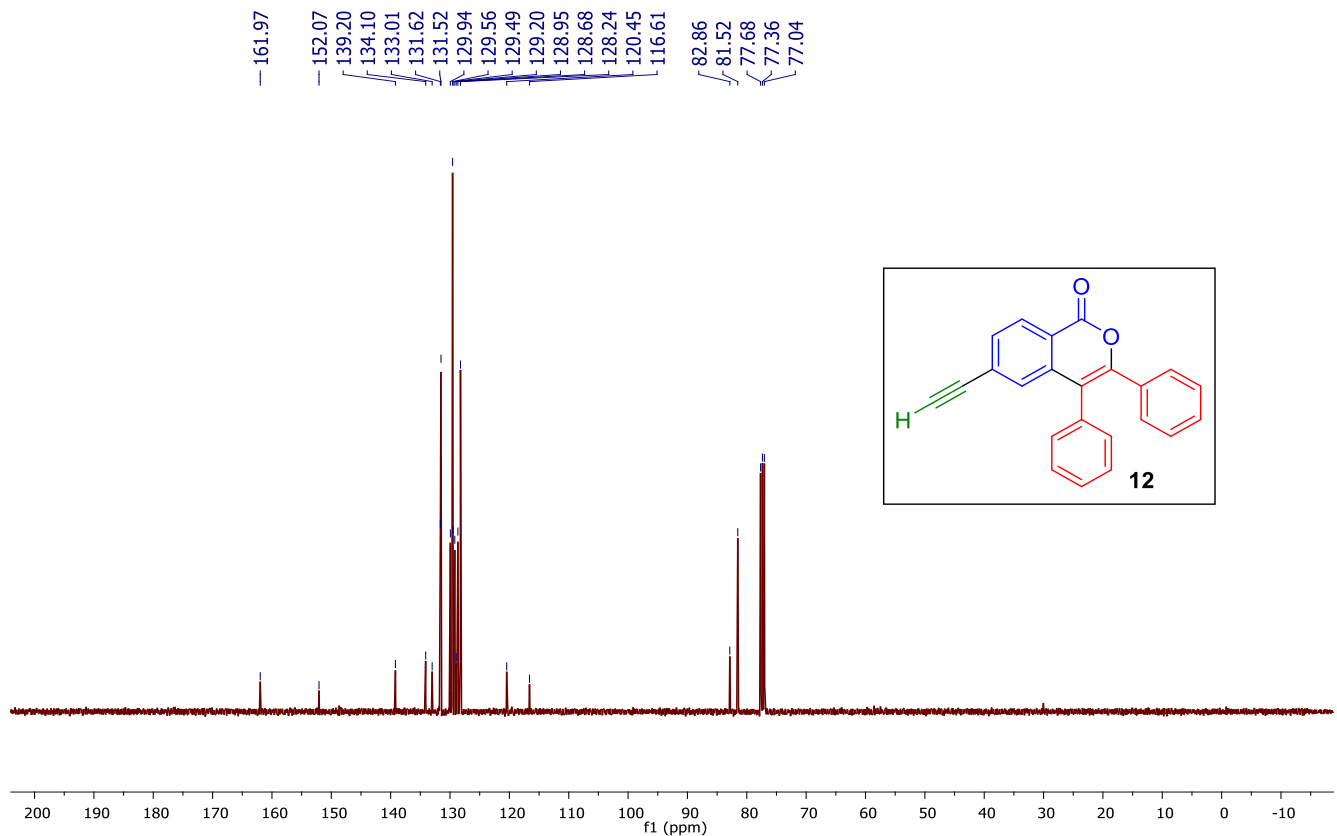

**<sup>1</sup>H NMR of 13 (400 MHz, CDCl<sub>3</sub>)**

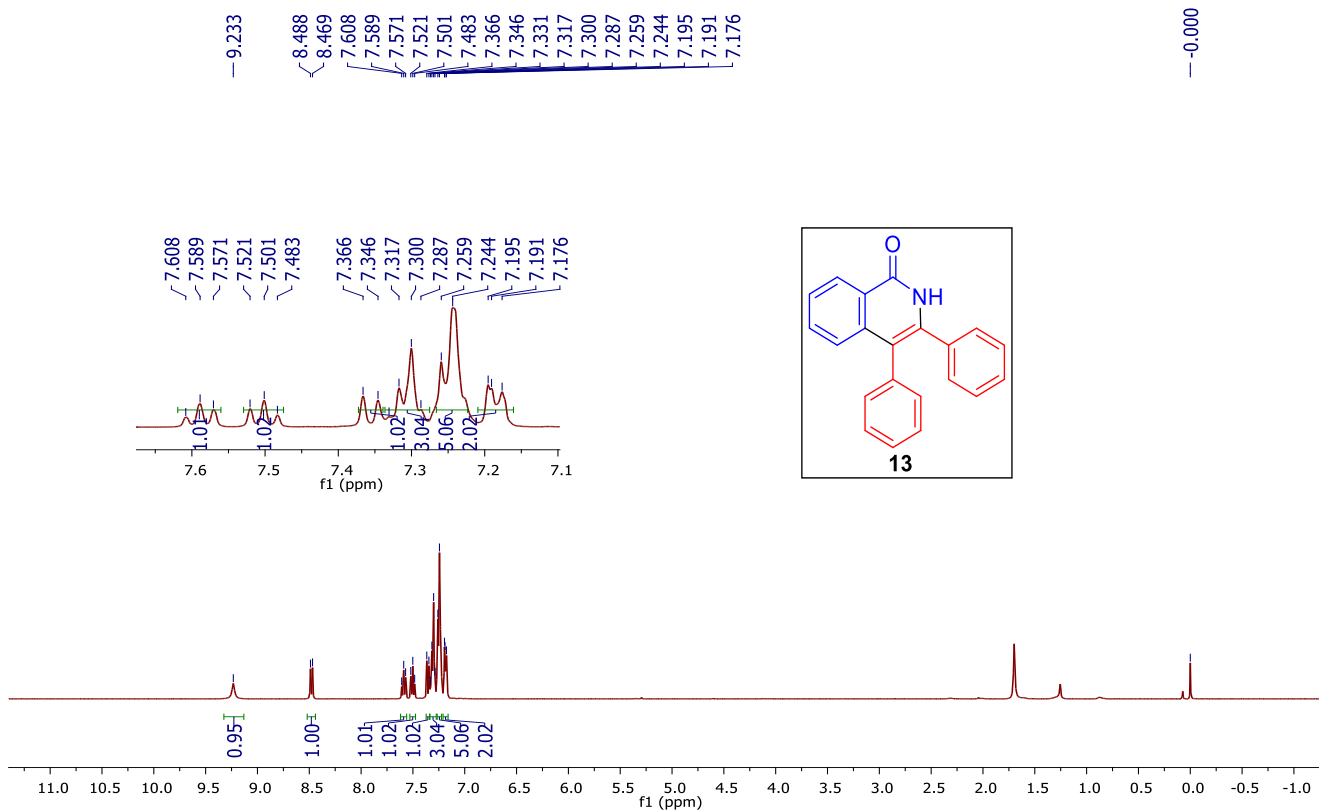

**<sup>13</sup>C{<sup>1</sup>H} NMR of 13 (100 MHz, CDCl<sub>3</sub>)**

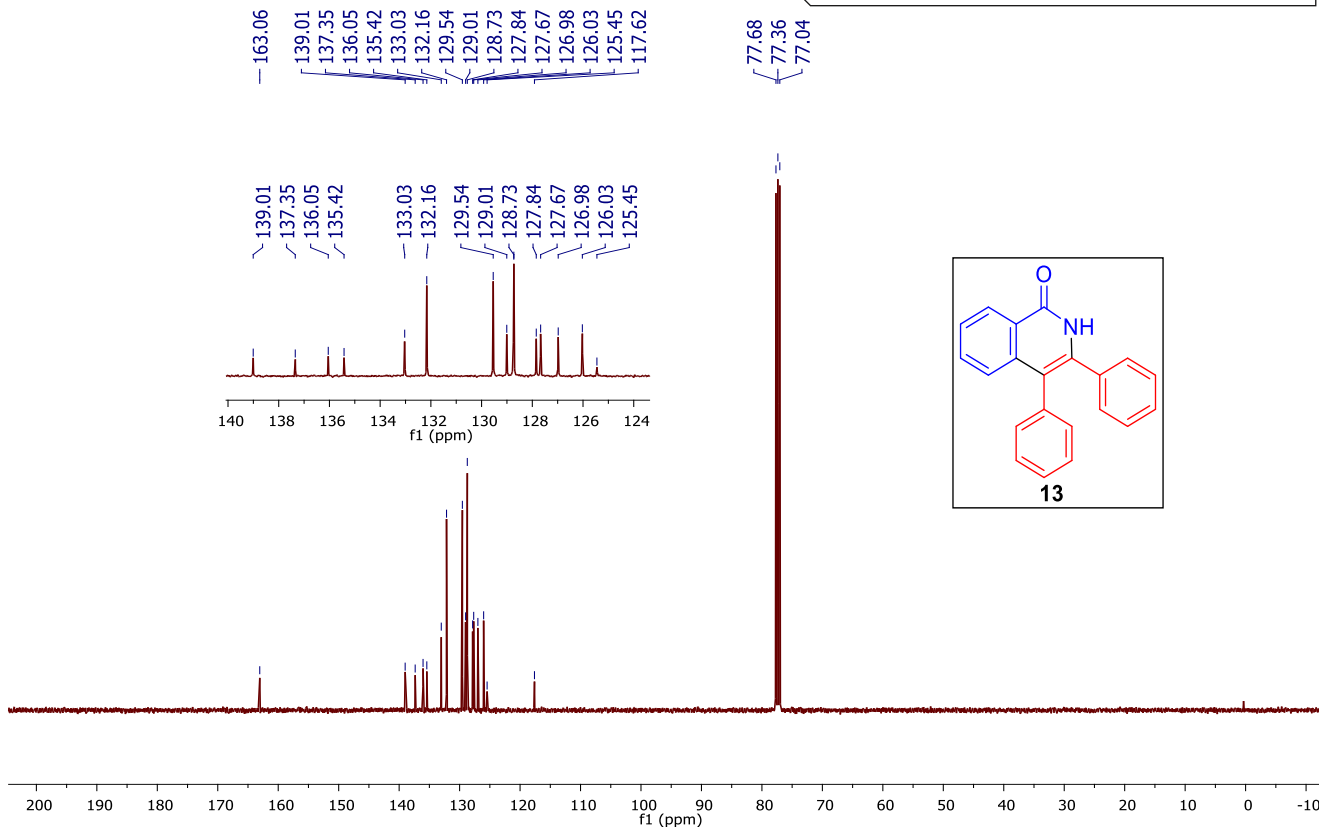

**<sup>1</sup>H NMR of 5aa (400 MHz, CDCl<sub>3</sub>)**

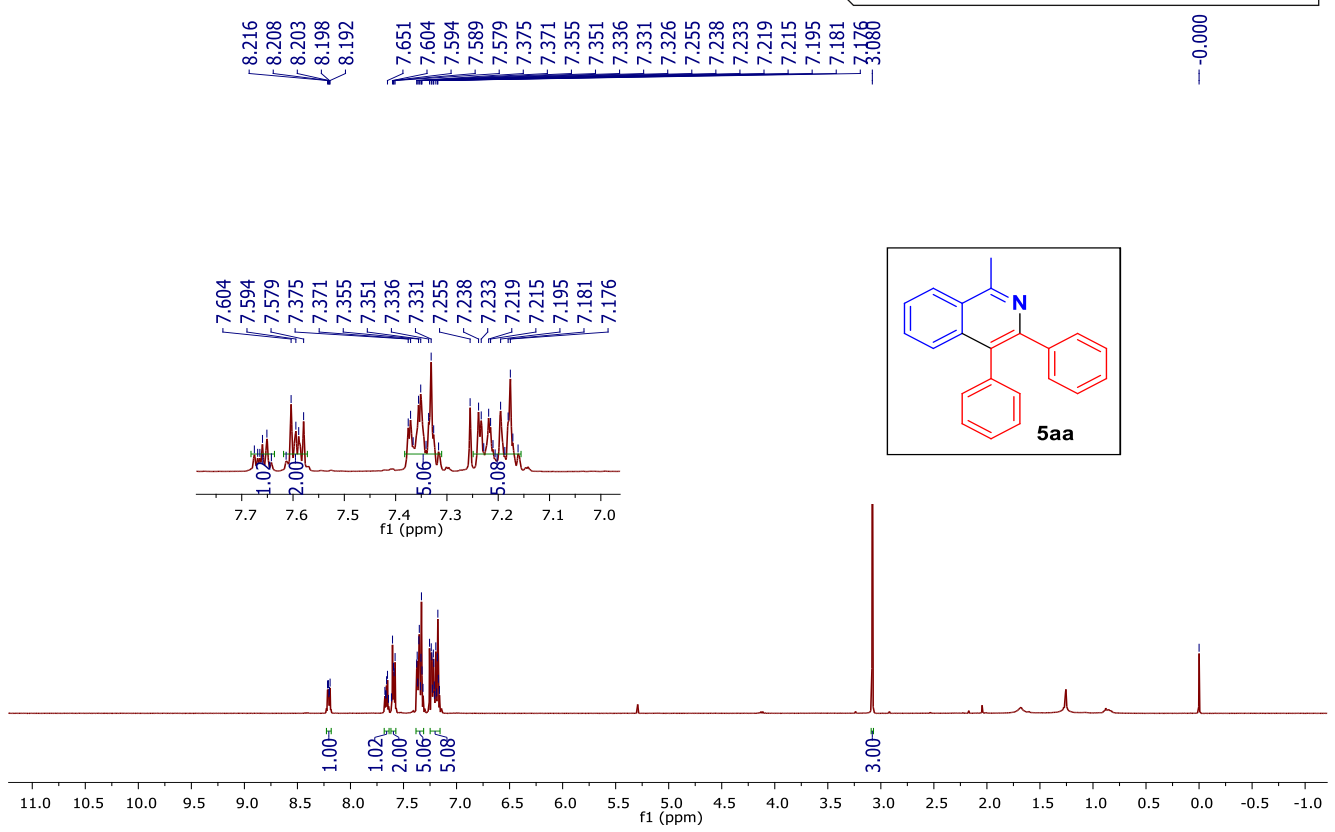

**<sup>13</sup>C{<sup>1</sup>H} NMR of 5aa (100 MHz, CDCl<sub>3</sub>)**

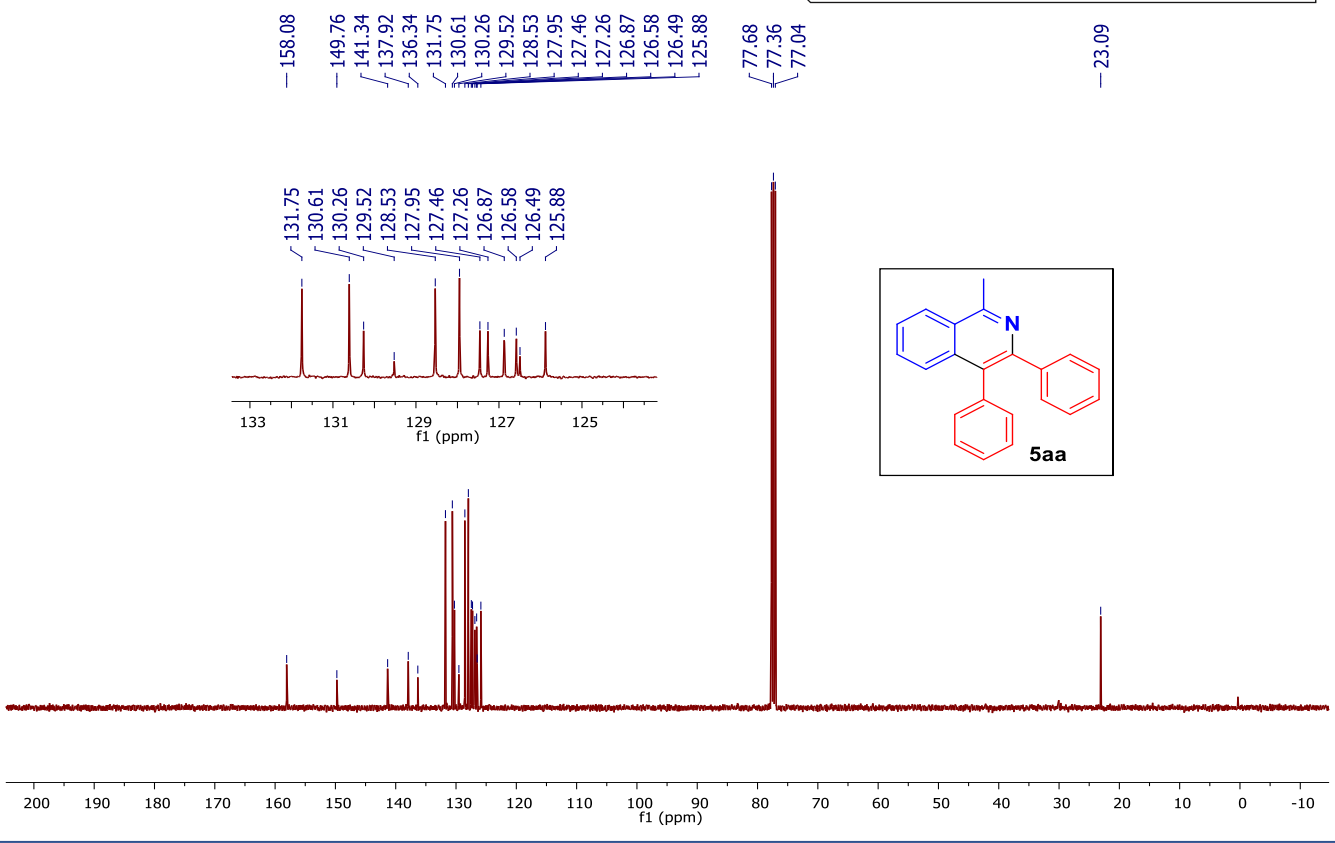

**<sup>1</sup>H NMR of 5ba (400 MHz, CDCl<sub>3</sub>)**

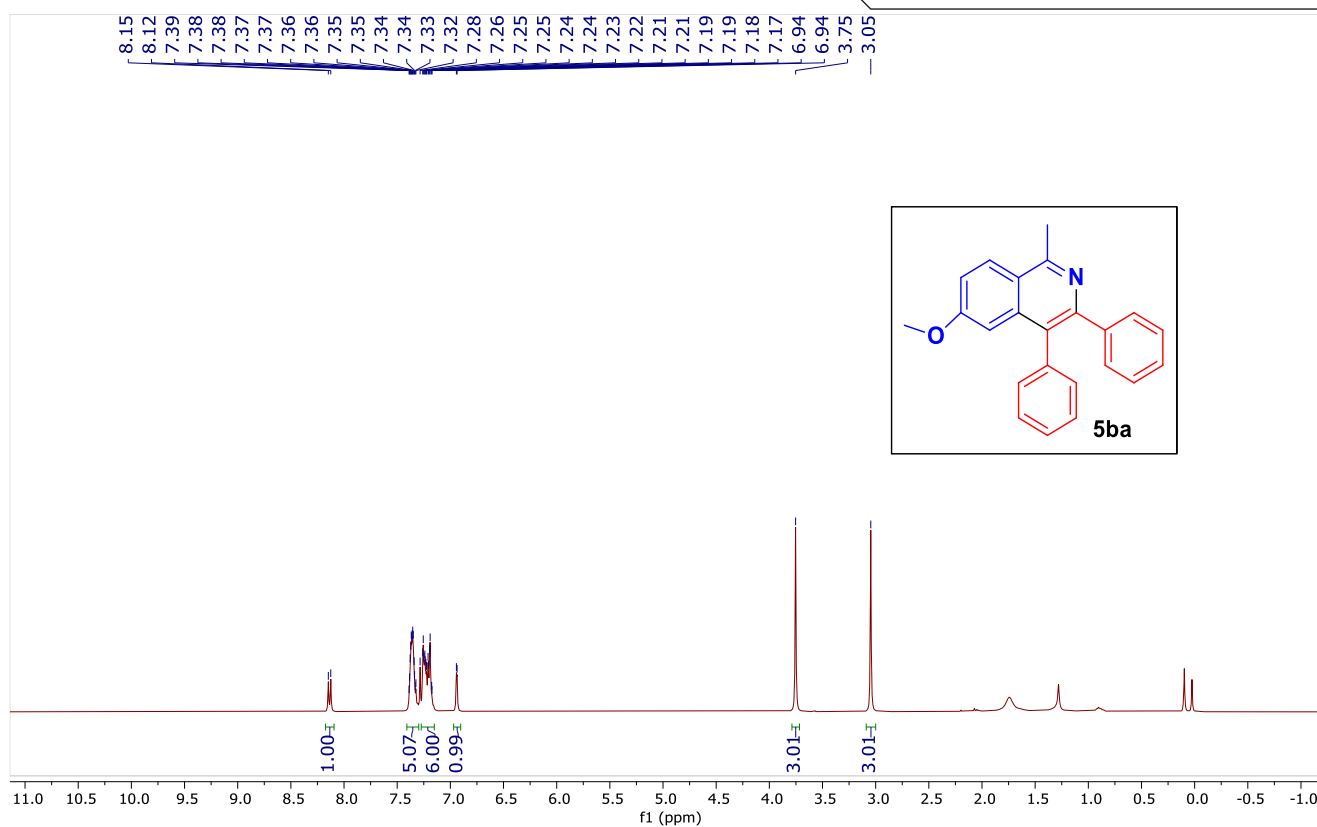

**<sup>13</sup>C{<sup>1</sup>H} NMR of 5ba (100 MHz, CDCl<sub>3</sub>)**

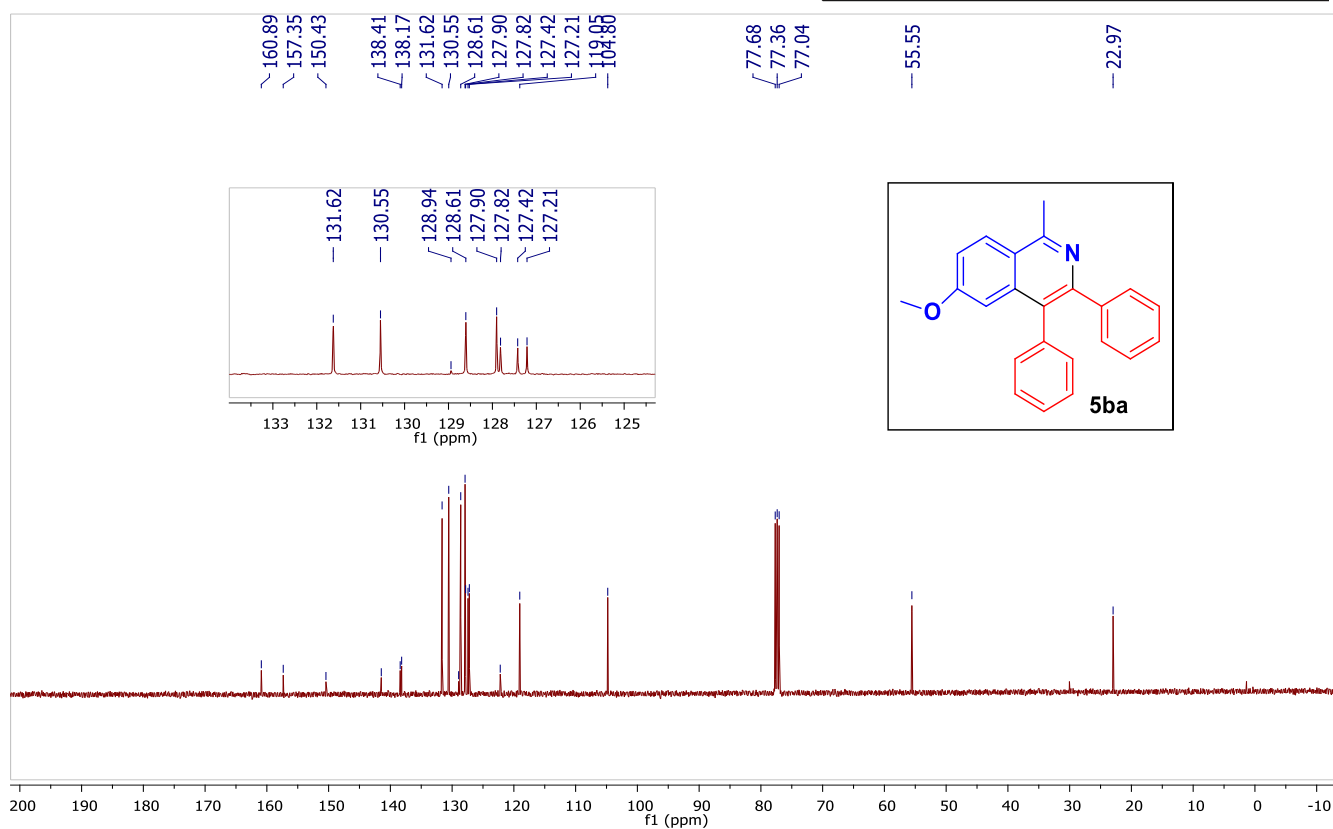

**<sup>1</sup>H NMR of 5ca (400 MHz, CDCl<sub>3</sub>)**

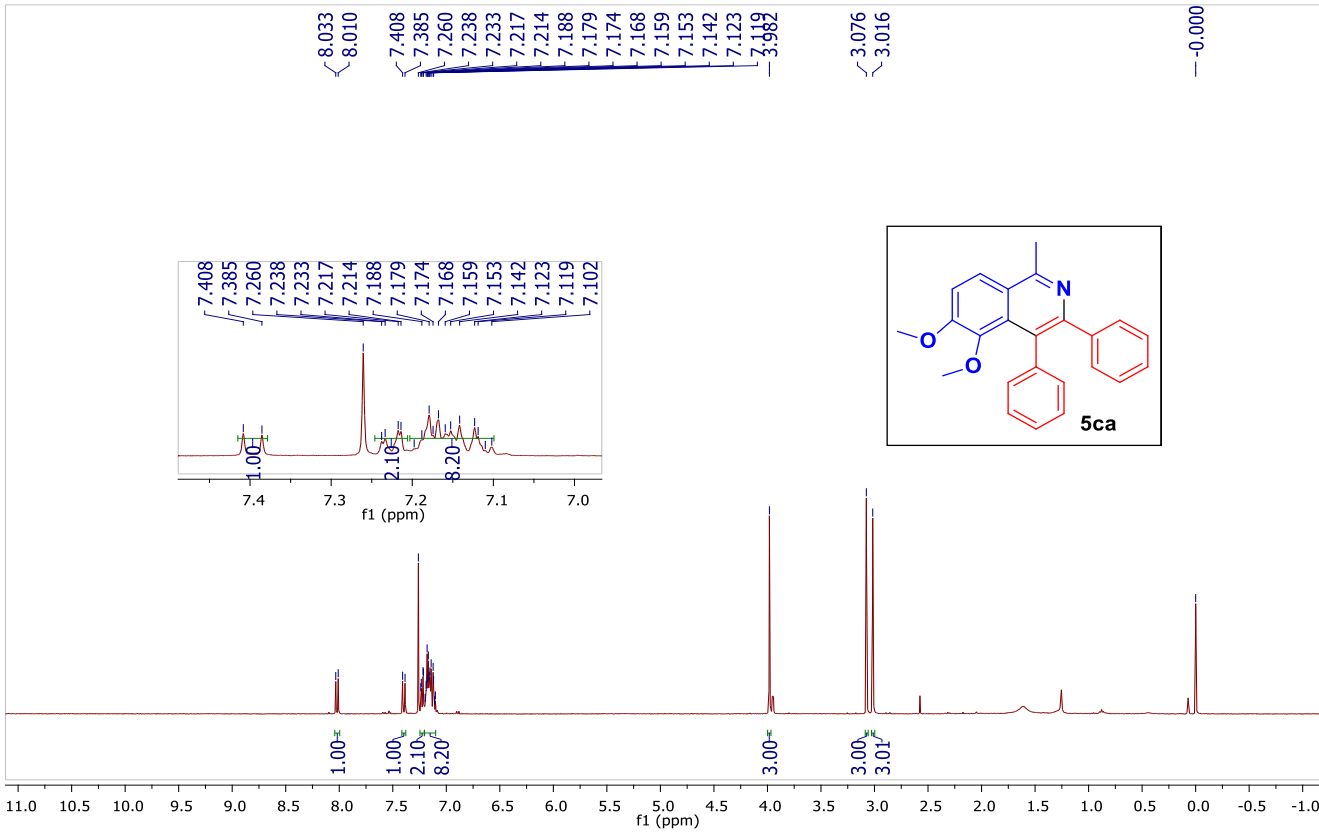

**<sup>13</sup>C{<sup>1</sup>H} NMR of 5ca (100 MHz, CDCl<sub>3</sub>)**

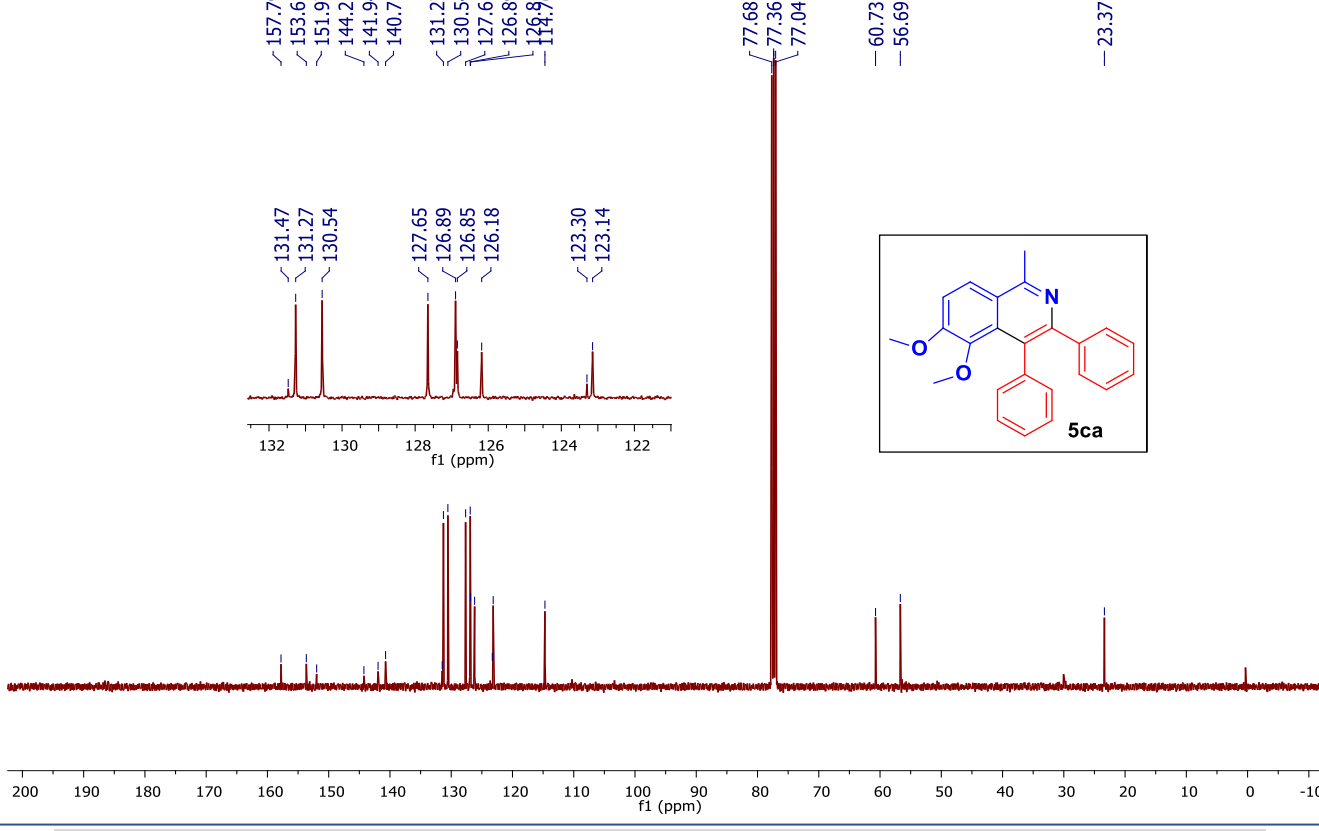

**<sup>1</sup>H NMR of 5ca' (400 MHz, CDCl<sub>3</sub>)**

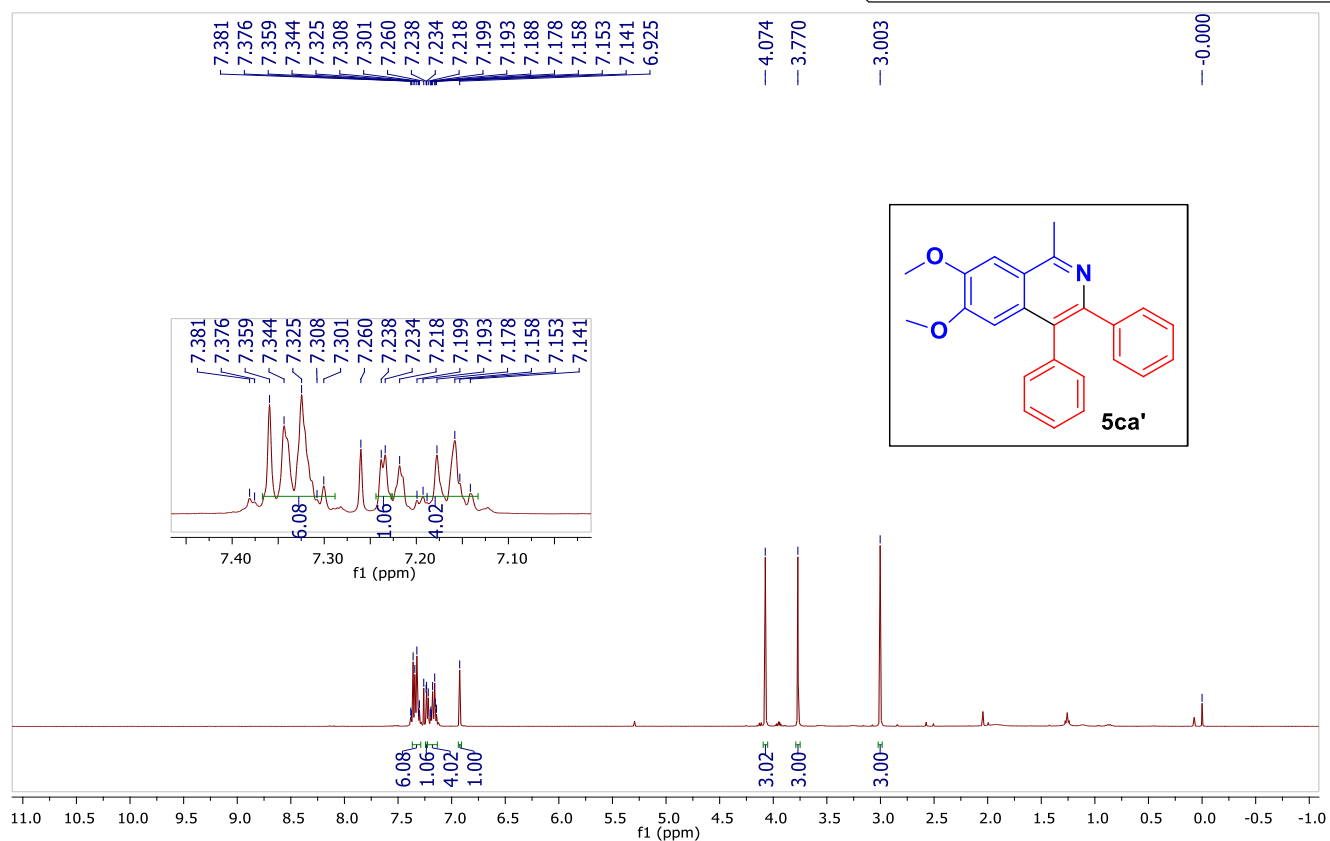

**<sup>13</sup>C{<sup>1</sup>H} NMR of 5ca' (176 MHz, CDCl<sub>3</sub>)**

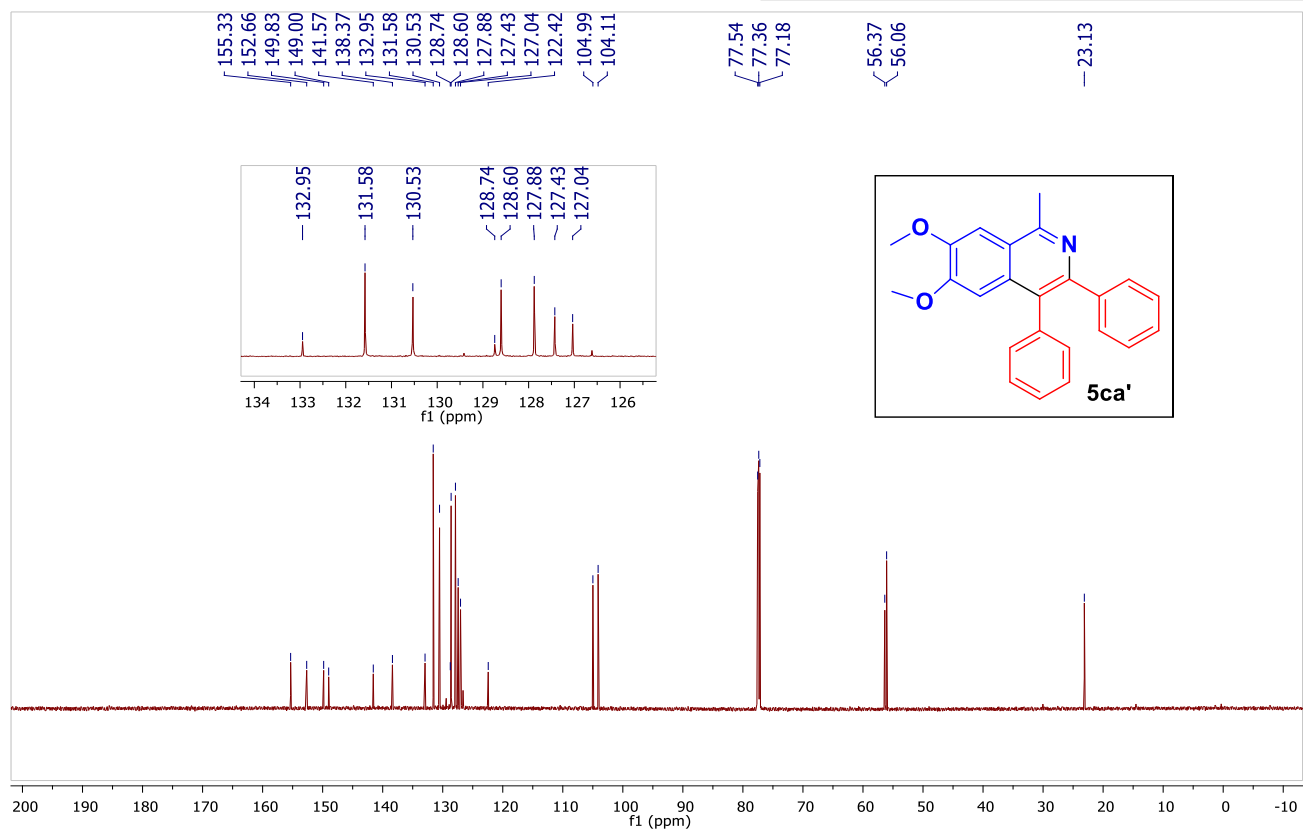

**<sup>1</sup>H NMR of 5da (400 MHz, CDCl<sub>3</sub>)**

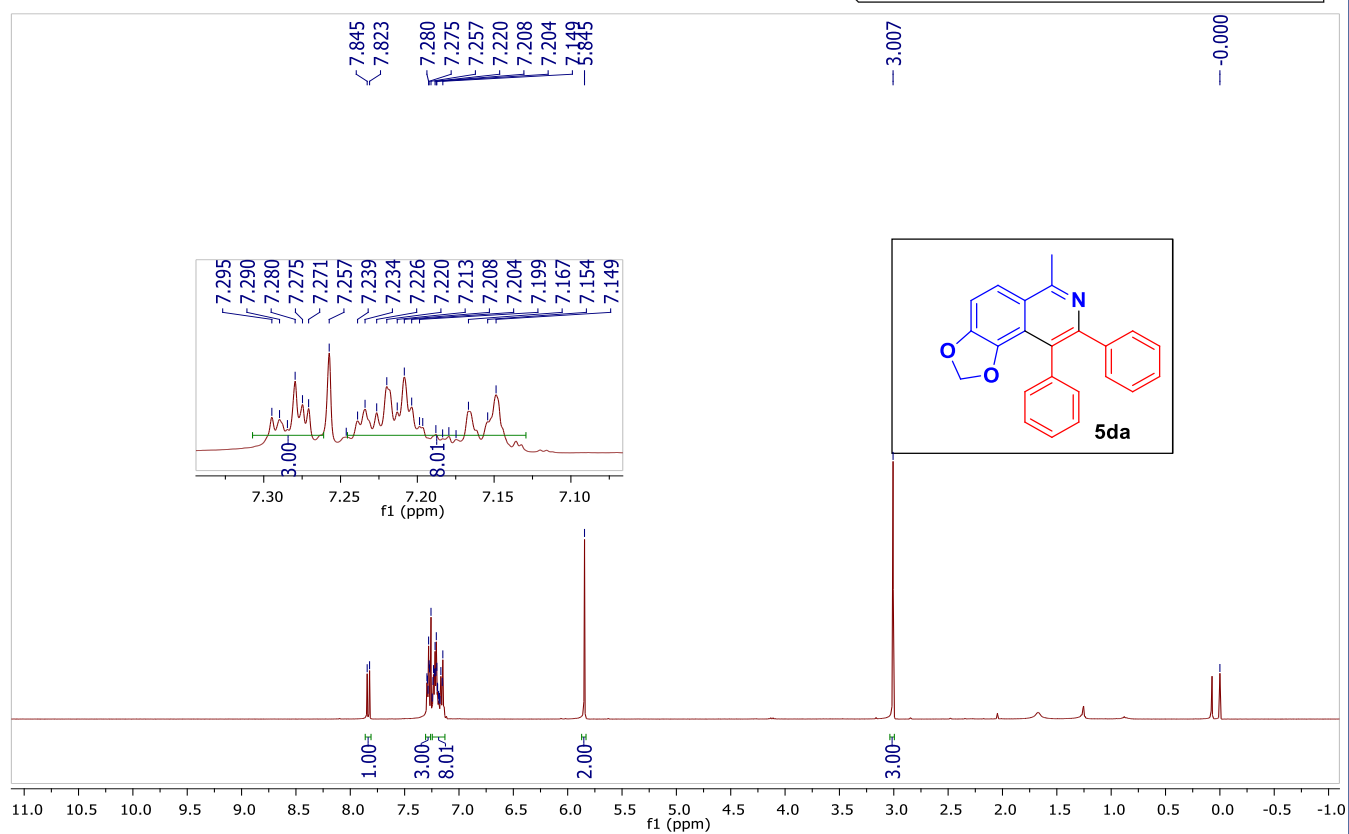

**<sup>13</sup>C{<sup>1</sup>H} NMR of 5da (100 MHz, CDCl<sub>3</sub>)**

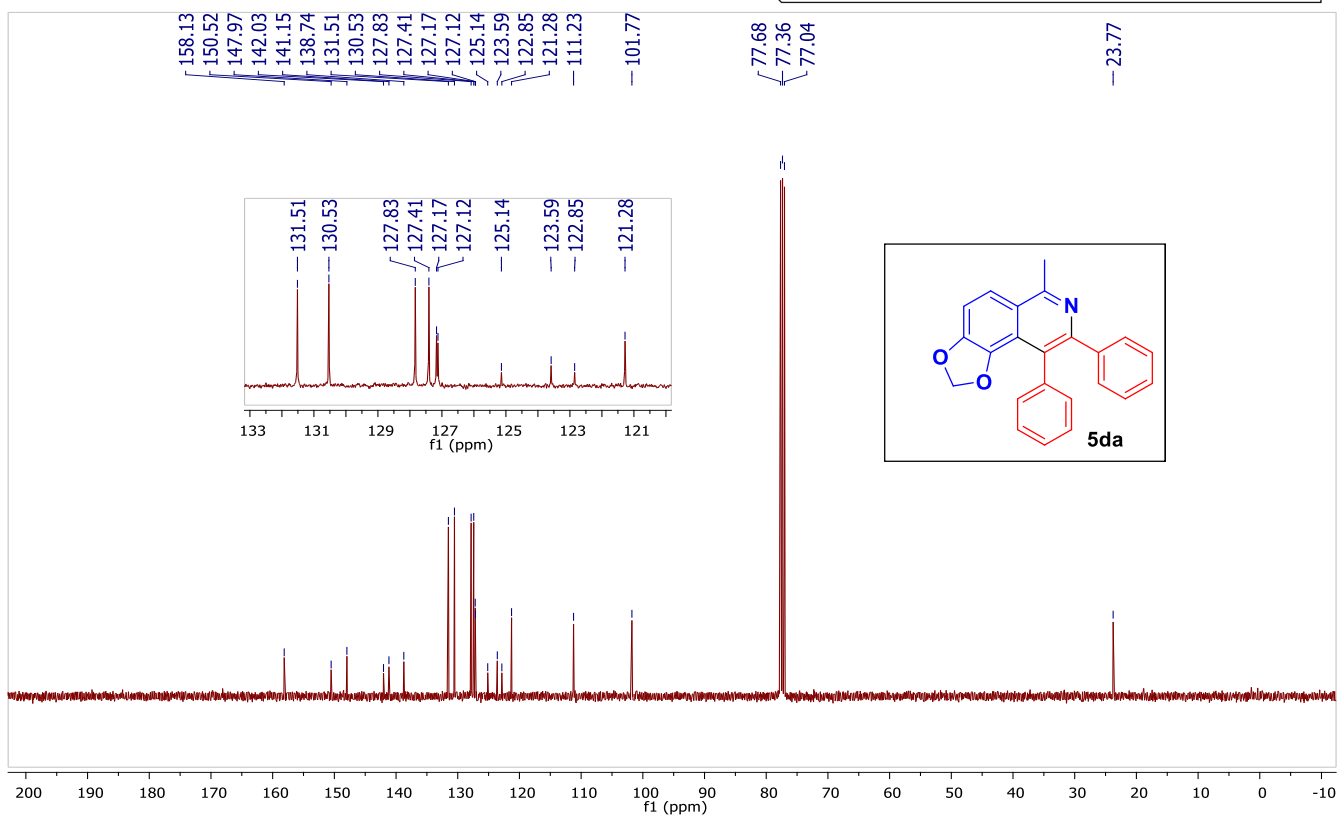

**<sup>1</sup>H NMR of 5ea (400 MHz, CDCl<sub>3</sub>)**

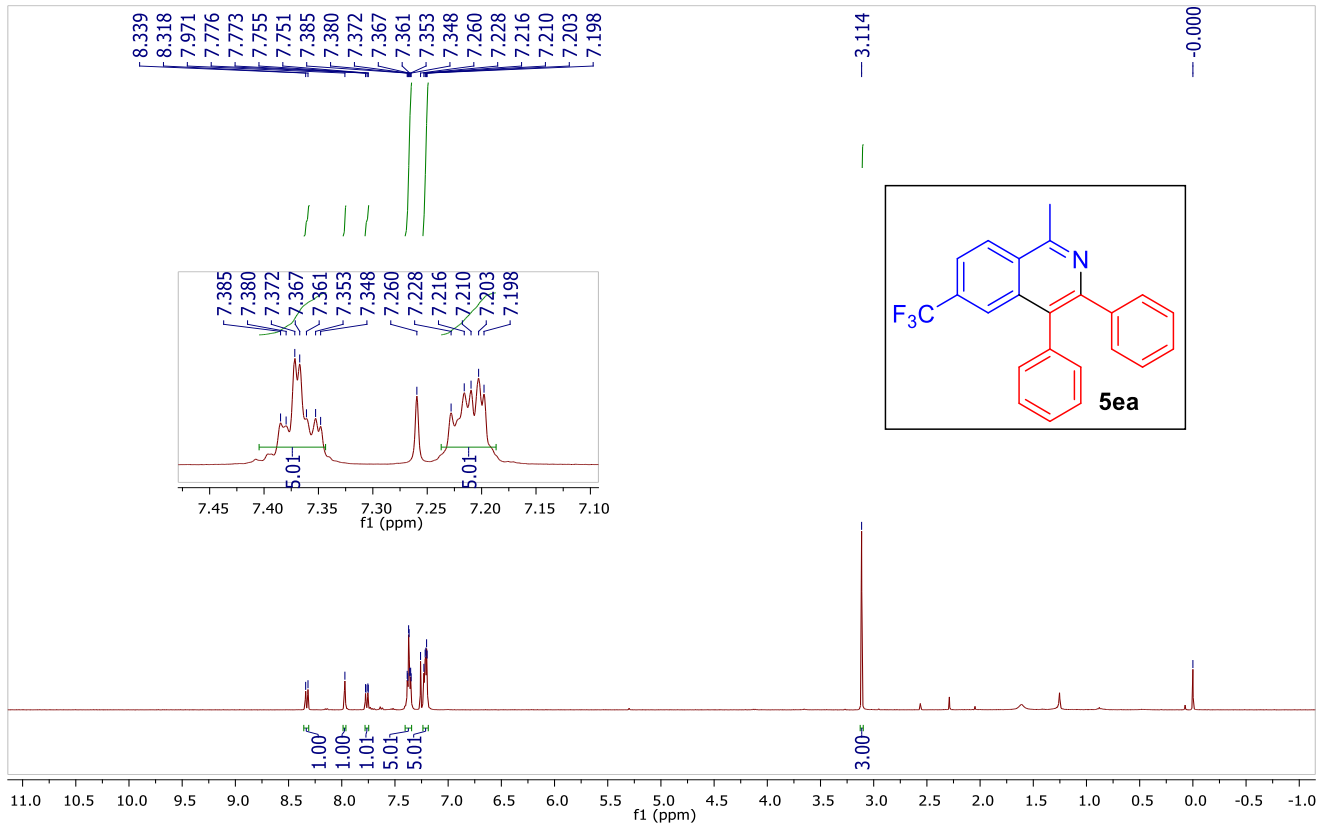

**<sup>13</sup>C{<sup>1</sup>H} NMR of 5ea (176 MHz, CDCl<sub>3</sub>)**

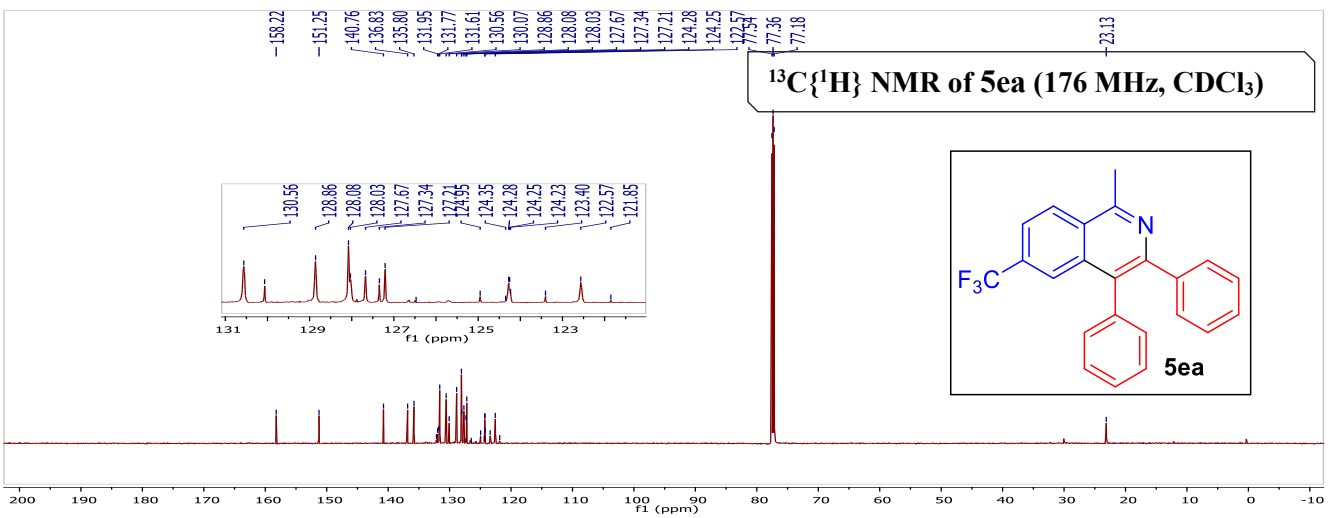

**<sup>19</sup>F NMR of 5ea (376 MHz, CDCl<sub>3</sub>)**

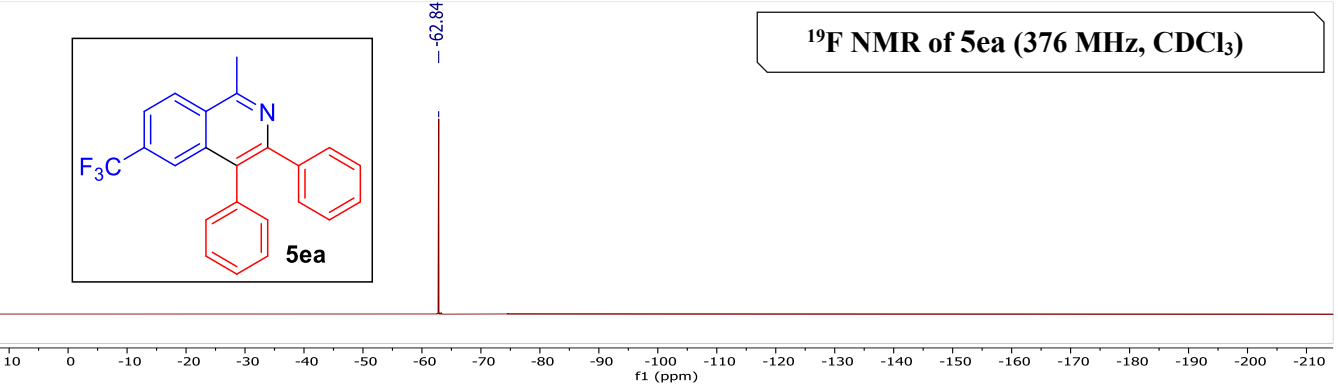

**<sup>1</sup>H NMR of 5fa (400 MHz, CDCl<sub>3</sub>)**

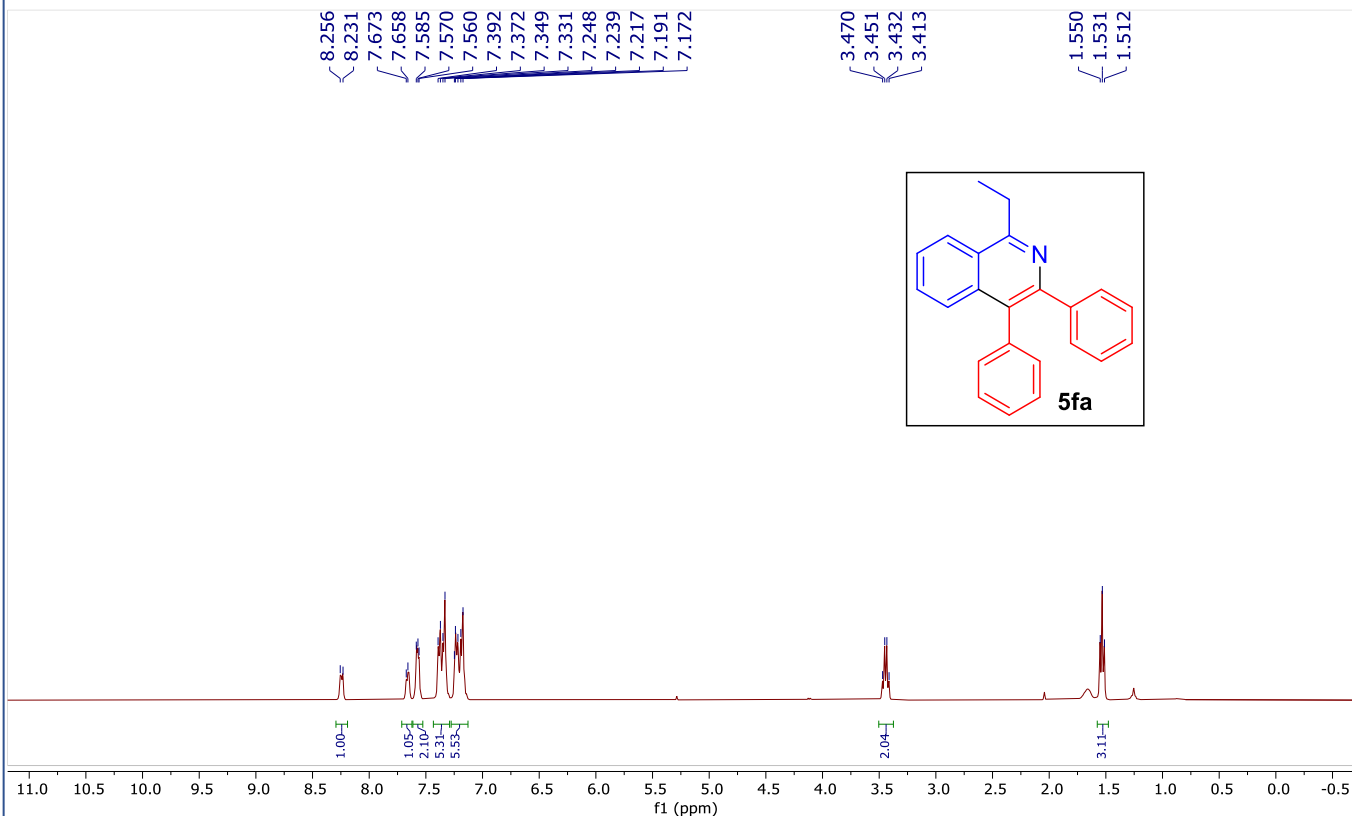

**<sup>13</sup>C{<sup>1</sup>H} NMR of 5fa (100 MHz, CDCl<sub>3</sub>)**

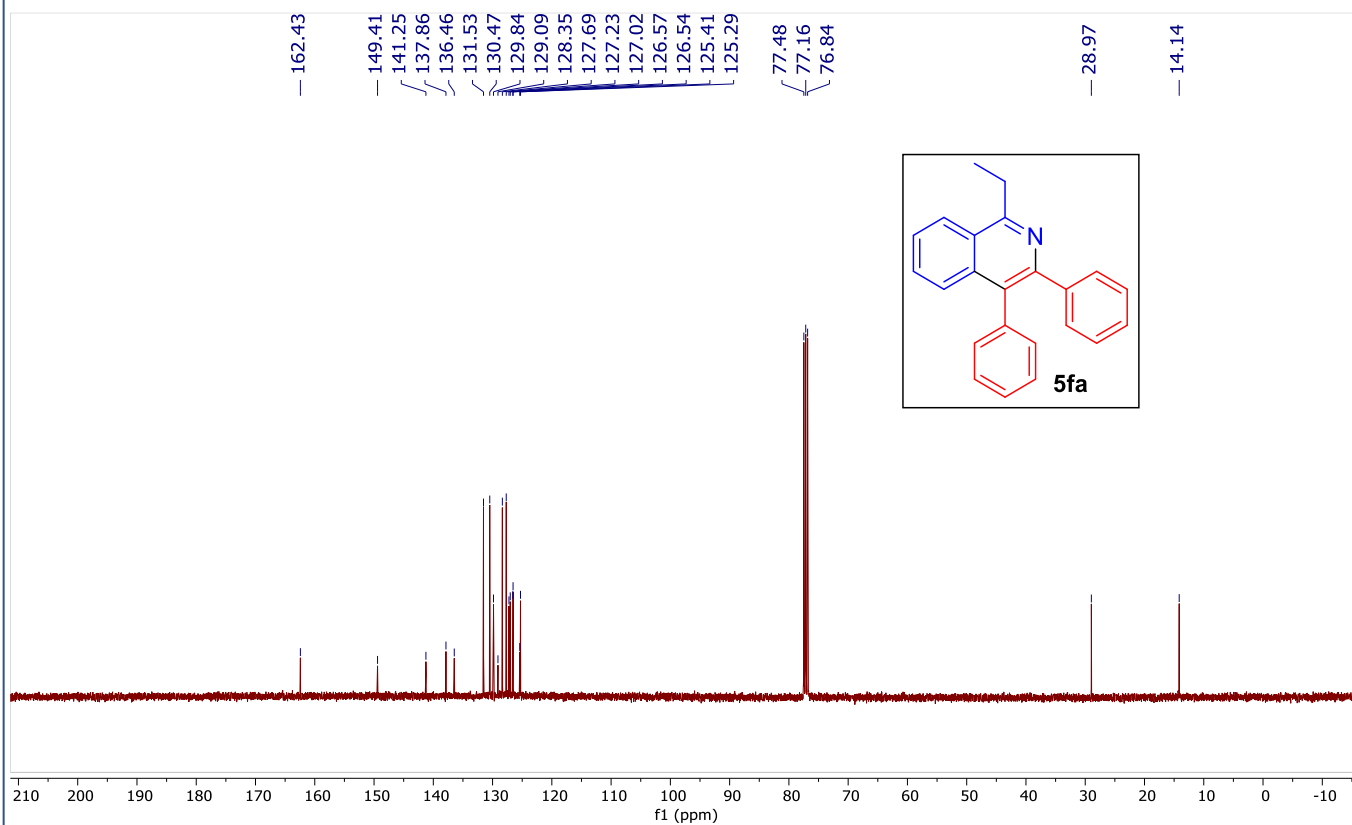

**<sup>1</sup>H NMR of 5ga (400 MHz, CDCl<sub>3</sub>)**

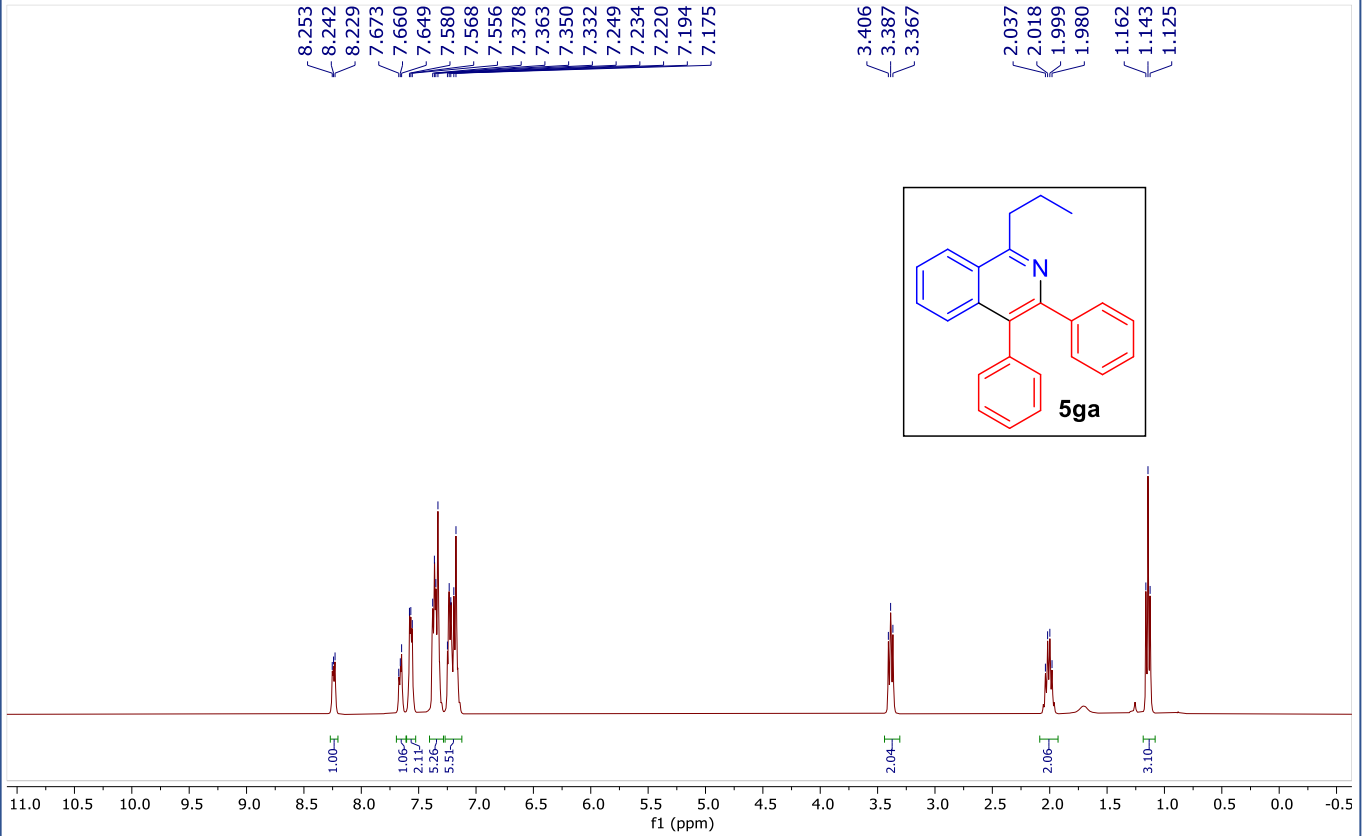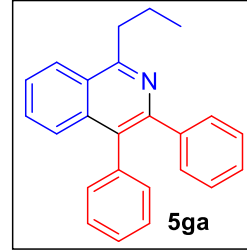

**<sup>13</sup>C{<sup>1</sup>H} NMR of 5ga (100 MHz, CDCl<sub>3</sub>)**

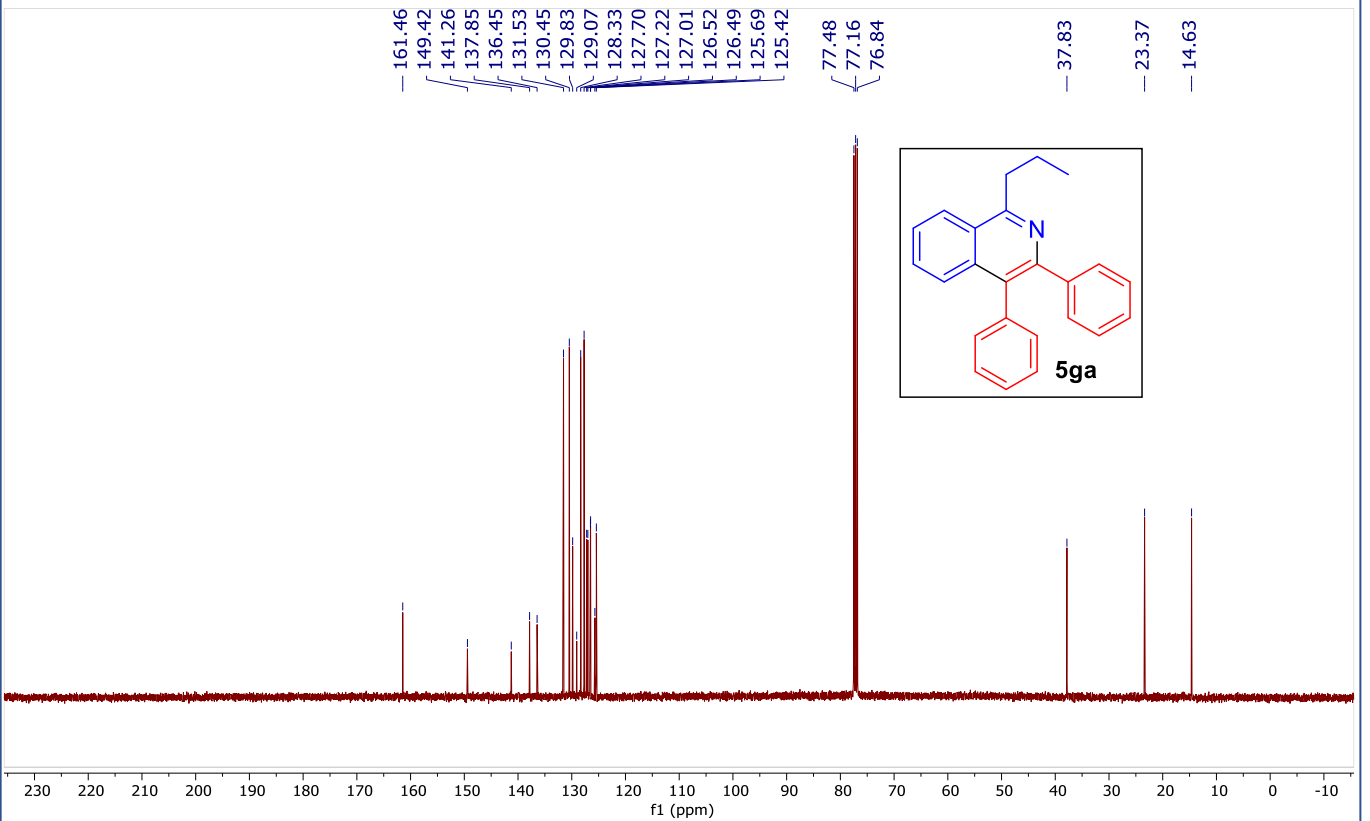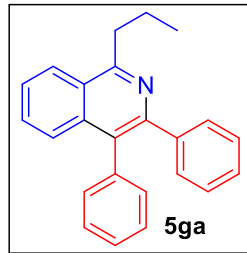

**<sup>1</sup>H NMR of 5ia (400 MHz, CDCl<sub>3</sub>)**

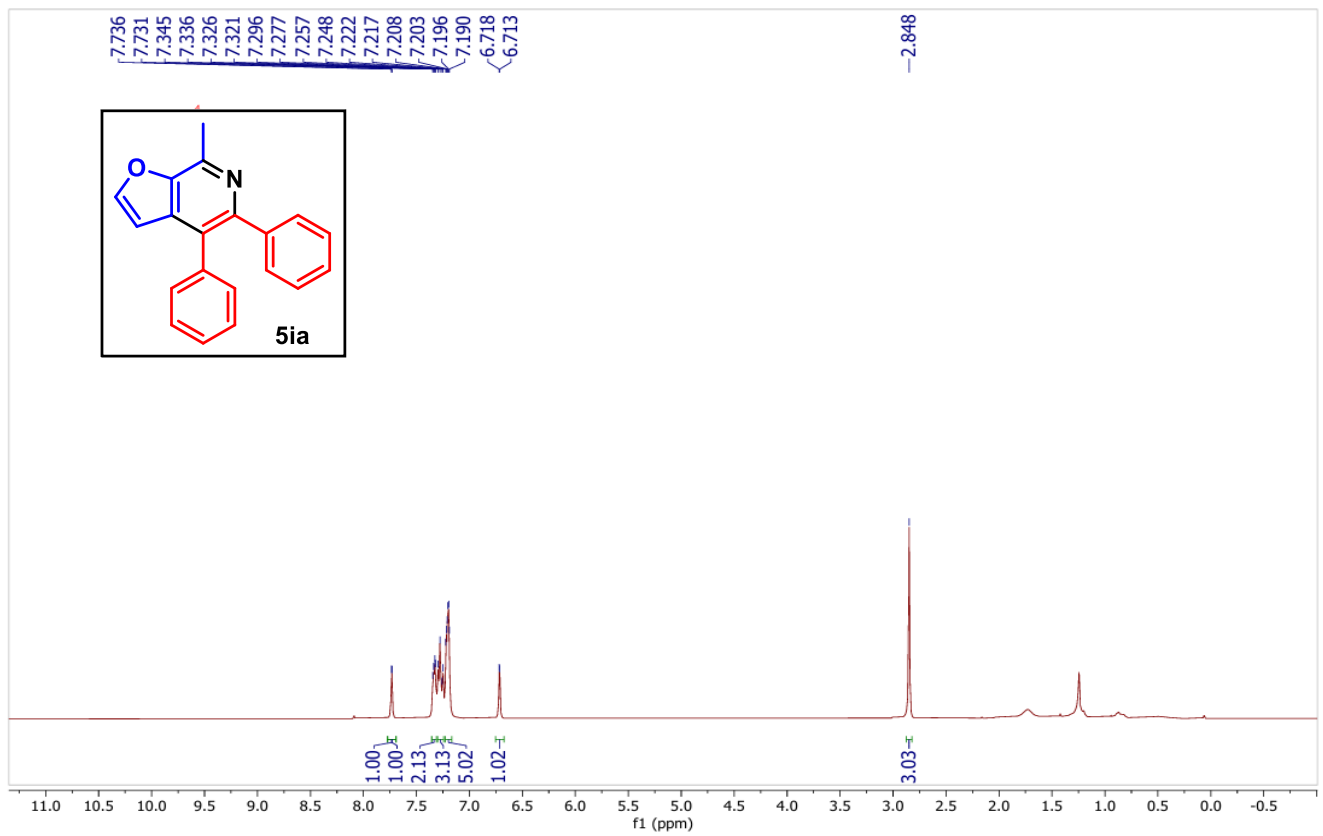

**<sup>13</sup>C{<sup>1</sup>H} NMR of 5ia (100 MHz, CDCl<sub>3</sub>)**

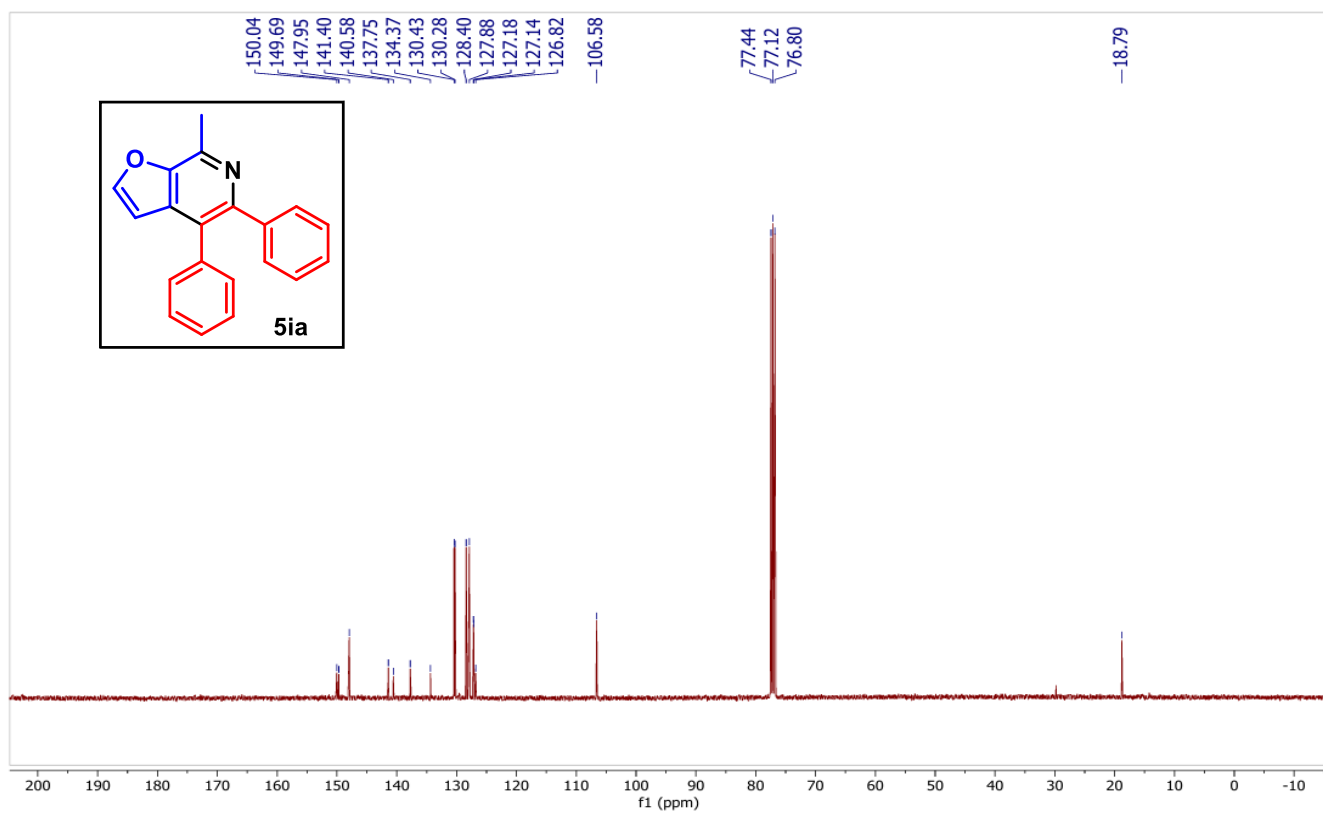

**<sup>1</sup>H NMR of 5db (400 MHz, CDCl<sub>3</sub>)**

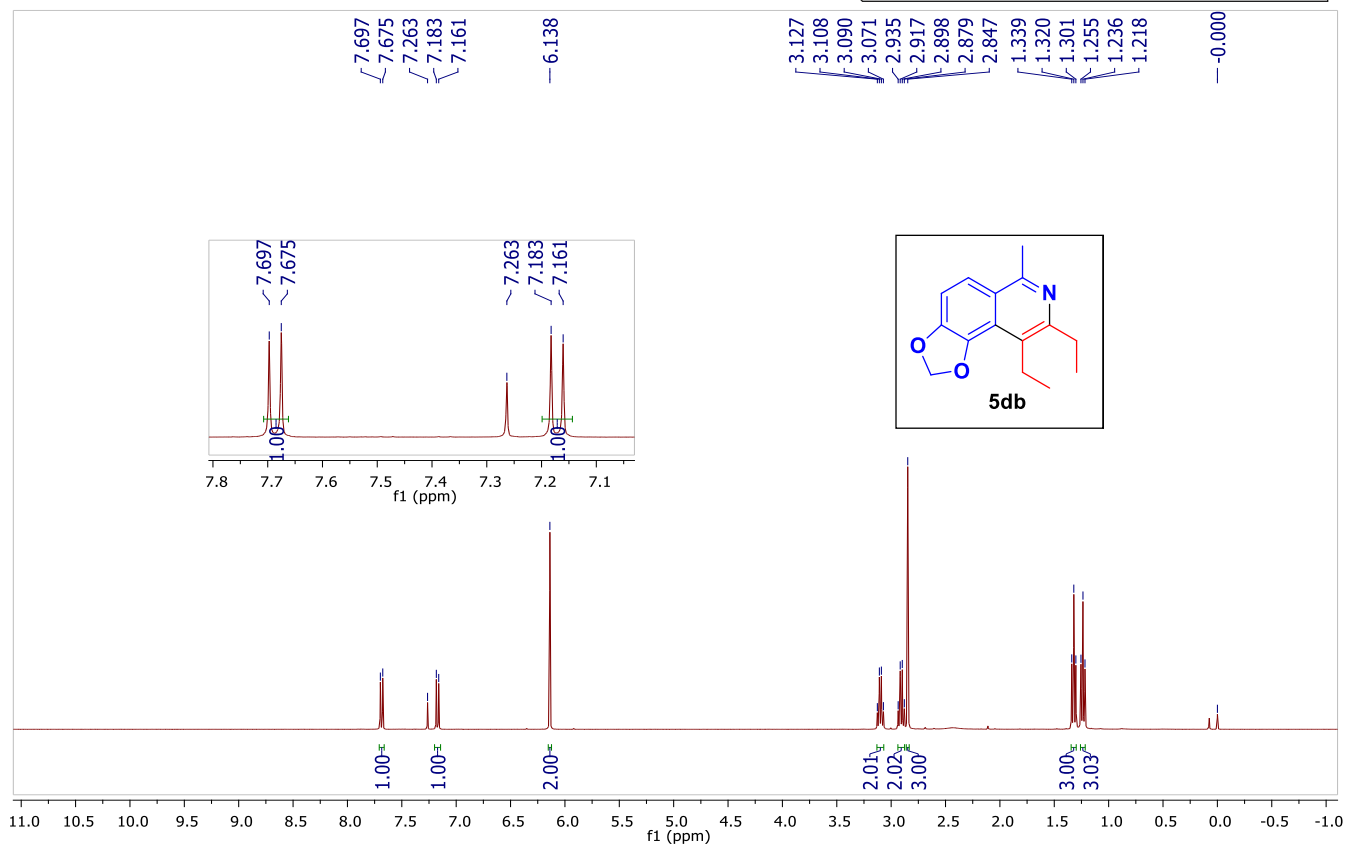

**<sup>13</sup>C{<sup>1</sup>H} NMR of 5db (176 MHz, CDCl<sub>3</sub>)**

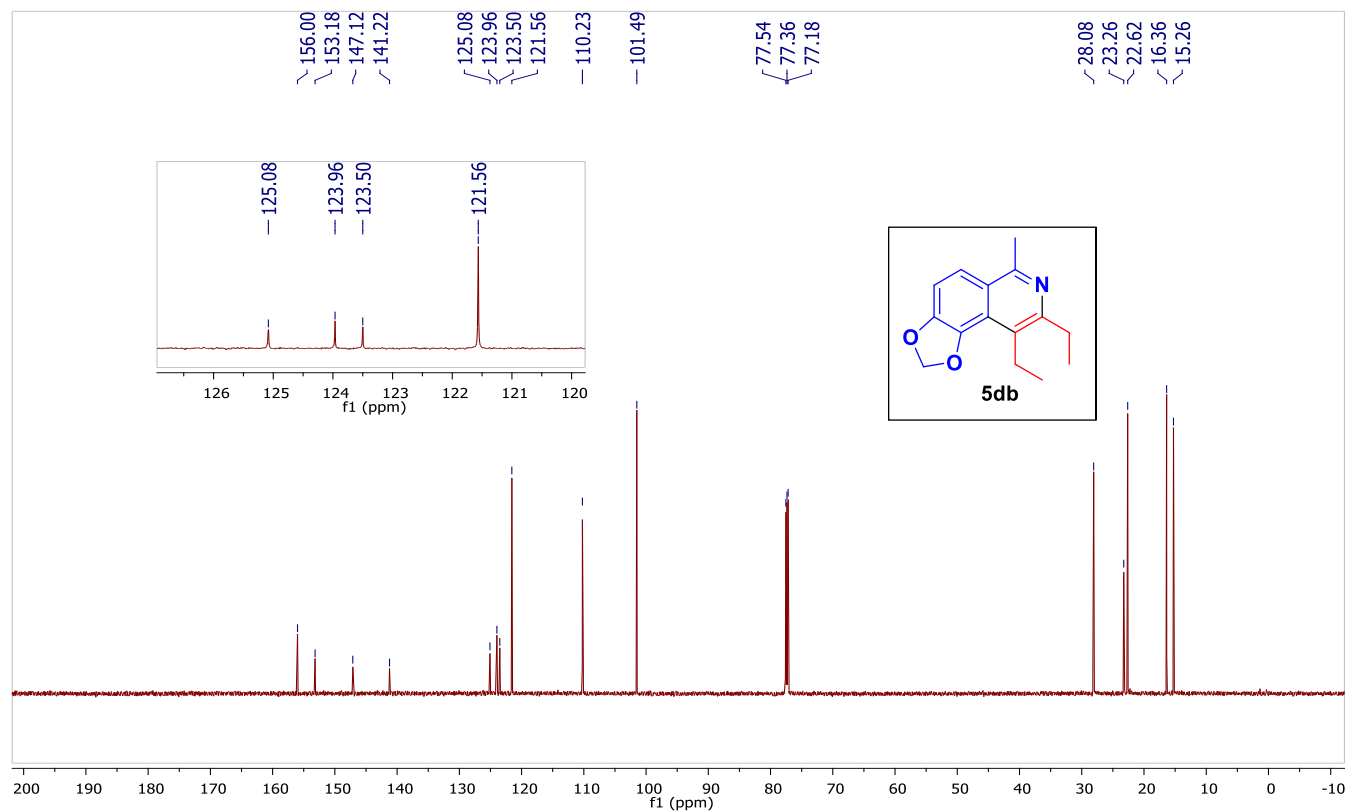

**<sup>1</sup>H NMR of 5dc (400 MHz, CDCl<sub>3</sub>)**

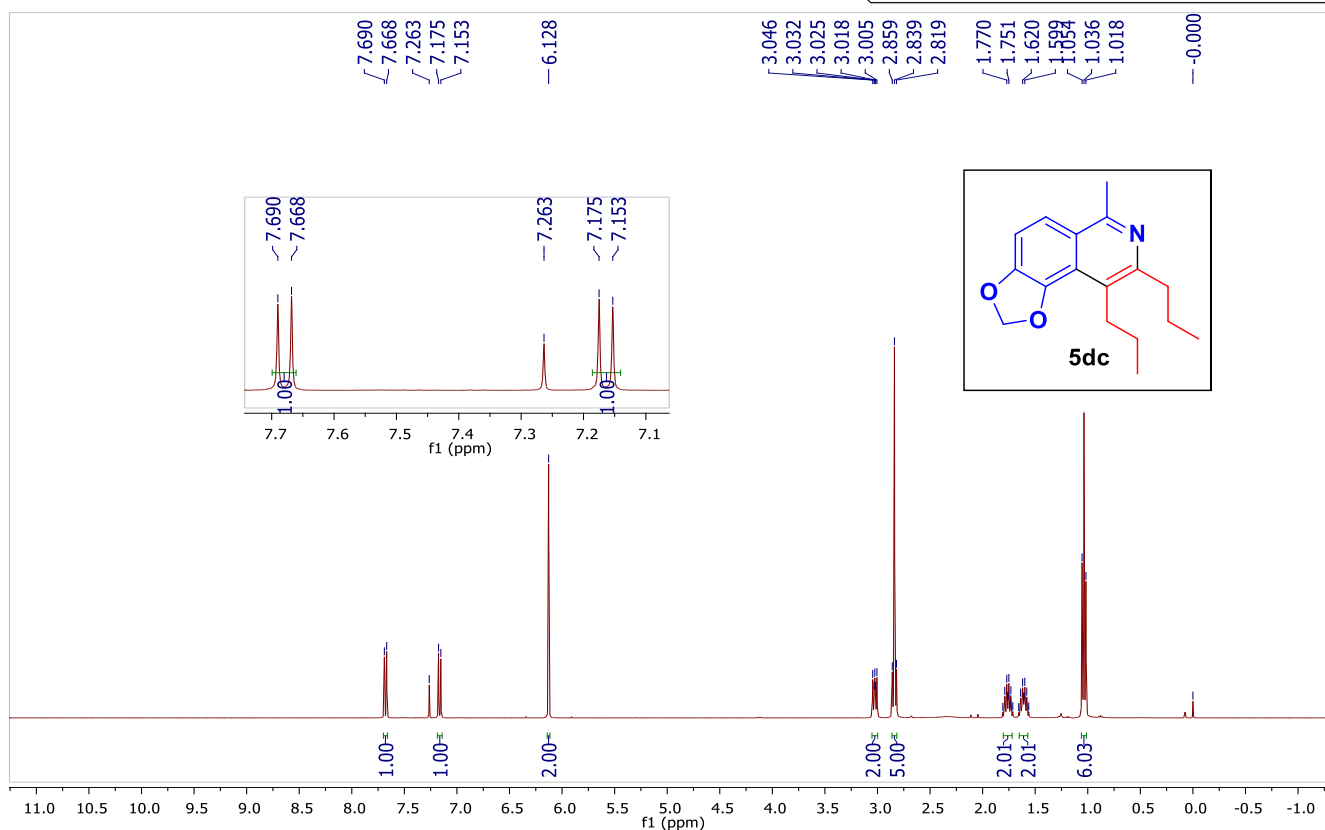

**<sup>13</sup>C{<sup>1</sup>H} NMR of 5dc (100 MHz, CDCl<sub>3</sub>)**

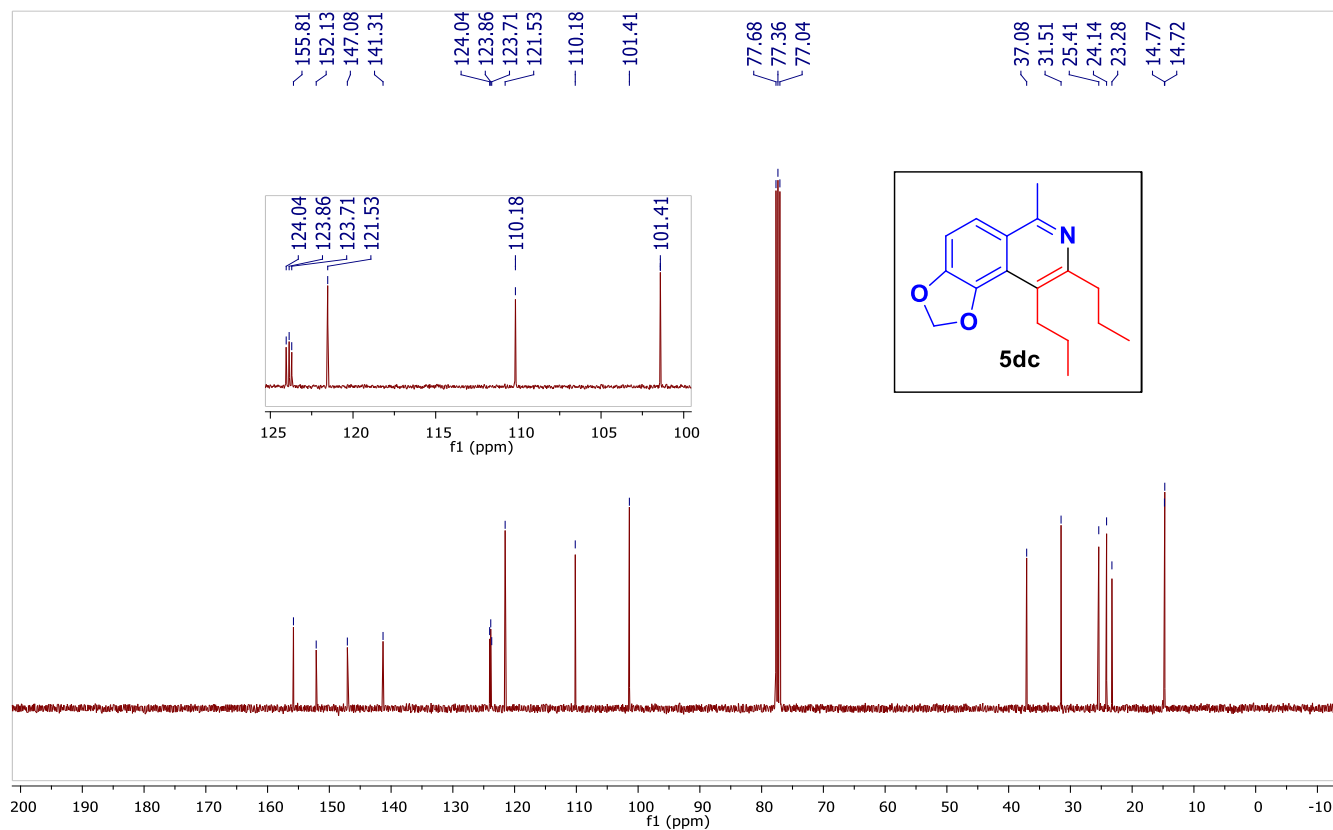



### <sup>1</sup>H NMR of 5dg (400 MHz, CDCl<sub>3</sub>)

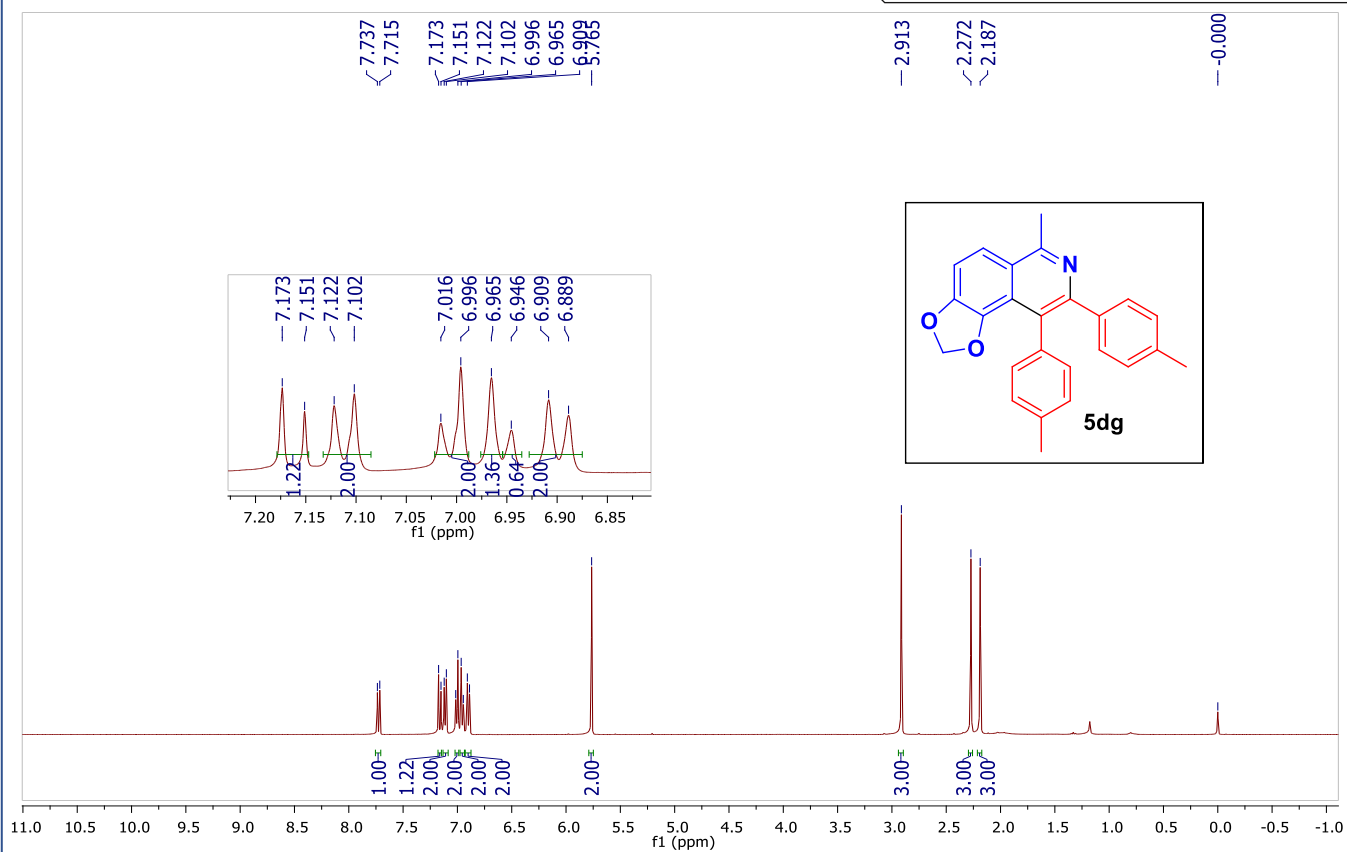

### <sup>13</sup>C{<sup>1</sup>H} NMR of 5dg (100 MHz, CDCl<sub>3</sub>)

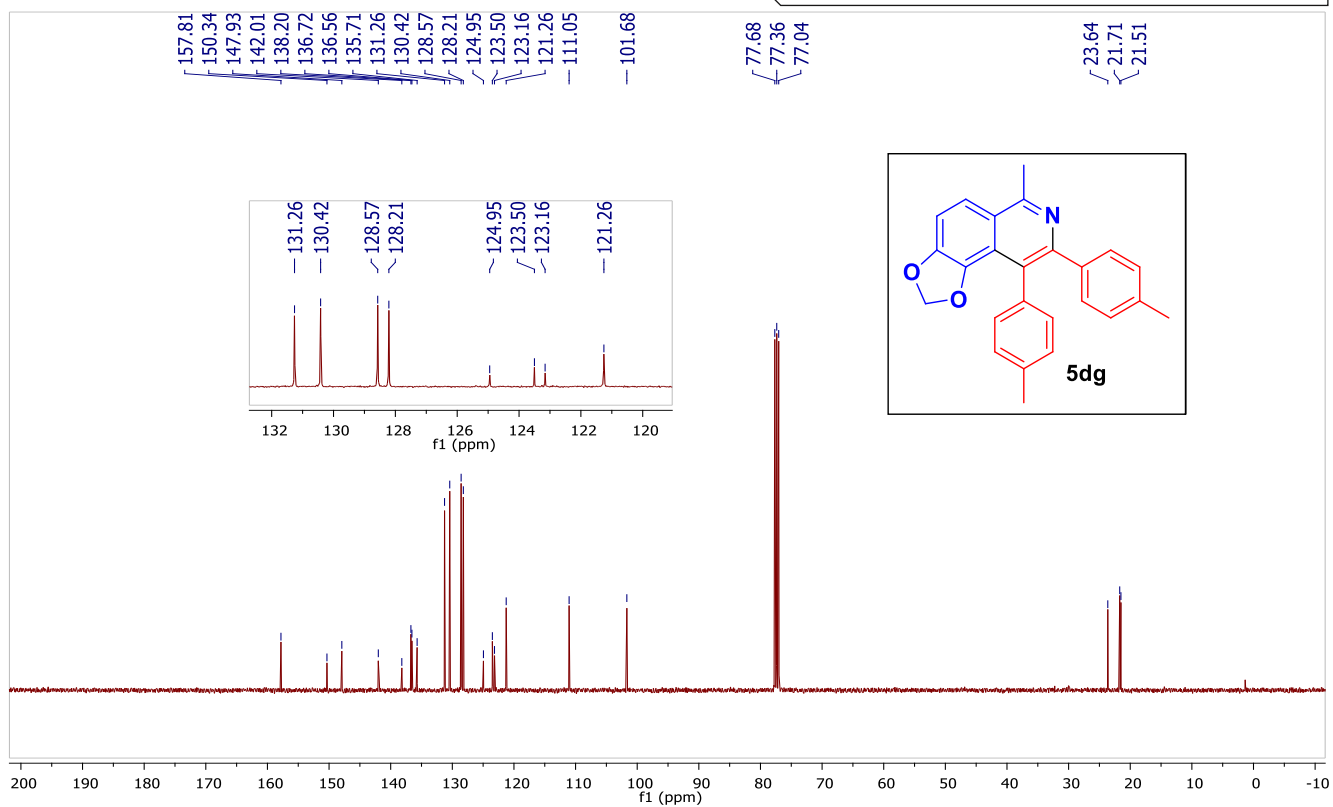

**<sup>1</sup>H NMR of 5dh (400 MHz, CDCl<sub>3</sub>)**

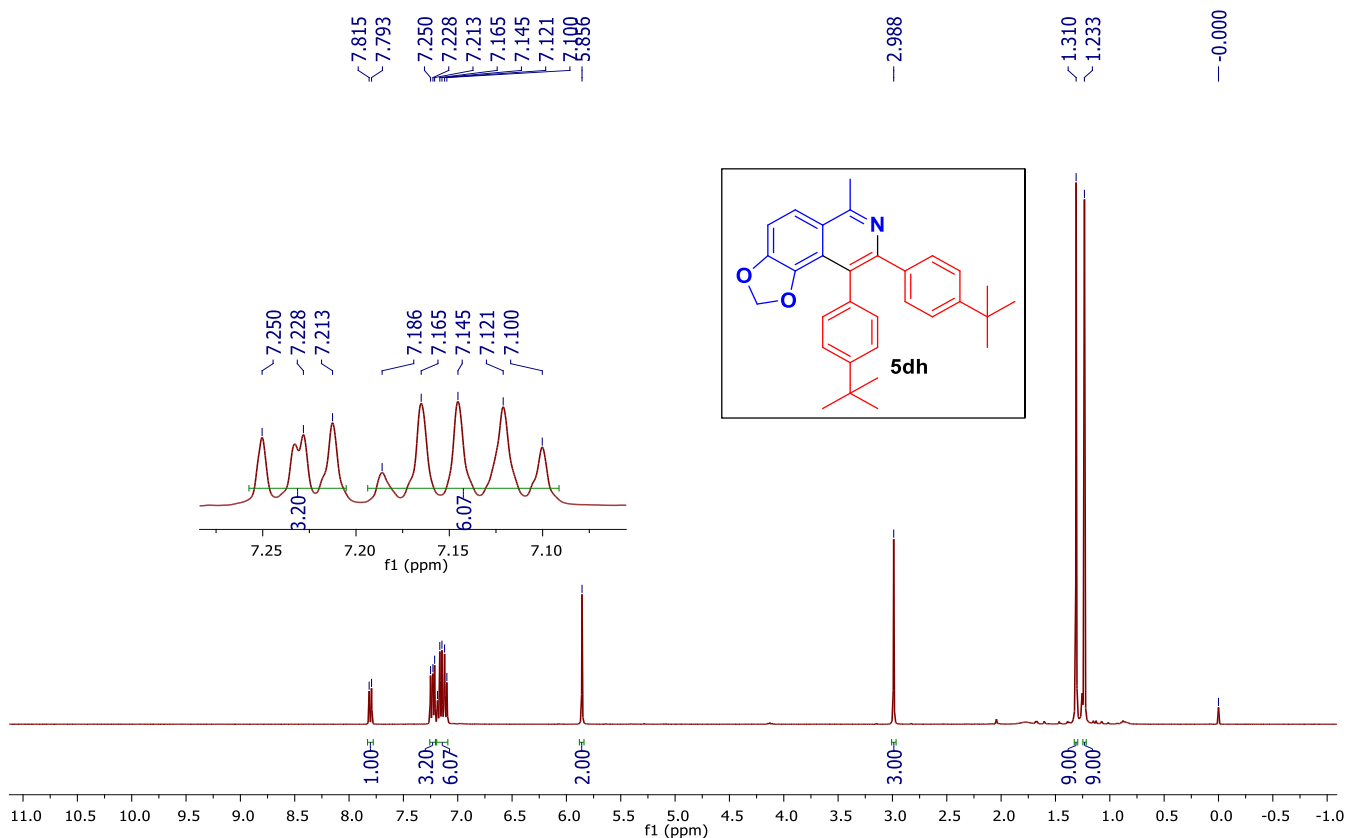

**<sup>13</sup>C{<sup>1</sup>H} NMR of 5dh (100 MHz, CDCl<sub>3</sub>)**

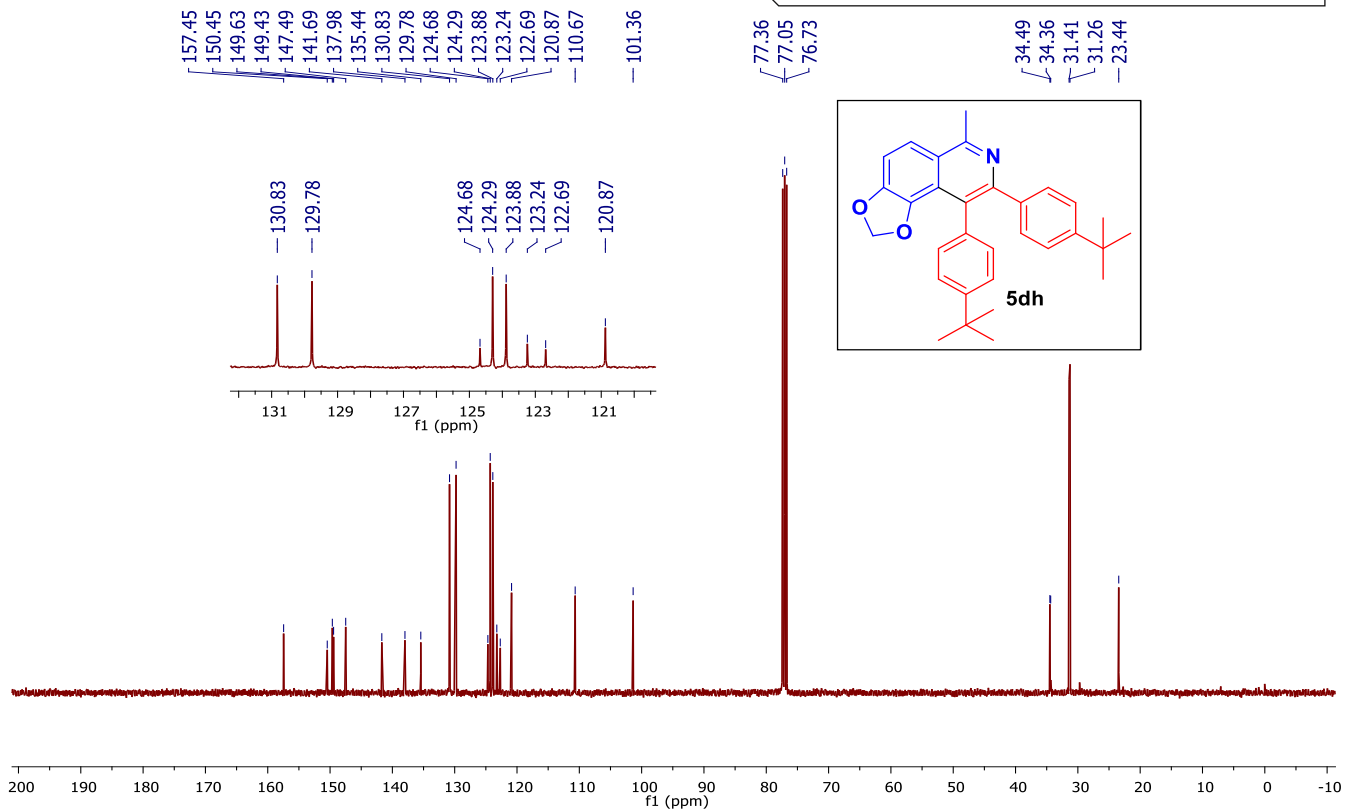

**<sup>1</sup>H NMR of 5di (400 MHz, CDCl<sub>3</sub>)**

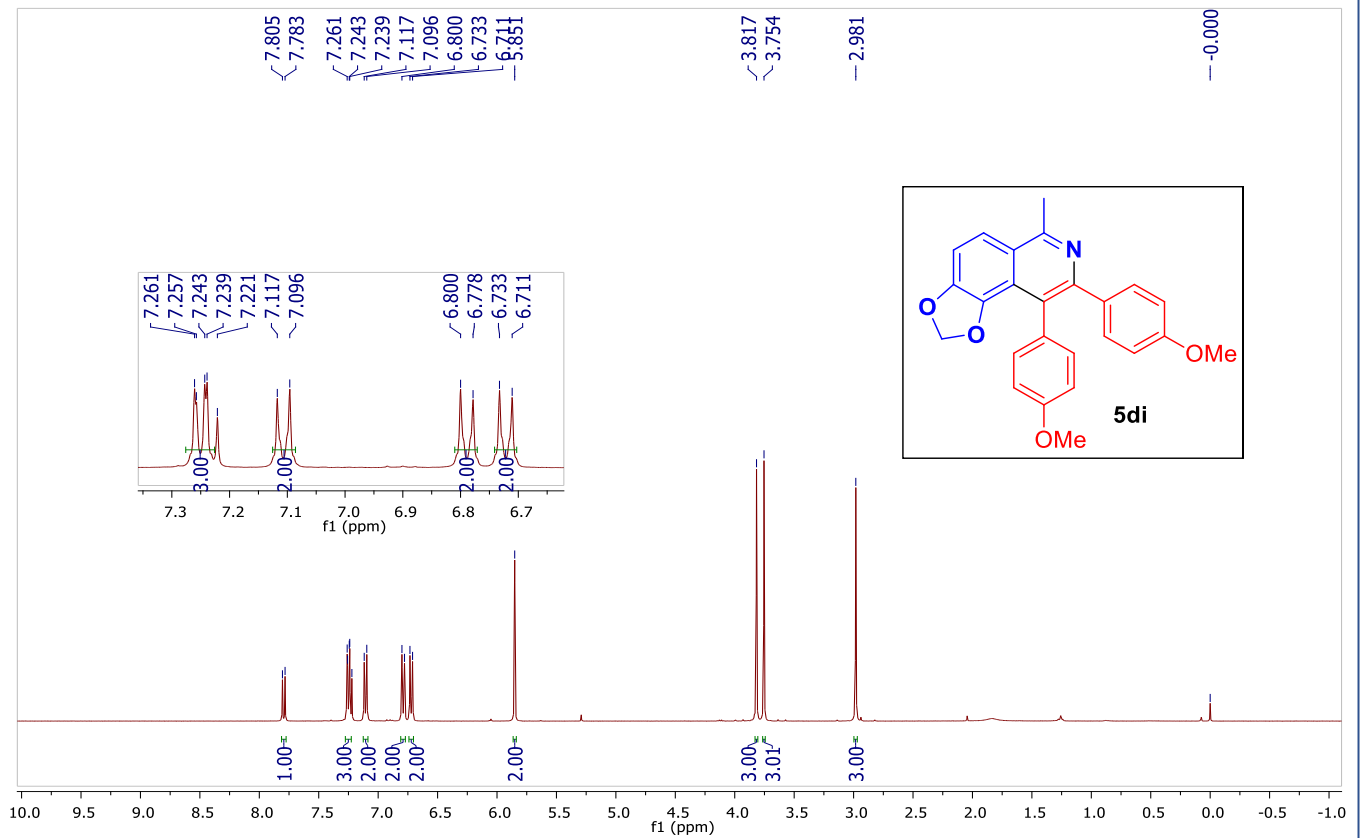

**<sup>13</sup>C{<sup>1</sup>H} NMR of 5di (176 MHz, CDCl<sub>3</sub>)**

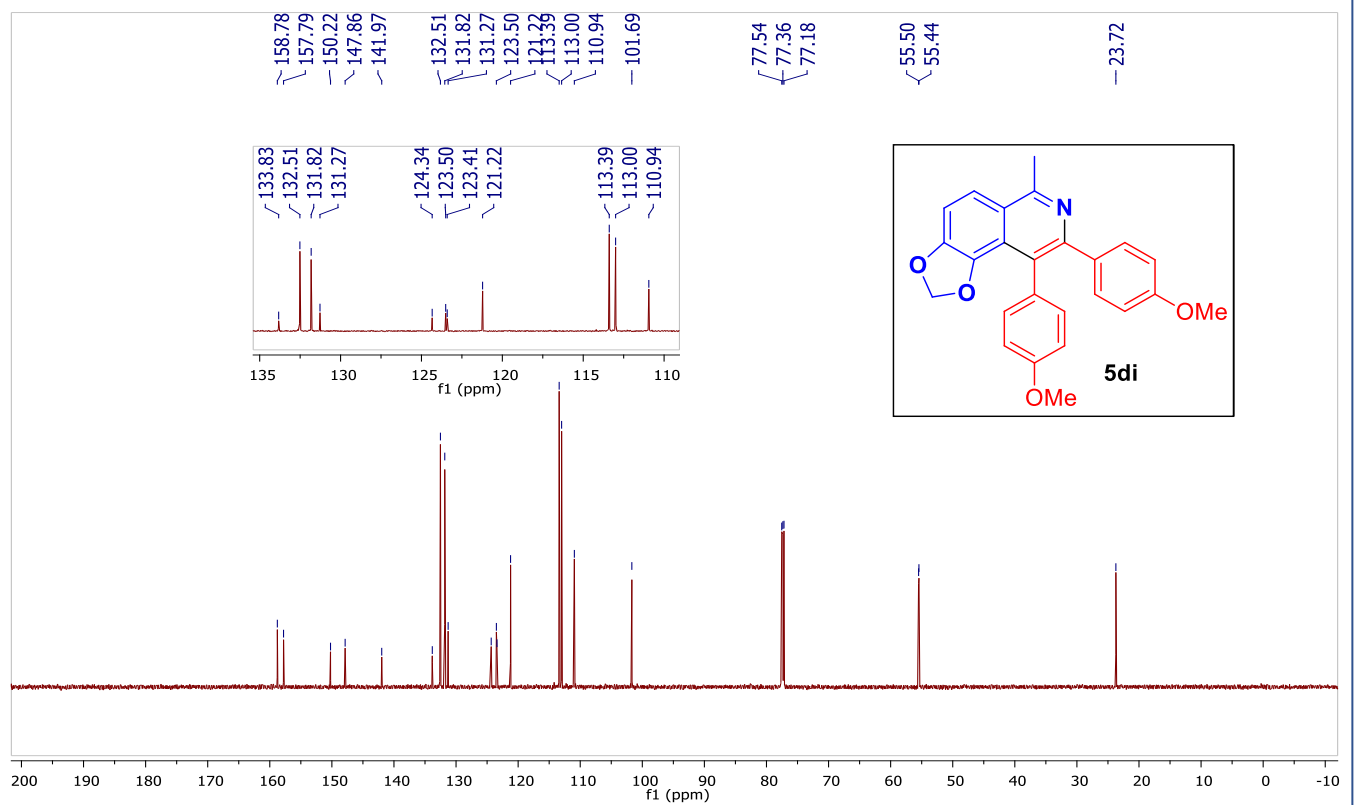

**<sup>1</sup>H NMR of 5dj (400 MHz, CDCl<sub>3</sub>)**

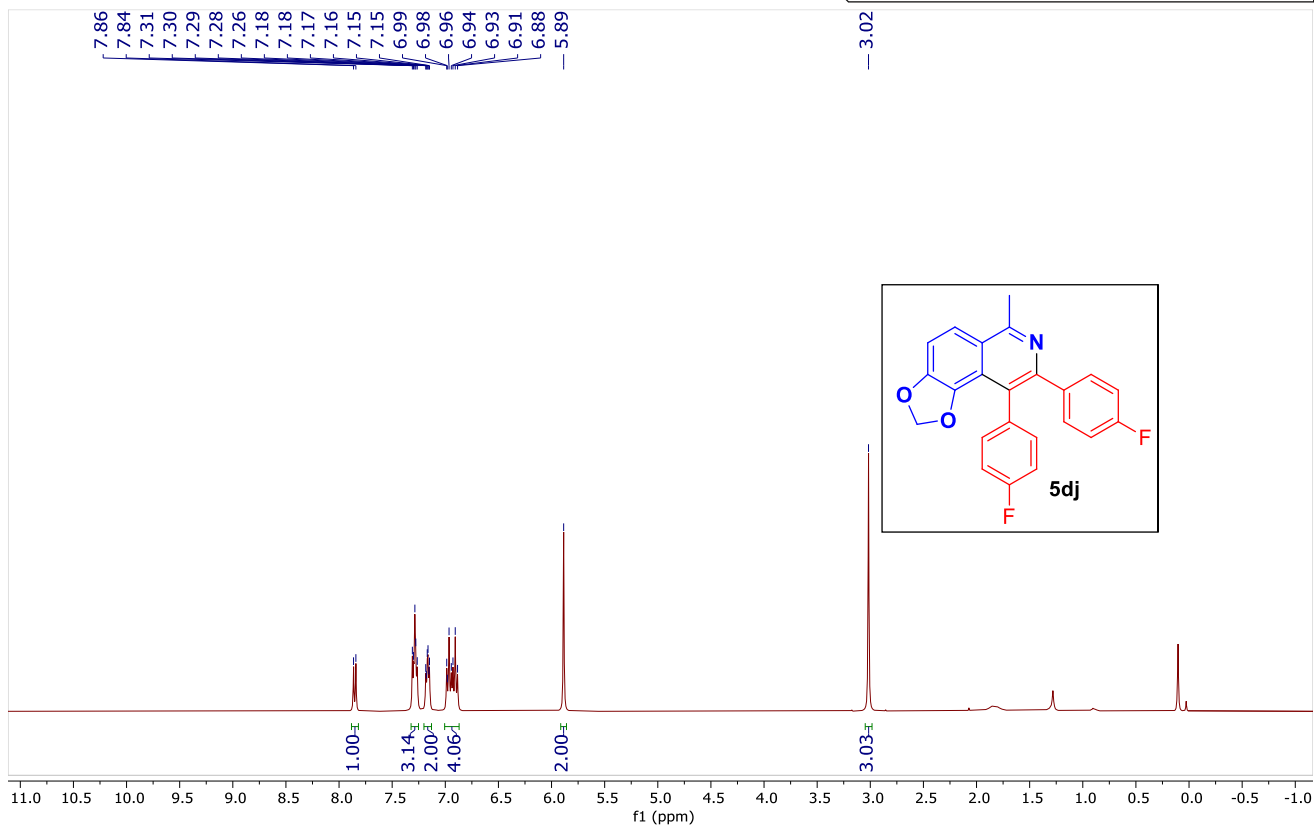

**<sup>13</sup>C{<sup>1</sup>H} NMR of 5dj (100 MHz, CDCl<sub>3</sub>)**

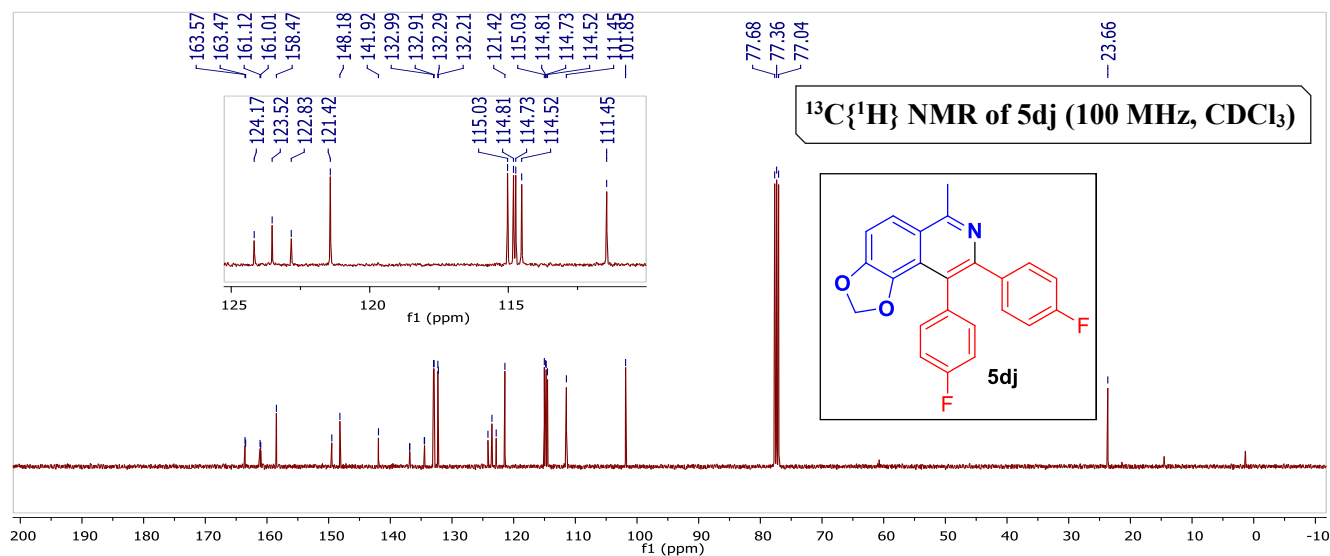

**<sup>19</sup>F NMR of 5dj (376 MHz, CDCl<sub>3</sub>)**

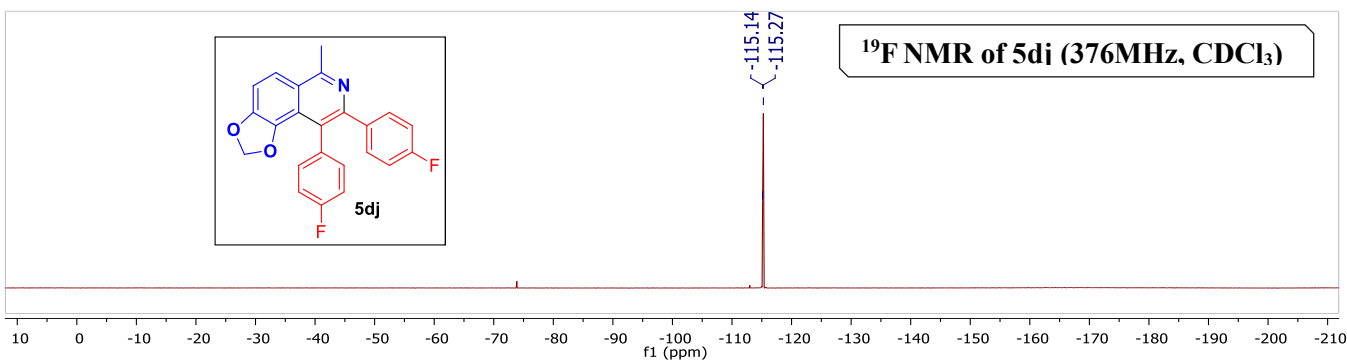

**<sup>1</sup>H NMR of 5dk (400 MHz, CDCl<sub>3</sub>)**

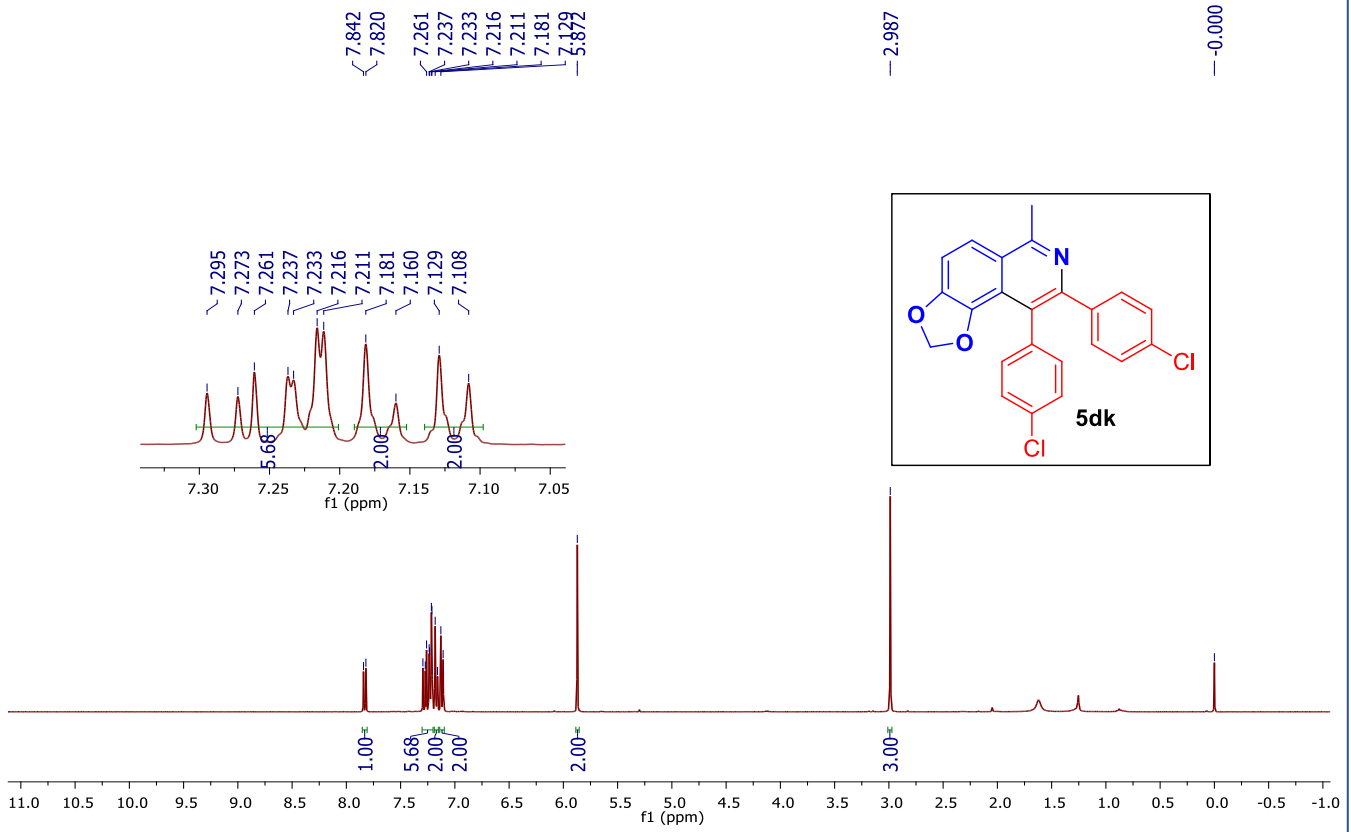

**<sup>13</sup>C{<sup>1</sup>H} NMR of 5dk (100 MHz, CDCl<sub>3</sub>)**

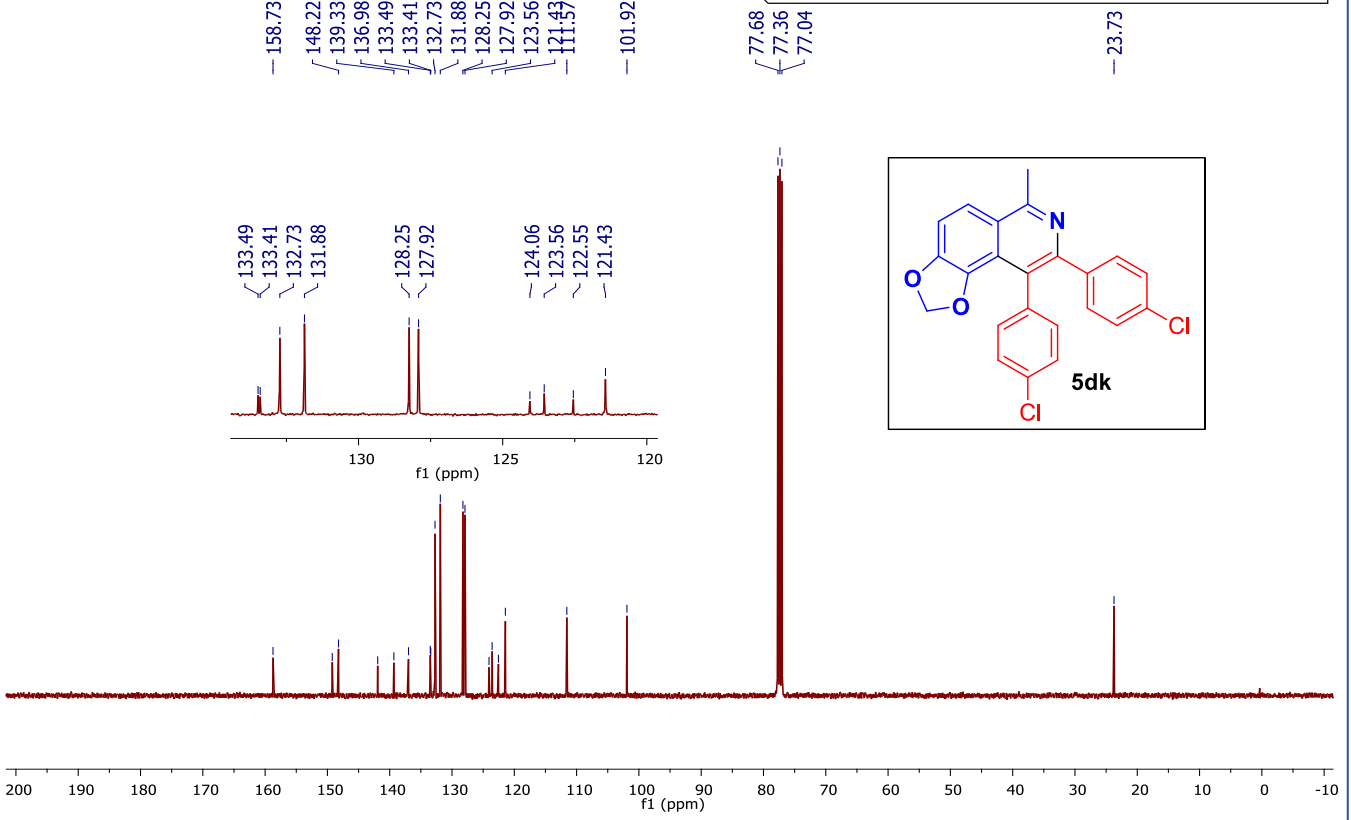

**<sup>1</sup>H NMR of 5dl (400 MHz, CDCl<sub>3</sub>)**

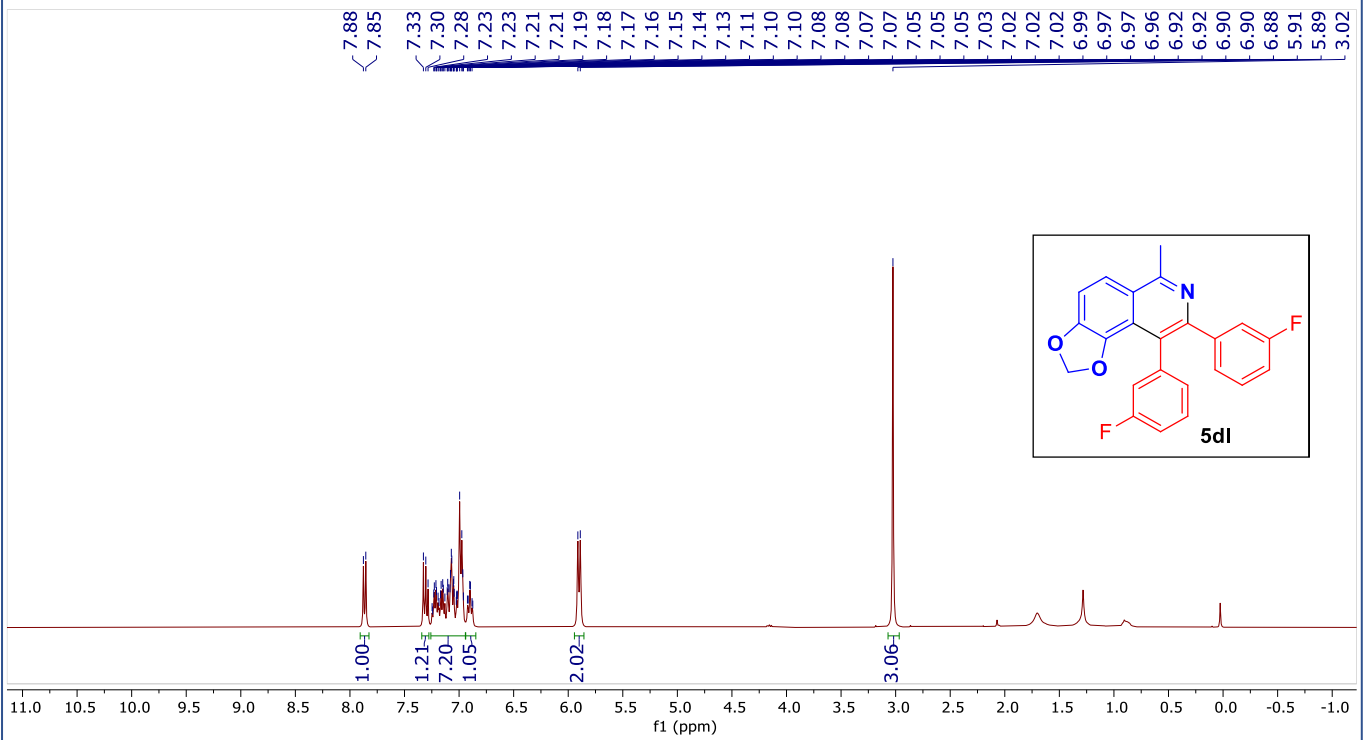

**<sup>13</sup>C{<sup>1</sup>H} NMR of 5dl (100 MHz, CDCl<sub>3</sub>)**

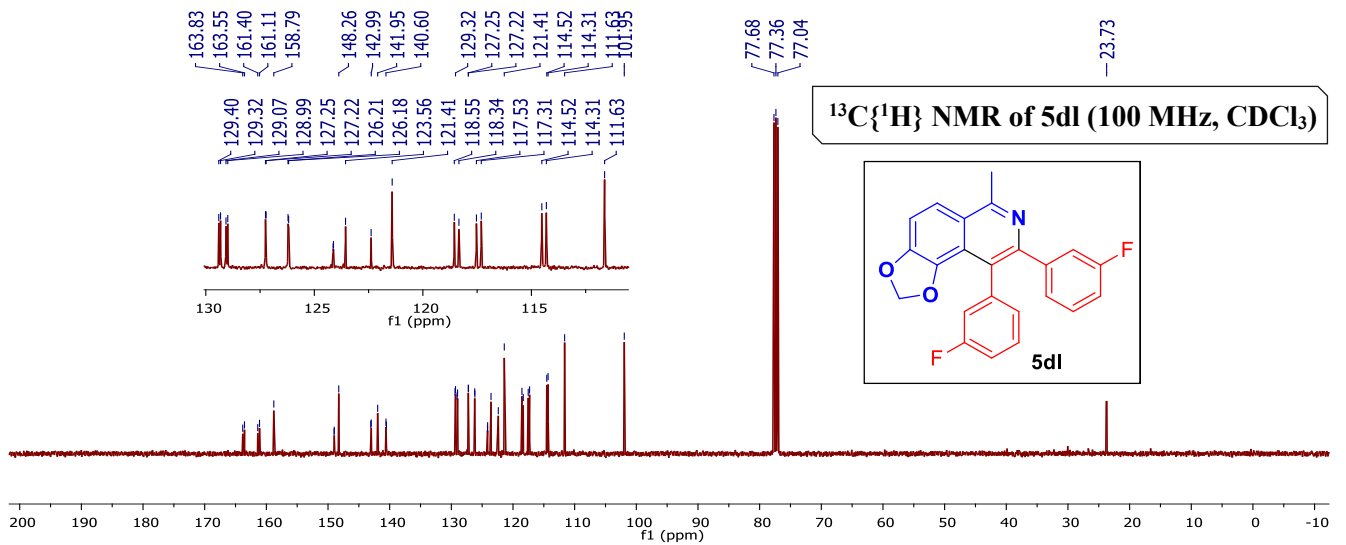

**<sup>19</sup>F NMR of 5dl (376 MHz, CDCl<sub>3</sub>)**

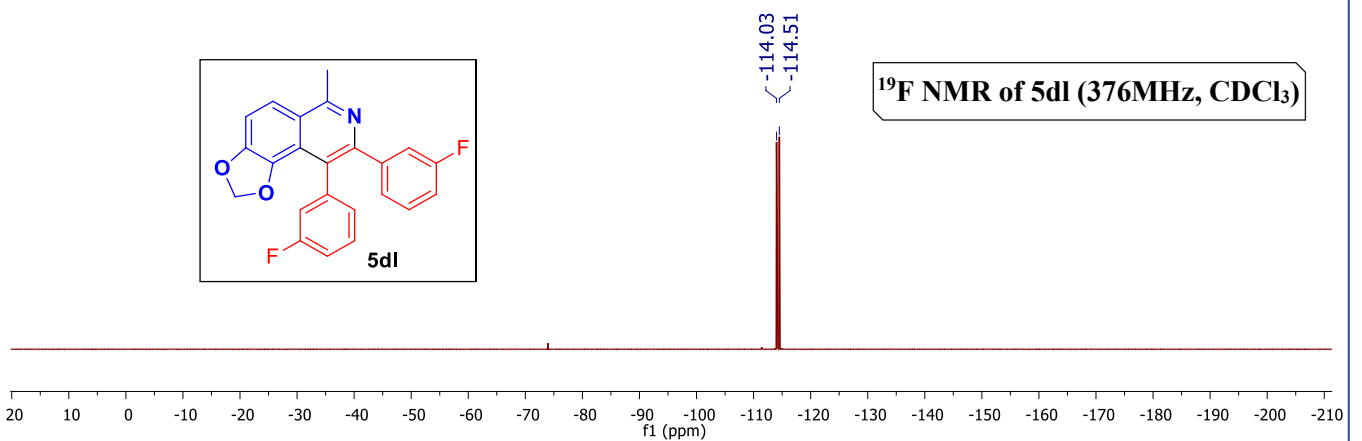

## 7. References

- (1) Gottlieb, H.E.; Kotlyar, V.; and Nudelman, A. *J. Org. Chem.*, **1997**, *62*, 7512-7515.
- (2) a) Liska, R.; and Dworak, C. *J. Polym. Sci. Pol. Chem.*, **2010**, *48*, 5865-5871; b) Kumar, S. C. S.; Kumar, N. V.; Srinivas, P.; and Bettadaiah, B. K. *Synthesis*, **2014**, *46*, 1847-1852.
- (3) Sakai, N.; Komatsu, R.; Uchida, N.; Ikeda, R.; and Konakahara, T. *Org. Lett.*, **2010**, *12*, 1300.
- (4) Mori, A.; Kawashima, J.; Shimada, T.; Suguro, M.; Hirabayashi, K.; and Nishihara, Y. *Org. Lett.*, **2000**, *2*, 2935.
- (5) White, C.; Yates, A.; and Maitlis, P. M. *Inorg. Synth.*, **1974**, *29*, 228.
- (6) (a) Gao, Q.-C.; Li, Y.-F.; Xuan, J.; Hu, X.-Q. *Beilstein J. Org. Chem.* **2023**, *19*, 100–106. (b) Zhang, M.; Zhang, H.-J.; Han, T.; Ruan, W.; Wen, T.-B. *J. Org. Chem.* **2015**, *80*, 620–627. (c) Unoh, Y.; Hirano, K.; Satoh, T.; Miura, M. *Tetrahedron* **2013**, *69*, 4454–4458. (d) Kudo, E.; Shibata, Y.; Yamazaki, M.; Masutomi, K.; Miyauchi, Y.; Fukui, M.; Sugiyama, H.; Uekusa, H.; Satoh, T.; Miura, M.; Tanaka, K. *Chem. - Eur. J.* **2016**, *22*, 14190–14194. (e) Yugandar, S.; Nakamura, H. *Chem. Commun.* **2019**, *55*, 8382–8385. (f) Mihara, G.; Ghosh, K.; Nishii, Y.; Miura, M. *Org. Lett.* **2020**, *22*, 5706–5711. (g) Ueura, K.; Satoh, T.; Miura, M. *J. Org. Chem.* **2007**, *72*, 5362–5367. (h) Mo, J.; Wang, L.; Cui, X. *Org. Lett.* **2015**, *17*, 4960–4963. (i) Li, X.-G.; Sun, M.; Jin, Q.; Liu, K.; Liu, P.-N. *J. Org. Chem.* **2016**, *81*, 3901–3910. (j) Inami, A.; Nishii, Y.; Hirano, K.; Miura, M. *Org. Lett.* **2023**, *25*, 3206–3209. (k) Li, C.; Xu, H.-B.; Zhang, J.; Liu, M.; Dong, L. *Org. Biomol. Chem.* **2020**, *18*, 1412–1416. (l) Too, O. C.; Wang, Y.-F.; Chiba, S. *Org. Lett.* **2010**, *12*, 5688-5691. (m) Zhang, S.; Huang, D.; Xu, G.; Cao, S.; Wang, R.; Peng, S.; Sun, J. *Org. Biomol. Chem.* **2015**, *13*, 7920–7923.
